# Supplementary material for: Development and Validation of a Scalable Next-Generation Sequencing System for Assessing Relevant Somatic Variants in Solid Tumors
Source: PubMed Central journal article supplement — Neoplasia. 2015 Apr 26;17(4):385–99. doi: 10.1016/j.neo.2015.03.004 (PMC4415141; doi:10.1016/j.neo.2015.03.004), 2015-04-26
Supplement: mmc1.pdf [file mmc1.pdf]

## **Development and validation of a scalable next-generation sequencing system for assessing relevant somatic variants in solid tumors**

Daniel H. Hovelson, Andrew S. McDaniel, Andi K. Cani, Bryan Johnson, Kate Rhodes, Paul D. Williams, Santhoshi Bandla, Geoffrey Bien, Paul Choppa, Fiona Hyland, Rajesh Gottimukkala, Guoying Liu, Manimozhi Manivannan, Jeffrey Schageman, Efren Ballesteros-Villagrana, Catherine S. Grasso, Michael J. Quist, Venkata Yadati, Anmol Amin, Javed Siddiqui, Bryan L. Betz, Karen E. Knudsen, Kathleen A. Cooney, Felix Y. Feng, Michael H. Roh, Peter S. Nelson, Chia-Jen Liu, David G. Beer, Peter Wyngaard, Arul M. Chinnaiyan, Seth Sadis, Daniel R. Rhodes, Scott A. Tomlins

### **SUPPLEMENTARY MATERIALS**

|                                            |                    |
|--------------------------------------------|--------------------|
| <b>Supplementary Materials and Methods</b> | <b>Pages 1-7</b>   |
| <b>Supplementary References</b>            | <b>Page 8</b>      |
| <b>Supplementary Figure Legends</b>        | <b>Pages 9-12</b>  |
| <b>Supplementary Figures 1-8</b>           | <b>Pages 13-20</b> |
| <b>Supplementary Tables</b>                | <b>Pages 21-82</b> |

### **Supplementary Materials and Methods**

Candidate genes with somatic driver mutations were derived from gain-of-function (GoF) and loss-of-function (LoF) analyses performed on 686,530 tumor samples with mutation data in Oncomine. GoF genes (oncogenes) were defined as those with a hotspot missense mutation (i.e. recurrent) rate >20% and deleterious mutation (i.e. nonsense and frameshift indels) rate <10%. Additionally, gene-level  $p$  values were estimated by the likelihood that a hotspot residue will have a given number of mutations by chance given the total number of mutations in that gene, with a false discovery rate (FDR) adjusted  $p$  value <0.1 required for classification as a GoF gene. LoF genes were defined as those with deleterious mutations in at least three samples and a combined deleterious and hotspot mutation frequency greater than 20%. Additionally, gene-level  $p$ -values were estimated, representing the significance of the proportion of deleterious mutations observed in each gene compared to all other genes, with a FDR adjusted  $p$ -value <0.1 required

for classification as a LoF gene. Genes failing to meet GoF/LoF criteria were considered passenger genes. This approach was previously validated using a trained classifier in 2,711 TCGA profiled samples from 13 cancer types[1].

Candidate driver CNA events were identified by performing a minimal common region (MCR) analysis that identified regions of recurrent CNA (defined  $\geq 3.7$  copies) or deletion ( $\leq 1$  copy) in  $\geq$  four samples (pan-cancer and in specific cancer type). Candidate regions were further filtered by imposing a requirement that at least one sample must have a copy number  $\geq 8$  for amplifications or  $\leq 1$  for deletions, and a further requirement that median event frequency was  $\geq 0.5\%$ . MCRs observed in different cancer types that shared common genes were identified. The most frequently amplified or deleted gene(s) within each set of overlapping MCRs was included in the candidate copy number gene list.

To identify additional fusions or novel 5'/3' fusion partners not present in the Mitelman database, we analyzed 6,438 primary tumor sample RNA-seq profiles contained within Oncomine using publicly available fusion prediction algorithms[2, 3]. This generated a large number of predicted fusions; we filtered out the following fusions to nominate driver candidates: fusions predicted in normal samples, those involving adjacent genes, homologous genes, or repetitive regions, and those involving transcriptional units in opposite orientations.

All candidate driver GoF, LoF and CNA genes, as well as gene fusions, were then assessed for evidence of near term potential clinical relevance. Genes (with or without a candidate variant) were considered for inclusion in OCP if they were 1) a target of FDA approved therapies, 2) associated with treatment recommendations from organizations such as the National Comprehensive Cancer Network (NCCN), 3) used as a biomarker for enrollment into ongoing clinical trials or 4) reported as associated with treatment response in clinical trials

(or published case reports). Additional genes were considered for inclusion based on 1) membership in the Sanger Cancer Gene Census, 2) known cancer involvement or 3) were associated with investigational therapies.

### **Tissue Cohorts**

The MO cohort consisted of all cancer specimens (including biopsy, resection and cell block specimens) sent during a five month period to the CLIA certified UM Molecular Oncology/Genetics Laboratory for 1) *EGFR*, *BRAF* or *KRAS* mutation testing or 2) *ALK* rearrangement testing. Testing for *EGFR* (exon 19 indels and residue 858 mutations by PCR based fragment analysis), *KRAS* (codon 12, 13 and 61 mutations by Sanger sequencing) and *BRAF* (codon 600 by allele-specific PCR or Sanger sequencing) was performed as described [4-6]. FISH for *ALK* rearrangement was performed using the FDA approved dual color break apart probe strategy (Abbott Molecular).

Only cases testing UM FFPE tissue blocks were considered for inclusion in the MO cohort. H&E slides and tissue blocks were reviewed after molecular testing to ensure sufficient material remained for OCP evaluation. A single FFPE sample was chosen if multiple blocks were tested. In cases where insufficient tissue remained in the block sent for molecular testing, concurrent blocks or blocks from prior diagnostic procedures were used. From 130 cases assessed during the above time period, 105 cases were from UM samples and had sufficient remaining tissue. Clinicopathologic information for all included cases is provided in **Table S4**.

### **Somatic variant identification**

Variants were annotated using Annovar[7]. VCF-level filtering was applied to annotated variants to remove synonymous or non-coding variants, those with flow corrected read depths (FDP) less than 20, flow corrected variant allele containing reads (FAO) less than 6, variant allele frequencies (FAO/FDP) less than 0.10 in tumor suppressors or less than 0.05 in oncogenes, extreme skewing of forward/reverse flow corrected reads calling the variant (FSAF/FSAR  $<0.2$  or  $>5$ ), or indels within homopolymer runs  $\geq 4$ . Any variants called in  $>25\%$  of all research samples sequenced herein or in other cohorts using any OCP version ( $n=776$  total) were excluded as technical artifacts, unless occurring at known Oncomine-prioritized hotspot variants. Variants with allele frequencies  $>0.5\%$  in ESP6500 or 1000 Genomes (from Annovar) or those reported in ESP6500 or 1000 Genomes with observed variant allele frequencies between 0.40 and 0.60 or  $>0.9$  were considered germline variants.

Base-level filtering was then applied to candidate somatic variants passing the above criteria to exclude additional technical artifacts or poorly supported variants, including removal of variants located at the last mapped base (or outside) of amplicon target regions, variants with the majority of supporting reads harboring excess additional mismatches or indels (likely sequencing error), those in repeat-rich regions (likely mapping artifacts), and variants occurring exclusively in one amplicon if overlapping amplicons cover the variant. Variants passing these filters were visually confirmed in IGV. We have previously confirmed this filtering criteria identifies variants that pass Sanger sequencing validation with  $>95\%$  accuracy[8, 9].

### **Copy number analysis**

To identify CNAs, we utilized total amplicon read counts provided by the Coverage Analysis Plug-in. Read counts per amplicon for each sample (normalized to total number of

reads for that sample) were divided by normalized counts from a composite normal male genomic DNA sample (comprised of multiple FFPE and frozen tissue, individual and pooled samples run on the same OCP version), yielding a copy number ratio for each amplicon. These copy number ratios were then corrected for GC content, and gene-level copy number estimates were determined by taking the coverage-weighted mean of the GC-corrected per-probe ratios, with expected error determined by the probe-to-probe variance, as described[8-10]. Genes with a  $\log_2$  copy number estimate of  $<-1$  or  $>0.81$  were considered to have high level loss or gain, respectively. As an estimate of data quality, we determined the standard deviation of the amplicon-level copy number estimates relative to the gene-level estimate for each gene per sample (**Fig S2**). Samples with median values  $>0.75$  were deemed low quality and excluded from further analysis.

### **Gene fusion analysis**

Within the Ion Reporter (4.2.0) Fusion analysis workflow, reads from the RNA AmpliSeq panel were aligned using TMAP to a gene reference of targeted chimeric fusion transcripts as well as reference sequences for expression imbalance and expression control gene targets. Read alignment required at least 70% overall homology to each side of the fusion breakpoint. Read counts were determined for expression control gene and expression imbalance targets; the exon imbalance metric for a given gene is calculated as the count of 3' target reads minus the count of 5' target reads divided by the sum of the expression control gene target read counts.

In the MO and LU cohorts, individual absolute fusion isoform read counts  $<200$  and non-prioritized gene fusions were excluded. In the PR cohort, individual absolute fusion isoform read

counts <30 were excluded. Individual isoform (i.e. *TMPRSS2:ERG* fusions involving *TMPRSS2* exon 1 fused to *ERG* exon 4 [T1E4]) and gene level (all *TMPRSS2:ERG* isoforms) were summed and normalized to the summed read count of the five housekeeping genes. For visualization, the  $\log_2$  [(normalized read counts)\*100,000] was used.

### qRT-PCR

qRT-PCR was performed to confirm the expression of *ERC1:BRAF* in MO-17 and *TPR:NTRK1* in MO-35 as detected by OCP. Primers and probes (5' FAM; ZEN/Iowa Black FQ dual quenchers) were designed using PrimerQuest ([www.idtdna.com/Primerquest/Home/Index](http://www.idtdna.com/Primerquest/Home/Index), hg 19 genome assembly) and obtained from IDT. Primer/probes sequences are given in **Table S16**. Reverse transcription (RT) of 1 $\mu$ g RNA was performed using Omniscript RT (Qiagen) in the presence of RNase Inhibitor (Qiagen) and gene specific priming using a pool of the 5 reverse primers used in qPCR (50nM final concentration of each primer) at 37 C for 1 hour. qPCR reactions (15ul) were performed in triplicate using TaqMan Universal Master Mix II (Applied Biosystems), 50ng cDNA equivalent per reaction and a final concentration of 0.9uM each primer and 0.25uM probe in 384 well plates on the QuantStudio 12K Flex (Applied Biosystems). Baseline and  $C_t$  thresholds were set using QuantStudio 12K Flex Real-Time PCR System Software. All  $C_t$  threshold values >40 were set to 40.  $\log_2$  expression of *TPR:NTRK1*(T21N10), *ERC1:BRAF*(E12B9) and *ERC1:BRAF*(E12B10) were determined by the  $\Delta\Delta^{C_t}$  method using the *GAPDH* and *HMBS*  $C_t$  geometric mean as the reference and the average of the 5 assessed MO samples without gene fusion detection by OCP as the calibrator. A no template control (water subjected to RT as above) was processed in parallel.

### **ERBB2 immunohistochemistry (IHC)**

IHC for ERBB2 was performed using the Ventana Benchmark System (Ventana Medical Systems; Tucson, Arizona) on 4-5 $\mu$ m thick FFPE tissue sections in the University Of Michigan Department of Pathology Clinical IHC Laboratory using pre-dilute mouse anti-ERBB2 monoclonal antibody (clone 4B5).

### **Comprehensive Cancer Panel profiling**

PR-185 and PR-186 (FFPE prostate cancer specimens) were profiled using the Ion Torrent Comprehensive Cancer Panel (CCP) as described[9].

**Supplementary References:**

- [1] Tomlins SA, Wyngaard P, Khazanov N, Williams P, Bowden E, Sadis S, Rhodes DR (2012). Analysis of 2,700 Cancer Exomes to Identify Novel Cancer Drivers and Therapeutic Opportunities *European Journal of Cancer* **48**, 134-134.
- [2] Kim D, Salzberg SL (2011). TopHat-Fusion: an algorithm for discovery of novel fusion transcripts *Genome biology* **12**, R72.
- [3] McPherson A, Hormozdiari F, Zayed A, Giuliany R, Ha G, Sun MG, Griffith M, Heravi Moussavi A, Senz J, Melnyk N, et al. (2011). deFuse: an algorithm for gene fusion discovery in tumor RNA-Seq data *PLoS Comput Biol* **7**, e1001138.
- [4] Betz BL, Roh MH, Weigelin HC, Placido JB, Schmidt LA, Farmen S, Arenberg DA, Kalemkerian GP, Knoepp SM (2011). The application of molecular diagnostic studies interrogating EGFR and KRAS mutations to stained cytologic smears of lung carcinoma *Am J Clin Pathol* **136**, 564-571.
- [5] Bernacki KD, Betz BL, Weigelin HC, Lao CD, Redman BG, Knoepp SM, Roh MH (2012). Molecular diagnostics of melanoma fine-needle aspirates: a cytology-histology correlation study *Am J Clin Pathol* **138**, 670-677.
- [6] Hookim K, Roh MH, Willman J, Placido J, Weigelin HC, Fields KL, Pang J, Betz BL, Knoepp SM (2012). Application of immunocytochemistry and BRAF mutational analysis to direct smears of metastatic melanoma *Cancer Cytopathol* **120**, 52-61.
- [7] Chang X, Wang K (2012). wANNOVAR: annotating genetic variants for personal genomes via the web *J Med Genet* **49**, 433-436.
- [8] Cani AK, Hovelson DH, McDaniel AS, Sadis S, Haller MJ, Yadati V, Amin AM, Bratley J, Bandla S, Williams PD, et al. (2015). Next-Gen Sequencing Exposes Frequent MED12 Mutations and Actionable Therapeutic Targets in Phyllodes Tumors *Mol Cancer Res*.
- [9] Warrick JI, Hovelson DH, Amin A, Liu CJ, Cani AK, McDaniel AS, Yadati V, Quist MJ, Weizer AZ, Brenner JC, et al. (2015). Tumor evolution and progression in multifocal and paired non-invasive/invasive urothelial carcinoma *Virchows Arch* **466**, 297-311.
- [10] Grasso C, Butler T, Rhodes K, Quist M, Neff TL, Moore S, Tomlins SA, Reinig E, Beadling C, Andersen M, et al. (2015). Assessing copy number alterations in targeted, amplicon-based next-generation sequencing data *J Mol Diagn* **17**, 53-63.



### **Supplementary Figure Legends**

**Figure S1. Assessment of OCP copy number alteration (CNA) profiling data noise.** For each sample across the MO, LU and PR cohorts, the amount of noise in the copy number profiling data was assessed by determining the standard deviation of the target-level copy number estimates relative to the gene-level estimate for each gene in the sample. Values for all genes are plotted per sample, and samples with median values  $>0.75$  (shown in red) were deemed low quality and excluded from CNA analysis.

**Figure S2. Assessment of AcroMetrix Oncology Hotspot Control (AOHC) panel.** For each single nucleotide variant (SNP), short insertion/deletion (INDEL), and multi-nucleotide polymorphism (MNP) present in AOHC and targeted by OCP (n=398 total variants), the observed variant allele frequency is plotted. Each bar corresponds to a single variant, and variants are sorted in order of descending observed variant frequency, with the expected variant allele frequency (0.20 for all alleles) indicated. Bars are colored by variant type and homopolymer context ( $<$  or  $\geq$  4bp in length). Variants undetected by automated variant calling are indicated in inset. The median and interquartile range for observed variant frequency is indicated as in the legend.

**Figure S3. Copy number profiles from the molecular diagnostics (MO) cohort.**

Unsupervised hierarchical clustering of copy number profiles from MO samples. Copy number ratios ( $\log_2$ ) for genes targeted by OCP are shown according to the color scale. Genes are arranged in genome order (from top to bottom). Pathological information is given in the header according to the legend.

**Figure S4. Copy number profiles from the lung cancer (LU) cohort.** Unsupervised hierarchical clustering of copy number profiles from LU samples. Copy number ratios ( $\log_2$ ) for genes targeted by OCP are shown according to the color scale. Genes are arranged in genome order (from top to bottom). Pathological information is given in the header according to the legend.

**Figure S5. Copy number profiles from the prostate cancer (PR) cohort.** Unsupervised hierarchical clustering of copy number profiles from PR samples. Copy number ratios ( $\log_2$ ) for genes targeted by OCP are shown according to the color scale. Genes are arranged in genome order (from top to bottom). Pathological information is given in the header according to the legend.

**Figure S6. OCP as a translational research tool identifies *IDH1* R132 mutations as defining a rare subtype of ETS<sup>-</sup> prostate cancer.** **A.** An ETS fusion negative prostate cancer (PR-122) without other OCP defined actionable alterations harbored an *IDH1* R132H mutation. **B.** Distribution of *IDH1* R132 mutations and combined *ERG* fusions, *ETVI* fusions and *SPOP* mutations from 453 publically available sequenced prostate cancers (see **Table S13**). Two sided Fisher's exact test significance is given.

**Figure S7. OCP profiling of paired pre-/post-therapy prostate cancer specimens identifies *CTNNB1* amplification/mutation as an adaptive (or selected) response to ADT and/or**

**chemotherapy. A.** OCP profiling of pre- and post-treatment prostate cancer supports activating *CTNNB1* mutation as an adaptive response. PR-77 is an untreated diagnostic (dx) primary Gleason score 9 prostate cancer and PR-88 is a subsequent castration resistant prostate cancer (CRPC) bladder metastasis obtained after ADT, XRT and chemotherapy that had AR<sup>-</sup> phenotype. OCP profiling demonstrates shared high level *MCL1* and *MYC* CNAs (and non-prioritized high level *BRCA1* amplification), consistent with clonality; however a *TMPRSS2:ERG* fusion (exons T2E2) was only identified by the OCP RNA-seq panel in PR-77, consistent with the AR<sup>-</sup> phenotype in PR-88. PR-88 uniquely harbored *AR* amplification (a known ADT resistance mechanism) and *CDKN2A* deletion, as well as a *CTNNB1* S37C (variant allele frequency 10%). No read support for *CTNNB1* S37C was present in PR-77 (>5,000 reads). **B.** Using the Ion Torrent Comprehensive Cancer Panel (CCP), which targets all coding exons of 409 cancer related genes, we profiled the diagnostic prostate biopsy tissue (PR-185, top) from a 49 year old man presenting with M1 (lymph node and liver metastases) prostate cancer. After rapidly developing CRPC after ADT and chemotherapy, liver biopsy of a metastasis (PR-185, middle) and an epidural metastasis resection specimen (PR-160, bottom) were obtained. PR-185 was profiled on the CCP and PR-185 was profiled using the OCP. All three tumors were gene fusion negative by the RNA component of the OCP. Integrative profiles for each tumor are shown as in **A**, except for CCP copy number plots, gene level copy number ratios are plotted as points with 95% confidence intervals indicated. Shared *TP53* R248 mutations and broad low level CNAs (shown in red and blue points/amplicons, including 1 or 2 copy *PTEN* loss) were present in each sample, consistent with clonal progression. High level, focal *AR*, *PIK3CA* and *CTNNB1* amplifications were present in both CRPC specimens but not the pretreatment sample, consistent with adaptive (or selected) alterations in response to therapy.

**Figure S8. Comparison of variant detection in complete and downsampled sequencing data using the Acrometrix Oncology Hotspot Control (AOHC) molecular standard. Variant allele frequencies (VFs) independently derived from complete and downsampled sequencing data across a set of 389 known indels, multi nucleotide variants (MNV) and single nucleotide variants (SNV) called in the Acrometrix Oncology Hotspot Control (AOHC) sample. Original VFs calculated by TVC (in orange) utilized the complete set of mapped reads for the AOHC sample (average per-base coverage across OCP targeted regions: 1,823x). Random downsampling of original sequencing data enabled concordance analyses at 100x, 250x, and 500x effective average coverage across OCP targeted regions, with VFs for all variants plotted in blue. Percentages indicate proportion of original variant calls that were also made from each downsampled dataset. Pearson correlation coefficients ( $r$ ) between complete and downsampled VFs are provided; \*\*= $p < 0.001$ .**



Figure S2

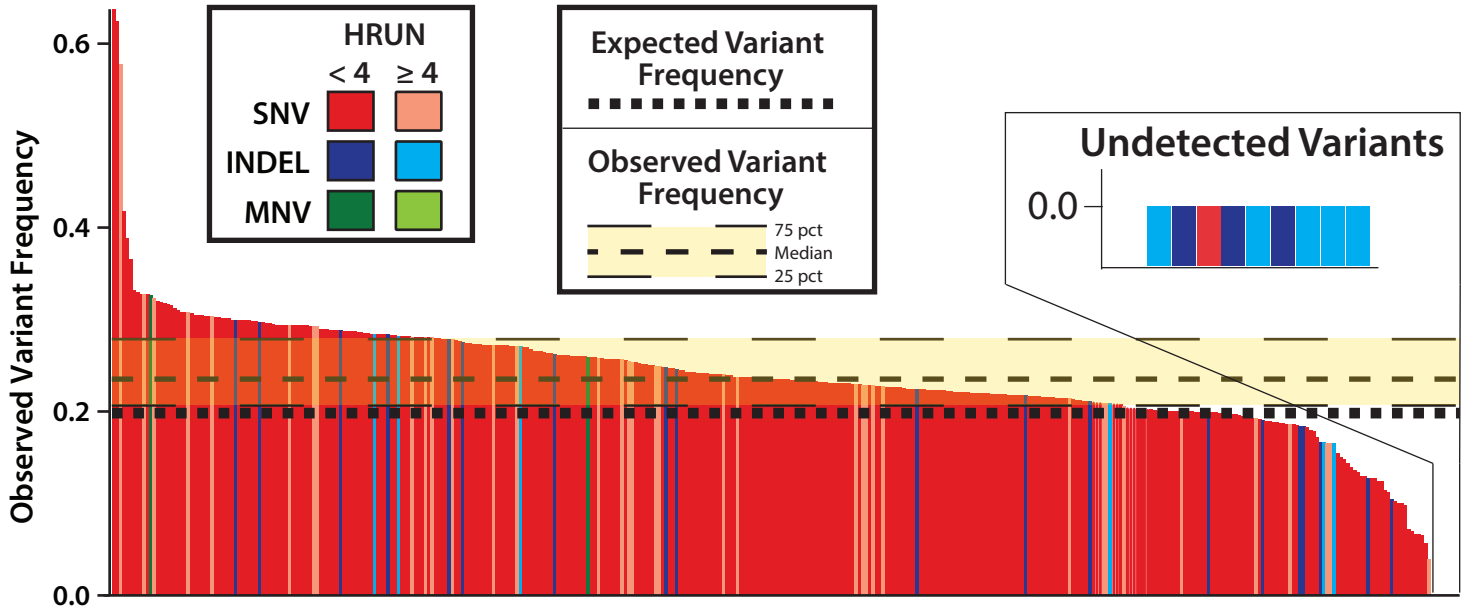



# Figure S4

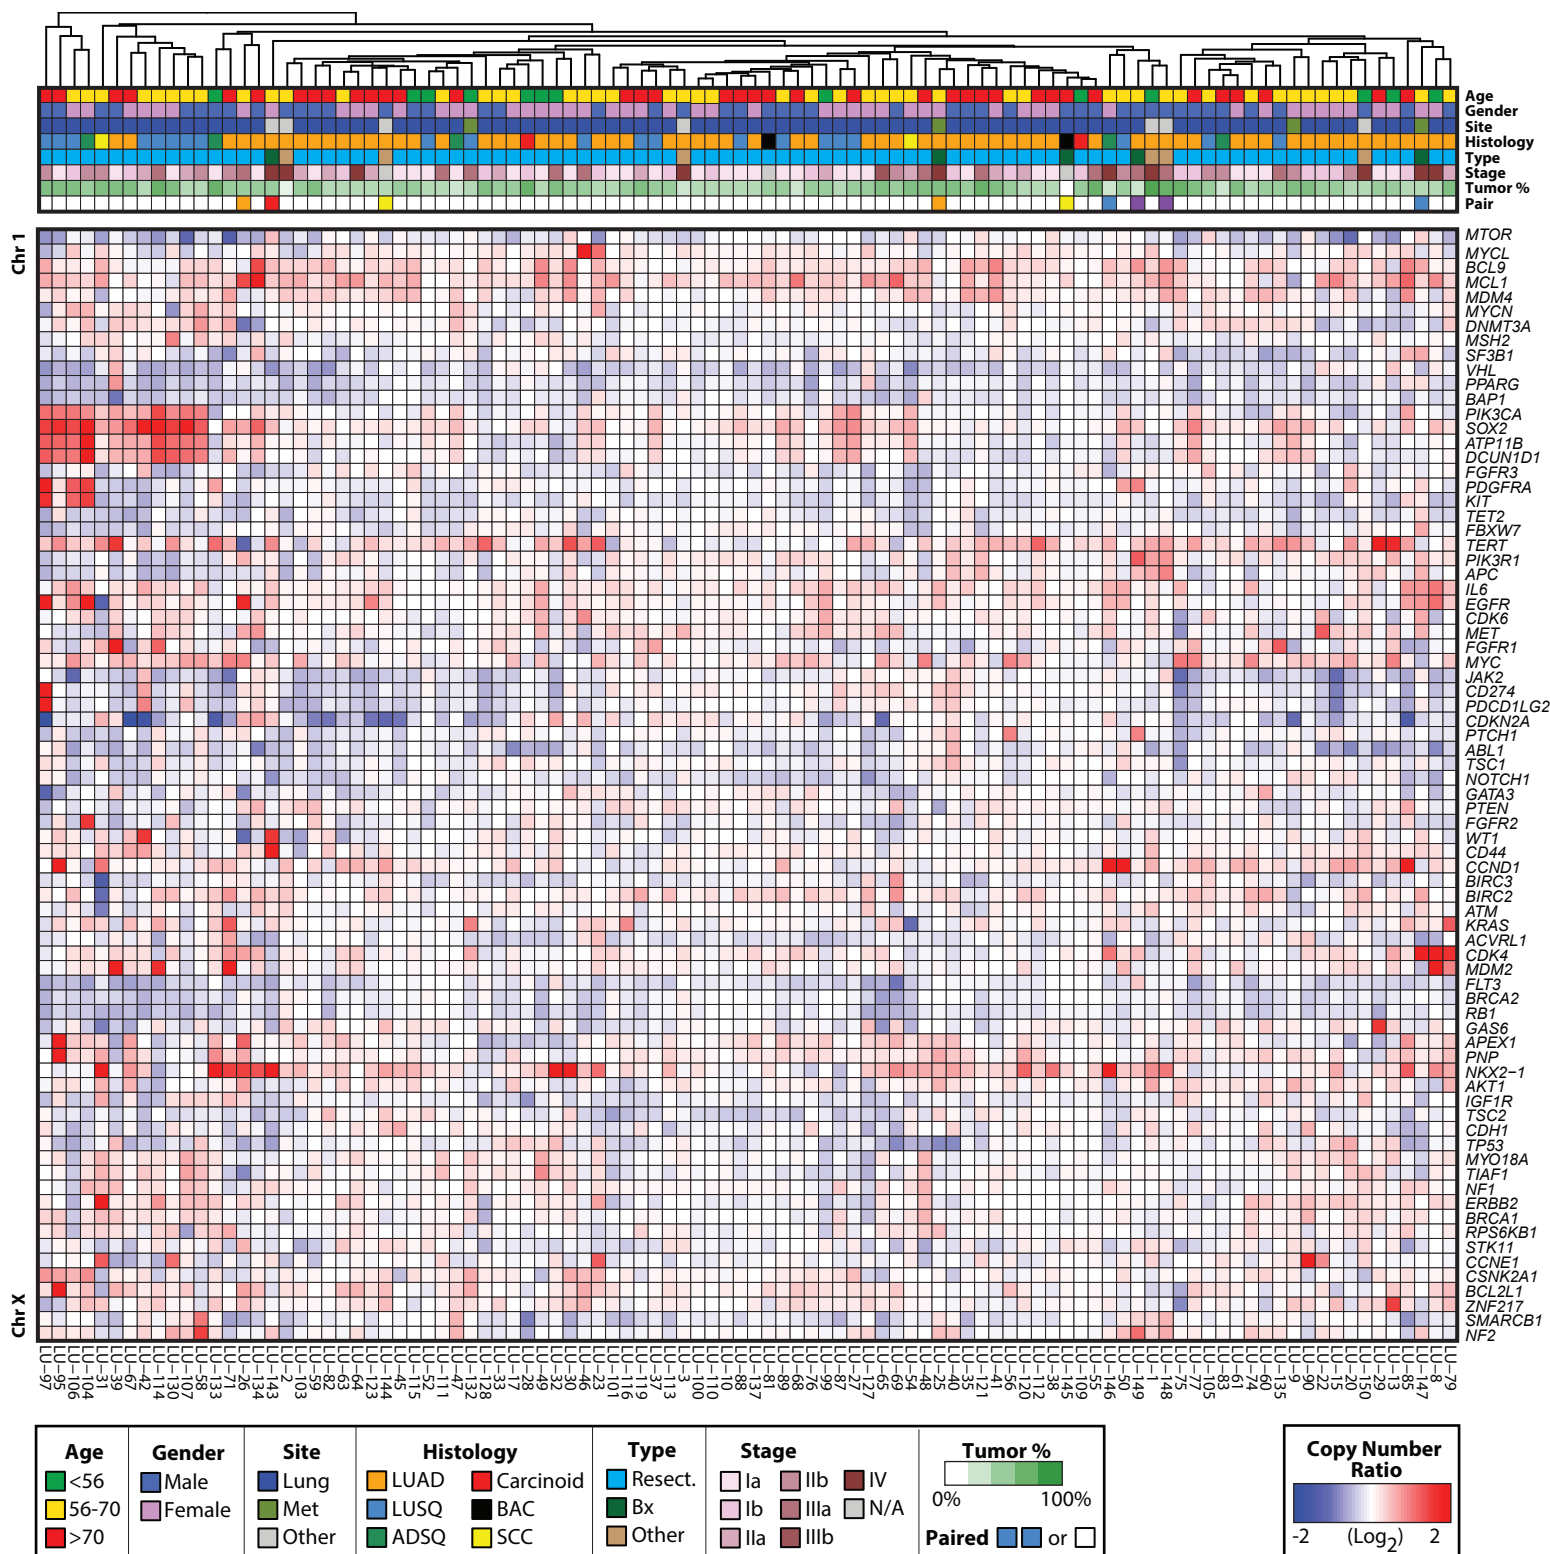



# Figure S5

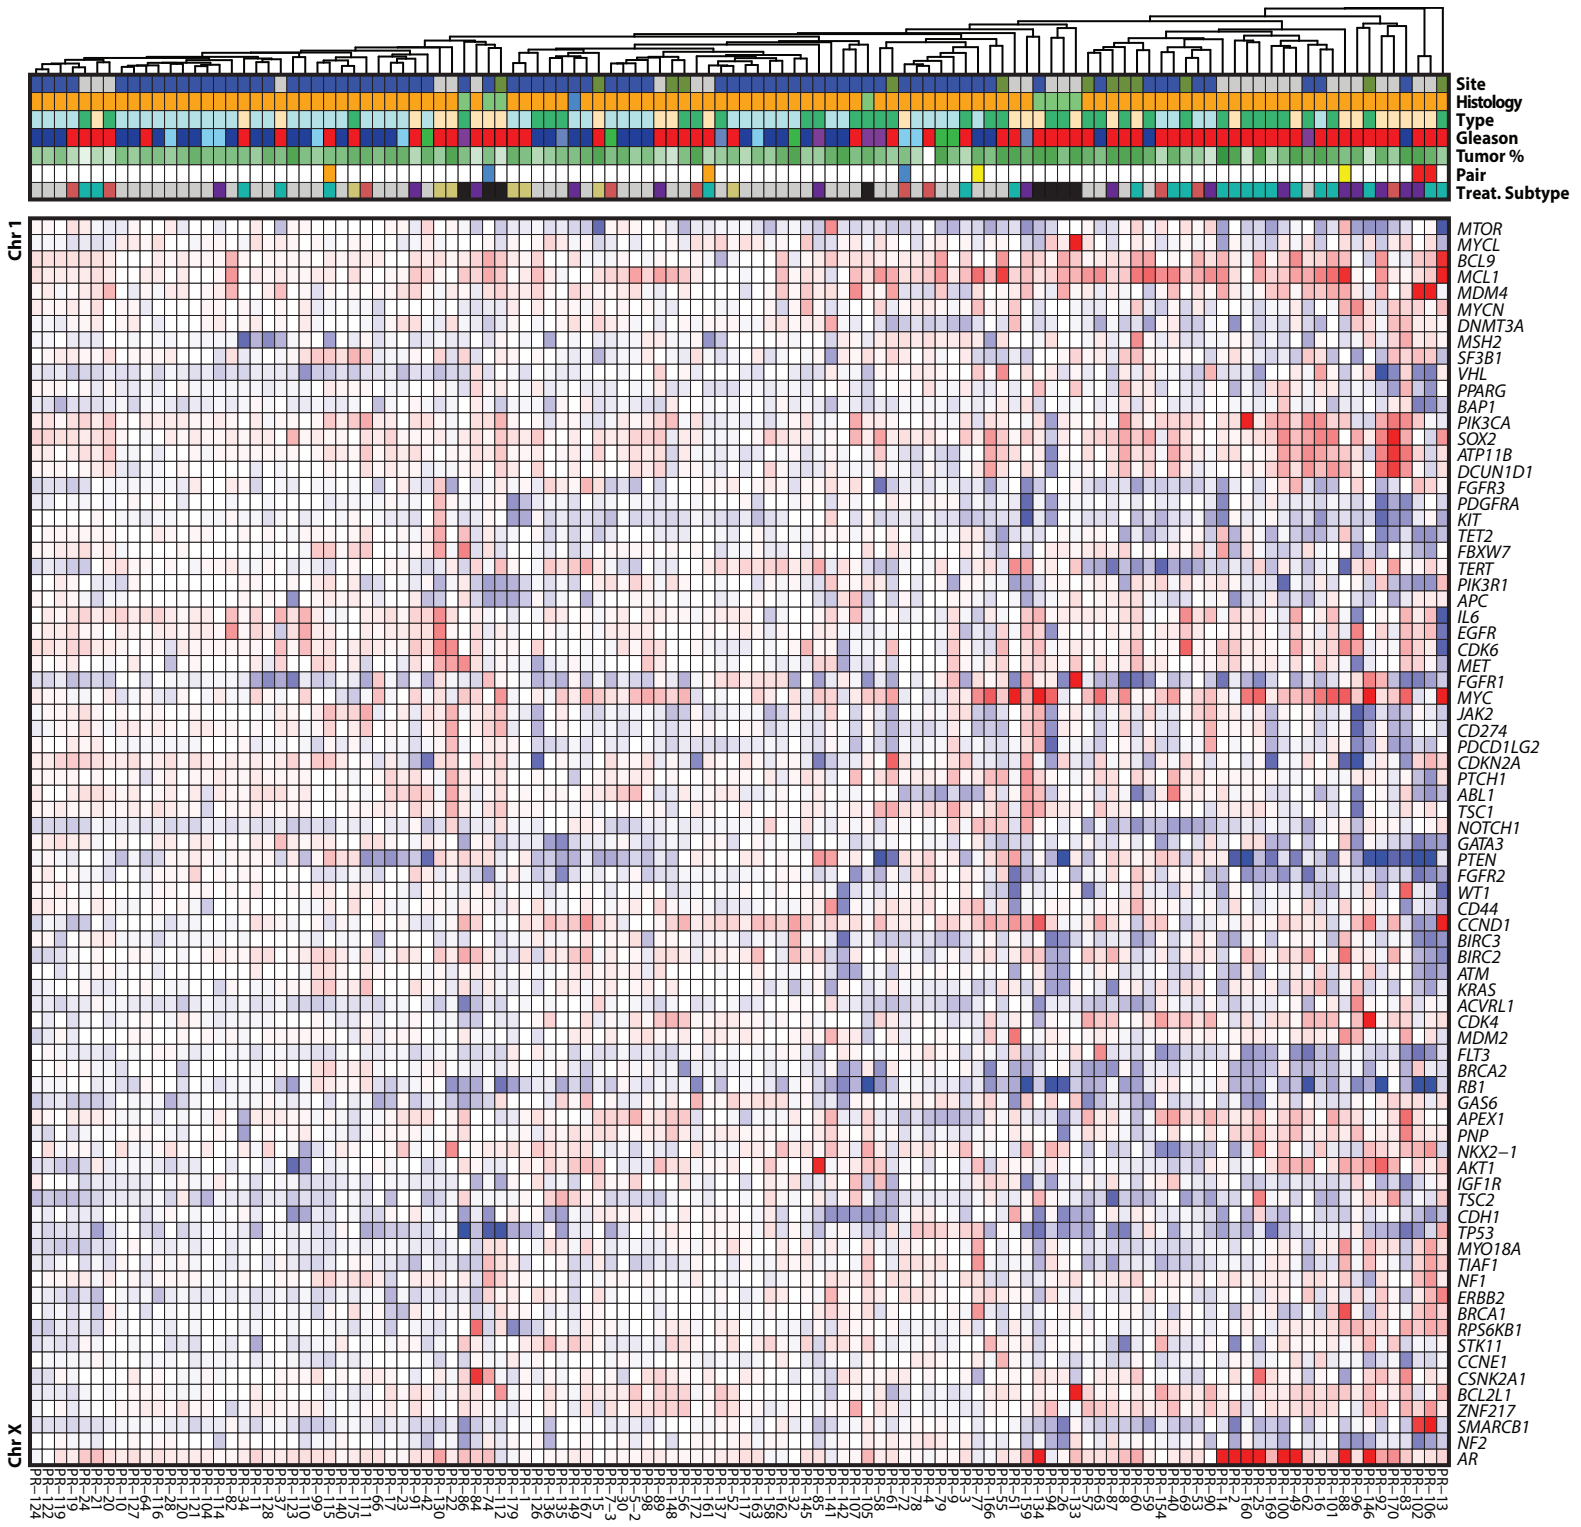

| Age   | Site   | Histology | Type    | Gleason | Tumor %                     | Treat. Subtype |
|-------|--------|-----------|---------|---------|-----------------------------|----------------|
| <56   | Pros   | PRAD      | RRP     | 7       | 0% to 100% (Green gradient) | None           |
| 56-70 | LN met | SCC       | Bx      | 7/5     | Paired                      | RT             |
| >70   | Met    | SQ        | Resect. | 8       | or                          | ADT            |
|       |        |           |         | 9       |                             | AR-            |
|       |        |           |         | 10      |                             | ADT+           |
|       |        |           |         | N/A     |                             | SCC            |

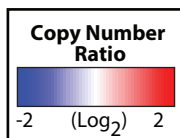

# Figure S6

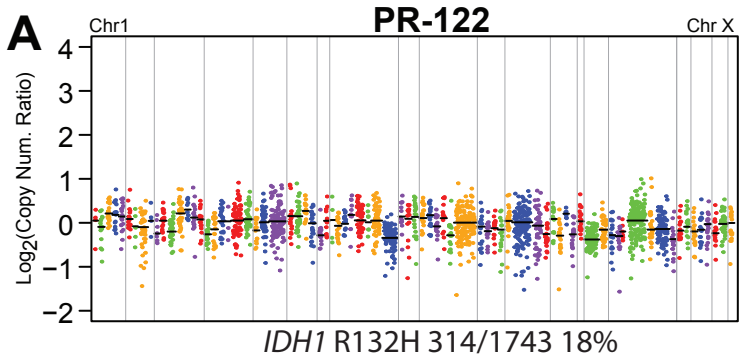

**B**

|                          |   | ERG <sup>+</sup> /ETV1 <sup>+</sup> /SPOP <sup>mut</sup> |     |
|--------------------------|---|----------------------------------------------------------|-----|
|                          |   | +                                                        | -   |
| IDH1 R132 <sup>mut</sup> | + | 0                                                        | 6   |
|                          | - | 269                                                      | 178 |

$p = 0.004$

# Figure S7

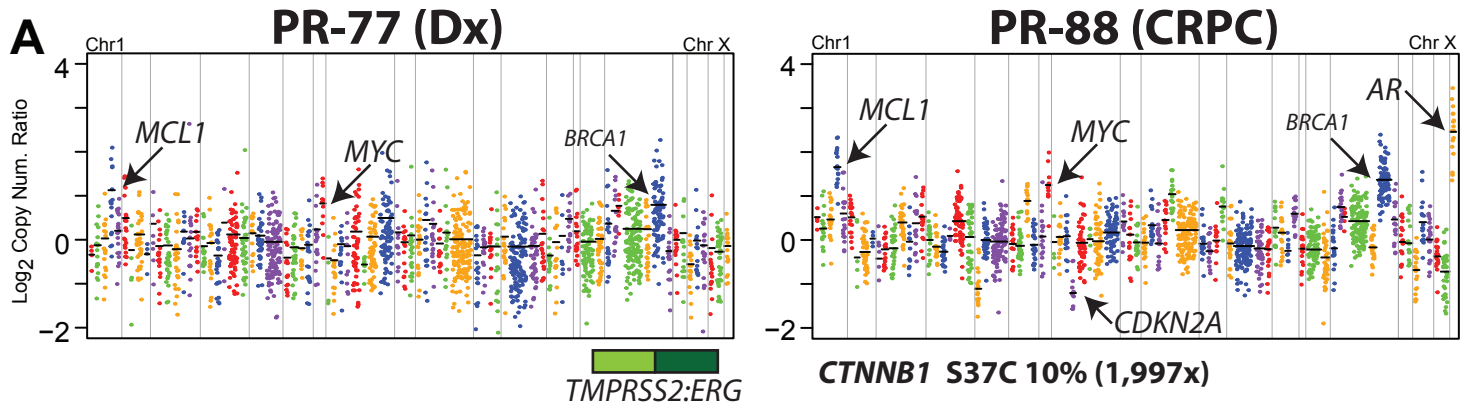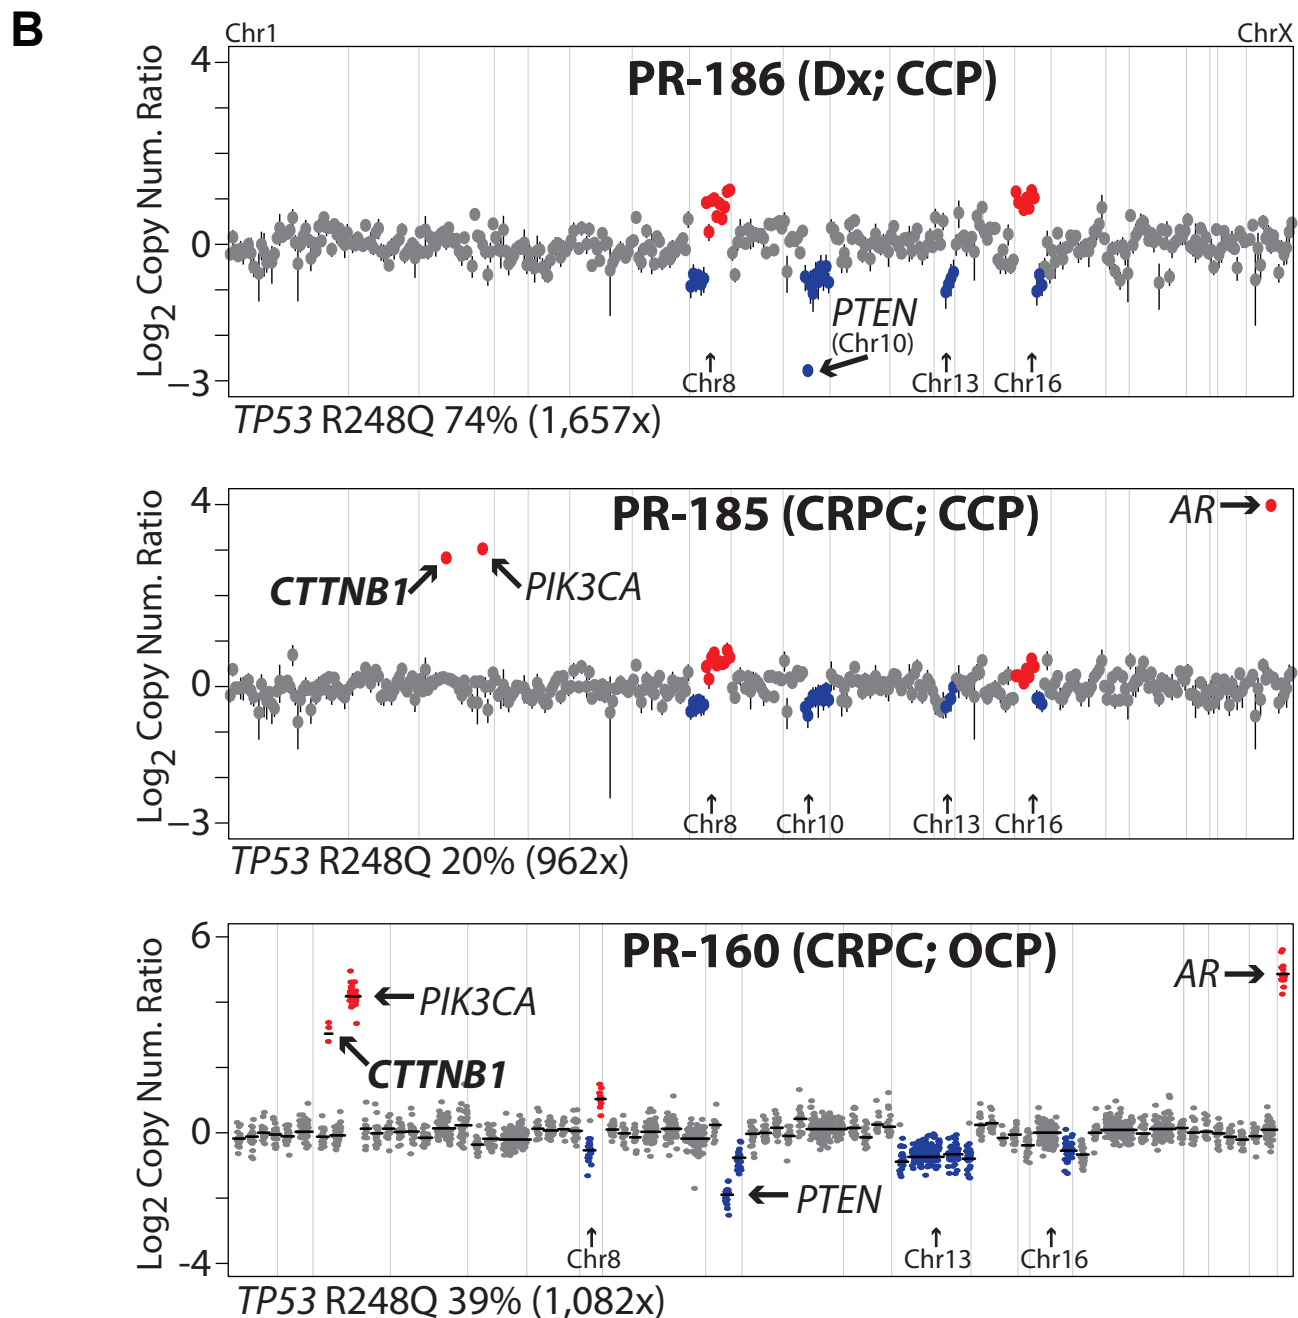

Figure S8

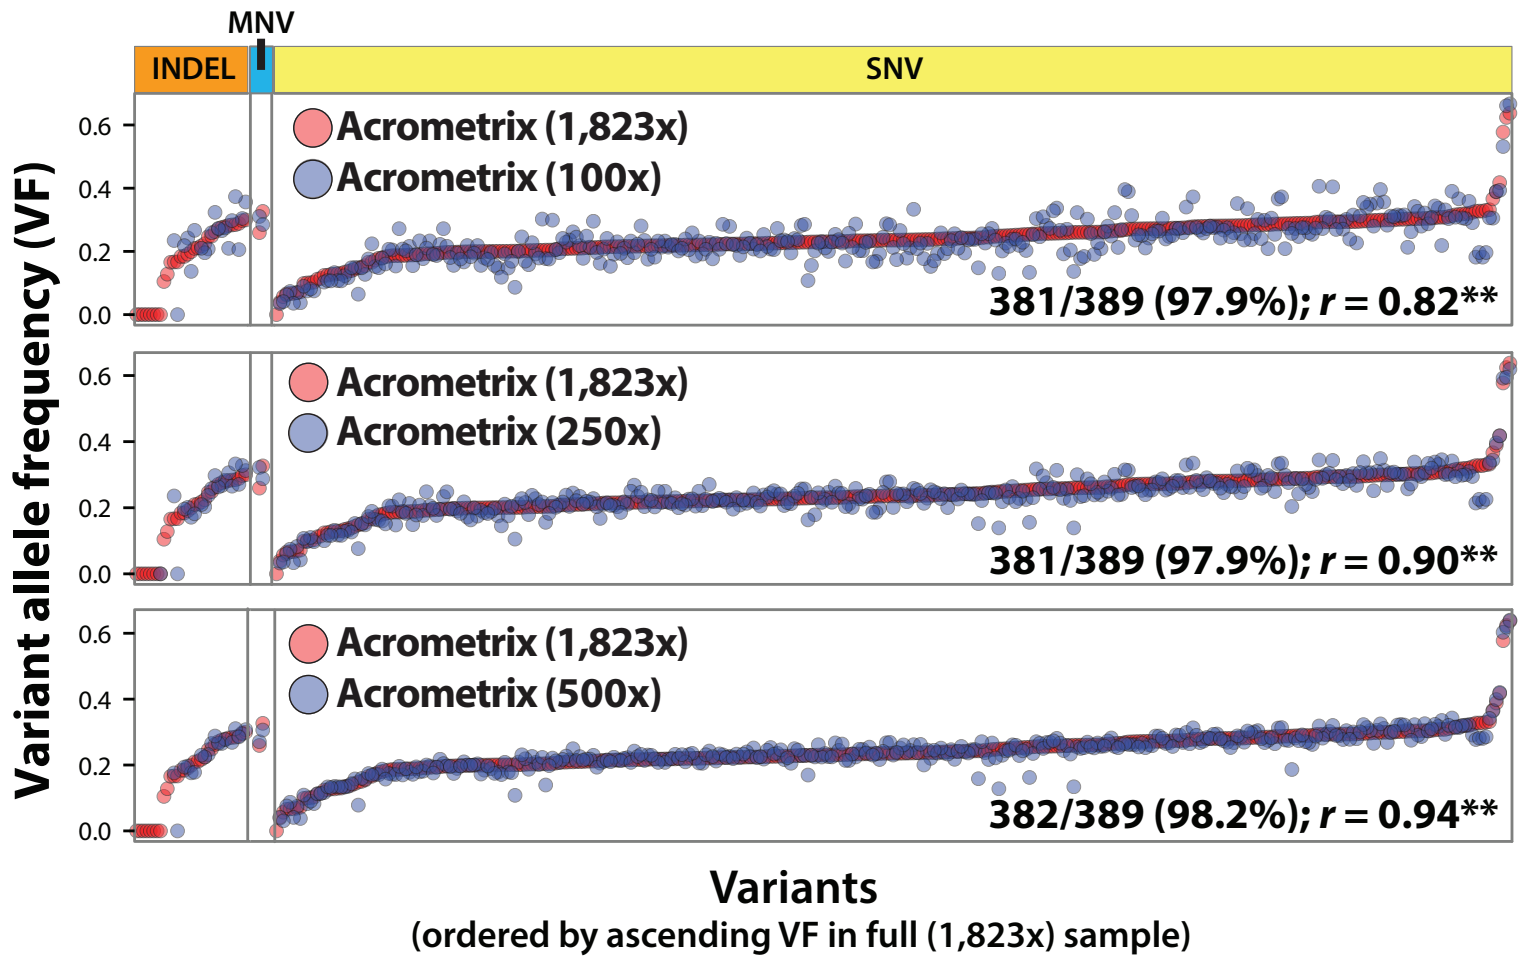

**Table S1: OncoPrint Cancer Research Panel (OCP)**

| Gene           | Chromosome | Amplicon Inclusion | Category         | Panel      | v0.9a Amplicons | v0.9b Amplicons |
|----------------|------------|--------------------|------------------|------------|-----------------|-----------------|
| <i>ABL1</i>    | chr9       | hs                 | Oncogene         | both       | 7               | 8               |
| <i>ACVRL1</i>  | chr12      | cnv                | Oncogene         | both       | 18              | 17              |
| <i>AKT1</i>    | chr14      | cnv hs             | Oncogene         | both       | 20              | 18              |
| <i>ALK</i>     | chr2       | hs                 | Oncogene         | both       | 2               | 5               |
| <i>APC</i>     | chr5       | cds                | Tumor Suppressor | both       | 118             | 117             |
| <i>APEX1</i>   | chr14      | cnv                | Oncogene         | both       | 15              | 15              |
| <i>AR</i>      | chrX       | cnv hs             | Oncogene         | both       | 17              | 16              |
| <i>ARAF</i>    | chrX       | hs                 | Oncogene         | v0.9b only | 0               | 1               |
| <i>ATM</i>     | chr11      | cds                | Tumor Suppressor | both       | 161             | 157             |
| <i>ATP11B</i>  | chr3       | cnv                | Oncogene         | both       | 17              | 15              |
| <i>BAP1</i>    | chr3       | cds                | Tumor Suppressor | both       | 34              | 34              |
| <i>BCL2L1</i>  | chr20      | cnv                | Oncogene         | both       | 18              | 18              |
| <i>BCL9</i>    | chr1       | cnv                | Oncogene         | both       | 19              | 19              |
| <i>BIRC2</i>   | chr11      | cnv                | Oncogene         | both       | 20              | 16              |
| <i>BIRC3</i>   | chr11      | cnv                | Oncogene         | both       | 18              | 15              |
| <i>BRAF</i>    | chr7       | hs                 | Oncogene         | both       | 3               | 3               |
| <i>BRCA1</i>   | chr17      | cds                | Tumor Suppressor | both       | 89              | 91              |
| <i>BRCA2</i>   | chr13      | cds                | Tumor Suppressor | both       | 137             | 137             |
| <i>BTK</i>     | chrX       | hs                 | Oncogene         | both       | 1               | 1               |
| <i>CBL</i>     | chr11      | hs                 | Oncogene         | both       | 3               | 3               |
| <i>CCND1</i>   | chr11      | cnv                | Oncogene         | both       | 19              | 19              |
| <i>CCNE1</i>   | chr19      | cnv                | Oncogene         | both       | 18              | 16              |
| <i>CD274</i>   | chr9       | cnv                | Oncogene         | both       | 19              | 35              |
| <i>CD44</i>    | chr11      | cnv                | Oncogene         | both       | 19              | 19              |
| <i>CDH1</i>    | chr16      | cds                | Tumor Suppressor | both       | 39              | 39              |
| <i>CDK4</i>    | chr12      | cnv hs             | Oncogene         | both       | 15              | 15              |
| <i>CDK6</i>    | chr7       | cnv                | Oncogene         | both       | 16              | 15              |
| <i>CDKN2A</i>  | chr9       | cds                | Tumor Suppressor | both       | 13              | 12              |
| <i>CHEK2</i>   | chr22      | hs                 | Oncogene         | both       | 2               | 2               |
| <i>CSF1R</i>   | chr5       | hs                 | Oncogene         | both       | 3               | 3               |
| <i>CSNK2A1</i> | chr20      | cnv                | Oncogene         | both       | 19              | 19              |
| <i>CTNNB1</i>  | chr3       | hs                 | Oncogene         | both       | 3               | 13              |
| <i>DCUN1D1</i> | chr3       | cnv                | Oncogene         | both       | 19              | 14              |
| <i>DDR2</i>    | chr1       | hs                 | Oncogene         | v0.9b only | 0               | 8               |
| <i>DNMT3A</i>  | chr2       | hs                 | Oncogene         | both       | 5               | 5               |
| <i>EGFR</i>    | chr7       | cnv hs             | Oncogene         | both       | 31              | 33              |
| <i>ERBB2</i>   | chr17      | cnv hs             | Oncogene         | both       | 25              | 27              |
| <i>ERBB3</i>   | chr12      | hs                 | Oncogene         | both       | 2               | 2               |
| <i>ERBB4</i>   | chr2       | hs                 | Oncogene         | both       | 3               | 11              |
| <i>ESR1</i>    | chr6       | hs                 | Oncogene         | both       | 3               | 3               |
| <i>EZH2</i>    | chr7       | hs                 | Oncogene         | both       | 2               | 2               |
| <i>FBXW7</i>   | chr4       | cds                | Tumor Suppressor | both       | 41              | 39              |
| <i>FGFR1</i>   | chr8       | cnv hs             | Oncogene         | both       | 19              | 21              |
| <i>FGFR2</i>   | chr10      | cnv hs             | Oncogene         | both       | 21              | 22              |
| <i>FGFR3</i>   | chr4       | cnv hs             | Oncogene         | both       | 20              | 20              |
| <i>FGFR4</i>   | chr5       | cnv                | Oncogene         | v0.9b only | 0               | 19              |
| <i>FLT3</i>    | chr13      | cnv hs             | Oncogene         | both       | 22              | 24              |
| <i>FOXL2</i>   | chr3       | hs                 | Oncogene         | both       | 1               | 1               |
| <i>GAS6</i>    | chr13      | cnv                | Oncogene         | both       | 22              | 22              |
| <i>GATA2</i>   | chr3       | hs                 | Oncogene         | both       | 2               | 2               |
| <i>GATA3</i>   | chr10      | cds                | Tumor Suppressor | both       | 17              | 17              |
| <i>GNA11</i>   | chr19      | hs                 | Oncogene         | both       | 1               | 1               |
| <i>GNAQ</i>    | chr9       | hs                 | Oncogene         | both       | 2               | 2               |

| Gene     | Chromosome | Amplicon Inclusion | Category         | Panel      | v0.9a Amplicons | v0.9b Amplicons |
|----------|------------|--------------------|------------------|------------|-----------------|-----------------|
| GNAS     | chr20      | hs                 | Oncogene         | both       | 2               | 2               |
| HNF1A    | chr12      | hs                 | Oncogene         | v0.9b only | 0               | 2               |
| HRAS     | chr11      | hs                 | Oncogene         | both       | 2               | 2               |
| IDH1     | chr2       | hs                 | Oncogene         | both       | 3               | 3               |
| IDH2     | chr15      | hs                 | Oncogene         | both       | 2               | 1               |
| IFITM1   | chr11      | hs                 | Oncogene         | both       | 1               | 1               |
| IFITM3   | chr11      | hs                 | Oncogene         | both       | 1               | 1               |
| IGF1R    | chr15      | cnv                | Oncogene         | both       | 19              | 19              |
| IL6      | chr7       | cnv                | Oncogene         | both       | 17              | 17              |
| JAK1     | chr1       | hs                 | Oncogene         | both       | 2               | 2               |
| JAK2     | chr9       | hs                 | Oncogene         | both       | 4               | 5               |
| JAK3     | chr19      | hs                 | Oncogene         | both       | 2               | 5               |
| KDR      | chr4       | hs                 | Oncogene         | both       | 4               | 13              |
| KIT      | chr4       | cnv hs             | Oncogene         | both       | 27              | 31              |
| KNSTRN   | chr15      | hs                 | Oncogene         | both       | 1               | 1               |
| KRAS     | chr12      | cnv hs             | Oncogene         | both       | 23              | 14              |
| MAGOH    | chr1       | hs                 | Oncogene         | both       | 1               | 1               |
| MAP2K1   | chr15      | hs                 | Oncogene         | both       | 3               | 3               |
| MAP2K2   | chr19      | hs                 | Oncogene         | v0.9b only | 0               | 1               |
| MAPK1    | chr22      | hs                 | Oncogene         | both       | 1               | 1               |
| MAX      | chr14      | hs                 | Oncogene         | both       | 2               | 2               |
| MCL1     | chr1       | cnv                | Oncogene         | both       | 17              | 17              |
| MDM2     | chr12      | cnv                | Oncogene         | both       | 19              | 14              |
| MDM4     | chr1       | cnv                | Oncogene         | both       | 20              | 20              |
| MED12    | chrX       | hs                 | Oncogene         | both       | 1               | 3               |
| MET      | chr7       | cnv hs             | Oncogene         | both       | 24              | 25              |
| MPL      | chr1       | hs                 | Oncogene         | v0.9a only | 1               | 0               |
| MLH1     | chr3       | hs                 | Oncogene         | v0.9b only | 0               | 1               |
| MPL      | chr1       | hs                 | Oncogene         | v0.9b only | 0               | 1               |
| MSH2     | chr2       | cds                | Tumor Suppressor | both       | 47              | 46              |
| MTOR     | chr1       | hs                 | Oncogene         | both       | 4               | 4               |
| MYC      | chr8       | cnv                | Oncogene         | both       | 11              | 11              |
| MYCL     | chr1       | cnv                | Oncogene         | both       | 18              | 18              |
| MYCN     | chr2       | cnv                | Oncogene         | both       | 22              | 20              |
| MYD88    | chr3       | hs                 | Oncogene         | both       | 3               | 3               |
| MYO18A   | chr17      | cnv                | Oncogene         | both       | 17              | 16              |
| NF1      | chr17      | cds                | Tumor Suppressor | both       | 136             | 138             |
| NF2      | chr22      | cds                | Tumor Suppressor | both       | 38              | 38              |
| NFE2L2   | chr2       | hs                 | Oncogene         | both       | 2               | 2               |
| NKX2-1   | chr14      | cnv                | Oncogene         | both       | 10              | 7               |
| NKX2-8   | chr14      | cnv                | Oncogene         | both       | 3               | 3               |
| NOTCH1   | chr9       | cds                | Tumor Suppressor | both       | 100             | 103             |
| NPM1     | chr5       | hs                 | Oncogene         | v0.9b only | 0               | 1               |
| NRAS     | chr1       | hs                 | Oncogene         | both       | 2               | 4               |
| PAX5     | chr9       | hs                 | Oncogene         | both       | 1               | 1               |
| PDCD1LG2 | chr9       | cnv                | Oncogene         | both       | 18              | 17              |
| PDGFRA   | chr4       | cnv hs             | Oncogene         | both       | 21              | 22              |
| PIK3CA   | chr3       | cnv hs             | Oncogene         | both       | 34              | 36              |
| PIK3R1   | chr5       | cds                | Tumor Suppressor | both       | 39              | 39              |
| PNP      | chr14      | cnv                | Oncogene         | both       | 18              | 18              |
| PPARG    | chr3       | cnv                | Oncogene         | both       | 19              | 17              |
| PPP2R1A  | chr19      | hs                 | Oncogene         | both       | 2               | 2               |
| PTCH1    | chr9       | cds                | Tumor Suppressor | both       | 55              | 67              |
| PTEN     | chr10      | cds                | Tumor Suppressor | both       | 18              | 20              |
| PTPN11   | chr12      | hs                 | Oncogene         | both       | 3               | 3               |
| RAC1     | chr7       | hs                 | Oncogene         | both       | 1               | 1               |

| Gene           | Chromosome | Amplicon Inclusion | Category         | Panel      | v0.9a Amplicons | v0.9b Amplicons |
|----------------|------------|--------------------|------------------|------------|-----------------|-----------------|
| <i>RAF1</i>    | chr3       | hs                 | Oncogene         | both       | 1               | 1               |
| <i>RB1</i>     | chr13      | cds                | Tumor Suppressor | both       | 54              | 54              |
| <i>RET</i>     | chr10      | hs                 | Oncogene         | both       | 3               | 5               |
| <i>RHEB</i>    | chr7       | hs                 | Oncogene         | both       | 1               | 1               |
| <i>RHOA</i>    | chr3       | hs                 | Oncogene         | both       | 1               | 1               |
| <i>RPS6KB1</i> | chr17      | cnv                | Oncogene         | both       | 18              | 18              |
| <i>SF3B1</i>   | chr2       | hs                 | Oncogene         | both       | 4               | 4               |
| <i>SMAD4</i>   | chr18      | cds                | Tumor Suppressor | v0.9b only | 0               | 9               |
| <i>SMARCB1</i> | chr22      | cds                | Tumor Suppressor | both       | 20              | 20              |
| <i>SMO</i>     | chr7       | hs                 | Oncogene         | both       | 2               | 6               |
| <i>SOX2</i>    | chr3       | cnv                | Oncogene         | both       | 12              | 38              |
| <i>SPOP</i>    | chr17      | hs                 | Oncogene         | both       | 1               | 1               |
| <i>SRC</i>     | chr20      | hs                 | Oncogene         | both       | 1               | 2               |
| <i>STAT3</i>   | chr17      | hs                 | Oncogene         | both       | 1               | 1               |
| <i>STK11</i>   | chr19      | cds                | Tumor Suppressor | both       | 21              | 22              |
| <i>TERT</i>    | chr5       | cnv                | Oncogene         | both       | 18              | 15              |
| <i>TET2</i>    | chr4       | cds                | Tumor Suppressor | both       | 71              | 71              |
| <i>TIAF1</i>   | chr17      | cnv                | Tumor Suppressor | both       | 6               | 22              |
| <i>TP53</i>    | chr17      | cds                | Tumor Suppressor | both       | 20              | 24              |
| <i>TSC1</i>    | chr9       | cds                | Tumor Suppressor | both       | 57              | 57              |
| <i>TSC2</i>    | chr16      | cds                | Tumor Suppressor | both       | 94              | 94              |
| <i>U2AF1</i>   | chr21      | hs                 | Oncogene         | both       | 2               | 2               |
| <i>VHL</i>     | chr3       | cds                | Tumor Suppressor | both       | 8               | 8               |
| <i>WT1</i>     | chr11      | cds                | Tumor Suppressor | both       | 25              | 24              |
| <i>XPO1</i>    | chr2       | hs                 | Oncogene         | both       | 1               | 1               |
| <i>ZNF217</i>  | chr20      | cnv                | Oncogene         | both       | 19              | 18              |

List of genes included on OncoPrint Cancer Research Panel (OCP) v0.9a and v0.9b. Amplicon prioritization for each gene is provided (cds: full coding sequence; cnv: copy number analysis; hs: hotspots). Gene category (tumor suppressor / oncogene) is provided. Panel indicates whether amplicons for a given gene were included in OCP v0.9a, v0.9b, or both panel versions. The number of amplicons present in each version of panel for each gene is provided.

**Table S2: Clinicopathological and sequencing statistics for molecular (MO) cohort**

| Sample ID | Age   | Sex | Site           | Cancer Type | Tumor Content | DNA          |                        |                      |                            |                            | RNA                          |                             | ALK 3/5' Imbalance Ratio | ROS1 3/5' Imbalance Ratio | Total variant calls | DNA Analysis | RNA Analysis   |                           |
|-----------|-------|-----|----------------|-------------|---------------|--------------|------------------------|----------------------|----------------------------|----------------------------|------------------------------|-----------------------------|--------------------------|---------------------------|---------------------|--------------|----------------|---------------------------|
|           |       |     |                |             |               | Mapped Reads | Mapped reads on target | Base coverage (mean) | Base coverage (uniformity) | Target base coverage at 1x | Target base coverage at 100x | Mapped RNASeq Reads (Total) |                          |                           |                     |              |                | Reads (Housekeeping Only) |
| MO-1      | 56-70 | F   | Colon          | COAD        | 60%           | 6,408,425    | 97.0%                  | 2,391                | 90.0%                      | 93.7%                      | 92.9%                        | 71,960                      | 70,441                   | 0.0000                    | 0.0000              | 236          | Included       | Included                  |
| MO-2      | 56-70 | F   | Lung           | LUAD        | 25%           | 5,540,871    | 97.1%                  | 2,039                | 89.3%                      | 93.7%                      | 92.6%                        | 731,426                     | 176,669                  | 0.0052                    | -0.0524             | 191          | Included       | Included                  |
| MO-3      | >70   | F   | Skin           | MEL         | 40%           | 6,999,976    | 97.4%                  | 2,603                | 77.8%                      | 93.7%                      | 91.6%                        | 5,675                       | 5,675                    | 0.0062                    | 0.0000              | 190          | Included       | Included                  |
| MO-4      | <56   | F   | Skin           | MEL         | 60%           | 4,622,205    | 96.2%                  | 1,728                | 90.0%                      | 93.7%                      | 92.6%                        | 799,214                     | 793,730                  | 0.0041                    | 0.0000              | 211          | Included       | Included                  |
| MO-5      | 56-70 | M   | Lymph Node*    | MEL         | 70%           | 6,347,829    | 96.2%                  | 2,275                | 89.5%                      | 93.7%                      | 93.3%                        | 55,391                      | 51,536                   | -0.0453                   | 0.0000              | 209          | Included       | Included                  |
| MO-6      | 56-70 | F   | Liver*         | COAD        | 60%           | 5,826,554    | 97.0%                  | 2,140                | 88.3%                      | 93.7%                      | 92.5%                        | 529                         | 529                      | 0.0000                    | 0.0000              | 182          | Included       | Included                  |
| MO-7      | >70   | F   | Skin           | MEL         | 15%           | 4,969,020    | 98.0%                  | 1,855                | 84.0%                      | 94.0%                      | 92.7%                        | 277,102                     | 266,076                  | -0.0126                   | -0.0064             | 190          | Included       | Included                  |
| MO-8      | 56-70 | F   | Skin           | MEL         | 75%           | 6,355,598    | 97.6%                  | 2,368                | 86.7%                      | 93.7%                      | 92.2%                        | 105,649                     | 96,879                   | -0.0724                   | -0.0052             | 205          | Included       | Included                  |
| MO-9      | 56-70 | M   | Soft tissue*   | MEL         | 75%           | 5,210,463    | 95.9%                  | 1,913                | 91.0%                      | 93.7%                      | 93.0%                        | 426,202                     | 412,382                  | -0.0050                   | -0.0111             | 281          | Included       | Included                  |
| MO-10     | >70   | M   | Skin           | MEL         | 60%           | 5,166,372    | 96.7%                  | 1,927                | 90.3%                      | 93.7%                      | 92.7%                        | 684,081                     | 635,622                  | -0.0351                   | 0.0001              | 206          | Included       | Included                  |
| MO-11     | >70   | M   | Skin           | MEL         | 75%           | 5,341,700    | 96.0%                  | 1,888                | 87.7%                      | 93.7%                      | 92.2%                        | 301,850                     | 232,685                  | -0.2440                   | 0.0000              | 213          | Included       | Included                  |
| MO-12     | 56-70 | M   | Colon          | COAD        | 50%           | 3,456,985    | 94.8%                  | 1,214                | 88.5%                      | 93.7%                      | 92.3%                        | 557,799                     | 551,440                  | 0.0000                    | -0.0023             | 233          | Included       | Included                  |
| MO-13     | >70   | F   | Colon          | COAD        | 40%           | 4,655,334    | 96.3%                  | 1,721                | 90.1%                      | 93.7%                      | 92.7%                        | 860,882                     | 790,326                  | -0.0020                   | -0.0020             | 206          | Included       | Included                  |
| MO-14     | >70   | M   | Colon          | COAD        | 40%           | 5,768,577    | 97.7%                  | 2,195                | 88.8%                      | 93.7%                      | 92.7%                        | 1,195,737                   | 1,181,677                | 0.0000                    | 0.0000              | 170          | Included       | Included                  |
| MO-15     | 56-70 | F   | Lung*          | MEL         | 50%           | 4,558,899    | 97.7%                  | 1,709                | 90.1%                      | 93.6%                      | 92.7%                        | 152,914                     | 126,357                  | -0.0393                   | -0.0550             | 165          | Included       | Included                  |
| MO-16     | 56-70 | F   | Lung*          | COAD        | 40%           | 5,144,949    | 97.2%                  | 1,916                | 87.4%                      | 93.7%                      | 92.7%                        | 74,404                      | 29,937                   | 0.0009                    | 0.1420              | 165          | Included       | Included                  |
| MO-17     | 56-70 | M   | Soft tissue*   | MEL         | 70%           | 4,604,088    | 95.9%                  | 1,695                | 89.8%                      | 93.7%                      | 92.5%                        | 492,417                     | 468,918                  | -0.0169                   | 0.0000              | 191          | Included       | Included                  |
| MO-18     | >70   | M   | Skin           | MEL         | 60%           | 5,617,992    | 97.0%                  | 2,089                | 88.0%                      | 93.7%                      | 92.6%                        | 406,821                     | 387,605                  | -0.0192                   | 0.0002              | 215          | Included       | Included                  |
| MO-19     | 56-70 | M   | Skin           | MEL         | 30%           | 4,489,741    | 97.1%                  | 1,681                | 75.5%                      | 93.7%                      | 89.7%                        | 1,978,927                   | 1,839,608                | -0.0599                   | -0.0010             | 196          | Included       | Included                  |
| MO-20     | <56   | M   | Liver*         | LUAD        | 60%           | 6,203,158    | 96.9%                  | 2,277                | 88.4%                      | 93.7%                      | 93.1%                        | 406,613                     | 401,216                  | 0.0002                    | -0.0054             | 189          | Included       | Included                  |
| MO-21     | <56   | M   | Liver*         | COAD        | 20%           | 5,311,860    | 95.5%                  | 1,935                | 88.7%                      | 93.7%                      | 92.9%                        | 265,194                     | 263,081                  | 0.0005                    | -0.0027             | 168          | Included       | Included                  |
| MO-22     | >70   | M   | Colon          | COAD        | 40%           | 5,894,637    | 96.4%                  | 2,162                | 89.8%                      | 93.7%                      | 93.0%                        | 153,253                     | 144,885                  | 0.0000                    | 0.0000              | 166          | Included       | Included                  |
| MO-23     | >70   | M   | Colon          | COAD        | 50%           | 4,318,746    | 94.9%                  | 1,498                | 88.3%                      | 93.7%                      | 92.7%                        | 337,903                     | 314,719                  | 0.0002                    | -0.0272             | 237          | Included       | Included                  |
| MO-24     | 56-70 | F   | Lung*          | COAD        | 40%           | 5,234,676    | 96.2%                  | 1,913                | 89.6%                      | 93.7%                      | 92.8%                        | 533,484                     | 389,765                  | 0.0004                    | 0.0120              | 182          | Included       | Included                  |
| MO-25     | 56-70 | M   | Soft tissue    | O           | 40%           | 4,079,262    | 95.9%                  | 1,425                | 87.2%                      | 93.7%                      | 92.1%                        | 556,415                     | 123,162                  | -0.0663                   | -0.5600             | 216          | Included       | Included                  |
| MO-26     | <56   | F   | Uterus         | O           | 60%           | 4,762,314    | 96.1%                  | 1,766                | 91.0%                      | 93.7%                      | 93.0%                        | 262,435                     | 250,928                  | -0.0013                   | 0.0016              | 188          | Included       | Included                  |
| MO-27     | >70   | F   | Skin           | MEL         | 75%           | 4,961,900    | 97.7%                  | 1,873                | 86.7%                      | 93.7%                      | 92.0%                        | 352,936                     | 306,373                  | -0.1170                   | 0.0000              | 176          | Included       | Included                  |
| MO-28     | >70   | F   | Lymph Node*,#  | MEL         | 90%           | 4,482,772    | 97.4%                  | 1,659                | 76.3%                      | 93.7%                      | 90.7%                        | 44,674                      | 43,310                   | 0.0091                    | 0.0000              | 165          | Included       | Included                  |
| MO-29     | 56-70 | F   | Lymph Node*,#  | LUAD        | 20%           | 2,766,826    | 97.0%                  | 1,049                | 74.1%                      | 93.7%                      | 85.6%                        | 728,483                     | 462,316                  | -0.0086                   | -0.0681             | 183          | Included       | Included                  |
| MO-30     | <56   | M   | Lymph Node*    | MEL         | 50%           | 5,981,073    | 95.5%                  | 2,155                | 90.3%                      | 93.7%                      | 93.0%                        | 102,601                     | 101,781                  | 0.0015                    | 0.0000              | 203          | Included       | Included                  |
| MO-31     | <56   | M   | Brain*         | MEL         | 70%           | 3,906,653    | 96.7%                  | 1,456                | 89.9%                      | 93.7%                      | 92.5%                        | 713,067                     | 699,617                  | -0.0159                   | 0.0000              | 214          | Included       | Included                  |
| MO-32     | >70   | F   | Lymph Node*,#  | LUAD        | 10%           | 4,284,724    | 95.2%                  | 1,552                | 88.0%                      | 93.6%                      | 91.6%                        | 49,474                      | 38,871                   | 0.0010                    | -0.0498             | 156          | Included       | Included                  |
| MO-33     | 56-70 | M   | Lung           | LUAD        | 20%           | 4,873,422    | 96.2%                  | 1,752                | 90.9%                      | 93.7%                      | 93.1%                        | 204,991                     | 117,938                  | 0.0000                    | -0.1890             | 238          | Included       | Included                  |
| MO-34     | >70   | F   | Colon          | COAD        | 60%           | 4,278,747    | 95.8%                  | 1,503                | 91.0%                      | 93.7%                      | 93.1%                        | 395,690                     | 364,309                  | -0.0045                   | -0.0001             | 220          | Included       | Included                  |
| MO-35     | >70   | F   | Colon          | COAD        | 80%           | 3,645,338    | 97.6%                  | 1,386                | 90.7%                      | 93.7%                      | 92.6%                        | 525,219                     | 373,342                  | -0.0012                   | -0.0046             | 215          | Included       | Included                  |
| MO-36     | >70   | M   | Liver*         | MEL         | 80%           | 6,178,509    | 97.5%                  | 2,312                | 90.1%                      | 93.7%                      | 93.1%                        | 6,247                       | 5,818                    | -0.0375                   | 0.0000              | 189          | Included       | Included                  |
| MO-37     | <56   | M   | Skin           | MEL         | 40%           | 3,841,287    | 97.1%                  | 1,465                | 90.4%                      | 93.7%                      | 92.6%                        | 770,968                     | 759,306                  | -0.0037                   | -0.0020             | 184          | Included       | Included                  |
| MO-38     | >70   | F   | Colon          | COAD        | 75%           | 2,793,508    | 96.2%                  | 990                  | 90.4%                      | 93.7%                      | 92.1%                        | 480,170                     | 468,606                  | 0.0001                    | -0.0013             | 187          | Included       | Included                  |
| MO-39     | <56   | M   | Liver*         | COAD        | 40%           | 3,986,710    | 97.1%                  | 1,499                | 90.0%                      | 93.7%                      | 92.7%                        | 133,474                     | 132,219                  | 0.0008                    | 0.0000              | 166          | Included       | Included                  |
| MO-40     | >70   | M   | Brain*         | MEL         | 40%           | 4,890,160    | 96.6%                  | 1,819                | 88.3%                      | 93.7%                      | 92.7%                        | 115,004                     | 109,850                  | -0.0283                   | 0.0000              | 202          | Included       | Included                  |
| MO-41     | >70   | M   | Lung           | LUAD        | 25%           | 4,620,847    | 97.6%                  | 1,741                | 90.2%                      | 93.7%                      | 92.6%                        | 40,946                      | 16,404                   | 0.0000                    | -0.0504             | 169          | Included       | Included                  |
| MO-42     | 56-70 | M   | Skin           | MEL         | 15%           | 5,384,468    | 96.1%                  | 1,788                | 89.5%                      | 93.7%                      | 92.5%                        | 1,303                       | 1,300                    | 0.0000                    | 0.0015              | 297          | Included       | Included                  |
| MO-43     | 56-70 | F   | Soft tissue*   | MEL         | 60%           | 5,795,092    | 97.4%                  | 2,187                | 89.9%                      | 93.7%                      | 92.7%                        | N/S                         | N/S                      | N/S                       | N/S                 | 198          | Included       | N/S                       |
| MO-44     | 56-70 | F   | Skin           | MEL         | 20%           | 2,810,251    | 96.9%                  | 1,005                | 87.9%                      | 93.7%                      | 91.2%                        | 10,398                      | 9,796                    | -0.0454                   | 0.0000              | 220          | Included       | Included                  |
| MO-45     | >70   | M   | Peritoneum*,^  | O           | 30%           | 4,908,881    | 97.4%                  | 1,837                | 90.2%                      | 93.7%                      | 92.7%                        | 308,174                     | 299,396                  | -0.0028                   | -0.0015             | 214          | Included       | Included                  |
| MO-46     | <56   | F   | Lymph Node*    | LUAD        | 30%           | 3,006,771    | 88.7%                  | 834                  | 77.2%                      | 93.6%                      | 85.9%                        | 60,746                      | 53,886                   | 0.0024                    | -0.0442             | 213          | Excl.(CN only) | Included                  |
| MO-47     | >70   | M   | Colon          | COAD        | 60%           | 4,998,555    | 97.4%                  | 1,863                | 88.8%                      | 93.7%                      | 92.5%                        | 821,988                     | 819,983                  | 0.0000                    | 0.0000              | 185          | Included       | Included                  |
| MO-48     | >70   | F   | Lung#          | LUAD        | 30%           | 5,487,563    | 96.4%                  | 1,978                | 89.2%                      | 93.7%                      | 92.8%                        | 34,806                      | 30,310                   | -0.0455                   | -0.0630             | 190          | Included       | Included                  |
| MO-49     | <56   | M   | Lung           | LUAD        | 20%           | 3,964,828    | 97.0%                  | 1,438                | 89.6%                      | 93.6%                      | 92.3%                        | 1,347,945                   | 618,650                  | -0.0011                   | -0.1810             | 185          | Included       | Included                  |
| MO-50     | 56-70 | F   | Brain*         | COAD        | 50%           | 4,846,318    | 96.0%                  | 1,767                | 88.6%                      | 93.7%                      | 92.8%                        | 504,983                     | 488,402                  | -0.0045                   | 0.0012              | 183          | Included       | Included                  |
| MO-51     | 56-70 | F   | Colon          | COAD        | 40%           | 5,511,714    | 96.7%                  | 2,032                | 89.1%                      | 93.7%                      | 92.7%                        | 123,532                     | 121,951                  | 0.0004                    | 0.0000              | 223          | Included       | Included                  |
| MO-52     | >70   | M   | Colon          | COAD        | 15%           | 4,254,693    | 97.3%                  | 1,624                | 75.6%                      | 93.7%                      | 89.6%                        | 2,334,499                   | 2,202,407                | -0.0007                   | -0.0201             | 206          | Included       | Included                  |
| MO-53     | 56-70 | M   | Brain*         | LUAD        | 40%           | 6,532,031    | 97.1%                  | 2,441                | 81.8%                      | 93.7%                      | 92.3%                        | N/S                         | N/S                      | N/S                       | N/S                 | 216          | Included       | N/S                       |
| MO-54     | 56-70 | F   | Pleural Fluid# | LUAD        | 70%           | 5,797,903    | 96.9%                  | 2,109                | 87.6%                      | 93.7%                      | 92.6%                        | 263,151                     | 262,145                  | -0.0016                   | -0.0013             | 207          | Included       | Included                  |
| MO-55     | <56   | M   | Lymph Node*,&  | MEL         | 40%           | 4,517,449    | 96.2%                  | 1,655                | 87.2%                      | 93.7%                      | 91.8%                        | 335,087                     | 330,028                  | 0.0044                    | 0.0000              | 191          | Included       | Included                  |
| MO-56     | <56   | F   | Colon          | COAD        | 40%           | 5,202,424    | 97.8%                  | 1,982                | 90.2%                      | 93.7%                      | 93.0%                        | 822,777                     | 809,520                  | -0.0019                   | -0.0019             | 203          | Included       | Included                  |
| MO-57     | 56-70 | F   | Lung#          | LUAD        | 30%           | 5,680,976    | 96.7%                  | 2,124                | 89.6%                      | 93.7%                      | 93.0%                        | 176,170                     | 101,333                  | 0.0004                    | -0.0385             | 205          | Included       | Included                  |
| MO-58     | <56   | F   | Brain*         | MEL         | 60%           | 4,418,727    | 97.7%                  | 1,642                | 87.8%                      | 93.7%                      | 92.4%                        | 76,085                      | 64,481                   | -0.0210                   | -0.0850             | 196          | Included       | Included                  |
| MO-59     | <56   | F   | Colon          | COAD        | 30%           | 3,732,906    | 95.5%                  | 1,352                | 89.3%                      | 93.7%                      | 92.6%                        | 357,084                     | 341,815                  | -0.0064                   | 0.0001              | 215          | Included       | Included                  |
| MO-60     | 56-70 | M   | Colon          | COAD        | 40%           | 3,315,306    | 84.0%                  | 1,052                | 90.7%                      | 93.7%                      | 92.4%                        | 347,204                     | 345,221                  | -0.0022                   | -0.0003             | 214          | Included       | Included                  |
| MO-61     | >70   | F   | Lymph Node*    | MEL         | 50%           | 4,566,394    | 96.8%                  | 1,716                | 90.3%                      | 93.7%                      | 92.9%                        | 440,285                     | 431,616                  | -0.0123                   | -0.0006             | 189          | Included       | Included                  |
| MO-62     | 56-70 | M   | Soft tissue*   | MEL         | 40%           | 4,454,484    | 96.8%                  | 1,655                | 89.4%                      | 93.7%                      | 92.6%                        | 494,698                     | 483,949                  | -0.0006                   | -0.0014             | 155          | Included       | Included                  |
| MO-63     | 56-70 | M   | Soft tissue*   | MEL         | 60%           | 4,432,587    | 97.0%                  | 1,636                | 90.0%                      | 93.7%                      | 92.6%                        | 56,665                      | 55,361                   | -0.0092                   | 0.0000              | 178          | Included       | Included                  |
| MO-64     | 56-70 | M   | Skin           | MEL         | 50%           | 5,098,967    | 95.6%                  | 1,843                | 89.1%                      | 93.7%                      | 92.6%                        | N/S                         | N/S                      | N/S                       | N/S                 | 197          | Included       | N/S                       |
| MO-65     | <56   | M   | Lung           | LUAD        | 30%           | 4,647,082    | 96.8%                  | 1,736                | 89.3%                      | 93.7%                      | 92.7%                        | 307,507                     | 264,634                  | 0.0007                    | -0.0018             | 177          | Included       | Included                  |
| MO-66     | 56-70 | M   | Lymph Node*    | LUAD        | 40%           | 2,940,685    | 96.2%                  | 1,131                | 90.6%                      | 99.9%                      | 97.1%                        | 801,823                     | 304,231                  | 0.0140                    | -0.1790             | 188          | Included       | Included                  |
| MO-67     | 56-70 | F   | Sinus*         | MEL         | 60%           | 5,726,732    | 95.0%                  | 1,895                | 89.6%                      | 93.7%                      | 92.6%                        | 309,399                     | 306,283                  | -0.0044                   | 0.0013              | 321          | Included       | Included                  |
| MO-68     | 56-70 | M   | Lymph Node*    | MEL         | 50%           | 4,992,388    | 97.1%                  | 1,659                | 83.3%                      | 93.6%                      | 91.4%                        | 908                         | 863                      | 0.0000                    | -0.0521             | 236          | Included       | Included                  |
| MO-69     | >70   | M   | Lung#          | LUAD        | 30%           | 3,859,380    | 95.8%                  | 1,325                | 89.0%                      | 93.7%                      | 92.4%                        | 225,693                     | 131,717                  | -0.0024                   | -0.0013             | 191          | Included       | Included                  |
| MO-70     | 56-70 | F   | Lymph Node*    | MEL         | 60%           | 5,377,814    | 96.8%                  | 1,904                | 88.8%                      | 93.7%                      | 9                            |                             |                          |                           |                     |              |                |                           |



| Sample ID | Age   | Sex | Site          | Cancer Type | Tumor Content | DNA          |                        |                      |                            |                            | RNA                          |                             | ALK 3'/5' Imbalance Ratio | ROS1 3'/5' Imbalance Ratio | Total variant calls | DNA Analysis | RNA Analysis |                                  |
|-----------|-------|-----|---------------|-------------|---------------|--------------|------------------------|----------------------|----------------------------|----------------------------|------------------------------|-----------------------------|---------------------------|----------------------------|---------------------|--------------|--------------|----------------------------------|
|           |       |     |               |             |               | Mapped Reads | Mapped reads on target | Base coverage (mean) | Base coverage (uniformity) | Target base coverage at 1x | Target base coverage at 100x | Mapped RNASeq Reads (Total) |                           |                            |                     |              |              | Mapped Reads (Housekeeping Only) |
| MO-73     | >70   | F   | Colon         | COAD        | 60%           | 3,424,383    | 96.4%                  | 1,250                | 89.8%                      | 93.7%                      | 92.2%                        | 796,497                     | 724,434                   | -0.0014                    | -0.0023             | 201          | Included     | Included                         |
| MO-74     | >70   | F   | Colon         | COAD        | 30%           | 5,231,167    | 97.1%                  | 1,958                | 87.3%                      | 93.7%                      | 93.0%                        | 216,042                     | 211,152                   | -0.0003                    | -0.0014             | 169          | Included     | Included                         |
| MO-75     | 56-70 | M   | Lymph Node*   | MEL         | 50%           | 4,559,628    | 95.3%                  | 1,688                | 89.9%                      | 93.7%                      | 92.9%                        | 372,466                     | 358,287                   | -0.0291                    | 0.0000              | 183          | Included     | Included                         |
| MO-76     | 56-70 | F   | Sinus         | MEL         | 20%           | 5,302,191    | 87.7%                  | 1,757                | 89.9%                      | 93.7%                      | 92.9%                        | 89,118                      | 85,739                    | -0.0138                    | 0.0000              | 177          | Included     | Included                         |
| MO-77     | 56-70 | M   | Lymph Node*   | LUAD        | 30%           | 5,628,061    | 95.8%                  | 2,060                | 90.3%                      | 93.7%                      | 93.2%                        | 198,134                     | 167,099                   | 0.0015                     | 0.0047              | 188          | Included     | Included                         |
| MO-78     | <56   | M   | Skin          | MEL         | 75%           | 6,256,008    | 96.7%                  | 2,258                | 88.5%                      | 93.7%                      | 93.1%                        | N/S                         | N/S                       | N/S                        | N/S                 | 207          | Included     | N/S                              |
| MO-79     | <56   | F   | Lymph Node*   | MEL         | 60%           | 5,200,029    | 97.5%                  | 1,971                | 89.7%                      | 93.7%                      | 92.7%                        | 715,840                     | 680,328                   | -0.0304                    | 0.0000              | 168          | Included     | Included                         |
| MO-80     | 56-70 | F   | Skim          | MEL         | 75%           | 4,189,129    | 97.2%                  | 1,557                | 90.3%                      | 93.7%                      | 90.9%                        | 156,022                     | 151,435                   | 0.0017                     | -0.0003             | 242          | Included     | Included                         |
| MO-81     | 56-70 | F   | Lung          | LUAD        | 30%           | 3,432,866    | 94.4%                  | 1,194                | 89.4%                      | 93.6%                      | 91.8%                        | 956,451                     | 187,841                   | 0.0019                     | -0.7830             | 233          | Included     | Included                         |
| MO-82     | <56   | F   | Lung          | LUAD        | 40%           | 4,433,915    | 95.1%                  | 1,563                | 90.2%                      | 93.7%                      | 92.8%                        | 667,405                     | 236,800                   | -0.0213                    | -0.5330             | 188          | Included     | Included                         |
| MO-83     | <56   | F   | Lung          | LUAD        | 40%           | 6,062,910    | 95.9%                  | 2,188                | 85.1%                      | 93.7%                      | 92.6%                        | 477                         | 158                       | 0.0000                     | 0.4370              | 192          | Included     | Included                         |
| MO-84     | >70   | M   | Lung*         | MEL         | 75%           | 5,969,428    | 96.5%                  | 2,169                | 90.7%                      | 93.7%                      | 93.2%                        | 327,869                     | 321,271                   | -0.0138                    | 0.0000              | 209          | Included     | Included                         |
| MO-85     | <56   | F   | Skin          | MEL         | 10%           | 5,801,276    | 95.4%                  | 2,081                | 90.4%                      | 93.7%                      | 93.1%                        | 47,456                      | 39,657                    | 0.0000                     | -0.0475             | 192          | Included     | Included                         |
| MO-86     | <56   | M   | Skin^         | MEL         | 50%           | 4,438,324    | 96.0%                  | 1,594                | 88.3%                      | 93.7%                      | 92.4%                        | 511,199                     | 404,735                   | -0.2120                    | 0.0000              | 198          | Included     | Included                         |
| MO-87     | 56-70 | M   | Adrenal*      | LUAD        | 20%           | 1,882,818    | 34.9%                  | 146                  | 63.7%                      | 83.0%                      | 40.5%                        | N/S                         | N/S                       | N/S                        | N/S                 | 338          | Excluded     | Excluded                         |
| MO-88     | <56   | F   | Colon         | COAD        | 30%           | 3,670,967    | 96.9%                  | 1,383                | 76.4%                      | 93.7%                      | 89.6%                        | 1,436,430                   | 1,401,021                 | -0.0020                    | -0.0105             | 193          | Included     | Included                         |
| MO-89     | >70   | F   | Lymph Node*   | MEL         | 60%           | 5,187,407    | 97.6%                  | 1,886                | 85.9%                      | 93.7%                      | 92.3%                        | 1,851                       | 1,532                     | -0.1100                    | 0.0000              | 195          | Included     | Included                         |
| MO-90     | 56-70 | M   | Skin          | MEL         | 15%           | 3,924,869    | 97.3%                  | 1,485                | 75.0%                      | 93.7%                      | 89.0%                        | 1,422,213                   | 1,174,494                 | -0.1680                    | -0.0005             | 169          | Included     | Included                         |
| MO-91     | <56   | F   | Liver*        | COAD        | 50%           | 4,850,257    | 97.2%                  | 1,801                | 85.2%                      | 93.6%                      | 92.3%                        | 855,448                     | 827,492                   | 0.0001                     | -0.0261             | 224          | Included     | Included                         |
| MO-92     | 56-70 | F   | Skin          | MEL         | 75%           | 2,841,073    | 90.4%                  | 737                  | 83.3%                      | 93.5%                      | 86.8%                        | 1,088,741                   | 681,158                   | -0.0022                    | -0.2290             | 818          | Included     | Included                         |
| MO-93     | 56-70 | M   | Lymph Node*,# | LUAD        | 20%           | 4,556,717    | 86.6%                  | 1,068                | 84.8%                      | 93.6%                      | 89.7%                        | 64,805                      | 56,765                    | 0.0000                     | 0.0000              | 688          | Included     | Included                         |
| MO-94     | 56-70 | F   | Peritoneum*,& | COAD        | 30%           | N/S          | N/S                    | N/S                  | N/S                        | N/S                        | N/S                          | N/S                         | N/S                       | N/S                        | N/S                 | N/S          | N/S          | N/S                              |
| MO-95     | >70   | F   | Lymph Node*,# | LUAD        | 40%           | 5,805,446    | 95.8%                  | 2,124                | 89.9%                      | 93.7%                      | 93.0%                        | 94,988                      | 47,337                    | 0.0006                     | -0.1920             | 212          | Included     | Included                         |
| MO-96     | >70   | F   | Colon         | COAD        | 60%           | 5,458,208    | 96.3%                  | 2,009                | 90.8%                      | 93.7%                      | 92.8%                        | 366,363                     | 346,118                   | 0.0000                     | -0.0263             | 214          | Included     | Included                         |
| MO-97     | 56-70 | M   | Chest Wall*   | MEL         | 70%           | 5,216,360    | 97.5%                  | 1,975                | 86.0%                      | 93.7%                      | 92.0%                        | 30,186                      | 29,162                    | -0.0045                    | 0.0000              | 186          | Included     | Included                         |
| MO-98     | <56   | F   | Lymph Node*   | MEL         | 75%           | 4,586,303    | 96.4%                  | 1,706                | 88.9%                      | 93.6%                      | 93.0%                        | 528,036                     | 481,409                   | -0.0721                    | -0.0001             | 193          | Included     | Included                         |
| MO-99     | 56-70 | M   | Lung*         | MEL         | 60%           | 4,896,472    | 96.3%                  | 1,820                | 90.5%                      | 93.6%                      | 92.9%                        | 43,710                      | 30,913                    | 0.0008                     | -0.0219             | 193          | Included     | Included                         |
| MO-100    | <56   | F   | Lymph Node*   | LUAD        | 60%           | 4,572,862    | 97.5%                  | 1,732                | 88.1%                      | 93.7%                      | 92.4%                        | 870,610                     | 125,471                   | 0.0130                     | -0.3810             | 178          | Included     | Included                         |
| MO-101    | 56-70 | M   | Colon         | COAD        | 30%           | 4,033,619    | 96.5%                  | 1,510                | 90.2%                      | 93.7%                      | 92.7%                        | 509,647                     | 498,996                   | -0.0007                    | -0.0034             | 206          | Included     | Included                         |
| MO-102    | <56   | F   | Lymph Node*,# | MEL         | 50%           | 4,537,141    | 97.6%                  | 1,703                | 89.5%                      | 93.7%                      | 92.8%                        | 235,473                     | 228,379                   | -0.0063                    | -0.0012             | 179          | Included     | Included                         |
| MO-103    | >70   | M   | Colon         | COAD        | 40%           | 3,667,000    | 97.1%                  | 1,390                | 88.2%                      | 93.7%                      | 92.2%                        | 984,211                     | 929,580                   | -0.0003                    | -0.0012             | 239          | Included     | Included                         |
| MO-104    | 56-70 | F   | Colon         | COAD        | 60%           | 4,781,805    | 97.2%                  | 1,814                | 89.8%                      | 93.7%                      | 92.5%                        | 299,524                     | 295,031                   | -0.0021                    | 0.0008              | 181          | Included     | Included                         |
| MO-105    | >70   | M   | Lymph Node*   | MEL         | 30%           | 5,624,119    | 96.8%                  | 2,088                | 88.6%                      | 93.7%                      | 93.1%                        | 62,008                      | 60,275                    | -0.0125                    | 0.0047              | 185          | Included     | Included                         |
| MO-106    | 56-70 | M   | Pleural Fluid | LUAD        | 15%           | 5,226,290    | 98.0%                  | 2,026                | 88.1%                      | 93.7%                      | 92.5%                        | 9,600                       | 4,648                     | 0.0910                     | -0.4560             | 179          | Included     | Included                         |

Clinicopathological and sequencing statistics for all molecular (MO) cohort samples are shown. For each sample in the molecular cohort, the age and sex of the patient are indicated. The primary cancer type is given (LUAD=lung adenocarcinoma, MEL=melanoma, COAD=colorectal adenocarcinoma, O=other). The anatomic site of the specimen and type (\*=metastasis and #=FNA [fine needle aspiration] specimen) is indicated, as is the histopathologic estimated tumor content of each specimen. Cases where another block from the tested case(&), or another case(\*) were profiled are indicated. For each sample, DNA and RNA sequencing statistics are provided; samples not sequenced are indicated (N/S). Samples excluded from either DNA or RNA analyses are indicated; unless otherwise indicated, excluded samples were excluded from all DNA- or RNA-based analyses.

**Table S3: Clinicopathological and sequencing statistics for lung (LU) cohort**

| Sample | Age   | Sex | Location        | Procedure     | Histologic Type                 | Stage    | Tumor Content | DNA          |                        |                      |                            | RNA                        |                              | ALK 3'/5' Ratio | ROS1 3'/5' Ratio | Total variant calls | DNA Analysis | RNA Analysis | Molecular EGFR testing | Molecular ALK testing |                             |                                         |
|--------|-------|-----|-----------------|---------------|---------------------------------|----------|---------------|--------------|------------------------|----------------------|----------------------------|----------------------------|------------------------------|-----------------|------------------|---------------------|--------------|--------------|------------------------|-----------------------|-----------------------------|-----------------------------------------|
|        |       |     |                 |               |                                 |          |               | Mapped Reads | Mapped reads on target | Base coverage (mean) | Base coverage (uniformity) | Target base coverage at 1x | Target base coverage at 100x |                 |                  |                     |              |              |                        |                       | Mapped RNASeq Reads (Total) | Mapped RNASeq Reads (Housekeeping Only) |
| LU-1   | <56   | M   | Pleural fluid   | Thoracentesis | AD                              | IV       | 80%           | 5,969,607    | 98.8%                  | 2,342                | 84.3%                      | 94.5%                      | 92.8%                        | 1,250,772       | 944,296          | 0.1680              | -0.0503      | 163          | Included               | Included              | Neg                         | Pos                                     |
| LU-2   | 56-70 | M   | Pleural fluid   | Thoracentesis | AD                              | IV       | 20%           | 4,107,488    | 96.3%                  | 1,557                | 87.1%                      | 94.4%                      | 92.3%                        | 446,782         | 444,954          | 0.0000              | -0.0031      | 180          | Included               | Included              | Neg                         | Pos                                     |
| LU-3   | 56-70 | M   | Pleural fluid   | Thoracentesis | AD                              | IV       | 30%           | 5,346,021    | 98.3%                  | 2,080                | 86.8%                      | 94.5%                      | 93.1%                        | 21,014          | 20,789           | -0.0074             | -0.0002      | 189          | Included               | Included              | Neg                         | Neg                                     |
| LU-8   | <56   | F   | Primary         | Resection     | AD                              | IV       | 40%           | 5,143,835    | 98.3%                  | 2,061                | 82.2%                      | 99.8%                      | 95.0%                        | 36,393          | 8,565            | 0.0000              | -0.3250      | 230          | Included               | Included              | N/A                         | N/A                                     |
| LU-9   | 56-70 | F   | Lymph node met. | Resection     | AD                              | IIb      | 60%           | 4,553,899    | 96.0%                  | 1,695                | 87.5%                      | 94.4%                      | 91.8%                        | 376,117         | 48,669           | 0.0000              | -0.6930      | 185          | Included               | Included              | N/A                         | N/A                                     |
| LU-10  | >70   | M   | Primary         | Resection     | AD                              | Ia       | 40%           | 3,748,885    | 96.5%                  | 1,397                | 83.6%                      | 94.4%                      | 90.8%                        | 6,132           | 2,255            | 0.0000              | 0.1610       | 186          | Included               | Included              | N/A                         | N/A                                     |
| LU-12  | <56   | F   | Primary         | Resection     | AD                              | Ia       | 35%           | 4,575,944    | 94.6%                  | 1,646                | 85.1%                      | 94.4%                      | 91.5%                        | Excl.           | Excl.            | Excl.               | Excl.        | 696          | Excluded               | Excluded              | N/A                         | N/A                                     |
| LU-13  | <56   | F   | Primary         | Resection     | AD                              | Ia       | 50%           | 5,020,404    | 98.4%                  | 1,899                | 79.5%                      | 94.4%                      | 89.9%                        | 213,160         | 75,265           | 0.0000              | -0.3460      | 181          | Included               | Included              | N/A                         | N/A                                     |
| LU-15  | >70   | F   | Primary         | Resection     | AD                              | IIb      | 50%           | 6,049,359    | 98.0%                  | 2,289                | 86.0%                      | 94.5%                      | 92.7%                        | 25,022          | 5,467            | 0.0002              | 0.2560       | 203          | Included               | Included              | N/A                         | N/A                                     |
| LU-17  | 56-70 | F   | Primary         | Resection     | AD                              | Ia       | 45%           | 5,146,282    | 98.4%                  | 1,976                | 85.3%                      | 94.6%                      | 92.4%                        | 16,576          | 12,215           | 0.0000              | -0.0744      | 170          | Included               | Included              | N/A                         | N/A                                     |
| LU-20  | 56-70 | F   | Primary         | Resection     | AD                              | IIb      | 40%           | 5,287,933    | 98.2%                  | 2,011                | 84.0%                      | 94.5%                      | 91.8%                        | 67,384          | 41,195           | 0.0012              | -0.0437      | 208          | Included               | Included              | N/A                         | N/A                                     |
| LU-22  | 56-70 | F   | Primary         | Resection     | AD                              | IIb      | 50%           | 5,947,658    | 97.8%                  | 2,240                | 81.0%                      | 94.5%                      | 91.9%                        | 28,483          | 21,250           | 0.0170              | -0.0867      | 199          | Included               | Included              | N/A                         | N/A                                     |
| LU-23  | 56-70 | M   | Primary         | Resection     | AD                              | IV       | 60%           | 5,138,133    | 96.3%                  | 1,897                | 87.4%                      | 94.4%                      | 92.2%                        | 5,559           | 5,233            | 0.0000              | -0.0409      | 216          | Included               | Included              | N/A                         | N/A                                     |
| LU-25  | 56-70 | F   | Brain met.      | Biopsy        | AD                              | IIb      | 40%           | 4,979,444    | 98.3%                  | 1,944                | 88.5%                      | 94.6%                      | 92.2%                        | 174,255         | 27,778           | 0.0200              | -0.0345      | 184          | Included               | Included              | Exon 19 del                 | Neg                                     |
| LU-26  | >70   | F   | Primary         | Resection     | AD                              | IIa      | 50%           | 4,688,735    | 97.0%                  | 1,729                | 77.4%                      | 94.3%                      | 88.7%                        | 14,158          | 5,458            | 0.0053              | -0.4160      | 263          | Included               | Included              | Exon 19 del                 | Neg                                     |
| LU-27  | >70   | F   | Primary         | Resection     | SQ                              | Ia       | 50%           | 4,172,742    | 96.0%                  | 1,577                | 88.1%                      | 94.4%                      | 92.8%                        | 40,394          | 28,029           | 0.0018              | -0.0031      | 173          | Included               | Included              | N/A                         | N/A                                     |
| LU-28  | <56   | F   | Primary         | Resection     | AD                              | IIb      | 70%           | 6,085,162    | 98.4%                  | 2,390                | 82.9%                      | 94.5%                      | 92.7%                        | 789,466         | 713,477          | -0.0422             | -0.0014      | 184          | Included               | Included              | N/A                         | N/A                                     |
| LU-29  | >70   | F   | Primary         | Resection     | AD with micropapillary features | Ia       | 50%           | 6,063,251    | 98.6%                  | 2,378                | 83.8%                      | 94.4%                      | 92.4%                        | 1,422,621       | 255,669          | -0.0072             | -0.8880      | 174          | Included               | Included              | N/A                         | N/A                                     |
| LU-30  | 56-70 | F   | Primary         | Resection     | AD                              | Ia       | 50%           | 4,548,115    | 95.4%                  | 1,709                | 87.1%                      | 94.5%                      | 92.3%                        | 384,752         | 251,885          | 0.2510              | -0.0433      | 170          | Included               | Included              | N/A                         | Pos                                     |
| LU-31  | 56-70 | M   | Primary         | Resection     | SCC                             | IIb      | 60%           | 5,550,653    | 98.5%                  | 2,174                | 80.8%                      | 94.3%                      | 91.4%                        | 515,849         | 340,376          | -0.0100             | -0.0082      | 163          | Included               | Included              | N/A                         | N/A                                     |
| LU-32  | <56   | F   | Primary         | Resection     | AD                              | IIa      | 60%           | 6,205,213    | 98.6%                  | 2,442                | 85.0%                      | 94.5%                      | 92.7%                        | 528,615         | 297,072          | -0.0213             | 0.0027       | 179          | Included               | Included              | N/A                         | N/A                                     |
| LU-33  | 56-70 | M   | Primary         | Resection     | AD                              | IIa      | 50%           | 5,955,701    | 98.6%                  | 2,328                | 85.5%                      | 94.5%                      | 92.8%                        | 1,172,885       | 424,459          | -0.0012             | -0.5850      | 181          | Included               | Included              | N/A                         | N/A                                     |
| LU-35  | >70   | M   | Primary         | Resection     | AD                              | Ia       | 50%           | 3,982,497    | 93.3%                  | 1,440                | 87.3%                      | 94.4%                      | 91.9%                        | 652,203         | 210,848          | 0.0012              | -0.5650      | 178          | Included               | Included              | N/A                         | N/A                                     |
| LU-37  | >70   | M   | Primary         | Resection     | SQ                              | Ia       | 50%           | 5,033,735    | 98.0%                  | 1,938                | 87.6%                      | 94.5%                      | 92.2%                        | 53,127          | 41,688           | -0.0036             | -0.0219      | 164          | Included               | Included              | N/A                         | N/A                                     |
| LU-38  | >70   | F   | Primary         | Resection     | AD                              | Ia       | 40%           | 5,142,361    | 97.9%                  | 1,990                | 87.6%                      | 94.4%                      | 92.6%                        | 11,308          | 6,859            | 0.0440              | -0.2010      | 169          | Included               | Included              | N/A                         | Pos                                     |
| LU-39  | >70   | M   | Primary         | Resection     | AD                              | Ia       | 60%           | 5,264,961    | 98.2%                  | 2,028                | 86.5%                      | 94.5%                      | 92.7%                        | 18,314          | 10,909           | 0.0000              | 0.0310       | 217          | Included               | Included              | N/A                         | N/A                                     |
| LU-40  | >70   | M   | Primary         | Resection     | AD                              | IIb      | 60%           | 6,052,642    | 98.3%                  | 2,381                | 88.2%                      | 94.5%                      | 92.6%                        | 854,975         | 112,875          | 0.0013              | -0.4570      | 225          | Included               | Included              | N/A                         | N/A                                     |
| LU-41  | >70   | F   | Primary         | Resection     | AD                              | IIa      | 60%           | 4,179,146    | 96.4%                  | 1,527                | 87.9%                      | 94.5%                      | 92.3%                        | 251,226         | 128,360          | 0.0015              | -0.0532      | 228          | Included               | Included              | N/A                         | N/A                                     |
| LU-42  | 56-70 | F   | Primary         | Resection     | SQ                              | IIa      | 40%           | 5,574,612    | 97.9%                  | 2,153                | 88.8%                      | 94.5%                      | 92.5%                        | 141,084         | 113,843          | -0.0040             | 0.0430       | 179          | Included               | Included              | N/A                         | N/A                                     |
| LU-45  | >70   | F   | Primary         | Resection     | AD with micropapillary features | Ia       | 50%           | 3,587,660    | 96.4%                  | 1,380                | 89.6%                      | 94.5%                      | 92.6%                        | 1,464,678       | 213,307          | 0.0000              | -0.3070      | 164          | Included               | Included              | N/A                         | N/A                                     |
| LU-46  | 56-70 | F   | Primary         | Resection     | SQ                              | IIa      | 50%           | 5,280,118    | 97.5%                  | 2,035                | 87.4%                      | 94.4%                      | 92.4%                        | 102,628         | 82,940           | -0.0027             | -0.0646      | 179          | Included               | Included              | N/A                         | N/A                                     |
| LU-47  | >70   | F   | Primary         | Resection     | ADSQ                            | Ia       | 30%           | 4,819,554    | 97.6%                  | 1,869                | 89.4%                      | 94.5%                      | 93.0%                        | 1,359,461       | 1,250,204        | 0.0021              | -0.0308      | 189          | Included               | Included              | N/A                         | N/A                                     |
| LU-48  | >70   | F   | Primary         | Resection     | AD                              | IIa      | 60%           | 5,460,727    | 98.3%                  | 2,140                | 88.0%                      | 94.5%                      | 92.7%                        | 648,405         | 313,343          | 0.0000              | -0.1510      | 204          | Included               | Included              | N/A                         | N/A                                     |
| LU-49  | <56   | F   | Primary         | Resection     | AD                              | Ia       | 40%           | 6,320,117    | 98.6%                  | 2,479                | 83.2%                      | 94.4%                      | 92.5%                        | 105,397         | 79,990           | -0.0169             | -0.0399      | 179          | Included               | Included              | Neg                         | Neg                                     |
| LU-50  | >70   | M   | Primary         | Resection     | SQ                              | IIb      | 50%           | 3,630,979    | 95.4%                  | 1,337                | 87.0%                      | 94.4%                      | 91.4%                        | 209,427         | 194,094          | 0.0000              | -0.0010      | 167          | Included               | Included              | N/A                         | N/A                                     |
| LU-52  | <56   | M   | Primary         | Resection     | SQ                              | Ia       | 40%           | 5,709,569    | 97.1%                  | 2,169                | 89.5%                      | 94.5%                      | 93.1%                        | 387,294         | 248,236          | 0.0029              | -0.0257      | 178          | Included               | Included              | N/A                         | N/A                                     |
| LU-54  | 56-70 | F   | Primary         | Resection     | SCC                             | IIa      | 60%           | 4,420,349    | 98.0%                  | 1,723                | 88.4%                      | 94.5%                      | 92.4%                        | 540,551         | 199,656          | -0.0658             | -0.0542      | 188          | Included               | Included              | N/A                         | N/A                                     |
| LU-55  | >70   | M   | Primary         | Resection     | AD                              | IIa      | 70%           | 5,710,566    | 98.3%                  | 2,247                | 89.0%                      | 94.5%                      | 92.5%                        | 627,032         | 271,689          | 0.0006              | -0.2280      | 160          | Included               | Included              | N/A                         | N/A                                     |
| LU-56  | 56-70 | M   | Primary         | Resection     | AD                              | IIb      | 50%           | 5,446,549    | 98.6%                  | 2,150                | 88.5%                      | 94.5%                      | 92.7%                        | 389,895         | 204,487          | 0.0065              | -0.2480      | 171          | Included               | Included              | N/A                         | N/A                                     |
| LU-58  | 56-70 | M   | Primary         | Resection     | SQ                              | IIb      | 40%           | 5,768,149    | 98.3%                  | 2,262                | 87.8%                      | 94.5%                      | 93.0%                        | 1,501,837       | 1,160,672        | -0.0009             | 0.0083       | 172          | Included               | Included              | N/A                         | N/A                                     |
| LU-59  | >70   | M   | Primary         | Resection     | AD with micropapillary features | Ia       | 60%           | 6,332,387    | 98.5%                  | 2,481                | 87.8%                      | 94.5%                      | 93.2%                        | 528,552         | 434,155          | 0.0039              | -0.0029      | 168          | Included               | Included              | N/A                         | N/A                                     |
| LU-60  | >70   | F   | Primary         | Resection     | AD                              | Ia       | 50%           | 5,669,210    | 97.1%                  | 2,137                | 85.2%                      | 94.5%                      | 91.7%                        | 82,860          | 54,080           | 0.0000              | -0.2130      | 172          | Included               | Included              | N/A                         | N/A                                     |
| LU-61  | >70   | F   | Primary         | Resection     | AD                              | Ia       | 60%           | 5,885,922    | 97.5%                  | 2,224                | 88.7%                      | 94.5%                      | 92.4%                        | 10,039          | 3,017            | 0.0000              | 1.0820       | 209          | Included               | Included              | N/A                         | N/A                                     |
| LU-63  | 56-70 | F   | Primary         | Resection     | AD                              | IIb      | 40%           | 5,918,855    | 98.3%                  | 2,238                | 84.5%                      | 94.4%                      | 91.6%                        | 14,043          | 7,309            | 0.0000              | -0.0788      | 240          | Included               | Included              | N/A                         | N/A                                     |
| LU-64  | >70   | F   | Primary         | Resection     | AD                              | IV       | 40%           | 6,095,349    | 98.0%                  | 2,287                | 86.2%                      | 94.5%                      | 92.3%                        | 4,662           | 1,095            | 0.0000              | -0.8820      | 214          | Included               | Included              | N/A                         | N/A                                     |
| LU-65  | 56-70 | F   | Primary         | Resection     | AD                              | IIb      | 60%           | 6,505,206    | 98.5%                  | 2,482                | 81.0%                      | 94.4%                      | 91.6%                        | 2,146           | 1,869            | 0.0000              | -0.1460      | 230          | Included               | Included              | N/A                         | N/A                                     |
| LU-67  | >70   | F   | Primary         | Resection     | AD                              | IIb      | 60%           | 4,744,878    | 96.9%                  | 1,757                | 87.1%                      | 94.5%                      | 91.4%                        | 22,721          | 9,841            | 0.0001              | -0.0852      | 214          | Included               | Included              | N/A                         | N/A                                     |
| LU-68  | >70   | M   | Primary         | Resection     | AD                              | Ia       | 30%           | 6,090,838    | 98.5%                  | 2,311                | 83.7%                      | 94.6%                      | 92.2%                        | 335             | 48               | 0.0000              | -5.2500      | 201          | Included               | Included              | N/A                         | N/A                                     |
| LU-69  | 56-70 | M   | Primary         | Resection     | AD                              | IIb      | 50%           | 5,993,730    | 98.2%                  | 2,252                | 84.5%                      | 94.5%                      | 92.2%                        | 440             | 134              | 0.0300              | -0.4330      | 189          | Included               | Included              | N/A                         | N/A                                     |
| LU-71  | >70   | M   | Primary         | Resection     | AD                              | IIb      | 50%           | 4,300,847    | 97.4%                  | 1,617                | 84.2%                      | 94.5%                      | 90.6%                        | 22,565          | 10,034           | 0.0000              | -0.1500      | 448          | Included               | Included              | N/A                         | N/A                                     |
| LU-74  | 56-70 | M   | Primary         | Resection     | AD                              | Ia       | 40%           | 5,227,598    | 95.0%                  | 1,912                | 88.1%                      | 94.6%                      | 92.3%                        | 61,271          | 25,233           | 0.0000              | -0.2030      | 248          | Included               | Included              | N/A                         | N/A                                     |
| LU-75  | 56-70 | M   | Primary         | Resection     | AD                              | IIb      | 70%           | 5,905,485    | 96.6%                  | 2,199                | 85.9%                      | 94.5%                      | 91.7%                        | 24,808          | 20,787           | 0.0000              | 0.0310       | 211          | Included               | Included              | N/A                         | N/A                                     |
| LU-76  | 56-70 | M   | Primary         | Resection     | AD                              | IIb      | 50%           | 6,299,154    | 98.2%                  | 2,403                | 86.1%                      | 94.5%                      | 91.9%                        | 5,390           | 5,362            | 0.0000              | 0.0000       | 211          | Included               | Included              | N/A                         | N/A                                     |
| LU-77  | >70   | M   | Primary         | Resection     | AD                              | IIb      | 60%           | 6,692,691    | 98.0%                  | 2,539                | 87.6%                      | 94.5%                      | 92.2%                        | 2,539           | 2,134            | 0.0000              | -0.0305      | 226          | Included               | Included              | N/A                         | N/A                                     |
| LU-78  | <56   | F   | Primary         | Resection     | AD                              | IIb      | 60%           | 5,752,990    | 94.8%                  | 2,047                | 84.2%                      | 94.4%                      | 91.6%                        | Excl.           | Excl.            | Excl.               | Excl.        | 2824         | Excluded               | Excluded              | N/A                         | N/A                                     |
| LU-79  | 56-70 | M   | Primary         | Resection     | AD                              | IIa      | 60%           | 5,171,200    | 97.7%                  | 1,944                | 88.6%                      | 94.5%                      | 92.3%                        | 58,789          | 38,215           | 0.0100              | -0.0334      | 200          | Included               | Included              | N/A                         | N/A                                     |
| LU-81  | >70   | M   | Primary         | Resection     | AD with micropapillary features | Brnch. % | N/A           | 5,846,206    | 98.5%                  | 2,271                | 86.2%                      | 94.5%                      | 92.9%                        | 108,082         | 52,955           | 0.0000              | -0.1390      | 169          | Included               | Included              | N/A                         | N/A                                     |
| LU-82  | >70   | M   | Primary         | Resection     | AD with micropapillary features | Ia       | 40%           | 4,911,868    | 98.3%                  | 1,927                | 88.9%                      | 94.5%                      | 92.3%                        | 190,113         | 100,020          | 0.0005              | -0.1260      | 168          | Included               | Included              | N/A                         | N/A                                     |
| LU-83  | >70   | M   | Primary         | Resection     | ADSQ                            | IIb      | 30%           | 6,144,692    | 98.1%                  | 2,368                | 87.1%                      | 94.6%                      | 92.0%                        | 79,721          | 43,794           | -0.0001             | -0.0318      | 160          | Included               | Included              | N/A                         | N/A                                     |
| LU-85  | >70   | M   | Primary         | Resection     | AD                              | IIb      | 40%           | 4,241,499    | 98.0%                  | 1,632                | 79.6%                      | 94.3%                      | 90.2%                        | 38,411          | 14,163           | -0.0001             | -0.2010      | 161          | Included               | Included              | N/A                         | N/A                                     |
| LU-87  | 56-70 | F   | Primary         | Resection     | SQ                              | Ia       | 40%           | 6,016,916    | 98.2%                  | 2,317                | 83.7%                      |                            |                              |                 |                  |                     |              |              |                        |                       |                             |                                         |

| Sample              | Age   | Sex | Location        | Procedure     | Histologic Type              | Stage | Tumor Content | DNA          |                        |                      |                            |                            | RNA                          |                             | ALK 3'/5' Imbalance Ratio | ROS1 3'/5' Imbalance Ratio | Total variant calls | DNA Analysis | RNA Analysis    | Molecular EGFR testing | Molecular ALK testing |                                         |
|---------------------|-------|-----|-----------------|---------------|------------------------------|-------|---------------|--------------|------------------------|----------------------|----------------------------|----------------------------|------------------------------|-----------------------------|---------------------------|----------------------------|---------------------|--------------|-----------------|------------------------|-----------------------|-----------------------------------------|
|                     |       |     |                 |               |                              |       |               | Mapped Reads | Mapped reads on target | Base coverage (mean) | Base coverage (uniformity) | Target base coverage at 1x | Target base coverage at 100x | Mapped RNASeq Reads (Total) |                           |                            |                     |              |                 |                        |                       | Mapped RNASeq Reads (Housekeeping Only) |
|                     |       |     |                 |               |                              |       |               |              |                        |                      |                            |                            |                              |                             |                           |                            |                     |              |                 |                        |                       |                                         |
| LU-119              | >70   | F   | Primary         | Resection     | SQ                           | Ila   | 60%           | 5,836,579    | 97.7%                  | 2,248                | 87.5%                      | 94.5%                      | 92.3%                        | 245,037                     | 121,318                   | 0.0000                     | -0.1880             | 162          | Included        | Included               | N/A                   | N/A                                     |
| LU-120              | 56-70 | F   | Primary         | Resection     | AD                           | Ila   | 40%           | 5,929,848    | 98.3%                  | 2,311                | 88.2%                      | 94.5%                      | 92.5%                        | 188,835                     | 94,079                    | 0.0000                     | 0.1190              | 161          | Included        | Included               | N/A                   | N/A                                     |
| LU-121              | >70   | M   | Primary         | Resection     | AD with signet ring features | Illa  | 70%           | 5,486,481    | 98.1%                  | 2,130                | 88.5%                      | 94.4%                      | 92.5%                        | 132,771                     | 82,076                    | 0.0000                     | -0.0448             | 169          | Included        | Included               | N/A                   | N/A                                     |
| LU-123              | >70   | F   | Primary         | Resection     | AD                           | Ila   | 40%           | 5,175,719    | 97.8%                  | 1,991                | 88.9%                      | 94.5%                      | 92.5%                        | 275,982                     | 108,258                   | 0.0047                     | -0.2220             | 203          | Included        | Included               | N/A                   | N/A                                     |
| LU-127              | 56-70 | F   | Primary         | Resection     | AD                           | Ia    | 50%           | 6,881,529    | 98.4%                  | 2,653                | 84.4%                      | 94.5%                      | 92.7%                        | 215,551                     | 112,719                   | 0.0040                     | -0.0221             | 194          | Included        | Included               | N/A                   | N/A                                     |
| LU-128              | 56-70 | M   | Primary         | Resection     | AD with papillary features   | Ib    | 60%           | 6,077,795    | 98.4%                  | 2,386                | 88.7%                      | 94.5%                      | 92.6%                        | 232,561                     | 94,623                    | 0.0000                     | -0.1260             | 175          | Included        | Included               | N/A                   | N/A                                     |
| LU-130              | 56-70 | F   | Primary         | Resection     | SQ                           | Ia    | 60%           | 5,818,574    | 98.0%                  | 2,244                | 86.8%                      | 94.4%                      | 92.3%                        | 340,523                     | 184,567                   | -0.0107                    | -0.0245             | 184          | Included        | Included               | N/A                   | N/A                                     |
| LU-132              | <56   | F   | Lymph node met. | Resection     | SQ                           | Illa  | 40%           | 5,672,923    | 97.8%                  | 2,159                | 86.5%                      | 94.4%                      | 92.5%                        | 37,452                      | 36,907                    | 0.0001                     | -0.0002             | 243          | Included        | Included               | N/A                   | N/A                                     |
| LU-133              | <56   | M   | Primary         | Resection     | ADSQ                         | Ia    | 70%           | 6,477,722    | 98.1%                  | 2,511                | 88.1%                      | 94.4%                      | 92.5%                        | 323,625                     | 288,260                   | 0.0000                     | -0.0441             | 168          | Included        | Included               | N/A                   | N/A                                     |
| LU-134              | >70   | M   | Primary         | Resection     | AD                           | Ia    | 50%           | 5,311,200    | 97.6%                  | 2,009                | 72.7%                      | 94.3%                      | 87.6%                        | 1,504                       | 1,145                     | -0.0061                    | -0.2150             | 189          | Included        | Included               | N/A                   | N/A                                     |
| LU-135              | 56-70 | M   | Primary         | Resection     | SQ                           | Illa  | 50%           | 4,455,328    | 96.9%                  | 1,677                | 88.4%                      | 94.5%                      | 92.0%                        | 74,700                      | 65,323                    | 0.0000                     | -0.0573             | 173          | Included        | Included               | N/A                   | N/A                                     |
| LU-137              | >70   | F   | Primary         | Resection     | AD                           | Ia    | 40%           | 5,904,275    | 98.1%                  | 2,257                | 84.8%                      | 94.5%                      | 92.5%                        | 37,669                      | 31,743                    | 0.0046                     | -0.0016             | 164          | Included        | Included               | N/A                   | N/A                                     |
| LU-141 <sup>1</sup> | 56-70 | F   | Lymph node met. | FNA           | AD                           | IV    | 40%           | 4,844,329    | 96.9%                  | 1,826                | 89.8%                      | 94.4%                      | 92.6%                        | 344,201                     | 76,534                    | -0.0063                    | -0.5340             | 161          | Excl. (CN only) | Included               | L858R                 | Neg                                     |
| LU-143 <sup>1</sup> | 56-70 | F   | Pleura          | Biopsy        | AD                           | IV    | 50%           | 5,721,911    | 97.6%                  | 2,186                | 84.4%                      | 94.5%                      | 92.1%                        | 233,287                     | 34,302                    | -0.0080                    | -0.8520             | 155          | Included        | Included               | L858R                 | Neg                                     |
| LU-144 <sup>2</sup> | >70   | M   | Bronch. Fluid   | BAL           | AD                           | N/A   | 40%           | 4,909,478    | 97.3%                  | 1,853                | 89.4%                      | 94.5%                      | 92.3%                        | 22,206                      | 19,602                    | 0.0002                     | -0.0438             | 177          | Included        | Included               | Exon 19 del           | Neg                                     |
| LU-145 <sup>2</sup> | >70   | M   | Primary         | Biopsy        | Bronch. <sup>#</sup>         | N/A   | 5%            | 5,160,013    | 96.9%                  | 1,989                | 89.2%                      | 94.4%                      | 93.1%                        | 354,492                     | 168,122                   | 0.0041                     | -0.1660             | 162          | Included        | Included               | N/A                   | N/A                                     |
| LU-146 <sup>4</sup> | 56-70 | F   | Primary         | Resection     | ADSQ                         | IV    | 30%           | 6,647,505    | 98.6%                  | 2,590                | 83.6%                      | 94.4%                      | 93.0%                        | 189,350                     | 105,571                   | 0.0000                     | 0.0460              | 175          | Included        | Included               | Exon 19 del           | Neg                                     |
| LU-147 <sup>4</sup> | 56-70 | F   | Brain met.      | Biopsy        | AD                           | IV    | 40%           | 6,128,778    | 97.9%                  | 2,338                | 78.1%                      | 94.5%                      | 91.2%                        | 24,069                      | 8,670                     | 0.0001                     | -0.1080             | 182          | Included        | Included               | N/A                   | N/A                                     |
| LU-148 <sup>5</sup> | 56-70 | M   | Bronch. Fluid   | BAL           | AD                           | Illa  | 70%           | 6,204,747    | 98.0%                  | 2,409                | 87.1%                      | 94.4%                      | 93.2%                        | 1,740,331                   | 1,530,196                 | 0.0022                     | -0.0105             | 192          | Included        | Included               | N/A                   | N/A                                     |
| LU-149 <sup>5</sup> | 56-70 | M   | Primary         | Biopsy        | AD                           | Illa  | 30%           | 5,074,236    | 97.9%                  | 1,921                | 88.3%                      | 94.5%                      | 92.4%                        | 964,416                     | 563,960                   | -0.0003                    | -0.1350             | 190          | Included        | Included               | Exon 19 del           | Neg                                     |
| LU-150              | <56   | M   | Pleural fluid   | Thoracentesis | AD                           | IV    | 40%           | 1,895,349    | 96.9%                  | 732                  | 92.9%                      | 100.0%                     | 96.7%                        | 677,756                     | 524,081                   | 0.0476                     | -0.1092             | 201          | Included        | Included               | Neg                   | Pos                                     |

Clinicopathological and sequencing statistics for all lung (LU) cohort samples are shown. For each sample in the lung cohort, the age, sex, location (met. = metastasis; Bronch. = bronchioalveolar), procedure (BAL = bronchioalveolar lavage; FNA = fine needle aspiration), and histologic type (AD = adenocarcinoma; SQ = squamous cell carcinoma; ADSQ = adenosquamous carcinoma; SCC = small cell carcinoma; Bronch. = bronchioalveolar carcinoma [adenocarcinoma in situ, well differentiated lepidic predominant adenocarcinoma]) are indicated. Cancer stage and estimated tumor content for each sample are also provided. For each sample, DNA and RNA sequencing statistics and variant call totals are provided. Samples excluded from either DNA or RNA analyses are indicated. Results for molecular diagnostic testing of *EGFR* and *ALK* (as performed for the MO cohort) are provided (Neg = negative; Pos = rearrangement positive), with identified *EGFR* mutations given. Paired samples are indicated in Sample column with superscript numbers (e.g., LU-141, LU-143<sup>1</sup>).

**Table S4: Clinicopathological and sequencing statistics for prostate (PR) cohort**

| Sample | Age   | Location         | Procedure | Histologic Type | Therapy         | Anti-androgen |         |         |               |              | DNA                    |                      |                            |                            |                              | RNA                         |                                         | Total variant calls | DNA      | RNA         |
|--------|-------|------------------|-----------|-----------------|-----------------|---------------|---------|---------|---------------|--------------|------------------------|----------------------|----------------------------|----------------------------|------------------------------|-----------------------------|-----------------------------------------|---------------------|----------|-------------|
|        |       |                  |           |                 |                 | Gleason       | T stage | N stage | Tumor content | Mapped Reads | Mapped reads on target | Base coverage (mean) | Base coverage (uniformity) | Target base coverage at 1x | Target base coverage at 100x | Mapped RNASeq Reads (Total) | Mapped RNASeq Reads (Housekeeping Only) |                     |          |             |
|        |       |                  |           |                 |                 |               |         |         |               |              |                        |                      |                            |                            |                              |                             |                                         |                     |          |             |
| PR-1   | >70   | Prostate         | RRP       | AD              | XRT             | Treated       | T4      | N0      | 60%           | 6,170,485    | 98.2%                  | 2,387                | 89.4%                      | 94.5%                      | 93.0%                        | 504,385                     | 137,855                                 | 168                 | Included | Included    |
| PR-2   | >70   | Bladder met.     | TUR       | AD              | XRT, ADT        | Treated       | T4      | NX      | 80%           | 5,753,180    | 97.8%                  | 2,220                | 86.8%                      | 94.4%                      | 92.8%                        | 157,779                     | 36,897                                  | 153                 | Included | Included    |
| PR-3   | 56-70 | Prostate         | Biopsy    | AD              | XRT, ADT        | Prostate      | N/A     | N/A     | 40%           | 5,581,489    | 97.9%                  | 2,187                | 82.3%                      | 94.5%                      | 92.1%                        | N/S                         | N/S                                     | 150                 | Included | Excl. (N/S) |
| PR-4   | 56-70 | Prostate         | RRP       | AD              | ADT             | Treated       | T2      | N0      | 10%           | 4,844,878    | 98.6%                  | 1,901                | 83.2%                      | 94.4%                      | 91.6%                        | N/S                         | N/S                                     | 168                 | Included | Excl. (N/S) |
| PR-5-2 | 56-70 | Prostate         | RRP       | AD              | None            | None          | T3a     | N1      | 50%           | 5,912,116    | 98.5%                  | 2,263                | 87.1%                      | 94.5%                      | 92.2%                        | LO                          | LO                                      | 196                 | Included | Excl. (LQ)  |
| PR-7-3 | 56-70 | Prostate         | RRP       | AD              | ADT             | 7 w 5         | T3b     | N1      | 60%           | 6,262,041    | 98.5%                  | 2,389                | 87.5%                      | 94.5%                      | 92.5%                        | 5,834                       | 2,736                                   | 196                 | Included | Included    |
| PR-8   | 56-70 | Lymph node met.  | Biopsy    | AD              | None            | Met.          | N/A     | N/A     | 80%           | 4,140,388    | 97.0%                  | 1,580                | 81.3%                      | 94.4%                      | 90.3%                        | N/S                         | N/S                                     | 167                 | Included | Excl. (N/S) |
| PR-9   | 56-70 | Prostate         | RRP       | AD              | None            | 7 w 5         | T3b     | N0      | 60%           | 5,708,666    | 98.7%                  | 2,251                | 85.1%                      | 94.5%                      | 92.5%                        | 373,644                     | 273,921                                 | 195                 | Included | Included    |
| PR-10  | >70   | Prostate         | RRP       | AD              | None            | 9             | T3b     | N0      | 60%           | 5,825,349    | 97.8%                  | 2,246                | 89.3%                      | 94.5%                      | 93.2%                        | 796,613                     | 732,707                                 | 186                 | Included | Included    |
| PR-11  | 56-70 | Prostate         | RRP       | AD              | None            | 9             | T3a     | N0      | 50%           | 5,670,307    | 95.3%                  | 1,663                | 86.1%                      | 94.3%                      | 91.7%                        | 476,659                     | 477,659                                 | 176                 | Included | Included    |
| PR-13  | 56-70 | Lymph node met   | Biopsy    | AD              | XRT, ADT        | Met.          | N/A     | N/A     | 50%           | 1,003,446    | 96.3%                  | 359                  | 78.3%                      | 93.9%                      | 70.7%                        | N/S                         | N/S                                     | 1689                | Included | Excl. (N/S) |
| PR-14  | 56-70 | Bone met.        | Biopsy    | AD              | XRT, ADT        | Met.          | N/A     | N/A     | 85%           | 4,857,069    | 97.5%                  | 1,825                | 85.9%                      | 94.6%                      | 92.4%                        | LQ                          | LQ                                      | 170                 | Included | Excl. (LQ)  |
| PR-15  | 56-70 | Lymph node met.  | Excision  | AD              | XRT             | N/A           | N/A     | N/A     | 80%           | 6,001,092    | 96.6%                  | 2,234                | 87.4%                      | 94.5%                      | 92.1%                        | 7,907                       | 5,005                                   | 247                 | Included | Included    |
| PR-16  | >70   | Prostate         | RRP       | AD              | XRT, ADT        | Met.          | T3b     | N1      | 80%           | 3,787,405    | 98.8%                  | 1,400                | 78.4%                      | 94.4%                      | 87.5%                        | N/S                         | N/S                                     | 240                 | Included | Excl. (N/S) |
| PR-17  | 56-70 | Prostate         | RRP       | AD              | None            | 9             | T3b     | N1      | 70%           | 5,884,612    | 98.2%                  | 2,293                | 89.7%                      | 94.5%                      | 93.1%                        | 446,123                     | 161,048                                 | 159                 | Included | Included    |
| PR-19  | 56-70 | Prostate         | RRP       | AD              | ADT             | Treated       | T3a     | N1      | 40%           | 5,499,890    | 97.5%                  | 2,089                | 85.8%                      | 94.6%                      | 92.7%                        | 206,018                     | 187,650                                 | 172                 | Included | Included    |
| PR-20  | 56-70 | Bone met.        | Biopsy    | AD              | ADT             | Met.          | N/A     | N/A     | 30%           | 6,198,944    | 98.5%                  | 2,438                | 89.2%                      | 94.5%                      | 93.3%                        | 351,645                     | 308,654                                 | 196                 | Included | Included    |
| PR-21  | >70   | Lung met.        | Resection | AD              | XRT, ADT        | Met.          | N/A     | N/A     | 40%           | 6,048,945    | 98.2%                  | 2,353                | 89.5%                      | 94.5%                      | 93.4%                        | 489,697                     | 327,862                                 | 165                 | Included | Included    |
| PR-22  | >70   | Lung met.        | Resection | AD              | XRT             | Met.          | N/A     | N/A     | 80%           | 6,432,124    | 97.8%                  | 2,543                | 88.8%                      | 94.5%                      | 92.4%                        | 497,857                     | 497,847                                 | 232                 | Included | Included    |
| PR-23  | <56   | Prostate         | RRP       | AD              | None            | 7             | T3a     | N1      | 70%           | 4,318,132    | 97.0%                  | 1,678                | 89.7%                      | 94.5%                      | 92.5%                        | 667,457                     | 96,461                                  | 167                 | Included | Included    |
| PR-24  | 56-70 | Bone met.        | Biopsy    | AD              | ADT, XRT, CHEMO | Abi           | Met.    | N/A     | N/A           | 5,911,675    | 97.5%                  | 2,309                | 87.3%                      | 94.5%                      | 92.5%                        | 865,196                     | 865,195                                 | 190                 | Included | Included    |
| PR-25  | <56   | Brain met.       | Biopsy    | AD              | ADT, CHEMO, XRT | Met.          | N/A     | N/A     | 80%           | 6,422,134    | 98.1%                  | 2,497                | 89.3%                      | 94.5%                      | 93.2%                        | 95,570                      | 88,025                                  | 173                 | Included | Included    |
| PR-26  | 56-70 | Liver met.       | Biopsy    | AD              | ADT, CHEMO, XRT | Met.          | N/A     | N/A     | 60%           | 5,935,760    | 98.2%                  | 2,304                | 88.8%                      | 94.5%                      | 93.2%                        | 746,614                     | 255,948                                 | 183                 | Included | Included    |
| PR-28  | <56   | Prostate         | RRP       | AD              | None            | 7             | T3b     | N1      | 50%           | 5,570,319    | 98.0%                  | 2,176                | 86.6%                      | 94.6%                      | 92.5%                        | N/S                         | N/S                                     | 244                 | Included | Excl. (N/S) |
| PR-30  | <56   | Prostate         | RRP       | AD              | None            | 9             | T3a     | N1      | 65%           | 6,006,931    | 98.4%                  | 2,310                | 87.2%                      | 94.5%                      | 92.3%                        | 14,455                      | 8,549                                   | 150                 | Included | Included    |
| PR-32  | <56   | Prostate         | RRP       | AD              | None            | 7 w 5         | T2      | N1      | 75%           | 4,093,979    | 90.1%                  | 903                  | 86.5%                      | 94.5%                      | 90.3%                        | 138,519                     | 121,883                                 | 263                 | Included | Included    |
| PR-34  | 56-70 | Prostate         | TUR       | AD              | XRT, ADT        | Treated       | N/A     | N/A     | 60%           | 5,721,269    | 98.0%                  | 2,198                | 87.6%                      | 94.5%                      | 92.9%                        | 14,112                      | 14,112                                  | 237                 | Included | Included    |
| PR-37  | >70   | Penile met.      | Resection | AD              | XRT, ADT        | Met.          | N/A     | N/A     | 60%           | 5,621,166    | 98.1%                  | 2,189                | 88.4%                      | 94.4%                      | 93.0%                        | 126,656                     | 118,055                                 | 192                 | Included | Included    |
| PR-40  | 56-70 | Prostate         | RRP       | AD              | XRT, ADT        | Treated       | T3b     | N0      | 65%           | 4,622,720    | 96.8%                  | 1,713                | 84.4%                      | 94.4%                      | 90.4%                        | 1,256                       | 1,040                                   | 229                 | Included | Included    |
| PR-42  | 56-70 | Prostate         | RRP       | AD              | None            | 7 w 5         | T3b     | N1      | 70%           | 4,243,815    | 97.5%                  | 1,626                | 82.7%                      | 94.4%                      | 90.9%                        | 183,652                     | 183,639                                 | 175                 | Included | Included    |
| PR-49  | 56-70 | Penis met.       | Resection | AD              | XRT, ADT        | Met.          | N/A     | N/A     | 80%           | 5,858,717    | 97.8%                  | 2,241                | 89.3%                      | 94.5%                      | 92.7%                        | 84,387                      | 37,703                                  | 180                 | Included | Included    |
| PR-51  | >70   | Soft tissue met. | Resection | AD              | XRT, ADT        | Met.          | N/A     | N/A     | 80%           | 5,636,102    | 98.1%                  | 2,157                | 87.4%                      | 94.4%                      | 92.2%                        | 12,920                      | 12,920                                  | 192                 | Included | Included    |
| PR-52  | >70   | Prostate         | RRP       | AD              | XRT             | Treated       | T2      | N1      | 60%           | 4,849,045    | 97.0%                  | 1,859                | 88.6%                      | 94.5%                      | 92.3%                        | N/S                         | N/S                                     | 173                 | Included | Excl. (N/S) |
| PR-53  | 56-70 | Prostate         | RRP       | AD              | ADT             | Treated       | T3b     | N1      | 50%           | 5,487,637    | 97.2%                  | 2,047                | 82.9%                      | 94.2%                      | 92.3%                        | 33,039                      | 22,143                                  | 180                 | Included | Included    |
| PR-55  | >70   | Lymph node met   | Biopsy    | AD              | None            | Met.          | N/A     | N/A     | 80%           | 4,751,600    | 98.1%                  | 1,796                | 83.1%                      | 94.4%                      | 91.9%                        | N/S                         | N/S                                     | 192                 | Included | Excl. (N/S) |
| PR-56  | 56-70 | Lymph node met   | Biopsy    | AD              | None            | Met.          | N/A     | N/A     | 60%           | 3,809,077    | 93.7%                  | 1,370                | 87.4%                      | 94.4%                      | 91.4%                        | N/S                         | N/S                                     | 204                 | Included | Excl. (N/S) |
| PR-57  | <56   | Lymph node met.  | Biopsy    | AD              | None            | Met.          | N/A     | N/A     | 70%           | 5,763,601    | 98.5%                  | 2,250                | 83.7%                      | 94.4%                      | 92.3%                        | 611,952                     | 47,661                                  | 204                 | Included | Included    |
| PR-58  | 56-70 | Prostate         | Biopsy    | AD              | None            | 10            | N/A     | N/A     | 60%           | 6,282,591    | 98.4%                  | 2,432                | 80.0%                      | 94.3%                      | 90.6%                        | 40,163                      | 31,369                                  | 163                 | Included | Included    |
| PR-59  | >70   | Prostate         | Biopsy    | AD              | None            | 9             | N/A     | N/A     | 70%           | 5,750,823    | 98.3%                  | 2,206                | 80.8%                      | 94.4%                      | 91.3%                        | N/S                         | N/S                                     | 184                 | Included | Excl. (N/S) |
| PR-60  | 56-70 | Lymph node met.  | Excision  | AD              | XRT, ADT, CHEMO | Met.          | N/A     | N/A     | 75%           | 4,640,500    | 98.0%                  | 1,773                | 72.1%                      | 94.1%                      | 84.1%                        | 259,902                     | 28,591                                  | 174                 | Included | Included    |
| PR-61  | >70   | Lymph node met   | Biopsy    | AD              | None            | Met.          | N/A     | N/A     | 50%           | 5,164,444    | 98.2%                  | 2,001                | 81.3%                      | 94.4%                      | 91.1%                        | N/S                         | N/S                                     | 186                 | Included | Excl. (N/S) |
| PR-62  | 56-70 | Prostate         | Biopsy    | AD              | None            | 10            | N/A     | N/A     | 70%           | 5,038,007    | 97.2%                  | 1,921                | 84.6%                      | 94.4%                      | 91.3%                        | 47,376                      | 40,151                                  | 195                 | Included | Included    |
| PR-63  | >70   | Prostate         | Biopsy    | AD              | None            | 9             | N/A     | N/A     | 60%           | 5,454,126    | 98.6%                  | 2,127                | 80.6%                      | 94.5%                      | 91.4%                        | 123,034                     | 118,163                                 | 179                 | Included | Included    |
| PR-64  | 56-70 | Prostate         | RRP       | AD              | None            | Met.          | T3b     | N1      | 60%           | 4,641,922    | 95.5%                  | 1,736                | 87.3%                      | 94.5%                      | 92.3%                        | 135,102                     | 26,023                                  | 175                 | Included | Included    |
| PR-66  | <56   | Prostate         | RRP       | AD              | None            | 9             | T3b     | N1      | 60%           | 4,393,562    | 96.7%                  | 1,659                | 87.8%                      | 94.5%                      | 92.6%                        | 312,398                     | 193,504                                 | 176                 | Included | Included    |
| PR-69  | 56-70 | Lymph node met.  | Biopsy    | AD              | XRT, ADT        | Treated       | N/A     | N/A     | 50%           | 4,168,467    | 98.1%                  | 1,621                | 81.9%                      | 94.4%                      | 91.0%                        | 12,558                      | 4,964                                   | 175                 | Included | Included    |
| PR-72* | 56-70 | Prostate         | TUR       | AD              | ADT             | 7             | N/A     | N/A     | 60%           | 5,935,625    | 98.5%                  | 2,260                | 83.2%                      | 94.5%                      | 92.4%                        | 401,946                     | 199,805                                 | 206                 | Included | Included    |
| PR-74* | 56-70 | Prostate         | TUR       | SCC             | ADT             | Treated       | N/A     | N/A     | 60%           | 5,655,641    | 98.2%                  | 2,193                | 85.0%                      | 94.5%                      | 92.3%                        | 896,491                     | 631,502                                 | 204                 | Included | Included    |
| PR-77* | 56-70 | Prostate         | RRP       | AD              | None            | 9             | T3b     | N0      | 70%           | 4,284,303    | 98.2%                  | 1,638                | 83.4%                      | 94.4%                      | 91.2%                        | 7,464                       | 6,855                                   | 178                 | Included | Included    |
| PR-78  | <56   | Prostate         | RRP       | AD              | None            | 7             | T3a     | N0      | 40%           | 4,881,683    | 98.2%                  | 1,880                | 83.2%                      | 94.4%                      | 91.1%                        | 10,629                      | 9,920                                   | 165                 | Included | Included    |
| PR-79  | 56-70 | Prostate         | RRP       | AD              | None            | 7 w 5         | T3a     | N0      | 80%           | 6,155,645    | 98.7%                  | 2,395                | 84.6%                      | 94.5%                      | 92.7%                        | 199,099                     | 195,862                                 | 166                 | Included | Included    |
| PR-82  | 56-70 | Prostate         | RRP       | AD              | None            | 9             | T3a     | N1      | 60%           | 6,199,244    | 98.7%                  | 2,442                | 88.2%                      | 94.5%                      | 93.1%                        | 146,846                     | 133,578                                 | 172                 | Included | Included    |
| PR-83  | >70   | Prostate         | TUR       | AD*             | None            | 9             | N/A     | N/A     | 80%           | 4,951,855    | 97.6%                  | 1,895                | 88.0%                      | 94.5%                      | 91.9%                        | 48,397                      | 46,140                                  | 158                 | Included | Included    |
| PR-84  | 56-70 | Bladder met.     | TUR       | AD*             | None            | Met.          | N/A     | N/A     | 30%           | 5,977,160    | 98.3%                  | 2,341                | 88.9%                      | 94.5%                      | 93.3%                        | 210,132                     | 184,813                                 | 162                 | Included | Included    |
| PR-85  | >70   | Prostate         | Biopsy    | AD*             | None            | Met.          | N/A     | N/A     | 50%           | 6,148,596    | 98.5%                  | 2,388                | 88.4%                      | 94.5%                      | 93.0%                        | 225,143                     | 160,669                                 | 176                 | Included | Included    |
| PR-86  | >70   | Prostate         | Biopsy    | SCC             | None            | 10            | N/A     | N/A     | 60%           | 6,149,783    | 98.6%                  | 2,362                | 85.1%                      | 94.5%                      | 92.6%                        | 5,228                       | 1,832                                   | 166                 | Included | Included    |
| PR-87  | >70   | Lymph node met.  | Excision  | AD*             | None            | Met.          | N/A     | N/A     | 80%           | 5,436,401    | 98.6%                  | 2,084                | 78.6%                      | 94.4%                      | 90.5%                        | 40,111                      | 4,424                                   | 166                 | Included | Included    |
| PR-88* | 56-70 | Bladder met.     | TUR       | AD*             | ADT, XRT, CHEMO | Treated       | N/A     | N/A     | 60%           | 6,293,422    | 98.5%                  | 2,407                | 82.4%                      | 94.4%                      | 91.8%                        | 1,752                       | 1,231                                   | 160                 | Included | Included    |
| PR-89  | >70   | Bladder met.     | TUR       | AD*             | None            | Met.          | N/A     | N/A     | 35%           | 6,866,848    | 98.7%                  | 2,651                | 83.1%                      | 94.5%                      | 92.7%                        | 12,186                      | 8,987                                   | 178                 | Included | Included    |

| Sample  | Age   | Location         | Procedure | Histologic Type | Therapy         | Anti-androgen | Gleason | T stage | N stage | Tumor content | DNA          |                        |                      |                            |                            | RNA                          |                             | Total variant calls | DNA | RNA      |                                         |
|---------|-------|------------------|-----------|-----------------|-----------------|---------------|---------|---------|---------|---------------|--------------|------------------------|----------------------|----------------------------|----------------------------|------------------------------|-----------------------------|---------------------|-----|----------|-----------------------------------------|
|         |       |                  |           |                 |                 |               |         |         |         |               | Mapped Reads | Mapped reads on target | Base coverage (mean) | Base coverage (uniformity) | Target base coverage at 1x | Target base coverage at 100x | Mapped RNASeq Reads (Total) |                     |     |          | Mapped RNASeq Reads (Housekeeping Only) |
|         |       |                  |           |                 |                 |               |         |         |         |               |              |                        |                      |                            |                            |                              |                             |                     |     |          |                                         |
| PR-127  | >70   | Prostate         | RRP       | AD              | None            |               | 9       | T3a     | N0      | 50%           | 3,742,604    | 97.6%                  | 1,440                | 87.9%                      | 94.4%                      | 92.6%                        | 154,735                     | 141,264             | 173 | Included | Included                                |
| PR-128  | 56-70 | Prostate         | RRP       | AD              | None            |               | 9       | T3b     | N0      | 70%           | 1,021,837    | 88.3%                  | 347                  | 88.3%                      | 94.2%                      | 85.7%                        | 12,161                      | 11,858              | 234 | Included | Included                                |
| PR-130  | >70   | Lung met.        | Resection | AD              | XRT             |               | Met.    | N/A     | N/A     | 50%           | 5,724,096    | 98.4%                  | 2,238                | 85.2%                      | 94.5%                      | 92.6%                        | 986                         | 683                 | 177 | Included | Included                                |
| PR-133  | 56-70 | Bladder met.     | TUR       | SCC             | None            |               | Met.    | N/A     | N/A     | 75%           | 5,840,581    | 98.6%                  | 2,280                | 83.9%                      | 94.4%                      | 92.4%                        | 389,308                     | 389,308             | 178 | Included | Included                                |
| PR-134  | 56-70 | Prostate         | TUR       | SCC             | ADT             | Abi           | Treated | N/A     | N/A     | 75%           | 6,094,223    | 98.2%                  | 2,374                | 85.3%                      | 94.4%                      | 92.9%                        | 594,098                     | 152,506             | 174 | Included | Included                                |
| PR-135  | 56-70 | Prostate         | Biopsy    | AD              | None            |               | 8       | N/A     | N/A     | 60%           | 3,716,363    | 98.3%                  | 1,460                | 89.3%                      | 94.4%                      | 92.4%                        | 226,099                     | 77,581              | 150 | Included | Included                                |
| PR-136  | >70   | Prostate         | Biopsy    | AD              | None            |               | 9       | N/A     | N/A     | 50%           | 6,516,796    | 98.5%                  | 2,569                | 89.6%                      | 94.6%                      | 93.4%                        | 394,526                     | 78,093              | 180 | Included | Included                                |
| PR-137  | 56-70 | Prostate         | Biopsy    | AD              | None            |               | 8       | N/A     | N/A     | 50%           | 4,778,694    | 97.6%                  | 1,854                | 89.3%                      | 94.5%                      | 92.8%                        | 330,314                     | 245,796             | 181 | Included | Included                                |
| PR-140  | 56-70 | Prostate         | RRP       | AD              | None            |               | 9       | T3a     | N0      | 60%           | 5,547,829    | 97.7%                  | 2,133                | 89.0%                      | 94.6%                      | 93.4%                        | 154,229                     | 145,036             | 176 | Included | Included                                |
| PR-141  | 56-70 | Prostate         | RRP       | AD              | None            |               | 9       | T2      | N0      | 70%           | 3,812,643    | 97.0%                  | 1,529                | 81.3%                      | 94.5%                      | 91.3%                        | 10,755                      | 9,550               | 159 | Included | Included                                |
| PR-142  | 56-70 | Prostate         | RRP       | AD              | None            |               | 9       | T3b     | N0      | 80%           | 3,797,434    | 98.0%                  | 1,497                | 89.5%                      | 94.5%                      | 93.1%                        | 270,933                     | 270,769             | 170 | Included | Included                                |
| PR-145  | 56-70 | Prostate         | Biopsy    | AD              | None            |               | 9       | N/A     | N/A     | 50%           | 5,087,036    | 98.7%                  | 2,010                | 89.9%                      | 94.5%                      | 93.3%                        | 110,728                     | 75,412              | 179 | Included | Included                                |
| PR-146  | 56-70 | Lymph node met.  | Biopsy    | AD              | ADT, XRT, CHEMO | Abi, Enza     | Met.    | N/A     | N/A     | 30%           | 5,763,563    | 98.4%                  | 2,257                | 85.3%                      | 94.5%                      | 93.1%                        | 254,627                     | 208,772             | 149 | Included | Included                                |
| PR-148  | <56   | Lymph node met.  | Excision  | AD              | None            |               | Met.    | T3b     | N1      | 30%           | 5,131,197    | 98.1%                  | 1,950                | 88.0%                      | 94.5%                      | 92.3%                        | 1,862                       | 1,548               | 185 | Included | Included                                |
| PR-149  | 56-70 | Prostate         | RRP       | SQ              | None            |               | 9       | T3b     | N1      | 60%           | 5,068,492    | 98.2%                  | 1,956                | 90.4%                      | 94.6%                      | 92.9%                        | 159,676                     | 155,680             | 199 | Included | Included                                |
| PR-154  | <56   | Prostate         | RRP       | AD              | ADT             |               | Treated | T3b     | N1      | 40%           | 5,435,151    | 98.0%                  | 2,065                | 85.5%                      | 94.4%                      | 92.2%                        | 14,697                      | 13,499              | 167 | Included | Included                                |
| PR-158  | 56-70 | Prostate         | RRP       | AD              | None            |               | 9       | T3b     | N1      | 50%           | 6,615,191    | 97.3%                  | 2,515                | 88.8%                      | 94.5%                      | 93.0%                        | LQ                          | LQ                  | 175 | Included | Excl. (LQ)                              |
| PR-159  | >70   | Bladder met.     | TUR       | AD*             | None            |               | 8       | N/A     | N/A     | 70%           | 4,737,805    | 97.6%                  | 1,867                | 88.9%                      | 94.5%                      | 92.7%                        | 56,571                      | 55,086              | 190 | Included | Included                                |
| PR-160  | <56   | Spinal cord met. | Biopsy    | AD              | ADT, CHEMO      |               | Met.    | N/A     | N/A     | 30%           | 5,511,052    | 98.1%                  | 2,107                | 83.8%                      | 94.5%                      | 92.0%                        | 75,597                      | 72,237              | 179 | Included | Included                                |
| PR-161* | <56   | Bladder met.     | TUR       | AD              | ADT, CHEMO      |               | Met.    | N/A     | N/A     | 40%           | 5,376,038    | 98.5%                  | 2,104                | 89.1%                      | 94.5%                      | 92.6%                        | 11,922                      | 11,329              | 256 | Included | Included                                |
| PR-162  | 56-70 | Prostate         | RRP       | AD              | None            |               | 9       | T3a     | N0      | 70%           | 6,993,611    | 97.8%                  | 2,705                | 89.1%                      | 94.5%                      | 93.1%                        | 16,479                      | 3,584               | 180 | Included | Included                                |
| PR-163  | 56-70 | Prostate         | RRP       | AD              | None            |               | 7       | T3b     | N0      | 60%           | 4,232,860    | 96.5%                  | 1,611                | 87.9%                      | 94.4%                      | 92.4%                        | 149,181                     | 124,744             | 181 | Included | Included                                |
| PR-166  | <56   | Prostate         | Biopsy    | AD              | None            |               | 9       | N/A     | N/A     | 60%           | 5,648,241    | 97.9%                  | 2,164                | 88.4%                      | 94.4%                      | 92.6%                        | 1,687                       | 1,046               | 185 | Included | Included                                |
| PR-167  | 56-70 | Prostate         | RRP       | AD              | None            |               | 9       | T2b     | N0      | 70%           | 3,487,409    | 95.2%                  | 1,298                | 88.6%                      | 94.4%                      | 91.8%                        | 39,636                      | 38,036              | 159 | Included | Included                                |
| PR-169  | >70   | Bone met.        | Biopsy    | AD              | ADT, XRT, CHEMO |               | Met.    | N/A     | N/A     | 40%           | 5,965,482    | 98.6%                  | 2,296                | 85.2%                      | 94.5%                      | 92.5%                        | 8,897                       | 8,727               | 201 | Included | Included                                |
| PR-170  | >70   | Soft tissue met. | Excision  | AD              | ADT             |               | Met.    | N/A     | N/A     | 50%           | 5,564,830    | 98.6%                  | 2,187                | 90.0%                      | 94.5%                      | 93.2%                        | 205,024                     | 42,464              | 172 | Included | Included                                |
| PR-172  | 56-70 | Spinal cord met. | Biopsy    | AD              | ADT             |               | Met.    | N/A     | N/A     | 80%           | 5,425,026    | 98.1%                  | 2,134                | 88.1%                      | 94.5%                      | 93.2%                        | 307,822                     | 97,012              | 198 | Included | Included                                |
| PR-175  | >70   | Prostate         | Biopsy    | AD              | XRT             |               | Treated | N/A     | N/A     | 70%           | 5,090,465    | 96.7%                  | 1,943                | 86.4%                      | 94.5%                      | 92.6%                        | 266,471                     | 252,667             | 173 | Included | Included                                |
| PR-179  | >70   | Prostate         | RRP       | AD              | XRT             |               | Treated | T3A     | N0      | 70%           | 6,227,895    | 98.2%                  | 2,420                | 87.5%                      | 94.5%                      | 93.0%                        | 659,899                     | 84,297              | 172 | Included | Included                                |

Clinicopathological and sequencing statistics for all prostate (PR) cohort samples are shown. For each sample, the age, location, procedure (RRP: rapid prostatectomy; TUR: transurethral resection), and histologic type (AD = adenocarcinoma; SCC = small cell carcinoma; SQ = squamous differentiation). Samples considered 'AR-' based on weak/focal prostate specific antigen (PSA) levels are indicated by \*. Prior therapy is indicated (ADT = androgen deprivation therapy; XRT = radiation therapy; CHEMO: systemic chemotherapy), along with treatment with second generation anti-androgen therapy (Abi = abiraterone; Enza = enzalutamide). Gleason score, T and N stage, and estimated tumor content for each sample are also provided. For each sample, DNA and RNA sequencing statistics and variant call totals are also provided. Any samples excluded from either DNA or RNA analyses are indicated. N/S: sample not sequenced; N/A: sequencing yielded no usable reads; LQ: low-quality - RNASeq yielded <350 mapped sequencing reads. Paired samples are indicated in Sample column with superscript numbers (e.g., PR-161\*).

**Table S5: OCP targeted alterations with approved and investigational targeted therapies**

| Alteration                              | Indication                     | Example Treatment(s)                   | Evidence        | Approved/Investigational |
|-----------------------------------------|--------------------------------|----------------------------------------|-----------------|--------------------------|
| ALK fusion                              | Non-Small Cell Lung Cancer     | ceritinib, crizotinib                  | FDA Labels      | Approved                 |
| BRAF mutation                           | Melanoma                       | dabrafenib, trametinib, vemurafenib    | FDA Labels      | Approved                 |
| EGFR mutation                           | Non-Small Cell Lung Cancer     | afatinib, erlotinib                    | FDA Labels      | Approved                 |
| ERBB2 amplification                     | Breast Cancer                  | pertuzumab, trastuzumab                | FDA Labels      | Approved                 |
| ERBB2 amplification                     | Gastric Cancer                 | trastuzumab                            | FDA Labels      | Approved                 |
| KRAS mutation                           | Colorectal Cancer              | cetuximab, panitumumab contraindicated | FDA Labels      | Approved                 |
| BRAF mutation                           | Non-Small Cell Lung Cancer     | dabrafenib, vemurafenib                | NCCN Guidelines | Approved                 |
| ERBB2 mutation                          | Non-Small Cell Lung Cancer     | afatinib                               | NCCN Guidelines | Approved                 |
| KIT mutation                            | Melanoma                       | imatinib mesylate                      | NCCN Guidelines | Approved                 |
| MET amplification                       | Non-Small Cell Lung Cancer     | crizotinib                             | NCCN Guidelines | Approved                 |
| NRAS mutation                           | Colorectal Cancer              | cetuximab, panitumumab contraindicated | NCCN Guidelines | Approved                 |
| PDGFRA mutation                         | Gastrointestinal Stromal Tumor | dasatinib                              | NCCN Guidelines | Approved                 |
| RET fusion                              | Non-Small Cell Lung Cancer     | cabozantinib                           | NCCN Guidelines | Approved                 |
| ROS1 fusion                             | Non-Small Cell Lung Cancer     | crizotinib                             | NCCN Guidelines | Approved                 |
| AKT1 mutation                           | Multiple                       | MK-2206, MSC-2363318A                  | Trials          | Investigational          |
| BAP1 mutation                           | Melanoma                       | vorinostat                             | Trials          | Investigational          |
| BRCA1 mutation, deletion                | Multiple                       | rucaparib, veliparib                   | Trials          | Investigational          |
| BRCA2 mutation, deletion                | Multiple                       | rucaparib, veliparib                   | Trials          | Investigational          |
| CCND1 amplification                     | Multiple                       | palbociclib                            | Trials          | Investigational          |
| CDK4 amplification, mutation            | Melanoma, NSCLC                | palbociclib                            | Trials          | Investigational          |
| CDK6 amplification                      | Non-Small Cell Lung Cancer     | palbociclib                            | Trials          | Investigational          |
| CDKN2A mutation                         | Multiple                       | crizotinib + dasatinib, palbociclib    | Trials          | Investigational          |
| DDR2 mutation                           | Multiple                       | crizotinib + dasatinib                 | Trials          | Investigational          |
| ERBB3 mutation                          | Multiple                       | neratinib                              | Trials          | Investigational          |
| FGFR1-4 mutation, amplification, fusion | Multiple                       | BGJ-398, JNJ-42756493                  | Trials          | Investigational          |
| GNA11 mutation                          | Melanoma                       | vorinostat                             | Trials          | Investigational          |
| GNAQ mutation                           | Melanoma                       | vorinostat                             | Trials          | Investigational          |
| HRAS mutation                           | Multiple                       | binimetinib + panitumumab, BVD-523     | Trials          | Investigational          |
| IDH1 mutation                           | Multiple                       | AG-120                                 | Trials          | Investigational          |
| KIT amplification                       | Melanoma                       | dasatinib                              | Trials          | Investigational          |
| KRAS mutation                           | Multiple                       | various MEKi combinations              | Trials          | Investigational          |
| MET mutation                            | Multiple                       | AMG-337, crizotinib, INCB-028060       | Trials          | Investigational          |
| MTOR mutation                           | Multiple                       | MSC-2363318A                           | Trials          | Investigational          |
| MYCN amplification                      | Multiple                       | GSK-525762                             | Trials          | Investigational          |
| NRAS mutation                           | Multiple                       | various MEKi combinations              | Trials          | Investigational          |
| PDGFRA amplification                    | Glioblastoma                   | nilotinib, sorafenib                   | Trials          | Investigational          |
| PIK3CA mutation                         | Multiple                       | various PI3K pathway combinations      | Trials          | Investigational          |
| PPARG fusion                            | Thyroid Cancer                 | pioglitazone                           | Trials          | Investigational          |
| PTCH1 mutation                          | Multiple                       | vismodegib                             | Trials          | Investigational          |
| PTEN deletion, mutation                 | Multiple                       | various PI3K pathway combinations      | Trials          | Investigational          |
| RET mutation                            | NSCLC, Thyroid Cancer          | ponatinib, sunitinib                   | Trials          | Investigational          |
| SMO mutation                            | Multiple                       | vismodegib                             | Trials          | Investigational          |
| STK11 mutation                          | Multiple                       | MSC-2363318A                           | Trials          | Investigational          |
| TP53 mutation                           | Multiple                       | MK-1775, MK-8242                       | Trials          | Investigational          |
| TSC1,2 mutation                         | Multiple                       | MSC-2363318A                           | Trials          | Investigational          |

OCP targeted molecular alterations associated with approved and investigational targeted therapies. Disease indications and example treatment(s) are given. Evidence indicates whether targeted therapy is associated with FDA approved labels, approved and recommended by NCCN guidelines, or whether patients with corresponding alterations are currently being enrolled in clinical trials for specified treatments.

**Table S6. Oligonucleotide primers used for qRT-PCR**

| Assay                       | 5' primer              | 3' primer             | Probe                        |
|-----------------------------|------------------------|-----------------------|------------------------------|
| TPR exon 21 / NTRK1 exon 10 | GAAGTCCAAGTTGCTTCTCAGT | TTCTTCTCCACCGGGTCTC   | ACAGAGAACTGGTAAAGACTAACAGCAC |
| ERC exon 12 / BRAF exon 9   | ACGGGAGGACAATCTCAA     | CCTCCATCACCAGAAATC    | CAAGTCCCTGTAGCTGCTGAGAGC     |
| ERC exon 12 / BRAF exon 10  | GAGGACAATCTCAACGACAG   | GTTAGTGAGCCAGGTAATGAG | CAGCAGCTACAGGGATCAACCACA     |
| GAPDH                       | CAAGGCTGAGAACGGGAAG    | CATCGCCCCACTTGATTTG   | CGCTCCTGGAAGATGGTGATGGG      |
| HMBS                        | ATACAAGAGACCATGCAGGC   | AGTGATGCCTACCAACTGTG  | TCAGGGCCATCTCATGCTGGG        |

All primers and probes are given 5' to 3'. Probes were labelled with 5' FAM/ZEN/3' IBFQ and obtained from IDT (PrimeTime dual-labeled probes).

**Table S7: OCP validation using the Acrometrix Oncology Hotspot Control**

| Type | Chr   | Pos       | Ref | Alt | Detection Type | Observed Variant |     |      | Gene    | Protein      |          | Hotspot     | Length | HRUN | Proximity to Amplicon Edge |
|------|-------|-----------|-----|-----|----------------|------------------|-----|------|---------|--------------|----------|-------------|--------|------|----------------------------|
|      |       |           |     |     |                | Allele Frequency | FAO | FDP  |         | Change       | Location |             |        |      |                            |
| SNV  | chr4  | 153249456 | C   | A   | TP             | 0.0987           | 197 | 1996 | FBXW7   | p.Arg441Leu  | exonic   | COSM161023  | 1      | 2    | 21                         |
| SNV  | chr22 | 24133967  | C   | T   | TP             | 0.2305           | 460 | 1996 | SMARCB1 | p.Arg40Ter   | exonic   |             | 1      | 2    | 14                         |
| SNV  | chr22 | 24145582  | C   | T   | TP             | 0.1725           | 345 | 2000 | SMARCB1 | p.Arg201Ter  | exonic   |             | 1      | 1    | 16                         |
| SNV  | chr7  | 116417499 | C   | G   | TP             | 0.2944           | 587 | 1994 | MET     | p.His1124Asp | exonic   |             | 1      | 1    | 43                         |
| SNV  | chr10 | 89624266  | A   | G   | TP             | 0.2565           | 513 | 2000 | PTEN    | p.Arg14Gly   | exonic   | COSM5101    | 1      | 4    | 12                         |
| SNV  | chr12 | 25378647  | T   | G   | TP             | 0.2208           | 441 | 1997 | KRAS    | p.Lys117Asn  | exonic   | COSM19940   | 1      | 3    | 11                         |
| SNV  | chr11 | 108173736 | T   | G   | TP             | 0.2337           | 467 | 1998 | ATM     | p.Leu1826Val | exonic   |             | 1      | 2    | 39                         |
| SNV  | chr4  | 153249384 | C   | T   | TP             | 0.2020           | 404 | 2000 | FBXW7   | p.Arg465His  | exonic   | COSM22965   | 1      | 1    | 29                         |
| SNV  | chr19 | 1223125   | C   | G   | TP             | 0.3127           | 516 | 1650 | STK11   | p.Phe354Leu  | exonic   | COSM21360   | 1      | 2    | 19                         |
| SNV  | chr10 | 89720874  | A   | G   | TP             | 0.2641           | 528 | 1999 | PTEN    | p.Lys342Arg  | exonic   |             | 1      | 2    | 26                         |
| SNV  | chr22 | 24143240  | C   | T   | TP             | 0.2005           | 230 | 1147 | SMARCB1 | p.Arg158Ter  | exonic   |             | 1      | 2    | 40                         |
| SNV  | chr12 | 112926908 | C   | A   | TP             | 0.2181           | 436 | 1999 | PTPN11  | p.Gln510Lys  | exonic   | COSM13031   | 1      | 3    | 53                         |
| SNV  | chr9  | 21971153  | C   | A   | TP             | 0.3183           | 636 | 1998 | CDKN2A  | p.Glu69Ter   | exonic   |             | 1      | 2    | 63                         |
| SNV  | chr12 | 25398284  | C   | T   | TP             | 0.2205           | 439 | 1991 | KRAS    | p.Gly12Asp   | exonic   | COSM521     | 1      | 2    | 20                         |
| SNV  | chr17 | 7578542   | G   | C   | TP             | 0.0670           | 96  | 1432 | TP53    | p.Leu91Val   | exonic   | COSM11462   | 1      | 3    | 21                         |
| SNV  | chr17 | 7579575   | G   | A   | TP             | 0.2210           | 442 | 2000 | TP53    |              | utr_5    |             | 1      | 3    | 20                         |
| SNV  | chr7  | 55259515  | T   | G   | TP             | 0.2041           | 408 | 1999 | EGFR    | p.Leu858Arg  | exonic   | COSM6224    | 1      | 3    | 23                         |
| SNV  | chr5  | 112173947 | C   | T   | TP             | 0.1391           | 278 | 1998 | APC     | p.Gln886Ter  | exonic   |             | 1      | 3    | 15                         |
| SNV  | chr10 | 89717696  | T   | C   | TP             | 0.3170           | 634 | 2000 | PTEN    | p.Phe241Leu  | exonic   |             | 1      | 3    | 30                         |
| SNV  | chr17 | 7577046   | C   | A   | TP             | 0.2452           | 490 | 1998 | TP53    | p.Glu259Ter  | exonic   |             | 1      | 1    | 54                         |
| SNV  | chr17 | 7576855   | G   | A   | TP             | 0.2737           | 366 | 1337 | TP53    | p.Gln292Ter  | exonic   |             | 1      | 3    | 40                         |
| SNV  | chr10 | 89624297  | A   | G   | TP             | 0.2719           | 541 | 1990 | PTEN    | p.Asp24Gly   | exonic   | COSM5107    | 1      | 2    | 27                         |
| SNV  | chr11 | 108218045 | A   | G   | TP             | 0.1241           | 248 | 1999 | ATM     | p.Asn2875Ser | exonic   | COSM1183938 | 1      | 2    | 13                         |
| SNV  | chr7  | 140453136 | A   | T   | TP             | 0.3016           | 596 | 1976 | BRAF    | p.Val600Glu  | exonic   | COSM476     | 1      | 1    | 34                         |
| SNV  | chr7  | 148508727 | T   | A   | TP             | 0.3318           | 663 | 1998 | EZH2    | p.Tyr646Phe  | exonic   | COSM37028   | 1      | 2    | 21                         |
| SNV  | chr5  | 112174726 | A   | G   | TP             | 0.2995           | 599 | 2000 | APC     | p.(=)        | exonic   |             | 1      | 2    | 18                         |
| SNV  | chr5  | 112175171 | C   | T   | TP             | 0.2875           | 575 | 2000 | APC     | p.Gln1294Ter | exonic   |             | 1      | 1    | 28                         |
| SNV  | chr7  | 55259446  | A   | T   | TP             | 0.1246           | 249 | 1998 | EGFR    | p.His835Leu  | exonic   | COSM6227    | 1      | 1    | 26                         |
| SNV  | chr9  | 133738342 | C   | G   | TP             | 0.2939           | 587 | 1997 | ABL1    | p.Leu267Val  | exonic   | COSM12631   | 1      | 2    | 36                         |
| SNV  | chr7  | 55259554  | C   | G   | TP             | 0.2716           | 543 | 1999 | EGFR    | p.Ala871Gly  | exonic   | COSM13008   | 1      | 2    | 47                         |
| SNV  | chr14 | 105246551 | C   | T   | TP             | 0.2282           | 456 | 1998 | AKT1    | p.Glu17Lys   | exonic   | COSM33765   | 1      | 4    | 32                         |
| SNV  | chr13 | 28610138  | G   | A   | TP             | 0.2275           | 455 | 2000 | FLT3    | p.Ser451Phe  | exonic   | COSM28042   | 1      | 2    | 45                         |
| SNV  | chr9  | 139390873 | G   | A   | TP             | 0.2826           | 565 | 1999 | NOTCH1  | p.Gln2440Ter | exonic   |             | 1      | 2    | 12                         |
| SNV  | chr4  | 55961023  | C   | A   | TP             | 0.1992           | 398 | 1998 | KDR     | p.Ala973Ser  | exonic   | COSM48464   | 1      | 1    | 36                         |
| SNV  | chr5  | 112175086 | A   | G   | TP             | 0.2201           | 440 | 1999 | APC     | p.(=)        | exonic   |             | 1      | 2    | 44                         |
| SNV  | chr17 | 7578449   | C   | T   | TP             | 0.2488           | 461 | 1853 | TP53    | p.Ala122Thr  | exonic   | COSM10739   | 1      | 2    | 0                          |
| SNV  | chr9  | 133748403 | A   | G   | TP             | 0.2806           | 561 | 1999 | ABL1    | p.Glu374Gly  | exonic   | COSM12611   | 1      | 4    | 14                         |
| SNV  | chr15 | 66727455  | G   | T   | TP             | 0.2356           | 377 | 1600 | MAP2K1  | p.Lys57Asn   | exonic   | OM2025      | 1      | 1    | 42                         |
| SNV  | chr13 | 49039215  | A   | T   | TP             | 0.2584           | 508 | 1966 | RB1     | p.Lys765Ter  | exonic   |             | 1      | 4    | 17                         |
| SNV  | chr11 | 108170587 | C   | G   | TP             | 0.2575           | 447 | 1736 | ATM     | p.Leu1718Val | exonic   |             | 1      | 2    | 37                         |
| SNV  | chr10 | 123274810 | T   | C   | TP             | 0.1850           | 289 | 1562 | FGFR2   | p.Thr371Ala  | exonic   |             | 1      | 1    | 25                         |
| SNV  | chr15 | 66727483  | G   | A   | TP             | 0.2356           | 380 | 1613 | MAP2K1  | p.Asp67Asn   | exonic   |             | 1      | 2    | 46                         |
| SNV  | chr4  | 55599284  | C   | T   | TP             | 0.2010           | 402 | 2000 | KIT     | p.Arg804Trp  | exonic   | COSM20402   | 1      | 2    | 4                          |
| SNV  | chr17 | 7579536   | C   | A   | TP             | 0.2178           | 435 | 1997 | TP53    | p.Glu12Ter   | exonic   |             | 1      | 3    | 41                         |
| SNV  | chr5  | 149433673 | C   | T   | TP             | 0.2684           | 511 | 1904 | CSF1R   | p.Ala960Thr  | exonic   |             | 1      | 1    | 19                         |
| SNV  | chr10 | 89685307  | T   | C   | TP             | 0.2866           | 573 | 1999 | PTEN    | p.Tyr68His   | exonic   | COSM5036    | 1      | 1    | 49                         |
| SNV  | chr17 | 37880261  | G   | T   | TP             | 0.2355           | 471 | 2000 | ERBB2   | p.Asp769Tyr  | exonic   | COSM1251412 | 1      | 1    | 49                         |
| SNV  | chr18 | 48603032  | C   | T   | TP             | 0.2035           | 407 | 2000 | SMAD4   | p.Arg445Ter  | exonic   |             | 1      | 2    | 4                          |
| SNV  | chr17 | 7577559   | G   | A   | TP             | 0.2430           | 486 | 2000 | TP53    | p.Ser202Phe  | exonic   | COSM10812   | 1      | 2    | 32                         |
| SNV  | chr7  | 55241722  | G   | A   | TP             | 0.2937           | 509 | 1733 | EGFR    | p.Gly724Ser  | exonic   | COSM13979   | 1      | 2    | 7                          |



| Type | Chr   | Pos       | Ref | Alt | Detection Type | Observed Variant |     |      | Gene   | Protein      |              | Hotspot   | Length | HRUN | Proximity to Amplicon Edge |
|------|-------|-----------|-----|-----|----------------|------------------|-----|------|--------|--------------|--------------|-----------|--------|------|----------------------------|
|      |       |           |     |     |                | Allele Frequency | FAO | FDP  |        | Change       | Location     |           |        |      |                            |
| SNV  | chr9  | 21971028  | C   | T   | TP             | 0.3275           | 373 | 1139 | CDKN2A | p.Trp110Ter  | exonic       |           | 1      | 4    | 38                         |
| SNV  | chr19 | 1220487   | G   | T   | TP             | 0.1345           | 269 | 2000 | STK11  | p.Asp194Tyr  | exonic       | COSM20944 | 1      | 1    | 7                          |
| SNV  | chr4  | 55592202  | A   | T   | TP             | 0.2086           | 417 | 1999 | KIT    | p.Lys509Ile  | exonic       | COSM96885 | 1      | 3    | 44                         |
| SNV  | chr11 | 108119823 | T   | C   | TP             | 0.2211           | 442 | 1999 | ATM    | p.Val410Ala  | exonic       | COSM21825 | 1      | 1    | 11                         |
| SNV  | chr11 | 533881    | C   | T   | TP             | 0.2337           | 467 | 1998 | HRAS   | p.Ala59Thr   | exonic       |           | 1      | 1    | 49                         |
| SNV  | chr4  | 55561764  | G   | A   | TP             | 0.1995           | 399 | 2000 | KIT    | p.Asp52Asn   | exonic       | COSM1146  | 1      | 2    | 20                         |
| SNV  | chr7  | 55221822  | C   | T   | TP             | 0.2995           | 599 | 2000 | EGFR   | p.Ala289Val  | exonic       | COSM21687 | 1      | 2    | 30                         |
| SNV  | chr17 | 7577548   | C   | T   | TP             | 0.1505           | 301 | 2000 | TP53   | p.Gly206Ser  | exonic       | COSM6932  | 1      | 2    | 21                         |
| SNV  | chr8  | 38285891  | T   | C   | TP             | 0.2997           | 599 | 1999 | FGFR1  | p.Thr174Ala  | exonic       |           | 1      | 3    | 43                         |
| SNV  | chr4  | 55597500  | T   | C   | TP             | 0.1936           | 387 | 1999 | KIT    | p.(=)        | exonic       |           | 1      | 1    | 24                         |
| SNV  | chr18 | 48591855  | A   | G   | TP             | 0.2086           | 417 | 1999 | SMAD4  | p.Lys340Glu  | exonic       |           | 1      | 2    | 41                         |
| SNV  | chr4  | 1806131   | T   | C   | TP             | 0.2007           | 280 | 1395 | FGFR3  | p.Phe386Leu  | exonic       |           | 1      | 2    | 50                         |
| SNV  | chr13 | 48941658  | A   | G   | TP             | 0.2356           | 471 | 1999 | RB1    | p.Glu323Gly  | exonic       |           | 1      | 3    | 57                         |
| SNV  | chr5  | 112175354 | T   | C   | TP             | 0.3080           | 616 | 2000 | APC    | p.Ser1355Pro | exonic       |           | 1      | 4    | 39                         |
| SNV  | chr12 | 112888165 | G   | T   | TP             | 0.2171           | 434 | 1999 | PTPN11 | p.Asp61Tyr   | exonic       | COSM13011 | 1      | 2    | 47                         |
| SNV  | chr17 | 7579442   | G   | A   | TP             | 0.2430           | 486 | 2000 | TP53   | p.Pro43Leu   | exonic       | COSM43910 | 1      | 2    | 55                         |
| SNV  | chr13 | 48941648  | C   | T   | TP             | 0.2331           | 466 | 1999 | RB1    | p.Arg320Ter  | exonic       |           | 1      | 1    | 47                         |
| SNV  | chr7  | 128846040 | G   | A   | TP             | 0.2748           | 479 | 1743 | SMO    | p.Ala324Thr  | exonic       |           | 1      | 1    | 23                         |
| SNV  | chr11 | 108236087 | G   | A   | TP             | 0.2260           | 452 | 2000 | ATM    | p.Arg3008His | exonic       | COSM21626 | 1      | 1    | 45                         |
| SNV  | chr7  | 140481478 | G   | A   | TP             | 0.2810           | 555 | 1975 | BRAF   | p.Arg444Trp  | exonic       | COSM6262  | 1      | 1    | 37                         |
| SNV  | chr19 | 1220371   | G   | T   | TP             | 0.2361           | 292 | 1237 | STK11  |              | splicesite_5 |           | 1      | 2    | 61                         |
| SNV  | chr7  | 55249143  | T   | C   | TP             | 0.4177           | 835 | 1999 | EGFR   | p.Leu814Pro  | exonic       | COSM28610 | 1      | 3    | 21                         |
| SNV  | chr17 | 37880220  | T   | C   | TP             | 0.2422           | 484 | 1998 | ERBB2  | p.Leu755Ser  | exonic       | COSM14060 | 1      | 2    | 8                          |
| SNV  | chr7  | 55221830  | G   | T   | TP             | 0.2951           | 589 | 1996 | EGFR   | p.Val292Leu  | exonic       |           | 1      | 2    | 38                         |
| SNV  | chr7  | 140453145 | A   | C   | TP             | 0.3013           | 599 | 1988 | BRAF   | p.Leu597Arg  | exonic       | COSM471   | 1      | 1    | 43                         |
| SNV  | chr7  | 55248995  | G   | A   | TP             | 0.2720           | 544 | 2000 | EGFR   | p.Val765Met  | exonic       | COSM28603 | 1      | 1    | 21                         |
| SNV  | chr4  | 55602737  | G   | A   | TP             | 0.3662           | 576 | 1573 | KIT    | p.Trp853Ter  | exonic       |           | 1      | 2    | 14                         |
| SNV  | chr5  | 112175576 | C   | T   | TP             | 0.2579           | 515 | 1997 | APC    | p.Gln1429Ter | exonic       |           | 1      | 1    | 4                          |
| SNV  | chr4  | 153247351 | C   | A   | TP             | 0.1866           | 373 | 1999 | FBXW7  | p.Arg484Met  | exonic       |           | 1      | 3    | 18                         |
| SNV  | chr18 | 48604769  | C   | A   | TP             | 0.1918           | 383 | 1997 | SMAD4  | p.(=)        | exonic       |           | 1      | 2    | 5                          |
| SNV  | chr7  | 128845101 | C   | T   | TP             | 0.2815           | 563 | 2000 | SMO    | p.Arg199Trp  | exonic       | COSM13145 | 1      | 3    | 38                         |
| SNV  | chr4  | 1806089   | G   | T   | TP             | 0.1973           | 276 | 1399 | FGFR3  | p.Gly372Cys  | exonic       | COSM716   | 1      | 3    | 8                          |
| SNV  | chr13 | 28602329  | G   | A   | TP             | 0.2241           | 441 | 1968 | FLT3   | p.Ala680Val  | exonic       | COSM786   | 1      | 1    | 50                         |
| SNV  | chr10 | 123258034 | A   | T   | TP             | 0.2489           | 497 | 1997 | FGFR2  | p.Asn550Lys  | exonic       | COSM36912 | 1      | 4    | 11                         |
| SNV  | chr9  | 21971017  | G   | A   | TP             | 0.3275           | 373 | 1139 | CDKN2A | p.Pro114Leu  | exonic       | COSM12476 | 1      | 3    | 49                         |
| SNV  | chr7  | 55211080  | G   | A   | TP             | 0.3030           | 606 | 2000 | EGFR   | p.Arg108Lys  | exonic       | COSM21683 | 1      | 3    | 36                         |
| SNV  | chr9  | 133747520 | A   | G   | TP             | 0.2941           | 588 | 1999 | ABL1   | p.Asp295Gly  | exonic       | COSM12602 | 1      | 3    | 10                         |
| SNV  | chr16 | 68855934  | T   | C   | TP             | 0.0719           | 121 | 1684 | CDH1   | p.Leu581Pro  | exonic       |           | 1      | 2    | 15                         |
| SNV  | chr10 | 89624275  | C   | T   | TP             | 0.2725           | 545 | 2000 | PTEN   | p.Gln17Ter   | exonic       |           | 1      | 2    | 21                         |
| SNV  | chr4  | 55955112  | C   | T   | TP             | 0.2060           | 411 | 1995 | KDR    | p.Gly1145Arg | exonic       |           | 1      | 4    | 34                         |
| SNV  | chr9  | 139397768 | A   | G   | TP             | 0.2609           | 521 | 1997 | NOTCH1 | p.Leu1678Pro | exonic       | COSM13048 | 1      | 3    | 6                          |
| SNV  | chr17 | 7578203   | C   | T   | TP             | 0.2474           | 494 | 1997 | TP53   | p.Val177Met  | exonic       | COSM10667 | 1      | 1    | 59                         |
| SNV  | chr7  | 55249077  | T   | C   | TP             | 0.2769           | 553 | 1997 | EGFR   | p.Leu792Pro  | exonic       |           | 1      | 3    | 23                         |
| SNV  | chr10 | 89690847  | G   | A   | TP             | 0.2971           | 594 | 1999 | PTEN   |              | splicesite_3 |           | 1      | 2    | 30                         |
| SNV  | chr10 | 123279503 | T   | C   | TP             | 0.2410           | 482 | 2000 | FGFR2  | p.Lys310Arg  | exonic       |           | 1      | 3    | 41                         |
| SNV  | chr7  | 55259439  | T   | G   | TP             | 0.1301           | 260 | 1999 | EGFR   | p.Leu833Val  | exonic       | COSM13424 | 1      | 2    | 19                         |
| SNV  | chr7  | 55242433  | G   | A   | TP             | 0.2871           | 574 | 1999 | EGFR   | p.Gly735Ser  | exonic       | COSM13182 | 1      | 3    | 22                         |
| SNV  | chr4  | 1803575   | C   | T   | TP             | 0.1961           | 392 | 1999 | FGFR3  | p.(=)        | exonic       |           | 1      | 2    | 24                         |
| SNV  | chr11 | 108205769 | G   | C   | TP             | 0.2262           | 452 | 1998 | ATM    | p.Gly2695Ala | exonic       | COSM21636 | 1      | 2    | 38                         |
| SNV  | chr10 | 123279519 | C   | T   | TP             | 0.2250           | 450 | 2000 | FGFR2  | p.Gly305Arg  | exonic       |           | 1      | 3    | 25                         |
| SNV  | chr12 | 25398207  | C   | A   | TP             | 0.2236           | 446 | 1995 | KRAS   |              | splicesite_3 |           | 1      | 2    | 21                         |
| SNV  | chr4  | 1803568   | C   | G   | TP             | 0.1866           | 373 | 1999 | FGFR3  | p.Ser249Cys  | exonic       | COSM715   | 1      | 4    | 17                         |

| Type | Chr   | Pos       | Ref | Alt | Observed Variant |                  |     |      | Protein |              |              | Hotspot     | Length | HRUN | Proximity to Amplicon Edge |
|------|-------|-----------|-----|-----|------------------|------------------|-----|------|---------|--------------|--------------|-------------|--------|------|----------------------------|
|      |       |           |     |     | Detection Type   | Allele Frequency | FAO | FDP  | Gene    | Change       | Location     |             |        |      |                            |
| SNV  | chr7  | 55241708  | G   | C   | TP               | 0.2931           | 513 | 1750 | EGFR    | p.Gly719Ala  | exonic       | COSM6239    | 1      | 3    | 21                         |
| SNV  | chr10 | 123279677 | G   | C   | TP               | 0.2265           | 392 | 1731 | FGFR2   | p.Ser252Trp  | exonic       | COSM36903   | 1      | 2    | 36                         |
| SNV  | chr19 | 17948009  | G   | A   | TP               | 0.2202           | 440 | 1998 | JAK3    | p.Ala572Val  | exonic       |             | 1      | 1    | 23                         |
| SNV  | chr12 | 112888189 | G   | A   | TP               | 0.2095           | 419 | 2000 | PTPN11  | p.Glu69Lys   | exonic       | COSM13013   | 1      | 4    | 39                         |
| SNV  | chr12 | 25398215  | G   | A   | TP               | 0.2150           | 429 | 1995 | KRAS    | p.Thr35Ile   | exonic       |             | 1      | 1    | 29                         |
| SNV  | chr18 | 48581229  | C   | A   | TP               | 0.2285           | 457 | 2000 | SMAD4   | p.Ser178Ter  | exonic       |             | 1      | 3    | 39                         |
| SNV  | chr11 | 534288    | C   | A   | TP               | 0.2164           | 198 | 915  | HRAS    | p.Gly12Val   | exonic       | COSM483     | 1      | 2    | 20                         |
| SNV  | chr7  | 140481428 | T   | C   | TP               | 0.2931           | 582 | 1986 | BRAF    | p.(=)        | exonic       |             | 1      | 4    | 37                         |
| SNV  | chr11 | 533874    | T   | C   | TP               | 0.2337           | 467 | 1998 | HRAS    | p.Gln61Arg   | exonic       | COSM499     | 1      | 3    | 56                         |
| SNV  | chr12 | 121431428 | A   | C   | TP               | 0.2291           | 331 | 1445 | HNF1A   | p.Gln211Pro  | exonic       |             | 1      | 4    | 31                         |
| SNV  | chr5  | 112175945 | G   | T   | TP               | 0.3082           | 616 | 1999 | APC     | p.Glu1552Ter | exonic       |             | 1      | 1    | 25                         |
| SNV  | chr11 | 108236203 | C   | T   | TP               | 0.2506           | 501 | 1999 | ATM     | p.Arg3047Ter | exonic       |             | 1      | 2    | 17                         |
| SNV  | chr17 | 7576883   | T   | C   | TP               | 0.2720           | 361 | 1327 | TP53    | p.(=)        | exonic       |             | 1      | 3    | 38                         |
| SNV  | chr16 | 68846087  | A   | G   | TP               | 0.2143           | 427 | 1993 | CDH1    | p.Glu353Gly  | exonic       |             | 1      | 6    | 63                         |
| SNV  | chr17 | 7578442   | T   | C   | TP               | 0.2474           | 459 | 1855 | TP53    | p.Tyr124Cys  | exonic       | COSM10808   | 1      | 1    | 66                         |
| SNV  | chr17 | 7579553   | A   | G   | TP               | 0.2225           | 445 | 2000 | TP53    | p.Leu6Pro    | exonic       |             | 1      | 2    | 42                         |
| SNV  | chr4  | 153258983 | G   | A   | TP               | 0.1871           | 374 | 1999 | FBXW7   | p.Arg278Ter  | exonic       |             | 1      | 1    | 41                         |
| SNV  | chr18 | 48575183  | T   | C   | TP               | 0.2233           | 446 | 1997 | SMAD4   | p.Val126Ala  | exonic       |             | 1      | 2    | 30                         |
| SNV  | chr10 | 89711997  | G   | A   | TP               | 0.2808           | 561 | 1998 | PTEN    | p.Met205Ile  | exonic       |             | 1      | 1    | 24                         |
| SNV  | chr12 | 112926899 | A   | G   | TP               | 0.2186           | 437 | 1999 | PTPN11  | p.Thr507Ala  | exonic       |             | 1      | 2    | 62                         |
| SNV  | chr12 | 112888210 | G   | A   | TP               | 0.2150           | 430 | 2000 | PTPN11  | p.Glu76Lys   | exonic       | COSM13000   | 1      | 2    | 18                         |
| SNV  | chr11 | 108170479 | G   | T   | TP               | 0.2306           | 461 | 1999 | ATM     | p.Asp1682Tyr | exonic       | COSM21920   | 1      | 1    | 23                         |
| SNV  | chr13 | 49039189  | A   | G   | TP               | 0.2610           | 518 | 1985 | RB1     | p.Tyr756Cys  | exonic       |             | 1      | 1    | 40                         |
| SNV  | chr13 | 28592629  | T   | C   | TP               | 0.2654           | 530 | 1997 | FLT3    | p.Asp839Gly  | exonic       | COSM1166729 | 1      | 2    | 34                         |
| SNV  | chr9  | 139399350 | C   | G   | TP               | 0.2299           | 266 | 1157 | NOTCH1  | p.Arg1598Pro | exonic       | COSM13053   | 1      | 4    | 13                         |
| SNV  | chr17 | 7578461   | C   | A   | TP               | 0.2603           | 487 | 1871 | TP53    | p.Val118Phe  | exonic       | COSM10670   | 1      | 2    | 12                         |
| SNV  | chr15 | 90631838  | C   | T   | TP               | 0.2235           | 447 | 2000 | IDH2    | p.Arg172Lys  | exonic       | COSM33733   | 1      | 2    | 14                         |
| SNV  | chr13 | 49039183  | T   | G   | TP               | 0.2605           | 516 | 1981 | RB1     | p.Val754Gly  | exonic       |             | 1      | 2    | 34                         |
| SNV  | chr8  | 38285938  | G   | A   | TP               | 0.2801           | 560 | 1999 | FGFR1   | p.Ser158Leu  | exonic       |             | 1      | 2    | 7                          |
| SNV  | chr12 | 112888199 | C   | T   | TP               | 0.2271           | 454 | 1999 | PTPN11  | p.Ala72Val   | exonic       | COSM13015   | 1      | 2    | 29                         |
| SNV  | chr11 | 108138003 | T   | C   | TP               | 0.2376           | 475 | 1999 | ATM     | p.Phe858Leu  | exonic       | COSM21826   | 1      | 3    | 22                         |
| SNV  | chr4  | 55979623  | C   | A   | TP               | 0.2317           | 279 | 1204 | KDR     | p.Arg275Leu  | exonic       |             | 1      | 1    | 32                         |
| SNV  | chr17 | 7577580   | T   | C   | TP               | 0.2419           | 483 | 1997 | TP53    | p.Tyr195Cys  | exonic       | COSM10725   | 1      | 1    | 53                         |
| SNV  | chr10 | 43609096  | T   | C   | TP               | 0.2845           | 569 | 2000 | RET     | p.Cys618Arg  | exonic       | COSM29803   | 1      | 1    | 30                         |
| SNV  | chr13 | 28608281  | A   | G   | TP               | 0.2125           | 425 | 2000 | FLT3    | p.Val592Ala  | exonic       |             | 1      | 2    | 54                         |
| SNV  | chr4  | 55593661  | T   | C   | TP               | 0.1939           | 384 | 1980 | KIT     | p.Leu576Pro  | exonic       | COSM1290    | 1      | 2    | 34                         |
| SNV  | chr10 | 89711960  | T   | C   | TP               | 0.2894           | 578 | 1997 | PTEN    | p.Leu193Pro  | exonic       |             | 1      | 2    | 46                         |
| SNV  | chr18 | 48575195  | C   | T   | TP               | 0.2241           | 448 | 1999 | SMAD4   | p.Pro130Leu  | exonic       |             | 1      | 2    | 18                         |
| SNV  | chr12 | 112926852 | C   | T   | TP               | 0.2157           | 431 | 1998 | PTPN11  | p.Pro491Leu  | exonic       | COSM13034   | 1      | 3    | 17                         |
| SNV  | chr17 | 7572986   | G   | A   | TP               | 0.2346           | 450 | 1918 | TP53    | p.Gln336Ter  | exonic       |             | 1      | 2    | 35                         |
| SNV  | chr10 | 89624245  | G   | T   | TP               | 0.2535           | 507 | 2000 | PTEN    | p.Glu7Ter    | exonic       |             | 1      | 1    | 38                         |
| SNV  | chr9  | 80412518  | T   | A   | TP               | 0.2736           | 547 | 1999 | GNAQ    | p.Thr175Ser  | exonic       |             | 1      | 2    | 27                         |
| SNV  | chr17 | 37881378  | A   | G   | TP               | 0.2411           | 482 | 1999 | ERBB2   | p.Asn857Ser  | exonic       |             | 1      | 2    | 37                         |
| SNV  | chr18 | 48575209  | C   | T   | TP               | 0.2246           | 449 | 1999 | SMAD4   | p.Arg135Ter  | exonic       |             | 1      | 1    | 4                          |
| SNV  | chr11 | 108206594 | A   | T   | TP               | 0.2175           | 431 | 1982 | ATM     | p.Asp2725Val | exonic       | COSM22481   | 1      | 2    | 34                         |
| SNV  | chr10 | 89653844  | A   | G   | TP               | 0.1002           | 88  | 878  | PTEN    | p.Asn48Asp   | exonic       | COSM5050    | 1      | 3    | 25                         |
| SNV  | chr17 | 7573010   | T   | C   | TP               | 0.2343           | 449 | 1916 | TP53    |              | splicesite_5 |             | 1      | 2    | 11                         |
| SNV  | chr17 | 7574026   | C   | A   | TP               | 0.2205           | 441 | 2000 | TP53    | p.Gly295Val  | exonic       | COSM11514   | 1      | 3    | 42                         |
| SNV  | chr18 | 48575112  | T   | C   | TP               | 0.2186           | 437 | 1999 | SMAD4   | p.(=)        | exonic       |             | 1      | 3    | 13                         |
| SNV  | chr5  | 112174043 | G   | T   | TP               | 0.2705           | 541 | 2000 | APC     | p.Glu918Ter  | exonic       |             | 1      | 2    | 26                         |
| SNV  | chr5  | 112175423 | C   | T   | TP               | 0.3067           | 613 | 1999 | APC     | p.Gln1378Ter | exonic       |             | 1      | 3    | 20                         |
| SNV  | chr5  | 112174577 | C   | T   | TP               | 0.2941           | 588 | 1999 | APC     | p.Gln1096Ter | exonic       |             | 1      | 1    | 1                          |

| Type | Chr   | Pos       | Ref | Alt | Observed Variant |                  |     |      | Protein |              |              | Hotspot     | Length | HRUN | Proximity to Amplicon Edge |
|------|-------|-----------|-----|-----|------------------|------------------|-----|------|---------|--------------|--------------|-------------|--------|------|----------------------------|
|      |       |           |     |     | Detection Type   | Allele Frequency | FAO | FDP  | Gene    | Change       | Location     |             |        |      |                            |
| SNV  | chr17 | 7577120   | C   | T   | TP               | 0.2040           | 408 | 2000 | TP53    | p.Arg234His  | exonic       | COSM10660   | 1      | 1    | 34                         |
| SNV  | chr9  | 21971111  | G   | A   | TP               | 0.3192           | 638 | 1999 | CDKN2A  | p.His83Tyr   | exonic       | COSM12504   | 1      | 1    | 21                         |
| SNV  | chr10 | 89711992  | C   | A   | TP               | 0.2791           | 558 | 1999 | PTEN    | p.Pro204Thr  | exonic       | COSM5279    | 1      | 2    | 29                         |
| SNV  | chr10 | 89725108  | C   | G   | TP               | 0.2939           | 587 | 1997 | PTEN    | p.Ser364Cys  | exonic       |             | 1      | 1    | 40                         |
| SNV  | chr5  | 112174596 | A   | G   | TP               | 0.2935           | 587 | 2000 | APC     | p.Tyr1102Cys | exonic       |             | 1      | 1    | 39                         |
| SNV  | chr12 | 121432040 | C   | T   | TP               | 0.2006           | 400 | 1994 | HNF1A   | p.Arg263Cys  | exonic       | COSM24692   | 1      | 1    | 30                         |
| SNV  | chr10 | 89717678  | G   | T   | TP               | 0.2963           | 592 | 1998 | PTEN    | p.Glu235Ter  | exonic       |             | 1      | 3    | 1                          |
| SNV  | chr7  | 140481417 | C   | A   | TP               | 0.2796           | 555 | 1985 | BRAF    | p.Gly464Val  | exonic       | COSM450     | 1      | 2    | 26                         |
| SNV  | chr15 | 90631879  | T   | C   | TP               | 0.2187           | 436 | 1994 | IDH2    | p.(=)        | exonic       |             | 1      | 1    | 55                         |
| SNV  | chr7  | 116417465 | T   | C   | TP               | 0.2106           | 421 | 1999 | MET     | p.(=)        | exonic       |             | 1      | 1    | 23                         |
| SNV  | chr4  | 153249440 | C   | T   | TP               | 0.2008           | 401 | 1997 | FBXW7   | p.Trp446Ter  | exonic       |             | 1      | 3    | 37                         |
| SNV  | chr17 | 7578535   | T   | C   | TP               | 0.0658           | 95  | 1444 | TP53    | p.Lys93Arg   | exonic       | COSM11582   | 1      | 2    | 28                         |
| SNV  | chr11 | 108205780 | C   | A   | TP               | 0.2245           | 449 | 2000 | ATM     | p.Pro2699Thr | exonic       | COSM1235404 | 1      | 2    | 36                         |
| SNV  | chr11 | 108117798 | C   | T   | TP               | 0.2095           | 323 | 1542 | ATM     | p.Arg337Cys  | exonic       | COSM21323   | 1      | 4    | 33                         |
| SNV  | chr7  | 55233043  | G   | T   | TP               | 0.3045           | 609 | 2000 | EGFR    | p.Gly598Val  | exonic       | COSM21690   | 1      | 2    | 10                         |
| SNV  | chr16 | 68855966  | G   | A   | TP               | 0.0694           | 116 | 1671 | CDH1    | p.Ala592Thr  | exonic       | COSM19758   | 1      | 1    | 47                         |
| SNV  | chr18 | 48575671  | C   | G   | TP               | 0.2586           | 517 | 1999 | SMAD4   | p.Ser144Ter  | exonic       |             | 1      | 1    | 6                          |
| SNV  | chr20 | 57484420  | C   | T   | TP               | 0.2592           | 232 | 895  | GNAS    | p.Arg844Cys  | exonic       | COSM27887   | 1      | 2    | 24                         |
| SNV  | chr10 | 89692818  | T   | C   | TP               | 0.1546           | 309 | 1999 | PTEN    | p.Ile101Thr  | exonic       | COSM5109    | 1      | 2    | 5                          |
| SNV  | chr11 | 108173640 | C   | T   | TP               | 0.1987           | 397 | 1998 | ATM     | p.(=)        | exonic       |             | 1      | 3    | 10                         |
| SNV  | chr9  | 21971000  | C   | A   | TP               | 0.3274           | 367 | 1121 | CDKN2A  | p.Glu120Ter  | exonic       |             | 1      | 2    | 60                         |
| SNV  | chr13 | 48919244  | G   | T   | TP               | 0.2320           | 462 | 1991 | RB1     | p.Glu137Ter  | exonic       |             | 1      | 1    | 43                         |
| SNV  | chr11 | 108155132 | G   | A   | TP               | 0.2518           | 503 | 1998 | ATM     | p.Ala1309Thr | exonic       |             | 1      | 2    | 10                         |
| SNV  | chr7  | 128851593 | A   | G   | TP               | 0.2573           | 494 | 1920 | SMO     | p.Thr640Ala  | exonic       |             | 1      | 1    | 19                         |
| SNV  | chr22 | 24145588  | G   | A   | TP               | 0.1783           | 356 | 1997 | SMARCB1 | p.Ala203Thr  | exonic       |             | 1      | 1    | 10                         |
| SNV  | chr18 | 48593405  | G   | C   | TP               | 0.2027           | 330 | 1628 | SMAD4   | p.Gly386Arg  | exonic       |             | 1      | 2    | 6                          |
| SNV  | chr13 | 49037877  | G   | T   | TP               | 0.2805           | 561 | 2000 | RB1     | p.Cys706Phe  | exonic       |             | 1      | 4    | 31                         |
| SNV  | chr9  | 139397776 | G   | A   | TP               | 0.2630           | 526 | 2000 | NOTCH1  | p.(=)        | exonic       |             | 1      | 2    | 14                         |
| SNV  | chr11 | 108172421 | G   | C   | TP               | 0.2420           | 484 | 2000 | ATM     | p.Ala1742Pro | exonic       |             | 1      | 3    | 46                         |
| SNV  | chr7  | 55242427  | C   | T   | TP               | 0.2866           | 573 | 1999 | EGFR    | p.Pro733Ser  | exonic       | COSM53194   | 1      | 3    | 16                         |
| SNV  | chr16 | 68856041  | G   | A   | TP               | 0.2405           | 481 | 2000 | CDH1    | p.Ala617Thr  | exonic       |             | 1      | 1    | 30                         |
| SNV  | chr10 | 123274794 | T   | C   | TP               | 0.1865           | 293 | 1571 | FGFR2   | p.Tyr376Cys  | exonic       | COSM36904   | 1      | 1    | 41                         |
| SNV  | chr7  | 55249131  | G   | A   | TP               | 0.3885           | 777 | 2000 | EGFR    | p.Gly810Asp  | exonic       | COSM12986   | 1      | 2    | 9                          |
| SNV  | chr9  | 139390779 | G   | T   | TP               | 0.2880           | 385 | 1337 | NOTCH1  | p.Ser2471Ter | exonic       |             | 1      | 1    | 15                         |
| SNV  | chr4  | 55592211  | A   | G   | TP               | 0.2115           | 423 | 2000 | KIT     | p.Asn512Ser  | exonic       |             | 1      | 2    | 35                         |
| SNV  | chr7  | 55211097  | G   | A   | TP               | 0.2940           | 588 | 2000 | EGFR    | p.Glu114Lys  | exonic       |             | 1      | 5    | 29                         |
| SNV  | chr4  | 55152112  | C   | A   | TP               | 0.1995           | 399 | 2000 | PDGFRA  | p.Asn848Lys  | exonic       |             | 1      | 3    | 42                         |
| SNV  | chr12 | 25380283  | C   | T   | TP               | 0.6240           | 692 | 1109 | KRAS    | p.Ala59Thr   | exonic       | COSM546     | 1      | 2    | 23                         |
| SNV  | chr9  | 21971120  | G   | A   | TP               | 0.3105           | 621 | 2000 | CDKN2A  | p.Arg80Ter   | exonic       |             | 1      | 3    | 30                         |
| SNV  | chr13 | 49027249  | T   | C   | TP               | 0.2349           | 373 | 1588 | RB1     |              | splicesite_3 |             | 1      | 1    | 16                         |
| SNV  | chr11 | 108123641 | T   | A   | TP               | 0.2159           | 431 | 1996 | ATM     |              | splicesite_3 |             | 1      | 2    | 29                         |
| SNV  | chr7  | 55259457  | G   | A   | TP               | 0.1275           | 255 | 2000 | EGFR    | p.Ala839Thr  | exonic       | COSM13430   | 1      | 2    | 37                         |
| SNV  | chr7  | 55241644  | G   | A   | TP               | 0.2991           | 510 | 1705 | EGFR    | p.Ala698Thr  | exonic       |             | 1      | 3    | 9                          |
| SNV  | chr5  | 112175852 | G   | T   | TP               | 0.2846           | 569 | 1999 | APC     | p.Glu1521Ter | exonic       |             | 1      | 2    | 49                         |
| SNV  | chr19 | 1220382   | C   | T   | TP               | 0.1368           | 272 | 1989 | STK11   | p.Gln159Ter  | exonic       |             | 1      | 2    | 8                          |
| SNV  | chr9  | 133738363 | G   | A   | TP               | 0.2785           | 557 | 2000 | ABL1    | p.Glu274Lys  | exonic       | COSM12573   | 1      | 4    | 15                         |
| SNV  | chr9  | 133750319 | C   | A   | TP               | 0.2718           | 542 | 1994 | ABL1    | p.Leu403Met  | exonic       | COSM49071   | 1      | 2    | 12                         |
| SNV  | chr5  | 112175432 | C   | T   | TP               | 0.3035           | 607 | 2000 | APC     | p.Pro1381Ser | exonic       |             | 1      | 4    | 11                         |
| SNV  | chr4  | 153244124 | G   | C   | TP               | 0.0568           | 113 | 1989 | FBXW7   | p.Ser678Ter  | exonic       |             | 1      | 1    | 28                         |
| SNV  | chr4  | 1806153   | C   | A   | TP               | 0.1996           | 279 | 1398 | FGFR3   | p.Ala393Glu  | exonic       | COSM721     | 1      | 1    | 34                         |
| SNV  | chr10 | 43613840  | G   | C   | TP               | 0.2815           | 563 | 2000 | RET     | p.Glu768Asp  | exonic       | COSM21338   | 1      | 2    | 46                         |
| SNV  | chr10 | 89653858  | T   | C   | TP               | 0.1027           | 90  | 876  | PTEN    | p.(=)        | exonic       |             | 1      | 1    | 39                         |

| Type | Chr   | Pos       | Ref | Alt | Observed Variant |                  |     |      | Protein |                             |          | Hotspot   | Length | HRUN | Proximity to Amplicon Edge |
|------|-------|-----------|-----|-----|------------------|------------------|-----|------|---------|-----------------------------|----------|-----------|--------|------|----------------------------|
|      |       |           |     |     | Detection Type   | Allele Frequency | FAO | FDP  | Gene    | Change                      | Location |           |        |      |                            |
| SNV  | chr9  | 133748414 | T   | G   | TP               | 0.2611           | 522 | 1999 | ABL1    | p.Phe378Val                 | exonic   | COSM12605 | 1      | 2    | 3                          |
| SNV  | chr9  | 133750356 | A   | G   | TP               | 0.2661           | 532 | 1999 | ABL1    | p.His415Arg                 | exonic   | COSM12604 | 1      | 1    | 49                         |
| SNV  | chr13 | 49037913  | A   | G   | TP               | 0.2791           | 558 | 1999 | RB1     | p.Asp718Gly                 | exonic   |           | 1      | 2    | 19                         |
| SNV  | chr10 | 123274774 | A   | G   | TP               | 0.1885           | 297 | 1576 | FGFR2   | p.Cys383Arg                 | exonic   | COSM36906 | 1      | 2    | 53                         |
| SNV  | chr13 | 48955571  | T   | C   | TP               | 0.2226           | 354 | 1590 | RB1     | p.Trp563Arg                 | exonic   |           | 1      | 1    | 34                         |
| SNV  | chr10 | 89717762  | A   | T   | TP               | 0.3202           | 640 | 1999 | PTEN    | p.Lys263Ter                 | exonic   |           | 1      | 2    | 18                         |
| SNV  | chr17 | 7578196   | A   | T   | TP               | 0.2570           | 514 | 2000 | TP53    | p.Val179Glu                 | exonic   | COSM44317 | 1      | 1    | 52                         |
| SNV  | chr17 | 7578190   | T   | C   | TP               | 0.2639           | 527 | 1997 | TP53    | p.Tyr181Cys                 | exonic   | COSM10758 | 1      | 1    | 46                         |
| SNV  | chr15 | 90631934  | C   | T   | TP               | 0.2340           | 468 | 2000 | IDH2    | p.Arg140Gln                 | exonic   | COSM41590 | 1      | 2    | 20                         |
| SNV  | chr17 | 7574018   | G   | A   | TP               | 0.2160           | 432 | 2000 | TP53    | p.Arg298Cys                 | exonic   | COSM11071 | 1      | 1    | 42                         |
| SNV  | chr11 | 108218089 | C   | G   | TP               | 0.2133           | 426 | 1997 | ATM     | p.Leu2890Val                | exonic   | COSM22485 | 1      | 1    | 55                         |
| SNV  | chr13 | 48955550  | C   | T   | TP               | 0.2233           | 357 | 1599 | RB1     | p.Arg556Ter                 | exonic   |           | 1      | 2    | 25                         |
| SNV  | chr8  | 38285864  | G   | A   | TP               | 0.3048           | 609 | 1998 | FGFR1   |                             | intronic |           | 1      | 1    | 16                         |
| SNV  | chr18 | 48586291  | G   | C   | TP               | 0.2237           | 447 | 1998 | SMAD4   |                             | intronic |           | 1      | 1    | 40                         |
| SNV  | chr9  | 139399365 | A   | G   | TP               | 0.2357           | 276 | 1171 | NOTCH1  | p.Leu1593Pro                | exonic   | COSM13042 | 1      | 3    | 28                         |
| SNV  | chr4  | 153247366 | C   | T   | TP               | 0.1886           | 377 | 1999 | FBXW7   | p.Arg479Gln                 | exonic   | COSM22974 | 1      | 2    | 3                          |
| SNV  | chr4  | 1807869   | A   | G   | TP               | 0.1121           | 109 | 972  | FGFR3   | p.His645Arg                 | exonic   |           | 1      | 1    | 36                         |
| SNV  | chr4  | 55152093  | A   | T   | TP               | 0.1800           | 351 | 1950 | PDGFRA  | p.Asp842Val                 | exonic   | COSM736   | 1      | 1    | 61                         |
| SNV  | chr4  | 1806119   | G   | A   | TP               | 0.2004           | 280 | 1397 | FGFR3   | p.Gly382Arg                 | exonic   | COSM24842 | 1      | 4    | 38                         |
| SNV  | chr17 | 7579368   | A   | C   | TP               | 0.2262           | 452 | 1998 | TP53    | p.Tyr68Asp                  | exonic   | COSM46103 | 1      | 1    | 28                         |
| SNV  | chr4  | 1808962   | A   | C   | TP               | 0.1657           | 331 | 1998 | FGFR3   | p.(=)                       | exonic   |           | 1      | 8    | 16                         |
| SNV  | chr13 | 48923148  | T   | A   | TP               | 0.2496           | 458 | 1835 | RB1     | p.Leu199Ter                 | exonic   |           | 1      | 5    | 9                          |
| SNV  | chr5  | 112176117 | C   | T   | TP               | 0.2936           | 587 | 1999 | APC     | p.Pro1609Leu                | exonic   |           | 1      | 2    | 54                         |
| SNV  | chr13 | 28592653  | C   | T   | TP               | 0.2566           | 513 | 1999 | FLT3    | p.Gly831Glu                 | exonic   |           | 1      | 2    | 10                         |
| SNV  | chr4  | 55946171  | G   | A   | TP               | 0.3081           | 379 | 1230 | KDR     | p.(=)                       | exonic   |           | 1      | 2    | 37                         |
| SNV  | chr19 | 3118942   | A   | T   | TP               | 0.1949           | 214 | 1098 | GNA11   | p.Gln209Leu                 | exonic   | COSM52969 | 1      | 1    | 31                         |
| SNV  | chr9  | 80412493  | C   | T   | TP               | 0.2713           | 541 | 1994 | GNAQ    | p.Arg183Gln                 | exonic   | COSM52975 | 1      | 2    | 40                         |
| SNV  | chr4  | 55592192  | T   | C   | TP               | 0.2145           | 429 | 2000 | KIT     | p.Phe506Leu                 | exonic   |           | 1      | 3    | 35                         |
| SNV  | chr7  | 55259427  | G   | A   | TP               | 0.1295           | 259 | 2000 | EGFR    | p.Glu829Lys                 | exonic   |           | 1      | 2    | 7                          |
| SNV  | chr10 | 43617416  | T   | C   | TP               | 0.2566           | 513 | 1999 | RET     | p.Met918Thr                 | exonic   | COSM965   | 1      | 1    | 17                         |
| SNV  | chr18 | 48584560  | C   | T   | TP               | 0.2191           | 438 | 1999 | SMAD4   | p.Gln245Ter                 | exonic   |           | 1      | 2    | 9                          |
| SNV  | chr9  | 5073781   | C   | A   | TP               | 0.2851           | 570 | 1999 | JAK2    | p.Asp620Glu                 | exonic   |           | 1      | 2    | 52                         |
| SNV  | chr10 | 43609990  | G   | A   | TP               | 0.2119           | 368 | 1737 | RET     | p.Val648Ile                 | exonic   |           | 1      | 1    | 20                         |
| SNV  | chr8  | 38282147  | G   | A   | TP               | 0.2888           | 577 | 1998 | FGFR1   | p.(=)                       | exonic   |           | 1      | 1    | 7                          |
| SNV  | chr12 | 112926888 | G   | C   | TP               | 0.2116           | 423 | 1999 | PTPN11  | p.Gly503Ala                 | exonic   | COSM13027 | 1      | 3    | 53                         |
| SNV  | chr9  | 139399422 | A   | G   | TP               | 0.2379           | 275 | 1156 | NOTCH1  | p.Leu1574Pro                | exonic   | COSM12772 | 1      | 2    | 25                         |
| SNV  | chr17 | 7578235   | T   | C   | TP               | 0.2393           | 475 | 1985 | TP53    | p.Tyr166Cys                 | exonic   | COSM43947 | 1      | 1    | 32                         |
| SNV  | chr19 | 17945696  | C   | T   | TP               | 0.2215           | 443 | 2000 | JAK3    | p.Val722Ile                 | exonic   |           | 1      | 1    | 38                         |
| SNV  | chr9  | 21971036  | C   | A   | TP               | 0.3301           | 374 | 1133 | CDKN2A  | p.Asp108Tyr                 | exonic   | COSM13489 | 1      | 1    | 30                         |
| SNV  | chr10 | 89720728  | A   | G   | TP               | 0.2837           | 433 | 1526 | PTEN    | p.(=)                       | exonic   |           | 1      | 3    | 19                         |
| SNV  | chr13 | 48953760  | C   | T   | TP               | 0.2340           | 468 | 2000 | RB1     | p.Arg455Ter                 | exonic   |           | 1      | 2    | 10                         |
| SNV  | chr17 | 7579358   | C   | A   | TP               | 0.2370           | 474 | 2000 | TP53    | p.Arg71Leu                  | exonic   | COSM10716 | 1      | 2    | 38                         |
| MNV  | chr9  | 80409432  | ACA | TGC | TP               | 0.3266           | 650 | 1990 | GNAQ    | p.Met227_Phe228delinsSerIle | exonic   |           | 3      | 3    | 57                         |
| SNV  | chr12 | 25398295  | T   | C   | TP               | 0.2180           | 434 | 1991 | KRAS    | p.(=)                       | exonic   |           | 1      | 2    | 9                          |
| SNV  | chr16 | 68846137  | G   | C   | TP               | 0.2085           | 417 | 2000 | CDH1    | p.Asp370His                 | exonic   | COSM19748 | 1      | 2    | 14                         |
| SNV  | chr18 | 48581198  | G   | T   | TP               | 0.2270           | 454 | 2000 | SMAD4   | p.Gly168Ter                 | exonic   |           | 1      | 3    | 8                          |
| SNV  | chr18 | 48604697  | A   | G   | TP               | 0.2001           | 400 | 1999 | SMAD4   | p.Lys507Glu                 | exonic   |           | 1      | 3    | 39                         |
| SNV  | chr10 | 89725072  | A   | G   | TP               | 0.3238           | 647 | 1998 | PTEN    | p.Glu352Gly                 | exonic   |           | 1      | 4    | 49                         |
| SNV  | chr17 | 7574012   | C   | A   | TP               | 0.2180           | 436 | 2000 | TP53    | p.Glu300Ter                 | exonic   |           | 1      | 1    | 36                         |
| SNV  | chr18 | 48584593  | C   | T   | TP               | 0.2247           | 449 | 1998 | SMAD4   | p.Gln256Ter                 | exonic   |           | 1      | 2    | 42                         |

| Type | Chr   | Pos       | Ref | Alt | Observed Variant |                  |     |      | Protein |              |              | Hotspot   | Length | HRUN | Proximity to Amplicon Edge |
|------|-------|-----------|-----|-----|------------------|------------------|-----|------|---------|--------------|--------------|-----------|--------|------|----------------------------|
|      |       |           |     |     | Detection Type   | Allele Frequency | FAO | FDP  | Gene    | Change       | Location     |           |        |      |                            |
| SNV  | chr18 | 48604754  | G   | T   | TP               | 0.1978           | 395 | 1997 | SMAD4   | p.Glu526Ter  | exonic       |           | 1      | 3    | 20                         |
| SNV  | chr4  | 55593431  | G   | A   | TP               | 0.1970           | 394 | 2000 | KIT     | p.Val530Ile  | exonic       |           | 1      | 1    | 14                         |
| SNV  | chr7  | 55259530  | G   | A   | TP               | 0.2000           | 400 | 2000 | EGFR    | p.Gly863Asp  | exonic       | COSM14070 | 1      | 3    | 8                          |
| SNV  | chr9  | 21971186  | G   | A   | TP               | 0.3157           | 627 | 1986 | CDKN2A  | p.Arg58Ter   | exonic       |           | 1      | 3    | 33                         |
| SNV  | chr10 | 89653865  | A   | G   | TP               | 0.1009           | 89  | 882  | PTEN    | p.Arg55Gly   | exonic       |           | 1      | 2    | 46                         |
| SNV  | chr10 | 89685319  | G   | A   | TP               | 0.2898           | 574 | 1981 | PTEN    |              | intronic     |           | 1      | 3    | 55                         |
| SNV  | chr10 | 89692850  | C   | G   | TP               | 0.2611           | 522 | 1999 | PTEN    | p.Leu112Val  | exonic       | COSM5199  | 1      | 3    | 37                         |
| SNV  | chr11 | 108123551 | C   | T   | TP               | 0.2377           | 475 | 1998 | ATM     | p.Pro604Ser  | exonic       | COSM22499 | 1      | 5    | 36                         |
| SNV  | chr7  | 116423428 | T   | G   | TP               | 0.2360           | 472 | 2000 | MET     | p.Tyr1253Asp | exonic       | COSM700   | 1      | 1    | 21                         |
| SNV  | chr5  | 149433645 | T   | C   | TP               | 0.2701           | 514 | 1903 | CSF1R   | p.Tyr969Cys  | exonic       | COSM947   | 1      | 1    | 47                         |
| SNV  | chr13 | 28592642  | C   | A   | TP               | 0.2603           | 520 | 1998 | FLT3    | p.Asp835Tyr  | exonic       | COSM783   | 1      | 1    | 21                         |
| SNV  | chr18 | 48581243  | C   | T   | TP               | 0.2310           | 462 | 2000 | SMAD4   | p.Gln183Ter  | exonic       |           | 1      | 2    | 53                         |
| SNV  | chr17 | 7577538   | C   | T   | TP               | 0.1436           | 287 | 1999 | TP53    | p.Arg209Gln  | exonic       | COSM10662 | 1      | 2    | 11                         |
| SNV  | chr10 | 89692911  | G   | A   | TP               | 0.2721           | 544 | 1999 | PTEN    | p.Gly132Asp  | exonic       | COSM5123  | 1      | 2    | 9                          |
| SNV  | chr11 | 108180945 | G   | C   | TP               | 0.2366           | 238 | 1006 | ATM     | p.Val1941Leu | exonic       |           | 1      | 1    | 15                         |
| SNV  | chr17 | 7578526   | C   | T   | TP               | 0.0669           | 96  | 1436 | TP53    | p.Cys96Tyr   | exonic       | COSM10801 | 1      | 1    | 37                         |
| SNV  | chr17 | 7576897   | G   | A   | TP               | 0.2720           | 361 | 1327 | TP53    | p.Gln278Ter  | exonic       |           | 1      | 4    | 24                         |
| SNV  | chr4  | 55144547  | C   | T   | TP               | 0.2165           | 433 | 2000 | PDGFRA  | p.Thr674Ile  | exonic       | COSM743   | 1      | 1    | 9                          |
| SNV  | chr17 | 7577022   | G   | A   | TP               | 0.2531           | 506 | 1999 | TP53    | p.Arg267Ter  | exonic       |           | 1      | 1    | 30                         |
| SNV  | chr5  | 112175930 | G   | T   | TP               | 0.3037           | 604 | 1989 | APC     | p.Glu1547Ter | exonic       |           | 1      | 2    | 10                         |
| SNV  | chr11 | 108200958 | A   | C   | TP               | 0.2309           | 284 | 1230 | ATM     | p.Gln2442Pro | exonic       | COSM12951 | 1      | 2    | 35                         |
| SNV  | chr18 | 48591847  | A   | G   | TP               | 0.2164           | 432 | 1996 | SMAD4   | p.Glu337Gly  | exonic       |           | 1      | 3    | 33                         |
| SNV  | chr17 | 7579414   | C   | T   | TP               | 0.2300           | 460 | 2000 | TP53    | p.Trp52Ter   | exonic       |           | 1      | 2    | 27                         |
| SNV  | chr4  | 55152085  | G   | T   | TP               | 0.1989           | 397 | 1996 | PDGFRA  | p.(=)        | exonic       |           | 1      | 2    | 61                         |
| SNV  | chr5  | 112175507 | C   | T   | TP               | 0.2195           | 439 | 2000 | APC     | p.Gln1406Ter | exonic       |           | 1      | 3    | 54                         |
| SNV  | chr11 | 108225590 | A   | T   | TP               | 0.2030           | 217 | 1069 | ATM     | p.Thr2947Ser | exonic       |           | 1      | 2    | 41                         |
| SNV  | chr17 | 7579521   | C   | A   | TP               | 0.2201           | 440 | 1999 | TP53    | p.Glu17Ter   | exonic       |           | 1      | 2    | 26                         |
| SNV  | chr5  | 112175348 | G   | T   | TP               | 0.2961           | 592 | 1999 | APC     | p.Glu1353Ter | exonic       |           | 1      | 3    | 33                         |
| SNV  | chr11 | 108236118 | A   | G   | TP               | 0.2365           | 473 | 2000 | ATM     | p.(=)        | exonic       |           | 1      | 3    | 22                         |
| SNV  | chr16 | 68856093  | C   | T   | TP               | 0.2422           | 483 | 1994 | CDH1    | p.Ala634Val  | exonic       |           | 1      | 1    | 40                         |
| MNV  | chr10 | 43615568  | GC  | TT  | TP               | 0.2593           | 518 | 1998 | RET     | p.Ala883Phe  | exonic       | COSM977   | 2      | 3    | 22                         |
| SNV  | chr4  | 153250883 | G   | A   | TP               | 0.2100           | 420 | 2000 | FBXW7   | p.Arg393Ter  | exonic       |           | 1      | 2    | 31                         |
| SNV  | chr9  | 5073770   | G   | T   | TP               | 0.2720           | 544 | 2000 | JAK2    | p.Val617Phe  | exonic       | COSM12600 | 1      | 3    | 41                         |
| SNV  | chr18 | 48604682  | A   | G   | TP               | 0.1997           | 397 | 1988 | SMAD4   | p.Arg502Gly  | exonic       |           | 1      | 3    | 24                         |
| SNV  | chr17 | 37881440  | C   | T   | TP               | 0.2516           | 503 | 1999 | ERBB2   | p.His878Tyr  | exonic       |           | 1      | 2    | 13                         |
| SNV  | chr19 | 1221293   | C   | T   | TP               | 0.2818           | 563 | 1998 | STK11   | p.(=)        | exonic       |           | 1      | 1    | 27                         |
| SNV  | chr4  | 55593689  | C   | T   | TP               | 0.1890           | 378 | 2000 | KIT     | p.(=)        | exonic       |           | 1      | 3    | 6                          |
| SNV  | chr13 | 49039164  | G   | T   | TP               | 0.2603           | 514 | 1975 | RB1     | p.Glu748Ter  | exonic       |           | 1      | 2    | 15                         |
| SNV  | chr18 | 48591838  | A   | G   | TP               | 0.2100           | 420 | 2000 | SMAD4   | p.Gln334Arg  | exonic       |           | 1      | 3    | 24                         |
| SNV  | chr7  | 140481449 | A   | G   | TP               | 0.2887           | 573 | 1985 | BRAF    | p.(=)        | exonic       |           | 1      | 3    | 58                         |
| SNV  | chr18 | 48593465  | G   | A   | TP               | 0.2004           | 325 | 1622 | SMAD4   | p.Ala406Thr  | exonic       |           | 1      | 1    | 54                         |
| SNV  | chr9  | 133738349 | G   | A   | TP               | 0.2926           | 585 | 1999 | ABL1    | p.Gly269Glu  | exonic       | COSM12577 | 1      | 5    | 29                         |
| SNV  | chr19 | 1220502   | G   | T   | TP               | 0.1276           | 255 | 1999 | STK11   | p.Glu199Ter  | exonic       |           | 1      | 1    | 22                         |
| SNV  | chr22 | 24134006  | C   | T   | TP               | 0.2306           | 461 | 1999 | SMARCB1 | p.Arg53Ter   | exonic       |           | 1      | 1    | 53                         |
| SNV  | chr4  | 1808331   | G   | T   | TP               | 0.1875           | 375 | 2000 | FGFR3   | p.Gly699Cys  | exonic       | COSM24802 | 1      | 2    | 20                         |
| SNV  | chr22 | 24133990  | C   | A   | TP               | 0.2271           | 453 | 1995 | SMARCB1 | p.Tyr47Ter   | exonic       |           | 1      | 4    | 37                         |
| SNV  | chr16 | 68847282  | G   | A   | TP               | 0.2605           | 521 | 2000 | CDH1    | p.Asp402Asn  | exonic       | COSM19750 | 1      | 2    | 20                         |
| SNV  | chr11 | 108172374 | G   | T   | TP               | 0.2392           | 478 | 1998 | ATM     |              | splicesite_5 |           | 1      | 2    | 12                         |
| SNV  | chr17 | 7574003   | G   | A   | TP               | 0.2185           | 437 | 2000 | TP53    | p.Arg303Ter  | exonic       |           | 1      | 2    | 27                         |
| SNV  | chr17 | 37881332  | G   | A   | TP               | 0.2500           | 500 | 2000 | ERBB2   | p.Val842Ile  | exonic       | COSM14065 | 1      | 1    | 48                         |
| SNV  | chr4  | 55144172  | A   | G   | TP               | 0.1968           | 393 | 1997 | PDGFRA  | p.(=)        | exonic       |           | 1      | 3    | 23                         |
| SNV  | chr5  | 112175255 | G   | T   | TP               | 0.2147           | 429 | 1998 | APC     | p.Glu1322Ter | exonic       |           | 1      | 1    | 13                         |

| Type | Chr   | Pos       | Ref | Alt | Observed Variant |                  |     |      | Protein |              |              | Hotspot    | Length | HRUN | Proximity to Amplicon Edge |
|------|-------|-----------|-----|-----|------------------|------------------|-----|------|---------|--------------|--------------|------------|--------|------|----------------------------|
|      |       |           |     |     | Detection Type   | Allele Frequency | FAO | FDP  | Gene    | Change       | Location     |            |        |      |                            |
| SNV  | chr4  | 55144148  | C   | A   | TP               | 0.1925           | 385 | 2000 | PDGFRA  | p.Asn659Lys  | exonic       | COSM22415  | 1      | 4    | 47                         |
| SNV  | chr18 | 48593495  | A   | G   | TP               | 0.2006           | 326 | 1625 | SMAD4   | p.Arg416Gly  | exonic       |            | 1      | 2    | 24                         |
| SNV  | chr13 | 49027168  | C   | T   | TP               | 0.1897           | 259 | 1365 | RB1     | p.Arg579Ter  | exonic       |            | 1      | 2    | 10                         |
| SNV  | chr4  | 55594258  | T   | C   | TP               | 0.2043           | 388 | 1899 | KIT     | p.Val654Ala  | exonic       | COSM12706  | 1      | 1    | 21                         |
| SNV  | chr11 | 534242    | A   | G   | TP               | 0.5775           | 533 | 923  | HRAS    | p.(=)        | exonic       |            | 1      | 4    | 22                         |
| SNV  | chr5  | 112173917 | C   | T   | TP               | 0.2661           | 532 | 1999 | APC     | p.Arg876Ter  | exonic       |            | 1      | 1    | 45                         |
| SNV  | chr10 | 89720744  | G   | T   | TP               | 0.2835           | 430 | 1517 | PTEN    | p.Glu299Ter  | exonic       |            | 1      | 1    | 3                          |
| SNV  | chr10 | 89692993  | G   | T   | TP               | 0.2894           | 578 | 1997 | PTEN    | p.Arg159Ser  | exonic       | COSM5287   | 1      | 2    | 39                         |
| SNV  | chr7  | 116340262 | A   | G   | TP               | 0.2877           | 571 | 1985 | MET     | p.Asn375Ser  | exonic       | COSM710    | 1      | 2    | 49                         |
| SNV  | chr7  | 140453154 | T   | C   | TP               | 0.3017           | 600 | 1989 | BRAF    | p.Asp594Gly  | exonic       | COSM467    | 1      | 2    | 52                         |
| SNV  | chr13 | 48955538  | C   | T   | TP               | 0.1925           | 385 | 2000 | RB1     | p.Arg552Ter  | exonic       |            | 1      | 1    | 13                         |
| SNV  | chr10 | 89692965  | A   | G   | TP               | 0.2811           | 561 | 1996 | PTEN    | p.Glu150Gly  | exonic       | COSM5130   | 1      | 4    | 56                         |
| SNV  | chr18 | 48586262  | C   | T   | TP               | 0.2305           | 461 | 2000 | SMAD4   | p.Gln311Ter  | exonic       |            | 1      | 2    | 11                         |
| SNV  | chr7  | 128850341 | G   | T   | TP               | 0.3029           | 448 | 1479 | SMO     | p.Trp535Leu  | exonic       | COSM13146  | 1      | 3    | 22                         |
| SNV  | chr10 | 89685271  | T   | G   | TP               | 0.2553           | 507 | 1986 | PTEN    | p.Phe56Val   | exonic       |            | 1      | 5    | 13                         |
| SNV  | chr9  | 139399344 | A   | G   | TP               | 0.2294           | 264 | 1151 | NOTCH1  | p.Leu1600Pro | exonic       | COSM12771  | 1      | 2    | 7                          |
| SNV  | chr12 | 25380275  | T   | G   | TP               | 0.6375           | 691 | 1084 | KRAS    | p.Gln61His   | exonic       | COSM554    | 1      | 2    | 15                         |
| SNV  | chr12 | 121431413 | G   | T   | TP               | 0.2290           | 330 | 1441 | HNF1A   | p.Trp206Leu  | exonic       | COSM21471  | 1      | 4    | 42                         |
| SNV  | chr17 | 7579312   | C   | T   | TP               | 0.2375           | 475 | 2000 | TP53    | p.(=)        | exonic       |            | 1      | 2    | 20                         |
| SNV  | chr17 | 7577105   | G   | A   | TP               | 0.2215           | 443 | 2000 | TP53    | p.Pro239Leu  | exonic       | COSM10863  | 1      | 2    | 19                         |
| SNV  | chr7  | 116423449 | G   | T   | TP               | 0.2315           | 463 | 2000 | MET     | p.Gly1260Cys | exonic       |            | 1      | 2    | 42                         |
| SNV  | chr7  | 55259524  | T   | A   | TP               | 0.1982           | 396 | 1998 | EGFR    | p.Leu861Gln  | exonic       | COSM6213   | 1      | 1    | 14                         |
| SNV  | chr11 | 108172385 | C   | T   | TP               | 0.2401           | 480 | 1999 | ATM     | p.Arg1730Ter | exonic       |            | 1      | 3    | 23                         |
| SNV  | chr7  | 116339642 | G   | T   | TP               | 0.2979           | 595 | 1997 | MET     | p.Glu168Asp  | exonic       | COSM706    | 1      | 1    | 27                         |
| SNV  | chr13 | 49037865  | A   | G   | TP               | 0.2805           | 561 | 2000 | RB1     |              | splicesite_5 |            | 1      | 2    | 19                         |
| SNV  | chr9  | 133748391 | T   | C   | TP               | 0.2845           | 569 | 2000 | ABL1    | p.Met370Thr  | exonic       | COSM12578  | 1      | 1    | 26                         |
| SNV  | chr7  | 116423474 | T   | C   | TP               | 0.2303           | 460 | 1997 | MET     | p.Met1268Thr | exonic       | COSM691    | 1      | 1    | 18                         |
| SNV  | chr4  | 55962505  | T   | C   | TP               | 0.1658           | 331 | 1996 | KDR     | p.(=)        | exonic       |            | 1      | 4    | 43                         |
| SNV  | chr17 | 7578550   | G   | A   | TP               | 0.0390           | 78  | 2000 | TP53    | p.Ser88Phe   | exonic       | COSM44226  | 1      | 4    | 13                         |
| SNV  | chr12 | 121432032 | C   | T   | TP               | 0.2008           | 401 | 1997 | HNF1A   | p.Thr260Met  | exonic       | COSM24923  | 1      | 1    | 22                         |
| SNV  | chr7  | 116423456 | A   | G   | TP               | 0.2370           | 474 | 2000 | MET     | p.Lys1262Arg | exonic       |            | 1      | 3    | 36                         |
| SNV  | chr10 | 89690805  | G   | A   | TP               | 0.2992           | 598 | 1999 | PTEN    | p.Cys71Tyr   | exonic       | COSM5102   | 1      | 1    | 23                         |
| SNV  | chr17 | 7578388   | C   | T   | TP               | 0.2452           | 449 | 1831 | TP53    | p.Arg142His  | exonic       | COSM10738  | 1      | 1    | 18                         |
| SNV  | chr4  | 1807889   | A   | G   | TP               | 0.1144           | 111 | 970  | FGFR3   | p.Lys652Glu  | exonic       | COSM719    | 1      | 2    | 41                         |
| SNV  | chr4  | 55141097  | T   | C   | TP               | 0.1484           | 264 | 1779 | PDGFRA  | p.(=)        | exonic       |            | 1      | 3    | 6                          |
| SNV  | chr17 | 7576865   | A   | C   | TP               | 0.2737           | 367 | 1341 | TP53    | p.Tyr288Ter  | exonic       |            | 1      | 3    | 50                         |
| SNV  | chr10 | 43615622  | G   | A   | TP               | 0.2554           | 504 | 1973 | RET     | p.Glu901Lys  | exonic       |            | 1      | 3    | 65                         |
| SNV  | chr4  | 55593632  | C   | T   | TP               | 0.1828           | 348 | 1904 | KIT     | p.(=)        | exonic       |            | 1      | 1    | 57                         |
| SNV  | chr7  | 140453193 | T   | C   | TP               | 0.3043           | 604 | 1985 | BRAF    | p.Asn581Ser  | exonic       | COSM462    | 1      | 2    | 28                         |
| SNV  | chr11 | 108204681 | A   | G   | TP               | 0.3039           | 255 | 839  | ATM     | p.Thr2666Ala | exonic       |            | 1      | 1    | 3                          |
| SNV  | chr5  | 112175162 | C   | T   | TP               | 0.2850           | 570 | 2000 | APC     | p.Gln1291Ter | exonic       |            | 1      | 2    | 19                         |
| SNV  | chr10 | 89690838  | A   | C   | TP               | 0.2987           | 596 | 1995 | PTEN    | p.Asn82Thr   | exonic       |            | 1      | 2    | 39                         |
| SNV  | chr9  | 133738357 | T   | C   | TP               | 0.2890           | 578 | 2000 | ABL1    | p.Tyr272His  | exonic       | COSM12576  | 1      | 1    | 21                         |
| SNV  | chr19 | 1221319   | C   | T   | TP               | 0.2710           | 541 | 1996 | STK11   | p.Pro281Leu  | exonic       | COSM21355  | 1      | 6    | 1                          |
| SNV  | chr13 | 48942685  | C   | T   | TP               | 0.2358           | 390 | 1654 | RB1     | p.Arg358Ter  | exonic       |            | 1      | 1    | 26                         |
| SNV  | chr18 | 48591865  | C   | G   | TP               | 0.2027           | 405 | 1998 | SMAD4   | p.Ser343Ter  | exonic       |            | 1      | 1    | 51                         |
| SNV  | chr7  | 55242452  | C   | T   | TP               | 0.2781           | 556 | 1999 | EGFR    | p.Pro741Leu  | exonic       | COSM17570  | 1      | 3    | 41                         |
| SNV  | chr10 | 89692980  | A   | G   | TP               | 0.2746           | 549 | 1999 | PTEN    | p.Tyr155Cys  | exonic       | COSM5144   | 1      | 1    | 52                         |
| SNV  | chr4  | 55594221  | A   | G   | TP               | 0.2036           | 388 | 1906 | KIT     | p.Lys642Glu  | exonic       | COSM1304   | 1      | 3    | 51                         |
| SNV  | chr7  | 128846398 | C   | T   | TP               | 0.2807           | 432 | 1539 | SMO     | p.Leu412Phe  | exonic       | COSM216037 | 1      | 2    | 21                         |
| SNV  | chr10 | 43609102  | T   | C   | TP               | 0.2940           | 588 | 2000 | RET     | p.Cys620Arg  | exonic       | COSM29804  | 1      | 2    | 36                         |
| SNV  | chr20 | 57484596  | A   | T   | TP               | 0.2233           | 445 | 1993 | GNAS    | p.Gln870Leu  | exonic       | COSM27888  | 1      | 1    | 34                         |

| Type  | Chr   | Pos       | Ref                                    | Alt                        | Detection Type | Observed Variant |     |      | Gene    | Protein Change                             | Location | Hotspot   | Length | HRUN | Proximity to Amplicon Edge |
|-------|-------|-----------|----------------------------------------|----------------------------|----------------|------------------|-----|------|---------|--------------------------------------------|----------|-----------|--------|------|----------------------------|
|       |       |           |                                        |                            |                | Allele Frequency | FAO | FDP  |         |                                            |          |           |        |      |                            |
| SNV   | chr13 | 48941628  | A                                      | T                          | TP             | 0.2152           | 430 | 1998 | RB1     |                                            | splice_5 |           | 1      | 2    | 27                         |
| SNV   | chr16 | 68856105  | G                                      | A                          | TP             | 0.2429           | 485 | 1997 | CDH1    | p.Trp638Ter                                | exonic   |           | 1      | 2    | 28                         |
| SNV   | chr13 | 48941672  | A                                      | G                          | TP             | 0.2401           | 480 | 1999 | RB1     | p.Asn328Asp                                | exonic   |           | 1      | 5    | 52                         |
| SNV   | chr10 | 89692830  | G                                      | T                          | TP             | 0.2541           | 507 | 1995 | PTEN    | p.Cys105Phe                                | exonic   | COSM5266  | 1      | 6    | 17                         |
| SNV   | chr13 | 49033916  | C                                      | T                          | FN             | 0.0000           |     |      |         |                                            |          |           | 1      | 2    | 18                         |
| INDEL | chr19 | 1207076   | TG                                     | T                          | TP             | 0.1657           | 329 | 1986 | STK11   | p.Glu57fs                                  | exonic   |           | 1      | 5    | 10                         |
| INDEL | chr5  | 170837543 | C                                      | CTCTG                      | TP             | 0.2625           | 436 | 1661 | NPM1    | p.Trp288fs                                 | exonic   |           | 4      | 1    | 42                         |
| INDEL | chr4  | 55953816  | ACTTCCTCCTCTCC<br>ATACAGGAAAC          | A<br>CCCCGAGGTGCTGGT       | TP             | 0.1667           | 0   | 0    | KDR     | p.Val1199fs                                | exonic   |           | 25     | 2    | 19                         |
| INDEL | chr22 | 24145528  | C                                      | CCCCAT                     | TP             | 0.1047           | 208 | 1987 | SMARCB1 | p.Leu191fs                                 | exonic   |           | 19     | 3    | 7                          |
| INDEL | chr5  | 112175479 | TGA                                    | T                          | TP             | 0.2173           | 432 | 1988 | APC     | p.Arg1399fs                                | exonic   |           | 2      | 1    | 26                         |
| INDEL | chr22 | 24176353  | GC                                     | G                          | TP             | 0.1665           | 261 | 1568 | SMARCB1 | p.Pro383fs                                 | exonic   |           | 1      | 4    | 37                         |
| INDEL | chr10 | 89711972  | AGAT                                   | A                          | TP             | 0.2758           | 547 | 1983 | PTEN    | p.Met206del<br>p.Glu770_Ala771insAlaTyrVal | exonic   | COSM4978  | 3      | 3    | 46                         |
| INDEL | chr17 | 37880981  | A                                      | AGCATACGTGATG              | TP             | 0.1910           | 380 | 1990 | ERBB2   | Met                                        | exonic   | COSM682   | 12     | 1    | 28                         |
| INDEL | chr10 | 89690818  | TTA                                    | T                          | TP             | 0.2996           | 598 | 1996 | PTEN    | p.Tyr76fs                                  | exonic   |           | 2      | 2    | 36                         |
| INDEL | chr5  | 149453057 | C                                      | CACTGCTTGA                 | TP             | 0.1839           | 268 | 1457 | CSF1R   |                                            | splice_5 |           | 9      | 1    | 7                          |
| INDEL | chr4  | 55592178  | C                                      | CTGCCTA                    | TP             | 0.1842           | 367 | 1992 | KIT     | p.Ser501_Ala502insAlaTyr                   | exonic   | COSM1326  | 6      | 1    | 21                         |
| INDEL | chr5  | 112175830 | GC                                     | G                          | TP             | 0.2837           | 564 | 1988 | APC     | p.Pro1514fs                                | exonic   |           | 1      | 2    | 27                         |
| INDEL | chr10 | 89725056  | TTC                                    | T                          | TP             | 0.2786           | 543 | 1949 | PTEN    | p.Phe347fs                                 | exonic   |           | 2      | 2    | 33                         |
| INDEL | chr5  | 112175211 | T                                      | TA                         | TP             | 0.2822           | 563 | 1995 | APC     | p.Glu1309fs                                | exonic   |           | 1      | 5    | 56                         |
| INDEL | chr5  | 112175675 | AAG                                    | A                          | TP             | 0.2710           | 535 | 1974 | APC     | p.Ser1465fs                                | exonic   |           | 2      | 4    | 40                         |
| INDEL | chr17 | 7579715   | AG                                     | A                          | TP             | 0.2463           | 468 | 1900 | TP53    |                                            | utr_5    |           | 1      | 2    | 18                         |
| INDEL | chr7  | 55242464  | AGGAATTAAGAGA<br>AGC                   | A                          | TP             | 0.2846           | 563 | 1978 | EGFR    | p.Glu754_Ala758del                         | exonic   | COSM6223  | 15     | 4    | 53                         |
| INDEL | chr5  | 112175951 | G                                      | GA                         | TP             | 0.2094           | 417 | 1991 | APC     | p.Thr1556fs                                | exonic   |           | 1      | 7    | 31                         |
| INDEL | chr18 | 48593475  | T                                      | TAC                        | TP             | 0.1993           | 323 | 1621 | SMAD4   | p.Gln410fs                                 | exonic   |           | 2      | 1    | 42                         |
| INDEL | chr5  | 112174989 | CA                                     | C                          | TP             | 0.2973           | 594 | 1998 | APC     | p.Ser1234fs                                | exonic   |           | 1      | 2    | 40                         |
| INDEL | chr9  | 133747571 | T                                      | TGCC                       | TP             | 0.2885           | 575 | 1993 | ABL1    | p.Ile312delinsMetPro                       | exonic   |           | 3      | 1    | 43                         |
| INDEL | chr18 | 48584602  | ACT                                    | A                          | TP             | 0.2241           | 446 | 1990 | SMAD4   | p.Thr259fs                                 | exonic   |           | 2      | 1    | 51                         |
| INDEL | chr13 | 28608255  | G                                      | GATCATATTCATATT<br>CTCTGAA | TP             | 0.1280           | 254 | 1984 | FLT3    | p.Asp600_Leu601insPheArgGluTyrGluTyrAsp    | exonic   | COSM19953 | 21     | 1    | 28                         |
| INDEL | chr10 | 43609942  | GAGCTGTGCCGCA                          | AGCT                       | TP             | 0.2112           | 407 | 1927 | RET     | p.Glu632_Thr636delinsSerSer                | exonic   | COSM1048  | 12     | 1    | 56                         |
| INDEL | chr10 | 89720798  | GACT                                   | G                          | TP             | 0.2484           | 491 | 1977 | PTEN    | p.Thr319fs                                 | exonic   |           | 4      | 3    | 14                         |
| INDEL | chr5  | 112176063 | C                                      | CA                         | FN             | 0.0000           | N/A | N/A  | N/A     | N/A                                        | N/A      | N/A       | 1      | 7    | 0                          |
| INDEL | chr17 | 7572962   | GT                                     | G                          | FN             | 0.0000           | N/A | N/A  | N/A     | N/A                                        | N/A      | N/A       | 1      | 6    | 32                         |
| INDEL | chr13 | 49033890  | TAGAACATATCATC                         | T                          | FN             | 0.0000           | N/A | N/A  | N/A     | N/A                                        | N/A      | N/A       | 13     | 3    | 31                         |
| INDEL | chr9  | 139390804 | CG<br>GGTGTGATTACAGT<br>CAAAAGGCCTCTAC | C                          | FN             | 0.0000           | N/A | N/A  | N/A     | N/A                                        | N/A      | N/A       | 1      | 4    | 40                         |
| INDEL | chr16 | 68835650  | GGT                                    | G                          | FN             | 0.0000           | N/A | N/A  | N/A     | N/A                                        | N/A      | N/A       | 30     | 2    | 17                         |
| INDEL | chr10 | 89717769  | TA                                     | T                          | FN             | 0.0000           | N/A | N/A  | N/A     | N/A                                        | N/A      | N/A       | 1      | 6    | 10                         |

| Type  | Chr  | Pos       | Ref                             | Alt | Detection Type | Observed Variant |     |     | Gene | Protein Change | Location | Hotspot | Length | HRUN | Proximity to Amplicon Edge |
|-------|------|-----------|---------------------------------|-----|----------------|------------------|-----|-----|------|----------------|----------|---------|--------|------|----------------------------|
|       |      |           |                                 |     |                | Allele Frequency | FAO | FDP |      |                |          |         |        |      |                            |
| INDEL | chr5 | 112173830 | G                               | GA  | FN             | 0.0000           | N/A | N/A | N/A  | N/A            | N/A      | N/A     | 1      | 6    | 38                         |
|       |      |           | CTATAAGAAAGAG<br>ATAACAGCGCATAT |     |                |                  |     |     |      |                |          |         |        |      |                            |
| INDEL | chr4 | 55972978  | TATGATTTAATTTTT                 | C   | FN             | 0.0000           | N/A | N/A | N/A  | N/A            | N/A      | N/A     | 41     | 2    | 26                         |

Read support for all OCP-targeted single nucleotide variants (SNV), short insertions/deletions (INDEL), and multi-nucleotide variants (MNV) known to be present in the Acrometrix Oncology Hotspot Control. All variants have an expected variant frequency of 0.20. Variant type, chromosome, position, reference allele, and variant allele are provided. Detection type is indicated (TP: true positive; FN: false negative). Observed variant frequency is reported (FAO/FDP); observed variant frequency is '0.0000' if variant not detected. Read level information (FAO = flow corrected variant allele containing reads; FDP=flow corrected read depth flow) for each detected variant is provided. Gene, protein change, and location (exonic, intronic, splice\_3, splice\_5, utr\_5) for each variant is provided. COSMIC v68 IDs are provided where applicable. Variant length, maximum forward or reverse strand homopolymer context (HRUN), and distance from amplicon end are provided for each variant.



**Table S8: Evaluation of the OncoPrint Cancer Research Panel (OCP) using the QMRS multimixed FFPE cell line**

| Chr   | Pos         | Locus    | Gene   | Amino Acid   | Nucleotide Change         | Expected Allelic Frequency | UM FAO (OCPv0.9b) | UM FDP (OCPv0.9b) | UM Variant Allele Frequency (FAO/FDP) (OCPv0.9b) |     | ThermoFisher Variant Allele Frequency (FAO/FDP) (OCPv0.9b) |       | UM FAO (OCPv0.9a) | UM FDP (OCPv0.9a) | UM Variant Allele Frequency (FAO/FDP) (OCPv0.9a) |     | Detected      | Callset    | Induced/Endogenous |
|-------|-------------|----------|--------|--------------|---------------------------|----------------------------|-------------------|-------------------|--------------------------------------------------|-----|------------------------------------------------------------|-------|-------------------|-------------------|--------------------------------------------------|-----|---------------|------------|--------------------|
|       |             |          |        |              |                           |                            |                   |                   | FAO                                              | FDP | FAO                                                        | FDP   |                   |                   | FAO                                              | FDP |               |            |                    |
| chr5  | 112,179,431 | 5q21-q22 | APC    | R2714C       | C>T                       | 0.330                      | 639               | 1825              | 0.350                                            | 537 | 1684                                                       | 0.319 | 702               | 1997              | 0.352                                            | Yes | Default       | Endogenous |                    |
| chr13 | 32,913,559  | 13q12.3  | BRCA2  | A1689fs      | delA                      | 0.330                      | 535               | 1995              | 0.268                                            | 274 | 1912                                                       | 0.143 | 8                 | 29                | 0.276                                            | Yes | Pre-Specified | Endogenous |                    |
| chr9  | 139,409,754 | 9q34.3   | NOTCH1 | P668S        | G>A                       | 0.315                      | 596               | 1999              | 0.298                                            | 604 | 1995                                                       | 0.303 | 682               | 1996              | 0.347                                            | Yes | Default       | Endogenous |                    |
| chr7  | 55,241,707  | 7p12     | EGFR   | G719S        | G>A                       | 0.245                      | 407               | 1638              | 0.249                                            | 441 | 1520                                                       | 0.290 | 51                | 187               | 0.273                                            | Yes | Default       | Induced    |                    |
| chr3  | 178,952,085 | 3q26.3   | PI3KCA | H1047R       | A>G                       | 0.175                      | 334               | 1999              | 0.167                                            | 312 | 2000                                                       | 0.156 | 355               | 1998              | 0.178                                            | Yes | Default       | Induced    |                    |
| chr12 | 25,398,281  | 12p12.1  | KRAS   | G13D         | C>T                       | 0.150                      | 260               | 1866              | 0.139                                            | 299 | 1991                                                       | 0.150 | 298               | 1993              | 0.150                                            | Yes | Default       | Induced    |                    |
| chr1  | 115,256,530 | 1p13.2   | NRAS   | Q61K         | G>T                       | 0.125                      | 176               | 1995              | 0.088                                            | 186 | 1997                                                       | 0.093 | 56                | 654               | 0.086                                            | Yes | Default       | Induced    |                    |
| chr7  | 140,453,136 | 7q34     | BRAF   | V600E        | A>T                       | 0.105                      | 193               | 1673              | 0.115                                            | 209 | 1993                                                       | 0.108 | 211               | 1999              | 0.106                                            | Yes | Default       | Induced    |                    |
| chr4  | 55,599,321  | 4q11-q12 | KIT    | D816V        | A>T                       | 0.100                      | 189               | 1998              | 0.095                                            | 203 | 1993                                                       | 0.102 | 188               | 1994              | 0.094                                            | Yes | Default       | Induced    |                    |
| chr3  | 178,936,091 | 3q26.3   | PI3KCA | E545K        | G>A                       | 0.090                      | 163               | 1995              | 0.082                                            | 177 | 1993                                                       | 0.089 | 157               | 1999              | 0.079                                            | Yes | Default       | Induced    |                    |
| chr22 | 30,060,991  | 22q12.2  | NF2    | P275fs       | c.823delC                 | 0.080                      | 82                | 1182              | 0.069                                            | 83  | 1359                                                       | 0.061 | 137               | 1766              | 0.078                                            | Yes | Pre-Specified | Endogenous |                    |
| chr17 | 29,552,144  | 17q11.2  | NF1    | L626fs*      | delT                      | 0.075                      | 203               | 2256              | 0.090                                            | 401 | 2341                                                       | 0.171 | 21                | 144               | 0.146                                            | No  | Pre-Specified | Endogenous |                    |
| chr12 | 25,398,284  | 12p12.1  | KRAS   | G12D         | CC>TC                     | 0.060                      | 90                | 1864              | 0.048                                            | 105 | 1995                                                       | 0.053 | 102               | 1999              | 0.051                                            | Yes | Default       | Induced    |                    |
| chr7  | 55,259,515  | 7p12     | EGFR   | L858R        | c.2573T>G                 | 0.030                      | 43                | 1999              | 0.022                                            | 34  | 1995                                                       | 0.017 | 18                | 520               | 0.035                                            | Yes | Pre-Specified | Induced    |                    |
| chr7  | 55,242,464  | 7p12     | EGFR   | ΔE746 - A750 | AGGAATTAAGAG AAGCAAC>AAAC | 0.020                      | 21                | 1977              | 0.011                                            | 29  | 1979                                                       | 0.015 | 0                 | 1959              | 0.000                                            | Yes | Pre-Specified | Induced    |                    |
| chr7  | 55,249,071  | 7p12     | EGFR   | T790M        | c.2369C>T                 | 0.010                      | 18                | 1490              | 0.012                                            | 17  | 1441                                                       | 0.012 | 5                 | 262               | 0.019                                            | Yes | Pre-Specified | Induced    |                    |

Detection of induced and endogenous variants present in the Horizon Diagnostics FFPE QMRS cell line by the OncoPrint Cancer Research Panel (OCP). For each variant chromosomal position, band/locus, gene, amino acid & nucleotide change information are given. Expected variant allelic frequency as reported by Horizon Diagnostics is provided. Read level information (FAO = flow corrected variant allele containing reads; FDP=flow corrected read depth flow) and observed variant allele frequency (FAO/FDP) for each variant is provided from three separate sequencing runs (two using OCP v0.9b at different sites from the same library, one using OCP v0.9a). FAO, FDP, and FAO/FDP values in red represent values based on manual review of overlapping reads as variant was not detected using automated variant calling. Variant detection status in OCP v0.9b, calling parameters, and whether the variant was induced or is endogenous to the QMRS multimixed cell line is reported.

Table S9: OCP identified point mutations and insertions/deletions across MO/LU/PR cohorts

| Sample | Pair | Gene   | Location        | Ref | Alt | AA Change    | FAO  | FDP  | Variant Fraction | Variant Type      | Transcript ID (RefSeq) | Nucleotide Change  | ESP      | 1000G  | db135       | FSAF       | FSAR | HRUN | Onncome Variant Class | Onncome Gene Class |    |
|--------|------|--------|-----------------|-----|-----|--------------|------|------|------------------|-------------------|------------------------|--------------------|----------|--------|-------------|------------|------|------|-----------------------|--------------------|----|
| MO-1   |      | ATM    | chr11:108129749 | C   | T   | p.Arg805Ter  | 604  | 1998 | 0.30             | nonsense          | NM_000051              | c.C2413T           | NA       | NA     | NA          | 283        | 321  | 1    | Deleterious           | LoF                |    |
| MO-1   |      | BRAF   | chr7:140453136  | A   | T   | p.Val600Glu  | 459  | 1479 | 0.31             | missense          | NM_004333              | c.T1799A           | NA       | NA     | rs113488022 | 250        | 209  | 1    | Hotspot               | GoF                |    |
| MO-1   |      | CDKN2A | chr9:21971206   | AC  | A   | p.Val51fs    | 585  | 1759 | 0.33             | fsDel             | NM_000077              | c.151delG          | NA       | NA     | NA          | 273        | 312  | 2    | Deleterious           | LoF                |    |
| MO-1   |      | STK11  | chr19:1220590   | C   | T   | p.Pro203Leu  | 654  | 2000 | 0.33             | missense          | NM_000455              | c.C608T            | NA       | NA     | NA          | 336        | 318  | 3    | NA                    | NA                 |    |
| MO-1   |      | TP53   | chr17:7578457   | C   | T   | p.Arg158His  | 674  | 1995 | 0.34             | missense          | NM_000546              | c.G473A            | NA       | NA     | NA          | 323        | 351  | 1    | Hotspot               | LoF                |    |
| MO-1   |      | TSC2   | chr16:2130319   | C   | T   | p.Ala1184Val | 411  | 1299 | 0.32             | missense          | NM_000548              | c.C3551T           | NA       | NA     | NA          | 174        | 237  | 1    | NA                    | NA                 |    |
| MO-2   |      | ARAF   | chrX:47426091   | A   | C   | p.Asn204Thr  | 13   | 246  | 0.05             | missense          | NM_001654              | c.A611C            | NA       | NA     | NA          | 0          | 13   | 2    | NA                    | NA                 |    |
| MO-2   |      | BRC2   | chr13:32907129  | T   | C   | p.I505T      | 1011 | 1986 | 0.51             | missense          | NM_000059              | c.T1514C           | 0.000769 | 0.0009 | rs28997708  | 547        | 464  | 1    | NA                    | NA                 |    |
| MO-2   |      | KRAS   | chr12:25398284  | C   | A   | p.Gly12Val   | 194  | 1987 | 0.10             | missense          | NM_004985              | c.G35T             | NA       | NA     | rs121913529 | 96         | 98   | 2    | Hotspot               | GoF                |    |
| MO-3   |      | ATP11B | chr3:182616435  | C   | A   | p.Gln1065Lys | 641  | 1999 | 0.32             | missense          | NM_014616              | c.C3193A           | NA       | NA     | NA          | 256        | 385  | 1    | NA                    | NA                 |    |
| MO-3   |      | DNMT3A | chr2:25467508   | T   | C   | p.Glu523Gly  | 15   | 289  | 0.05             | missense          | NM_022552              | c.A1568G           | NA       | NA     | NA          | 1          | 14   | 1    | NA                    | NA                 |    |
| MO-3   |      | NOTCH1 | chr9:139413921  | C   | C   | p.Asn280Ser  | 500  | 654  | 0.76             | missense          | NM_017617              | c.A839G            | 0.000082 | NA     | NA          | 210        | 290  | 2    | NA                    | NA                 |    |
| MO-3   |      | NRAS   | chr1:115256530  | G   | T   | p.Gln61Lys   | 669  | 1996 | 0.34             | missense          | NM_002524              | c.C181A            | NA       | NA     | rs121913254 | 309        | 360  | 1    | Hotspot               | GoF                |    |
| MO-3   |      | TET2   | chr4:106196321  | C   | T   | p.Pro1552Ser | 1024 | 1998 | 0.51             | missense          | NM_001127208           | c.C4654T           | NA       | NA     | NA          | 474        | 550  | 3    | NA                    | NA                 |    |
| MO-3   |      | TP53   | chr17:7578212   | GA  | G   | p.Arg213fs   | 483  | 1517 | 0.32             | fsDel             | NM_000546              | c.636delT          | NA       | NA     | NA          | 212        | 271  | 4    | Deleterious           | LoF                |    |
| MO-4   |      | DDR2   | chr1:162729617  | A   | A   | p.Gly235Ser  | 484  | 1839 | 0.26             | missense          | NM_006182              | c.G703A            | NA       | NA     | NA          | 264        | 220  | 2    | NA                    | NA                 |    |
| MO-4   |      | MAP2K1 | chr15:66729163  | C   | T   | p.Pro124Leu  | 1057 | 1999 | 0.53             | missense          | NM_002755              | c.C371T            | NA       | NA     | NA          | 563        | 494  | 2    | Hotspot               | GoF                |    |
| MO-4   |      | MAP2K1 | chr15:66729147  | CA  | AG  | p.His119Ser  | 1070 | 1989 | 0.54             | missense;nonfsSub | NM_002755              | c.355_356AG        | NA       | NA     | NA          | 575        | 485  | 1    | NA                    | NA                 |    |
| MO-4   |      | TET2   | chr4:106156463  | C   | T   | p.Pro455Leu  | 361  | 1997 | 0.18             | missense          | NM_017628              | c.C1364T           | NA       | NA     | NA          | 205        | 156  | 2    | NA                    | NA                 |    |
| MO-5   |      | ATM    | chr11:108216545 | C   | T   | p.Arg2832Cys | 644  | 1730 | 0.37             | missense          | NM_000051              | c.C8494T           | NA       | NA     | NA          | 267        | 377  | 2    | Hotspot               | LoF                |    |
| MO-5   |      | ERBB4  | chr2:212566827  | C   | T   | p.Glu452Lys  | 761  | 1998 | 0.38             | missense          | NM_005235              | c.G1354A           | NA       | NA     | NA          | 373        | 387  | 2    | Hotspot               | GoF                |    |
| MO-5   |      | EZH2   | chr7:148508728  | A   | A   | p.Tyr646Asn  | 594  | 1997 | 0.30             | missense          | NM_004456              | c.T1936A           | NA       | NA     | NA          | 284        | 311  | 1    | Hotspot               | GoF                |    |
| MO-5   |      | KRAS   | chr12:253980274 | C   | T   | p.Glu62Lys   | 16   | 123  | 0.13             | missense          | NM_004985              | c.G184A            | NA       | NA     | NA          | 9          | 7    | 1    | NA                    | NA                 |    |
| MO-5   |      | NF1    | chr17:29653163  | C   | T   | p.His1721Tyr | 787  | 1996 | 0.39             | missense          | NM_000267              | c.C5098T           | NA       | NA     | NA          | 434        | 353  | 1    | NA                    | NA                 |    |
| MO-5   |      | PIK3R1 | chr5:67576368   | A   | A   | p.Ser216Tyr  | 688  | 1812 | 0.38             | missense          | NM_181523              | c.C647A            | NA       | NA     | NA          | 219        | 469  | 2    | NA                    | NA                 |    |
| MO-5   |      | RB1    | chr13:49027128  | G   | C   | NA           | 1529 | 2000 | 0.7645           | splice            | NM_000321              | exon18:c.1696-1G>A | NA       | NA     | NA          | 777        | 752  | 2    | NA                    | NA                 |    |
| MO-5   |      | TET2   | chr4:106196399  | C   | T   | p.Pro1578Ser | 935  | 1342 | 0.70             | missense          | NM_001127208           | c.C4732T           | NA       | NA     | NA          | 374        | 561  | 2    | NA                    | NA                 |    |
| MO-5   |      | TSC1   | chr9:135777074  | CC  | TT  | p.Asp802Asn  | 506  | 1339 | 0.38             | nonfsSub          | NM_000368              | c.2403_2404AA      | NA       | NA     | NA          | 258        | 248  | 2    | NA                    | NA                 |    |
| MO-6   |      | APC    | chr5:112177949  | A   | G   | p.Asn2220Asp | 594  | 951  | 0.62             | missense          | NM_000038              | c.A6658G           | 0.000077 | NA     | NA          | NA         | 283  | 311  | 3                     | NA                 | NA |
| MO-6   |      | ESR1   | chr6:152419977  | G   | A   | p.Arg55His   | 695  | 2000 | 0.35             | missense          | NM_000125              | c.G1664A           | NA       | NA     | NA          | 355        | 340  | 1    | Hotspot               | GoF                |    |
| MO-6   |      | IFTM1  | chr1:1314208    | CA  | AC  | p.Pro13His   | 222  | 1916 | 0.12             | missense;nonfsSub | NM_003641              | c.38_39AC          | NA       | NA     | NA          | 154        | 68   | 2    | NA                    | NA                 |    |
| MO-6   |      | KRAS   | chr12:25398284  | C   | A   | p.Gly12Val   | 431  | 1453 | 0.30             | missense          | NM_004985              | c.G35T             | NA       | NA     | rs121913529 | 207        | 224  | 2    | Hotspot               | GoF                |    |
| MO-6   |      | NOTCH1 | chr9:139411792  | C   | T   | p.Ser496Asn  | 10   | 87   | 0.11             | missense          | NM_017617              | c.G1487A           | NA       | NA     | NA          | 3          | 7    | 1    | NA                    | NA                 |    |
| MO-6   |      | PIK3CA | chr3:178936095  | A   | C   | p.Gln546Pro  | 669  | 1983 | 0.34             | missense          | NM_006218              | c.A1637C           | NA       | NA     | NA          | 337        | 332  | 1    | Hotspot               | GoF                |    |
| MO-7   |      | APC    | chr5:112177160  | G   | GA  | p.Asn1958fs  | 176  | 1777 | 0.10             | fsIns             | NA                     | NA                 | NA       | NA     | NA          | NA         | NA   | NA   | Deleterious           | LoF                |    |
| MO-7   |      | APC    | chr5:112154755  | G   | A   | p.Asp342Glu  | 1122 | 1997 | 0.56             | missense          | NM_000038              | c.C1026A           | NA       | NA     | NA          | 481        | 641  | 1    | NA                    | NA                 |    |
| MO-7   |      | BRAF   | chr7:140453136  | A   | T   | p.Val600Glu  | 259  | 1999 | 0.13             | missense          | NM_004333              | c.T1799A           | NA       | NA     | rs113488022 | 121        | 138  | 1    | Hotspot               | GoF                |    |
| MO-7   |      | CDKN2A | chr9:21970981   | A   | T   | p.Val126Asp  | 27   | 197  | 0.14             | missense          | NM_000077              | c.T377A            | NA       | NA     | rs104894098 | 15         | 12   | 1    | NA                    | NA                 |    |
| MO-7   |      | CDKN2A | chr9:21974685   | GC  | G   | p.Arg47fs    | 99   | 523  | 0.19             | fsDel             | NM_000077              | c.141delG          | NA       | NA     | NA          | 52         | 47   | 2    | Deleterious           | LoF                |    |
| MO-7   |      | TP53   | chr17:7579392   | G   | GT  | p.Thr102fs   | 35   | 521  | 0.07             | fsIns             | NA                     | NA                 | NA       | NA     | NA          | NA         | NA   | NA   | Deleterious           | LoF                |    |
| MO-7   |      | TSC2   | chr16:2126149   | A   | AT  | p.Val909fs   | 26   | 153  | 0.17             | fsIns             | NA                     | NA                 | NA       | NA     | NA          | NA         | NA   | NA   | Deleterious           | LoF                |    |
| MO-8   |      | BRAF   | chr7:140453136  | A   | T   | p.Val600Glu  | 783  | 1284 | 0.61             | missense          | NM_004333              | c.T1799A           | NA       | NA     | rs113488022 | 374        | 409  | 1    | Hotspot               | GoF                |    |
| MO-8   |      | BRC2   | chr13:32930673  | C   | T   | p.Thr2515Ile | 627  | 1277 | 0.49             | missense          | NM_000059              | c.C7544T           | 0.000461 | NA     | NA          | rs28997744 | 353  | 274  | 1                     | NA                 | NA |
| MO-8   |      | ERBB4  | chr2:212530163  | C   | T   | p.Gly586Ser  | 618  | 2000 | 0.31             | missense          | NM_005235              | c.G1756A           | NA       | NA     | NA          | 287        | 331  | 2    | NA                    | NA                 |    |
| MO-8   |      | FGFR3  | chr4:1806131    | T   | C   | p.Phe384Leu  | 526  | 774  | 0.68             | missense          | NM_000142              | c.T1150C           | 0.003614 | 0.0018 | rs17881656  | 277        | 249  | 2    | NA                    | NA                 |    |
| MO-8   |      | FGFR4  | chr5:176517766  | G   | A   | p.Asp126Asn  | 288  | 807  | 0.36             | missense          | NM_002011              | c.G376A            | 0.000077 | NA     | NA          | NA         | 184  | 104  | 1                     | NA                 | NA |
| MO-9   |      | APC    | chr5:112178439  | G   | GT  | p.Leu2384fs  | 209  | 1973 | 0.11             | fsIns             | NM_000038              | c.7149dupT         | NA       | NA     | NA          | 142        | 67   | 3    | Deleterious           | LoF                |    |
| MO-9   |      | ATM    | chr11:108173716 | C   | CA  | p.Cys1821fs  | 296  | 1924 | 0.15             | fsIns             | NM_000051              | c.5457dupA         | NA       | NA     | NA          | 57         | 239  | 4    | Deleterious           | LoF                |    |
| MO-9   |      | BRC2   | chr13:32907333  | C   | CT  | p.Leu574fs   | 138  | 1254 | 0.11             | fsIns             | NM_000059              | c.1719dupT         | NA       | NA     | NA          | 105        | 33   | 4    | Deleterious           | LoF                |    |
| MO-9   |      | BRC2   | chr13:32906547  | GT  | GT  | p.Ser313fs   | 134  | 1189 | 0.11             | fsIns             | NM_000059              | c.933dupT          | NA       | NA     | NA          | 74         | 60   | 5    | Deleterious           | LoF                |    |
| MO-9   |      | BRC2   | chr13:32915084  | G   | GA  | p.Thr2199fs  | 461  | 1996 | 0.23             | fsIns             | NM_000059              | c.6593dupA         | NA       | NA     | NA          | 82         | 379  | 3    | Deleterious           | LoF                |    |
| MO-9   |      | CDH1   | chr16:68849552  | C   | CT  | p.Val487fs   | 372  | 1992 | 0.19             | fsIns             | NM_004360              | c.1456dupT         | NA       | NA     | NA          | 244        | 128  | 3    | Deleterious           | LoF                |    |
| MO-9   |      | CDKN2A | chr9:21971016   | GG  | AA  | p.Pro114Leu  | 390  | 811  | 0.48             | missense;nonfsSub | NM_000077              | c.341_342TT        | NA       | NA     | NA          | 212        | 178  | 3    | Hotspot               | LoF                |    |
| MO-9   |      | ERBB2  | chr17:37880239  | C   | CA  | p.Ala763fs   | 193  | 1985 | 0.10             | fsIns             | NM_004448              | c.2284dupA         | NA       | NA     | NA          | 27         | 166  | 3    | NA                    | NA                 |    |
| MO-9   |      | MYCL   | chr1:40363630   | A   | AT  | p.Ile200fs   | 299  | 1980 | 0.15             | fsIns             | NM_001033081           | c.508dupA          | NA       | NA     | NA          | 238        | 61   | 3    | NA                    | NA                 |    |
| MO-9   |      | NF1    | chr17:29592260  | GA  | GAA | p.Glu1582fs  | 202  | 984  | 0.21             | fsIns             | NA                     | NA                 | NA       | NA     | NA          | NA         | NA   | NA   | Deleterious           | LoF                |    |
| MO-9   |      | NRAS   | chr1:115256530  | G   | T   | p.Gln61Lys   | 875  | 1995 | 0.44             | missense          | NM_002524              | c.C181A            | NA       | NA     | rs121913254 | 478        | 397  | 1    | Hotspot               | GoF                |    |
| MO-9   |      | RB1    | chr13:48934190  | A   | AT  | p.Gln217fs   | 267  | 1672 | 0.16             | fsIns             | NM_000321              | c.646dupT          | NA       | NA     | NA          | 211        | 56   | 3    | Deleterious           | LoF                |    |
| MO-9   |      | SMAD4  | chr18:48591825  | G   | GA  | p.Met331fs   | 54   | 1987 | 0.03             | fsIns             | NA                     | NA                 | NA       | NA     | NA          | NA         | NA   | NA   | Deleterious           | LoF                |    |
| MO-9   |      | TP53   | chr17:7578212   | G   | A   | p.Arg213Ter  | 848  | 1909 | 0.44             | nonsense          | NM_000546              | c.C637T            | NA       | NA     | NA          | 332        | 516  | 1    | Deleterious           | LoF                |    |
| MO-9   |      | TSC1   | chr9:135772865  | C   | CT  | p.Asp920fs   | 396  | 1994 | 0.20             | fsIns             | NM_000368              | c.2757dupA         | NA       | NA     | NA          | 319        | 77   | 3    | Deleterious           | LoF                |    |
| MO-10  |      | CTNNB1 | chr3:41266137   | C   | A   | p.Ser        |      |      |                  |                   |                        |                    |          |        |             |            |      |      |                       |                    |    |

| Sample | Pair | Gene   | Location        | Ref     | Alt     | AA Change    | FAO  | FDP  | Variant Fraction | Variant Type      | Transcript ID (RefSeq) | Nucleotide Change | ESP      | 1000G  | db135       | FSAF | FSAR | HRUN | Onncomine Variant Class | Onncomine Gene Class |
|--------|------|--------|-----------------|---------|---------|--------------|------|------|------------------|-------------------|------------------------|-------------------|----------|--------|-------------|------|------|------|-------------------------|----------------------|
| MO-14  |      | PIK3CA | chr3:178921548  | G       | A       | p.Val344Met  | 466  | 2000 | 0.23             | missense          | NM_006218              | c.G1030A          | NA       | NA     | NA          | 226  | 240  | 1    | Hotspot                 | GoF                  |
| MO-15  |      | PTCH1  | chr9:98247997   | G       | A       | p.Ala185Val  | 515  | 1062 | 0.48             | missense          | NM_000264              | c.C554T           | NA       | NA     | NA          | 227  | 288  | 2    | NA                      | NA                   |
| MO-16  |      | APC    | chr5:112175755  | AT      | A       | p.Leu1489fs  | 540  | 1993 | 0.27             | fsDel             | NM_000038              | c.4465delT        | NA       | NA     | NA          | 333  | 207  | 2    | Deleterious             | LoF                  |
| MO-16  |      | CDH1   | chr16:68867211  | A       | G       | p.Thr820Ala  | 827  | 1999 | 0.41             | missense          | NM_004360              | c.A2458G          | NA       | NA     | NA          | 408  | 419  | 1    | NA                      | NA                   |
| MO-16  |      | CTNNB1 | chr3:41268740   | TATA    | T       | p.Ile327del  | 258  | 1988 | 0.13             | nonfsDel          | NM_001904              | c.979_981del      | NA       | NA     | NA          | 107  | 151  | 1    | NA                      | NA                   |
| MO-16  |      | TP53   | chr17:7578393   | A       | T       | p.His179Gln  | 178  | 366  | 0.49             | missense          | NM_000546              | c.T537A           | NA       | NA     | NA          | 110  | 68   | 1    | Hotspot                 | LoF                  |
| MO-17  |      | FGFR4  | chr5:176520374  | C       | T       | p.P367S      | 306  | 1320 | 0.23             | missense          | NM_022863              | c.C1099T          | NA       | NA     | NA          | 162  | 144  | 2    | NA                      | NA                   |
| MO-17  |      | NOTCH1 | chr9:139403332  | G       | A       | p.Pro1054Leu | 341  | 1227 | 0.28             | missense          | NM_017617              | c.C3161T          | NA       | NA     | NA          | 163  | 178  | 4    | NA                      | NA                   |
| MO-17  |      | NOTCH1 | chr9:1394031390 | G       | A       | p.Pro1227Ser | 127  | 431  | 0.29             | missense          | NM_017617              | c.C3679T          | NA       | NA     | NA          | 56   | 71   | 6    | NA                      | NA                   |
| MO-17  |      | PIK3R1 | chr5:67522771   | C       | T       | p.Arg90Trp   | 904  | 1997 | 0.45             | missense          | NM_181523              | c.C268T           | 0.000077 | NA     | rs141974044 | 511  | 393  | 4    | NA                      | NA                   |
| MO-17  |      | TP53   | chr17:7578457   | C       | A       | p.Arg158Leu  | 605  | 1465 | 0.44             | missense          | NM_000546              | c.G473T           | NA       | NA     | NA          | 319  | 286  | 1    | Hotspot                 | LoF                  |
| MO-18  |      | BRAF   | chr7:140453136  | AC      | TT      | NA           | 1632 | 1994 | 0.82             | nonfsSub          | NM_004333              | c.1798_1799AA     | NA       | NA     | NA          | 738  | 894  | 1    | Hotspot                 | GoF                  |
| MO-18  |      | BRC1A  | chr17:41245027  | G       | A       | p.Arg841Trp  | 962  | 1921 | 0.50             | missense          | NM_007294              | c.C2521T          | 0.002384 | 0.0014 | rs1800709   | 514  | 448  | 1    | NA                      | NA                   |
| MO-18  |      | BRC2A  | chr13:32945213  | C       | T       | p.Gln2870Ter | 135  | 475  | 0.28             | nonsense          | NM_000059              | c.C8608T          | NA       | NA     | NA          | 59   | 76   | 1    | Deleterious             | LoF                  |
| MO-18  |      | BRC2A  | chr13:32914815  | G       | C       | p.Arg2108Pro | 521  | 1665 | 0.33             | missense          | NM_000059              | c.G6323C          | NA       | NA     | NA          | 289  | 232  | 1    | NA                      | NA                   |
| MO-18  |      | BRC2A  | chr13:32944624  | C       | T       | p.Ser2806Leu | 736  | 1998 | 0.37             | missense          | NM_000059              | c.C8417T          | NA       | NA     | NA          | 304  | 432  | 1    | NA                      | NA                   |
| MO-18  |      | CDKN2A | chr9:21970981   | A       | T       | p.Val126Asp  | 120  | 216  | 0.56             | missense          | NM_000077              | c.T377A           | NA       | NA     | rs104894098 | 69   | 51   | 1    | NA                      | NA                   |
| MO-18  |      | PIK3R1 | chr5:67576473   | C       | T       | p.Ser251Phe  | 1019 | 1998 | 0.51             | missense          | NM_181523              | c.C752T           | NA       | NA     | NA          | 523  | 496  | 1    | NA                      | NA                   |
| MO-18  |      | PTCH1  | chr9:98238318   | G       | A       | p.Gln576Ter  | 1206 | 2000 | 0.60             | nonsense          | NM_000264              | c.C1726T          | NA       | NA     | NA          | 612  | 594  | 2    | Deleterious             | LoF                  |
| MO-18  |      | RAC1   | chr7:6426892    | C       | T       | p.Pro29Ser   | 695  | 1337 | 0.52             | missense          | NM_006908              | c.C85T            | NA       | NA     | NA          | 356  | 339  | 2    | Hotspot                 | GoF                  |
| MO-19  |      | BRAF   | chr7:140453136  | A       | T       | p.Val600Glu  | 1060 | 1997 | 0.53             | missense          | NM_004333              | c.T1799A          | NA       | NA     | rs113488022 | 524  | 539  | 1    | Hotspot                 | GoF                  |
| MO-19  |      | CDKN2A | chr9:21971199   | C       | T       | p.Met53Ile   | 819  | 1068 | 0.77             | missense          | NM_000077              | c.G159A           | NA       | NA     | rs104894095 | 409  | 410  | 1    | NA                      | NA                   |
| MO-19  |      | NRAS   | chr1:115256530  | G       | T       | p.Gln61Lys   | 388  | 1405 | 0.28             | missense          | NM_002524              | c.C181A           | NA       | NA     | rs121913254 | 158  | 230  | 1    | Hotspot                 | GoF                  |
| MO-20  |      | BRC1A  | chr17:41251887  | C       | A       | p.Ser151Ile  | 841  | 1997 | 0.42             | missense          | NM_007294              | c.G452T           | NA       | NA     | NA          | 444  | 397  | 1    | NA                      | NA                   |
| MO-20  |      | NF1    | chr17:29559113  | G       | T       | p.Glu1074Ter | 468  | 1926 | 0.24             | nonsense          | NM_000267              | c.G3220T          | NA       | NA     | NA          | 216  | 252  | 2    | Deleterious             | LoF                  |
| MO-20  |      | PTCH1  | chr9:98238332   | C       | G       | p.Arg571Pro  | 594  | 1994 | 0.30             | missense          | NM_000264              | c.G1712C          | NA       | NA     | NA          | 297  | 297  | 3    | NA                      | NA                   |
| MO-20  |      | TP53   | chr17:7577532   | G       | A       | p.Pro250Leu  | 1051 | 1425 | 0.74             | missense          | NM_000546              | c.C749T           | NA       | NA     | NA          | 495  | 556  | 3    | Hotspot                 | LoF                  |
| MO-20  |      | WT1    | chr11:32414225  | T       | G       | p.Gln442His  | 912  | 2000 | 0.46             | missense          | NM_000378              | c.A1275C          | NA       | NA     | NA          | 490  | 422  | 3    | NA                      | NA                   |
| MO-21  |      | APC    | chr5:112175507  | C       | T       | p.Gln1406Ter | 234  | 1571 | 0.15             | nonsense          | NM_000038              | c.C4216T          | NA       | NA     | NA          | 115  | 119  | 1    | Deleterious             | LoF                  |
| MO-21  |      | ERBB2  | chr17:37871547  | C       | A       | p.Ala386Asp  | 765  | 1471 | 0.52             | missense          | NM_004448              | c.C1157A          | 0.004229 | 0.0018 | rs141116145 | 409  | 356  | 2    | NA                      | NA                   |
| MO-21  |      | KRAS   | chr12:25398284  | C       | A       | p.Gly12Val   | 247  | 1970 | 0.13             | missense          | NM_004985              | c.G35T            | NA       | NA     | rs121913529 | 136  | 111  | 2    | Hotspot                 | GoF                  |
| MO-21  |      | MDM2   | chr12:69233403  | A       | G       | p.Glu423Gly  | 972  | 1995 | 0.49             | missense          | NM_002392              | c.A1268G          | NA       | NA     | NA          | 470  | 502  | 2    | NA                      | NA                   |
| MO-21  |      | TP53   | chr17:7578457   | C       | A       | p.Arg158His  | 335  | 1656 | 0.20             | missense          | NM_000546              | c.G473A           | NA       | NA     | NA          | 156  | 179  | 1    | Hotspot                 | LoF                  |
| MO-22  |      | TP53   | chr17:7577120   | C       | G       | p.Arg273His  | 511  | 1369 | 0.37             | missense          | NM_000546              | c.G818A           | NA       | 0.0005 | rs28934576  | 271  | 240  | 1    | Hotspot                 | LoF                  |
| MO-23  |      | APEX1  | chr14:20925431  | G       | A       | p.Gly241Arg  | 767  | 1429 | 0.54             | missense          | NM_001641              | c.G721A           | 0.004613 | 0.0046 | rs33956927  | 341  | 426  | 4    | NA                      | NA                   |
| MO-23  |      | BRC1A  | chr17:41246602  | T       | T       | p.S316G      | 1005 | 1997 | 0.50             | missense          | NM_007294              | c.A946G           | 0.000154 | NA     | rs55874646  | 516  | 489  | 1    | NA                      | NA                   |
| MO-23  |      | CTNNB1 | chr3:41266136   | C       | C       | p.Ser45Pro   | 785  | 1794 | 0.44             | missense          | NM_001904              | c.T133C           | NA       | NA     | rs121913407 | 312  | 473  | 2    | Hotspot                 | GoF                  |
| MO-23  |      | KRAS   | chr12:25398281  | C       | G       | p.Gly13Asp   | 427  | 1892 | 0.23             | missense          | NM_004985              | c.G38A            | NA       | NA     | rs112445441 | 213  | 214  | 2    | Hotspot                 | GoF                  |
| MO-23  |      | MSH2   | chr2:47630444   | C       | C       | p.Asp38Glu   | 265  | 533  | 0.50             | missense          | NM_002524              | c.C114G           | NA       | NA     | NA          | 140  | 125  | 2    | NA                      | NA                   |
| MO-23  |      | NOTCH1 | chr9:139390902  | C       | G       | p.Gly243Ala  | 147  | 318  | 0.46             | missense          | NM_017617              | c.G7289C          | 0.001337 | 0.0023 | rs36049318  | 107  | 40   | 3    | NA                      | NA                   |
| MO-23  |      | NOTCH1 | chr9:139404341  | C       | T       | p.Arg38Gln   | 536  | 1077 | 0.50             | missense          | NM_017617              | c.G2813A          | 0.001694 | 0.0027 | rs35962301  | 288  | 248  | 4    | NA                      | NA                   |
| MO-24  |      | APC    | chr5:112174551  | T       | TC      | p.Lys1088fs  | 522  | 1988 | 0.26             | fsIns             | NM_000038              | c.3261dupC        | NA       | NA     | NA          | 267  | 255  | 1    | Deleterious             | LoF                  |
| MO-24  |      | APC    | chr5:112175608  | TC      | T       | p.Pro1440fs  | 563  | 1985 | 0.28             | fsDel             | NM_000038              | c.4318delC        | NA       | NA     | NA          | 313  | 250  | 2    | Deleterious             | LoF                  |
| MO-24  |      | BRC1A  | chr17:412426488 | A       | T       | p.Ser1533Ile | 1060 | 1994 | 0.53             | missense          | NM_007294              | c.G4555T          | 0.002768 | 0.0005 | rs1800744   | 551  | 509  | 1    | NA                      | NA                   |
| MO-24  |      | IL6    | chr7:22768404   | CTTCCAA | CTCCATC | NA           | 106  | 1362 | 0.08             | nonfsSub          | NM_000600              | c.303_309CTCCATC  | NA       | NA     | NA          | 106  | 0    | 2    | NA                      | NA                   |
| MO-24  |      | IL6    | chr7:22768404   | CTTCCAA | CTCCAA  | NA           | 1256 | 1362 | 0.92             | fsSub             | NM_000600              | c.303_309CTCCAA   | NA       | NA     | NA          | 599  | 657  | 2    | NA                      | NA                   |
| MO-24  |      | KDR    | chr4:55956221   | G       | A       | p.Arg1032Ter | 272  | 1998 | 0.14             | nonsense          | NM_002253              | c.C3094T          | NA       | NA     | NA          | 139  | 133  | 1    | NA                      | NA                   |
| MO-24  |      | KRAS   | chr12:25398281  | C       | T       | p.Gly13Asp   | 623  | 1868 | 0.33             | missense          | NM_004985              | c.G38A            | NA       | NA     | rs112445441 | 332  | 291  | 2    | Hotspot                 | GoF                  |
| MO-24  |      | TP53   | chr17:7578175   | A       | G       | NA           | 521  | 1280 | 0.407            | splice            | NM_000546              | exon7:c.672+2T>C  | NA       | NA     | NA          | 317  | 204  | 1    | NA                      | NA                   |
| MO-25  |      | MYO18A | chr17:27425920  | GG      | AA      | p.Pro1235Phe | 333  | 1355 | 0.25             | missense;nonfsSub | NM_078471              | c.3703_3704TT     | NA       | NA     | NA          | 175  | 158  | 2    | NA                      | NA                   |
| MO-25  |      | NF1    | chr17:29560179  | G       | A       | p.Gly1219Glu | 594  | 1747 | 0.34             | missense          | NM_000267              | c.G3656A          | NA       | NA     | NA          | 304  | 290  | 2    | NA                      | NA                   |
| MO-25  |      | NOTCH1 | chr9:139391769  | CC      | TT      | p.Ser2141Leu | 27   | 92   | 0.29             | missense          | NM_017617              | c.C6422T          | NA       | NA     | NA          | 15   | 12   | 1    | NA                      | NA                   |
| MO-25  |      | RB1    | chr13:49050851  | CC      | TT      | p.Gln846Ter  | 569  | 1731 | 0.33             | nonfsSub          | NM_003621              | c.2535_2536TT     | NA       | NA     | NA          | 279  | 290  | 2    | Deleterious             | LoF                  |
| MO-25  |      | TP53   | chr17:7578211   | C       | A       | p.Arg213Leu  | 382  | 787  | 0.49             | missense          | NM_000546              | c.G538T           | NA       | NA     | NA          | 113  | 69   | 1    | Hotspot                 | LoF                  |
| MO-26  |      | CD274  | chr9:5457282    | C       | T       | p.Arg96Trp   | 175  | 1573 | 0.11             | missense          | NM_014143              | c.C256T           | 0.000077 | NA     | NA          | 93   | 63   | 3    | NA                      | NA                   |
| MO-26  |      | CDKN2A | chr9:21971164   | T       | G       | p.S73R       | 662  | 1358 | 0.49             | missense          | NM_058195              | c.A217C           | 0.002047 | NA     | NA          | 329  | 333  | 1    | NA                      | NA                   |
| MO-26  |      | FBXW7  | chr4:153249305  | G       | A       | p.Arg465Cys  | 457  | 1997 | 0.23             | missense          | NM_018315              | c.C1153T          | NA       | NA     | NA          | 230  | 227  | 1    | Hotspot                 | LoF                  |
| MO-26  |      | KRAS   | chr12:25398284  | C       | T       | p.Gly12Asp   | 928  | 1986 | 0.47             | missense          | NM_004985              | c.G35A            | NA       | NA     | rs121913529 | 406  | 222  | 2    | Hotspot                 | GoF                  |
| MO-26  |      | PTEEN  | chr10:89717637  | A       | C       | p.Lys221Thr  | 444  | 1998 | 0.22             | missense          | NM_000314              | c.A662C           | NA       | NA     | NA          | 221  | 223  | 3    | NA                      | NA                   |
| MO-26  |      | PTEEN  | chr10:89720768  | G       | T       | p.Glu307Ter  | 175  | 306  | 0.57             | nonsense          | NM_000314              | c.G919T           | NA       | NA     | NA          | 101  | 74   | 1    | NA                      | NA                   |
| MO-27  |      | BRAF   | chr7:140453136  | A       | T       | p.Val600Glu  | 971  | 1710 | 0.57             | missense          | NM_0                   |                   |          |        |             |      |      |      |                         |                      |

| Sample | Pair | Gene    | Location        | Ref      | Alt    | AA Change      | FAO  | FDP  | Variant Fraction | Variant Type      | Transcript ID (RefSeq) | Nucleotide Change | ESP      | 1000G  | db135       | FSAF | FSAR | HRUN | Onncomine Variant Class | Onncomine Gene Class |
|--------|------|---------|-----------------|----------|--------|----------------|------|------|------------------|-------------------|------------------------|-------------------|----------|--------|-------------|------|------|------|-------------------------|----------------------|
| MO-33  |      | IFITM1  | chr1:1314208    | CA       | AC     | p.Pro13His     | 148  | 1258 | 0.12             | missense/nonfsSub | NM_003641              | c.38_39CA         | NA       | NA     | NA          | NA   | NA   | 2    | NA                      | NA                   |
| MO-33  |      | KRAS    | chr12:25398284  | C        | T      | p.Gly12Asp     | 700  | 1459 | 0.48             | missense          | NM_004985              | c.G35A            | NA       | NA     | rs121913529 | 94   | 374  | 2    | Hotspot                 | GoF                  |
| MO-33  |      | TET2    | chr4:106155620  | C        | A      | p.Pro174His    | 691  | 1495 | 0.46             | missense          | NM_017628              | c.C521A           | 0.001076 | 0.0009 | rs146031219 | 361  | 330  | 2    | NA                      | NA                   |
| MO-33  |      | TP53    | chr17:7577548   | C        | A      | p.Gly245Cys    | 600  | 1350 | 0.44             | missense          | NM_000546              | c.G733T           | NA       | NA     | rs28934575  | 270  | 330  | 2    | Hotspot                 | LoF                  |
| MO-34  |      | ARAF    | chrX:47426091   | A        | C      | p.Asn204Thr    | 10   | 166  | 0.06             | missense          | NM_001654              | c.A611C           | NA       | NA     | NA          | 0    | 10   | 2    | NA                      | NA                   |
| MO-34  |      | BRAF    | chr7:140453136  | A        | T      | p.Val600Glu    | 430  | 1629 | 0.26             | missense          | NM_004333              | c.T1799A          | NA       | NA     | rs113488022 | 220  | 210  | 1    | Hotspot                 | GoF                  |
| MO-34  |      | GATA3   | chr10:8106073   | G        | A      | p.Arg299Gln    | 533  | 1999 | 0.27             | missense          | NM_020205              | c.G893A           | NA       | NA     | NA          | 309  | 244  | 2    | NA                      | NA                   |
| MO-34  |      | MCL1    | chr1:150551576  | A        | G      | p.Leu144Pro    | 755  | 1613 | 0.47             | missense          | NM_021980              | c.T431C           | 0.000924 | 0.0005 | rs149932083 | 272  | 283  | 1    | NA                      | NA                   |
| MO-34  |      | NF1     | chr17:29654840  | C        | T      | p.Cys2216Arg   | 540  | 1989 | 0.27             | missense          | NM_000267              | c.T693C           | NA       | NA     | NA          | 258  | 282  | 1    | NA                      | NA                   |
| MO-34  |      | RPS6KB1 | chr17:58022783  | C        | A      | p.Ala145Asp    | 333  | 1083 | 0.31             | missense          | NM_003161              | c.C1244A          | NA       | NA     | NA          | 158  | 175  | 1    | NA                      | NA                   |
| MO-34  |      | SMAD4   | chr18:48575121  | CA       | C      | p.Asn107fs     | 539  | 1977 | 0.27             | fsDel             | NM_005359              | c.316delA         | NA       | NA     | NA          | 291  | 248  | 5    | Deleterious             | LoF                  |
| MO-34  |      | TSC1    | chr9:135797246  | C        | T      | p.Ser208Asn    | 545  | 1964 | 0.28             | missense          | NM_000368              | c.G623A           | NA       | NA     | NA          | 272  | 273  | 1    | NA                      | NA                   |
| MO-35  |      | APC     | chr5:112157667  | A        | G      | p.Arg463Gly    | 238  | 762  | 0.31             | missense          | NM_000308              | c.A1387G          | NA       | NA     | NA          | 127  | 111  | 1    | NA                      | NA                   |
| MO-35  |      | APC     | chr5:112177477  | A        | C      | p.Lys2062Asn   | 501  | 1597 | 0.31             | missense          | NM_000038              | c.A6186C          | NA       | NA     | NA          | 239  | 262  | 5    | NA                      | NA                   |
| MO-35  |      | ATM     | chr11:108170527 | A        | G      | p.Lys1698Glu   | 537  | 1871 | 0.29             | missense          | NM_000051              | c.A5092G          | NA       | NA     | NA          | 283  | 254  | 2    | NA                      | NA                   |
| MO-35  |      | ATM     | chr11:108218033 | G        | T      | p.Arg2871Ile   | 615  | 1969 | 0.31             | missense          | NM_000051              | c.G8612T          | NA       | NA     | NA          | 297  | 318  | 1    | NA                      | NA                   |
| MO-35  |      | BRC2    | chr13:32906528  | G        | A      | p.Glu305Lys    | 182  | 666  | 0.27             | missense          | NM_000059              | c.G913A           | NA       | NA     | rs80359169  | 87   | 95   | 1    | NA                      | NA                   |
| MO-35  |      | FBXW7   | chr4:153244215  | GT       | G      | p.Lys647fs     | 527  | 1994 | 0.26             | fsDel             | NM_018315              | c.1701delA        | NA       | NA     | NA          | 212  | 315  | 4    | Deleterious             | LoF                  |
| MO-35  |      | GATA2   | chr3:128202710  | C        | T      | p.Arg337Gln    | 268  | 938  | 0.29             | missense          | NM_032638              | c.G1010A          | NA       | NA     | NA          | 176  | 92   | 4    | NA                      | NA                   |
| MO-35  |      | MYO18A  | chr17:27424848  | G        | A      | p.Arg1354Trp   | 705  | 1481 | 0.48             | missense          | NM_078471              | c.C4060T          | 0.001423 | NA     | NA          | 405  | 300  | 2    | NA                      | NA                   |
| MO-35  |      | NF2     | chr22:30069277  | C        | T      | p.Ala381Val    | 403  | 1183 | 0.34             | missense          | NM_000268              | c.C1142T          | NA       | NA     | NA          | 206  | 197  | 1    | NA                      | NA                   |
| MO-35  |      | NOTCH1  | chr9:139412368  | G        | A      | p.Ala426Val    | 323  | 1200 | 0.27             | missense          | NM_017617              | c.C1277T          | NA       | NA     | NA          | 206  | 117  | 1    | NA                      | NA                   |
| MO-35  |      | PTCH1   | chr9:98270455   | C        | A      | p.Glu63Asp     | 121  | 640  | 0.19             | missense          | NM_000264              | c.G189T           | NA       | NA     | NA          | 49   | 72   | 1    | NA                      | NA                   |
| MO-35  |      | TET2    | chr4:106164750  | C        | C      | p.Glu1206Asp   | 331  | 971  | 0.34             | missense          | NM_001127208           | c.A3618C          | NA       | NA     | NA          | 157  | 174  | 2    | NA                      | NA                   |
| MO-36  |      | BRC1A   | chr17:41243509  | T        | T      | p.Arg1347Gly   | 1022 | 1998 | 0.51             | missense          | NM_007294              | c.A4039G          | 0.004844 | 0.0009 | rs28897689  | 546  | 476  | 3    | NA                      | NA                   |
| MO-36  |      | FLT3    | chr13:28623538  | G        | A      | p.Ala340Val    | 75   | 1381 | 0.05             | missense          | NM_004119              | c.C1019T          | NA       | NA     | NA          | 59   | 16   | 1    | NA                      | NA                   |
| MO-37  |      | ATM     | chr11:108158324 | A        | C      | p.1332_1332del | 40   | 105  | 0.38             | nonfsDel          | NM_000051              | c.3994_3996del    | NA       | NA     | NA          | 18   | 22   | 1    | NA                      | NA                   |
| MO-37  |      | BRAF    | chr7:140453136  | A        | T      | p.Val600Glu    | 1183 | 1797 | 0.66             | missense          | NM_004333              | c.T1799A          | NA       | NA     | rs113488022 | 604  | 579  | 1    | Hotspot                 | GoF                  |
| MO-37  |      | NF1     | chr17:29496957  | T        | A      | p.Asp176Glu    | 657  | 1240 | 0.53             | missense          | NM_000267              | c.T528A           | 0.00346  | 0.0018 | rs112306990 | 327  | 330  | 1    | NA                      | NA                   |
| MO-37  |      | NOTCH1  | chr9:139400180  | G        | T      | p.Pro1390Thr   | 552  | 1013 | 0.54             | missense          | NM_017617              | c.C1468A          | NA       | 0.0005 | rs191645600 | 291  | 261  | 4    | NA                      | NA                   |
| MO-38  |      | APC     | chr5:112137039  | G        | T      | p.Gly265Ter    | 701  | 1999 | 0.35             | nonsense          | NM_000308              | c.G793T           | NA       | NA     | NA          | 345  | 356  | 2    | Deleterious             | LoF                  |
| MO-38  |      | BAP1    | chr3:52437740   | G        | A      | p.Pro474Leu    | 419  | 1181 | 0.35             | missense          | NM_004656              | c.C1421T          | NA       | NA     | NA          | 200  | 219  | 2    | NA                      | NA                   |
| MO-38  |      | BRAF    | chr7:140453136  | A        | T      | p.Val600Glu    | 663  | 1595 | 0.42             | missense          | NM_004333              | c.T1799A          | NA       | NA     | rs113488022 | 359  | 304  | 1    | Hotspot                 | GoF                  |
| MO-38  |      | DCUN1D1 | chr3:182683507  | C        | T      | p.Arg13His     | 115  | 473  | 0.24             | missense          | NM_020640              | c.G38A            | NA       | NA     | NA          | 59   | 56   | 1    | NA                      | NA                   |
| MO-38  |      | FBXW7   | chr4:153244184  | C        | T      | p.Arg658Gln    | 647  | 1907 | 0.34             | missense          | NM_018315              | c.G1733A          | NA       | NA     | NA          | 188  | 459  | 1    | NA                      | NA                   |
| MO-38  |      | PTCH1   | chr9:98209457   | C        | T      | p.Val1361Met   | 265  | 730  | 0.36             | missense          | NM_000264              | c.G4081A          | NA       | NA     | NA          | 149  | 116  | 1    | NA                      | NA                   |
| MO-38  |      | TSC1    | chr9:135787731  | C        | C      | p.Arg284His    | 529  | 1542 | 0.34             | missense          | NM_000368              | c.G851A           | 0.000231 | NA     | rs151309813 | 274  | 255  | 1    | NA                      | NA                   |
| MO-38  |      | TSC1    | chr9:135779052  | G        | A      | p.His732Tyr    | 353  | 755  | 0.47             | missense          | NM_000368              | c.C2194T          | 0.002691 | 0.0023 | NA          | 195  | 158  | 1    | NA                      | NA                   |
| MO-39  |      | APC     | chr5:112175862  | TA       | A      | p.Met1525fs    | 516  | 1342 | 0.38             | fsDel             | NM_000308              | c.4572delA        | NA       | NA     | NA          | 236  | 280  | 2    | Deleterious             | LoF                  |
| MO-39  |      | NF2     | chr22:30032794  | C        | T      | p.Arg57Ter     | 1164 | 1943 | 0.60             | nonsense          | NM_000268              | c.C169T           | NA       | NA     | rs121434259 | 633  | 531  | 2    | Deleterious             | LoF                  |
| MO-39  |      | PTPN11  | chr12:112926270 | C        | T      | p.Trh468Met    | 210  | 751  | 0.28             | missense          | NM_002834              | c.C1403T          | NA       | NA     | rs121918457 | 100  | 110  | 1    | Hotspot                 | GoF                  |
| MO-39  |      | TP53    | chr17:7574003   | G        | T      | p.Arg342Ter    | 571  | 949  | 0.60             | nonsense          | NM_000546              | c.C1024T          | NA       | NA     | NA          | 322  | 339  | 2    | Deleterious             | LoF                  |
| MO-40  |      | BRAF    | chr7:140453138  | T        | TGTA   | p.Trh599dup    | 1638 | 1942 | 0.84             | nonfsIns          | NM_004333              | c.1796_1797insTAC | NA       | NA     | NA          | 827  | 811  | 1    | Hotspot                 | GoF                  |
| MO-40  |      | MAP2K1  | chr15:66729162  | C        | T      | p.Pro124Ser    | 673  | 1835 | 0.37             | missense          | NM_002755              | c.C370T           | NA       | NA     | NA          | 389  | 284  | 2    | Hotspot                 | GoF                  |
| MO-40  |      | NF1     | chr17:29496957  | C        | T      | p.Asp176Glu    | 893  | 1748 | 0.51             | missense          | NM_000267              | c.T528A           | 0.00346  | 0.0018 | rs112306990 | 475  | 418  | 1    | Hotspot                 | GoF                  |
| MO-40  |      | WT1     | chr11:32452082  | C        | T      | p.E2K          | 561  | 1415 | 0.40             | missense          | NM_001198551           | c.G4A             | NA       | NA     | NA          | 264  | 297  | 2    | NA                      | NA                   |
| MO-41  |      | STK11   | chr19:1207030   | CGCAAGCG | C      | p.Lys41fs      | 1028 | 1983 | 0.52             | fsDel             | NM_000455              | c.119_125del      | NA       | NA     | NA          | 509  | 519  | 1    | Deleterious             | LoF                  |
| MO-42  |      | APC     | chr5:112164626  | GA       | A      | p.Ser568fs     | 1336 | 1398 | 0.96             | fsDel             | NM_000308              | c.1701delA        | NA       | NA     | NA          | 481  | 855  | 2    | Deleterious             | LoF                  |
| MO-42  |      | CCNE1   | chr19:30312629  | G        | AAG    | p.Glu204Lys    | 159  | 1946 | 0.08             | missense/nonfsSub | NM_001238              | c.610_612AAG      | NA       | NA     | NA          | 102  | 57   | 2    | NA                      | NA                   |
| MO-42  |      | FGFR3   | chr4:1806125    | G        | A      | p.Gly382Ser    | 269  | 587  | 0.46             | missense          | NM_000142              | c.G1144A          | NA       | NA     | NA          | 138  | 131  | 3    | NA                      | NA                   |
| MO-42  |      | NF1     | chr17:29496999  | A        | T      | p.Leu190Phe    | 164  | 540  | 0.30             | missense          | NM_000267              | c.A570T           | NA       | NA     | NA          | 23   | 141  | 4    | NA                      | NA                   |
| MO-42  |      | NF1     | chr17:29653002  | CTGGCT   | CTGGCT | p.F1648fs      | 1721 | 1955 | 0.88             | fsDel             | NM_000267              | c.4942delT        | NA       | NA     | NA          | 664  | 1057 | 3    | NA                      | NA                   |
| MO-42  |      | NF1     | chr17:29553486  | AT       | G      | p.Cys680fs     | 1637 | 1719 | 0.95             | fsDel             | NM_000267              | c.2036delT        | NA       | NA     | NA          | 804  | 833  | 3    | Deleterious             | LoF                  |
| MO-42  |      | NRAS    | chr1:115256529  | T        | C      | p.Gln61Arg     | 372  | 1998 | 0.19             | missense          | NM_002524              | c.A182G           | NA       | NA     | rs11554290  | 188  | 184  | 2    | Hotspot                 | GoF                  |
| MO-42  |      | TSC1    | chr9:135777055  | G        | T      | p.Ala808Val    | 847  | 1462 | 0.58             | missense          | NM_000368              | c.C2423T          | NA       | NA     | NA          | 351  | 496  | 1    | NA                      | NA                   |
| MO-43  |      | NRAS    | chr1:115256530  | G        | T      | p.Gln61Lys     | 1229 | 1989 | 0.62             | missense          | NM_002524              | c.C181A           | NA       | NA     | rs121913254 | 678  | 551  | 1    | Hotspot                 | GoF                  |
| MO-43  |      | PIK3R1  | chr5:67589618   | C        | T      | p.Arg461Ter    | 348  | 932  | 0.37             | nonsense          | NM_181504              | c.C571T           | NA       | NA     | NA          | 193  | 155  | 1    | Deleterious             | LoF                  |
| MO-43  |      | PTEN    | chr10:89717739  | C        | C      | p.Val255Ala    | 737  | 936  | 0.79             | missense          | NM_000314              | c.T764C           | NA       | NA     | NA          | 368  | 369  | 1    | NA                      | NA                   |
| MO-43  |      | WT1     | chr11:32453527  | T        | T      | p.Gly475Ser    | 717  | 1609 | 0.45             | missense          | NM_000378              | c.G1372A          | NA       | NA     | NA          | 320  | 397  | 2    | NA                      | NA                   |
| MO-43  |      | WT1     | chr11:32456789  | C        | T      | p.Asp35Asn     | 283  | 621  | 0.46             | missense          | NM_000378              | c.G103A           | NA       | NA     | NA          | 168  | 115  | 3    | NA                      | NA                   |
| MO-44  |      | ATM     | chr11:108206576 | A        | A      | p.Arg2719His   | 642  | 1911 | 0.34             | missense          | NM_000051              | c.G8156A          | 0.0000   |        |             |      |      |      |                         |                      |

| Sample | Pair | Gene    | Location        | Ref              | Alt     | AA Change      | FAO  | FDP  | Variant Fraction | Variant Type | Transcript ID (RefSeq) | Nucleotide Change  | ESP      | 1000G  | db135       | FSAF | FSAR | HRUN | Onncomine Variant Class | Onncomine Gene Class |
|--------|------|---------|-----------------|------------------|---------|----------------|------|------|------------------|--------------|------------------------|--------------------|----------|--------|-------------|------|------|------|-------------------------|----------------------|
| MO-48  |      | KRAS    | chr12:25398284  | C                | G       | p.Gly12Ala     | 1168 | 1965 | 0.59             | missense     | NM_004985              | c.G35C             | NA       | NA     | rs121913529 | 596  | 572  | 2    | Hotspot                 | GoF                  |
| MO-48  |      | TP53    | chr17:7578466   | G                | A       | p.Thr155Ile    | 998  | 2000 | 0.50             | missense     | NM_000546              | c.C464T            | NA       | NA     | NA          | 557  | 441  | 3    | Hotspot                 | LoF                  |
| MO-48  |      | TP53    | chr17:7578419   | CC               | AA      | NA             | 453  | 879  | 0.52             | nonfsSub     | NM_000546              | c.C510_511TT       | NA       | NA     | NA          | 276  | 177  | 2    | NA                      | NA                   |
| MO-49  |      | ERBB2   | chr17:37880981  | C                | A       | AGCATACGCTGATG | 1192 | 1977 | 0.60             | nonfsIns     | NM_004448              | c.C2019_C2020TTTGG | NA       | NA     | NA          | 703  | 489  | 1    | Hotspot                 | GoF                  |
| MO-49  |      | TP53    | chr17:7579405   | TGACACAGG        | TG      | p.Leu93Ile     | 688  | 1411 | 0.49             | fsDel        | NA                     | NA                 | NA       | NA     | NA          | NA   | NA   | NA   | Deleterious             | LoF                  |
| MO-50  |      | APC     | chr5:112175370  | C                | A       | p.Ser1360Tyr   | 1595 | 1996 | 0.80             | missense     | NM_000038              | c.C4079A           | NA       | NA     | NA          | 921  | 674  | 1    | NA                      | NA                   |
| MO-50  |      | APC     | chr5:112175366  | C                | T       | p.Lys1359Ter   | 1596 | 1995 | 0.80             | nonsense     | NM_000038              | c.A4075T           | NA       | NA     | NA          | 920  | 676  | 3    | Deleterious             | LoF                  |
| MO-50  |      | IL6     | chr7:22768404   | CTTCCAA          | CTCCATC | NA             | 89   | 1384 | 0.06             | nonfsSub     | NM_000591              | c.303_309CTCCATC   | NA       | NA     | NA          | 89   | 0    | 2    | NA                      | NA                   |
| MO-50  |      | IL6     | chr7:22768404   | CTTCCAA          | CTCCAA  | NA             | 1295 | 1384 | 0.94             | fsSub        | NM_000591              | c.303_309CTCCAA    | NA       | NA     | NA          | 598  | 687  | 2    | NA                      | NA                   |
| MO-50  |      | KRAS    | chr12:25398284  | C                | G       | p.Gly12Ala     | 1074 | 1880 | 0.57             | missense     | NM_004985              | c.G35C             | NA       | NA     | rs121913529 | 548  | 526  | 2    | Hotspot                 | GoF                  |
| MO-50  |      | MED12   | chrX:70339254   | G                | G       | p.Gly44Asp     | 464  | 1183 | 0.39             | missense     | NM_005120              | c.G131A            | NA       | NA     | NA          | 252  | 212  | 2    | Hotspot                 | GoF                  |
| MO-50  |      | MTOR    | chr1:11190804   | C                | T       | p.Glu1799Lys   | 367  | 738  | 0.50             | missense     | NA                     | NA                 | NA       | NA     | NA          | NA   | NA   | NA   | Hotspot                 | GoF                  |
| MO-50  |      | NOTCH1  | chr9:139411801  | T                | C       | p.Glu493Gly    | 9    | 69   | 0.13             | missense     | NM_017617              | c.A1478G           | NA       | NA     | NA          | 8    | 1    | 1    | NA                      | NA                   |
| MO-50  |      | TP53    | chr17:7578403   | G                | T       | p.Cys176Tyr    | 534  | 636  | 0.84             | missense     | NM_000546              | c.G527A            | NA       | NA     | NA          | 235  | 299  | 1    | Hotspot                 | LoF                  |
| MO-51  |      | APC     | chr5:112176374  | A                | G       | p.Arg1695Gly   | 765  | 889  | 0.86             | missense     | NM_000038              | c.A5083G           | NA       | NA     | NA          | 374  | 391  | 1    | NA                      | NA                   |
| MO-51  |      | BRC2    | chr13:32914839  | A                | G       | p.His2116Arg   | 587  | 1486 | 0.40             | missense     | NM_000059              | c.A6347G           | 0.003538 | 0.0018 | rs55953736  | 321  | 266  | 1    | NA                      | NA                   |
| MO-51  |      | KRAS    | chr12:25398284  | C                | T       | p.Gly12Asp     | 901  | 1979 | 0.46             | missense     | NM_004985              | c.G35A             | NA       | NA     | rs121913529 | 419  | 482  | 2    | Hotspot                 | GoF                  |
| MO-51  |      | TP53    | chr17:7577574   | T                | C       | p.Tyr236Cys    | 797  | 1066 | 0.75             | missense     | NM_000546              | c.A707G            | NA       | NA     | NA          | 355  | 442  | 1    | Hotspot                 | LoF                  |
| MO-52  |      | APC     | chr5:112174973  | C                | T       | p.Gln1228Ter   | 70   | 568  | 0.12             | nonsense     | NM_000038              | c.C3682T           | NA       | NA     | NA          | 34   | 36   | 1    | Deleterious             | LoF                  |
| MO-52  |      | APC     | chr5:112174677  | T                | C       | p.Leu1129Ser   | 913  | 1722 | 0.53             | missense     | NM_000038              | c.T3386C           | 0.002384 | 0.0018 | rs143638171 | 537  | 376  | 3    | NA                      | NA                   |
| MO-52  |      | BRC2    | chr13:32945172  | A                | C       | p.Glu2856Ala   | 988  | 1999 | 0.49             | missense     | NM_000059              | c.A8567C           | 0.001461 | 0.0005 | rs11571747  | 518  | 470  | 1    | NA                      | NA                   |
| MO-52  |      | CDKN2A  | chr9:21971109   | G                | A       | p.R98X         | 272  | 1873 | 0.15             | nonsense     | NM_058195              | c.C292T            | NA       | NA     | NA          | 161  | 111  | 1    | NA                      | NA                   |
| MO-52  |      | ERBB2   | chr17:37879658  | G                | A       | p.Arg678Gln    | 96   | 500  | 0.19             | missense     | NM_004448              | c.G2033A           | NA       | NA     | NA          | 54   | 42   | 2    | Hotspot                 | GoF                  |
| MO-52  |      | ESR1    | chr6:152419991  | G                | A       | p.Val560Met    | 62   | 361  | 0.17             | missense     | NM_000125              | c.G1678A           | NA       | NA     | NA          | 31   | 31   | 1    | NA                      | NA                   |
| MO-52  |      | FBXW7   | chr4:153251948  | CT               | C       | p.Ser353fs     | 199  | 1260 | 0.16             | fsDel        | NM_018315              | c.817delA          | NA       | NA     | NA          | 91   | 108  | 4    | Deleterious             | LoF                  |
| MO-52  |      | FLT3    | chr13:28610124  | C                | T       | p.Gly456Arg    | 340  | 2000 | 0.17             | missense     | NM_004119              | c.G1366A           | NA       | NA     | NA          | 164  | 176  | 2    | NA                      | NA                   |
| MO-52  |      | GAS6    | chr13:114549506 | C                | T       | p.Val113Met    | 143  | 1642 | 0.09             | missense     | NM_000820              | c.G337A            | NA       | NA     | NA          | 62   | 81   | 1    | NA                      | NA                   |
| MO-52  |      | MAP2K2  | chr19:4117563   | G                | A       | p.Arg53Trp     | 147  | 784  | 0.19             | missense     | NM_030662              | c.C157T            | NA       | NA     | NA          | 73   | 74   | 1    | NA                      | NA                   |
| MO-52  |      | MYC     | chr8:128752816  | C                | T       | p.Ala326Val    | 317  | 2000 | 0.16             | missense     | NM_002467              | c.C977T            | NA       | NA     | NA          | 136  | 181  | 1    | NA                      | NA                   |
| MO-52  |      | NF1     | chr17:29667607  | G                | A       | p.Ala236Thr    | 160  | 1255 | 0.13             | missense     | NM_000267              | c.G6943A           | NA       | NA     | NA          | 81   | 79   | 1    | NA                      | NA                   |
| MO-52  |      | PPP2R1A | chr19:52715983  | G                | A       | p.Arg183Gln    | 133  | 878  | 0.15             | missense     | NM_014225              | c.G548A            | NA       | NA     | NA          | 57   | 76   | 3    | Hotspot                 | GoF                  |
| MO-52  |      | PTPN11  | chr12:112926872 | C                | T       | p.Arg498Trp    | 278  | 1991 | 0.14             | missense     | NM_002834              | c.C1492T           | NA       | NA     | NA          | 143  | 135  | 1    | NA                      | NA                   |
| MO-52  |      | TET2    | chr4:106197519  | G                | A       | p.Arg1951Gln   | 62   | 385  | 0.16             | missense     | NM_001127208           | c.G5852A           | NA       | NA     | NA          | 22   | 40   | 3    | NA                      | NA                   |
| MO-52  |      | TP53    | chr17:7577139   | G                | A       | p.Arg267Tyr    | 151  | 893  | 0.17             | missense     | NM_000546              | c.C799T            | NA       | NA     | rs55832599  | 77   | 74   | 1    | Hotspot                 | LoF                  |
| MO-52  |      | ZNF217  | chr20:52193535  | C                | T       | p.Ala590Thr    | 18   | 187  | 0.10             | missense     | NM_006526              | c.G1768A           | NA       | NA     | NA          | 10   | 8    | 1    | NA                      | NA                   |
| MO-53  |      | ABL1    | chr9:133753949  | G                | A       | p.Arg473Gln    | 1203 | 1620 | 0.74             | missense     | NM_005157              | c.G1418A           | 0.002999 | 0.0032 | rs62638716  | 618  | 585  | 1    | NA                      | NA                   |
| MO-53  |      | TP53    | chr17:7577609   | C                | A       | NA             | 474  | 787  | 0.6023           | splice       | NM_000546              | exon8:c.673-1G>T   | NA       | NA     | NA          | 219  | 255  | 2    | NA                      | NA                   |
| MO-54  |      | EGFR    | chr7:55242464   | AGGAATTAAGAGAAGC | A       | p.745_750del   | 1807 | 1981 | 0.91             | nonfsDel     | NM_005228              | c.2235_2249del     | NA       | NA     | rs121913421 | 1126 | 681  | 2    | Hotspot                 | GoF                  |
| MO-54  |      | PIK3CA  | chr3:178952085  | A                | G       | p.His1047Arg   | 95   | 2000 | 0.05             | missense     | NM_006218              | c.A3140G           | NA       | NA     | rs121913279 | 45   | 50   | 1    | Hotspot                 | GoF                  |
| MO-54  |      | TSC2    | chr16:2098717   | A                | C       | p.Lys34Thr     | 648  | 1999 | 0.32             | missense     | NM_000548              | c.A101C            | NA       | NA     | NA          | 328  | 320  | 3    | NA                      | NA                   |
| MO-55  |      | APC     | chr5:112116562  | C                | G       | p.Gln203Glu    | 958  | 1993 | 0.48             | missense     | NM_000038              | c.C607G            | 0.000308 | NA     | rs141576417 | 505  | 453  | 1    | NA                      | NA                   |
| MO-55  |      | BRAF    | chr7:140453138  | T                | TGTA    | p.Thr599dup    | 1017 | 1673 | 0.61             | nonfsIns     | NM_004333              | c.1796_1797insTAC  | NA       | NA     | NA          | 477  | 540  | 1    | Hotspot                 | GoF                  |
| MO-56  |      | APC     | chr5:112175211  | TAAAAG           | T       | p.Glu1309fs    | 574  | 1097 | 0.52             | fsDel        | NM_000038              | c.3921_3925del     | NA       | NA     | NA          | 258  | 316  | 4    | Deleterious             | LoF                  |
| MO-57  |      | IL6     | chr7:22768404   | CTTCCAA          | CTCCATC | NA             | 108  | 1928 | 0.06             | nonfsSub     | NM_000600              | c.303_309CTCCATC   | NA       | NA     | NA          | 108  | 0    | 2    | NA                      | NA                   |
| MO-57  |      | IL6     | chr7:22768404   | CTTCCAA          | CTCCAA  | NA             | 1820 | 1928 | 0.94             | fsSub        | NM_000600              | c.303_309CTCCAA    | NA       | NA     | NA          | 854  | 966  | 2    | NA                      | NA                   |
| MO-57  |      | KRAS    | chr12:25398285  | C                | A       | p.Gly12Cys     | 362  | 1880 | 0.19             | missense     | NM_004985              | c.G34T             | NA       | NA     | rs121913530 | 195  | 167  | 2    | Hotspot                 | GoF                  |
| MO-57  |      | MET     | chr7:116340177  | G                | A       | p.Ala347Thr    | 800  | 1575 | 0.51             | missense     | NM_000245              | c.G1039A           | 0.001065 | NA     | NA          | 392  | 408  | 1    | NA                      | NA                   |
| MO-57  |      | TSC1    | chr9:135779052  | G                | A       | p.His732Tyr    | 348  | 787  | 0.44             | missense     | NM_000368              | c.C2194T           | 0.002691 | 0.0023 | NA          | 167  | 181  | 1    | NA                      | NA                   |
| MO-58  |      | BRAF    | chr7:140453136  | A                | T       | p.Val600Glu    | 680  | 1733 | 0.39             | missense     | NM_004333              | c.T1799A           | NA       | NA     | rs113488022 | 356  | 324  | 1    | Hotspot                 | GoF                  |
| MO-58  |      | MYCN    | chr2:16085755   | G                | A       | p.Gly311Arg    | 952  | 1450 | 0.66             | missense     | NM_005378              | c.G931A            | NA       | NA     | NA          | 424  | 528  | 3    | NA                      | NA                   |
| MO-58  |      | TP53    | chr17:7578542   | G                | A       | p.Leu130Phe    | 228  | 575  | 0.40             | missense     | NM_000546              | c.C388T            | NA       | NA     | NA          | 77   | 151  | 3    | Hotspot                 | LoF                  |
| MO-58  |      | TSC1    | chr9:135787694  | AG               | G       | p.Pro296fs     | 460  | 506  | 0.91             | fsDel        | NM_000368              | c.887delC          | NA       | NA     | NA          | 319  | 141  | 3    | Deleterious             | LoF                  |
| MO-59  |      | APC     | chr5:112175390  | C                | T       | p.Gln1367Ter   | 1140 | 1998 | 0.57             | nonsense     | NM_000038              | c.C4099T           | NA       | NA     | rs121913328 | 592  | 548  | 1    | Deleterious             | LoF                  |
| MO-59  |      | ATM     | chr11:108235908 | C                | A       | p.Leu2984Met   | 985  | 1689 | 0.58             | missense     | NM_000051              | c.C8950A           | NA       | NA     | NA          | 545  | 445  | 1    | NA                      | NA                   |
| MO-59  |      | IDH1    | chr2:209113113  | G                | A       | p.Arg132Cys    | 596  | 2000 | 0.30             | missense     | NM_005896              | c.C394T            | NA       | NA     | rs121913499 | 330  | 265  | 1    | Hotspot                 | GoF                  |
| MO-59  |      | KRAS    | chr12:25398284  | C                | A       | p.Gly12Val     | 717  | 1861 | 0.39             | missense     | NM_004985              | c.G35T             | NA       | NA     | rs121913529 | 360  | 357  | 2    | Hotspot                 | GoF                  |
| MO-59  |      | TP53    | chr17:7578413   | C                | A       | p.Val173Leu    | 200  | 474  | 0.42             | missense     | NM_000546              | c.G517T            | NA       | NA     | NA          | 120  | 80   | 1    | Hotspot                 | LoF                  |
| MO-59  |      | APC     | chr5:112174982  | A                | G       | p.Leu1231Val   | 460  | 937  | 0.49             | missense     | NM_000038              | c.C3691G           | NA       | NA     | NA          | 213  | 247  | 1    | NA                      | NA                   |
| MO-60  |      | ATM     | chr11:108198397 | A                | G       | p.Tyr2334Cys   | 280  | 1053 | 0.27             | missense     | NM_000051              | c.A7001G           | NA       | NA     | NA          | 153  | 127  | 1    | NA                      | NA                   |
| MO-60  |      | ATM     | chr11:108155202 | T                | C       | NA             | 257  | 968  | 0.2655           | splice       | NM_000051              | exon26:c.3993-2T>C | NA       | NA     | NA          | 128  | 129  | 1    | NA                      | NA                   |
| MO-60  |      | CDH1    | chr16:68846045  | C                | T       | p.Pro339Leu    | 324  | 1204 | 0.27             | missense     | NM_004360              | c.C1016T           | NA       | NA     | NA          | 188  |      |      |                         |                      |

| Sample | Pair | Gene           | Location        | Ref | Alt | AA Change    | FAO  | FDP  | Variant Fraction | Variant Type      | Transcript ID (RefSeq) | Nucleotide Change  | ESP      | 1000G  | db135       | FSAF | FSAR | HRUN | Onncomine Variant Class | Onncomine Gene Class |
|--------|------|----------------|-----------------|-----|-----|--------------|------|------|------------------|-------------------|------------------------|--------------------|----------|--------|-------------|------|------|------|-------------------------|----------------------|
| MO-68  |      | <i>IFITM1</i>  | chr1:1314208    | CA  | AC  | p.Pro13His   | 156  | 1501 | 0.10             | missense,nonfsSub | NM_003641              | c.38_39AC          | NA       | NA     | NA          | 104  | 52   | 2    | NA                      | NA                   |
| MO-68  |      | <i>NOTCH1</i>  | chr9:139393661  | GC  | G   | p.Gly1995fs  | 232  | 232  | 1.00             | fsDel             | NM_017617              | c.5984delG         | NA       | NA     | NA          | 104  | 172  | 2    | Deleterious             | LoF                  |
| MO-68  |      | <i>STK11</i>   | chr19:1223057   | TG  | T   | p.Trp332fs   | 157  | 434  | 0.36             | fsDel             | NM_000455              | c.995delG          | NA       | NA     | NA          | 28   | 129  | 2    | Deleterious             | LoF                  |
| MO-69  |      | <i>KRAS</i>    | chr12:25380277  | G   | A   | p.Gln61Ter   | 18   | 275  | 0.07             | nonsense          | NM_004985              | c.C181T            | NA       | NA     | NA          | 11   | 7    | 1    | NA                      | NA                   |
| MO-70  |      | <i>MAP2K1</i>  | chr15:66727483  | G   | A   | p.Asp67Asn   | 222  | 1199 | 0.19             | missense          | NM_002755              | c.G199A            | NA       | NA     | NA          | 127  | 95   | 1    | NA                      | NA                   |
| MO-70  |      | <i>NF1</i>     | chr17:23556096  | TG  | T   | p.Gly622fs   | 398  | 1692 | 0.24             | fsDel             | NM_000267              | c.2464delG         | NA       | NA     | NA          | 181  | 217  | 2    | Deleterious             | LoF                  |
| MO-70  |      | <i>NF2</i>     | chr22:300057872 | TG  | T   | p.Asp354fs   | 1873 | 1985 | 0.94             | fsDel             | NM_000268              | c.1059delG         | NA       | NA     | NA          | 658  | 1215 | 3    | Deleterious             | LoF                  |
| MO-70  |      | <i>NOTCH1</i>  | chr9:139393661  | GC  | G   | p.Gly1995fs  | 638  | 638  | 1.00             | fsDel             | NM_017617              | c.5984delG         | NA       | NA     | NA          | 275  | 363  | 2    | Deleterious             | LoF                  |
| MO-70  |      | <i>NRAS</i>    | chr1:15256530   | G   | T   | p.Gln61Lys   | 709  | 1923 | 0.36             | missense          | NM_002524              | c.C181A            | NA       | NA     | rs121913254 | 389  | 320  | 1    | Hotspot                 | GoF                  |
| MO-70  |      | <i>STK11</i>   | chr19:1223057   | TG  | T   | p.Trp332fs   | 335  | 1030 | 0.33             | fsDel             | NM_000455              | c.995delG          | NA       | NA     | NA          | 129  | 206  | 2    | Deleterious             | LoF                  |
| MO-70  |      | <i>TP53</i>    | chr17:7578463   | CG  | C   | p.R156fs     | 195  | 1382 | 0.14             | fsDel             | NM_000546              | c.468delC          | NA       | NA     | NA          | 138  | 57   | 3    | NA                      | NA                   |
| MO-71  |      | <i>APC</i>     | chr5:112174862  | C   | T   | p.Gln1191Ter | 35   | 690  | 0.05             | nonsense          | NM_000038              | c.C3571T           | NA       | NA     | NA          | 22   | 13   | 1    | Deleterious             | LoF                  |
| MO-71  |      | <i>APC</i>     | chr5:112176863  | C   | T   | p.Arg1858Ter | 23   | 408  | 0.06             | nonsense          | NM_000038              | c.C5572T           | NA       | NA     | NA          | 7    | 16   | 1    | Deleterious             | LoF                  |
| MO-71  |      | <i>APC</i>     | chr5:112102954  | G   | A   | p.Gly97Arg   | 19   | 186  | 0.10             | nonsense          | NM_000038              | c.G289A            | NA       | NA     | NA          | 11   | 8    | 2    | NA                      | NA                   |
| MO-71  |      | <i>ATM</i>     | chr11:108203492 | C   | T   | p.Arg2598Ter | 47   | 912  | 0.05             | nonsense          | NM_000051              | c.C7792T           | 0.000154 | NA     | rs138941496 | 12   | 35   | 1    | Deleterious             | LoF                  |
| MO-71  |      | <i>ATM</i>     | chr11:108218066 | C   | T   | p.Ser2882Leu | 30   | 118  | 0.25             | missense          | NM_000051              | c.C8645T           | NA       | NA     | NA          | 18   | 12   | 1    | NA                      | NA                   |
| MO-71  |      | <i>ATM</i>     | chr11:108150282 | C   | T   | p.Gln1117Ter | 478  | 478  | 1.00             | nonsense          | NM_000051              | c.C3349T           | NA       | NA     | NA          | 292  | 186  | 1    | Deleterious             | LoF                  |
| MO-71  |      | <i>ATM</i>     | chr11:108121426 | A   | T   | NA           | 20   | 158  | 0.1266           | splice            | NM_000051              | exon10:c.1236-2A>T | NA       | NA     | NA          | 15   | 4    | 1    | NA                      | NA                   |
| MO-71  |      | <i>BRAF</i>    | chr7:140453136  | G   | A   | p.Val600Glu  | 708  | 944  | 0.75             | missense          | NM_004333              | c.T1799A           | NA       | NA     | rs113488022 | 351  | 357  | 1    | Hotspot                 | GoF                  |
| MO-71  |      | <i>BRCA2</i>   | chr13:32937345  | G   | A   | p.Arg2669Lys | 20   | 184  | 0.11             | missense          | NM_000059              | c.G8006A           | NA       | NA     | NA          | 10   | 10   | 1    | NA                      | NA                   |
| MO-71  |      | <i>BRCA2</i>   | chr13:32912940  | C   | T   | p.Thr1483Ile | 10   | 86   | 0.12             | missense          | NM_000059              | c.C4448T           | NA       | NA     | NA          | 9    | 1    | 1    | NA                      | NA                   |
| MO-71  |      | <i>BRCA2</i>   | chr13:32906451  | G   | T   | p.Cys279Tyr  | 14   | 120  | 0.12             | missense          | NM_000059              | c.G836A            | NA       | NA     | NA          | 11   | 3    | 1    | NA                      | NA                   |
| MO-71  |      | <i>BRCA2</i>   | chr13:32912922  | T   | C   | p.Ile1477Thr | 11   | 86   | 0.13             | missense          | NM_000059              | c.T4430C           | NA       | NA     | NA          | 4    | 7    | 2    | NA                      | NA                   |
| MO-71  |      | <i>BRCA2</i>   | chr13:32929209  | G   | A   | p.Val2407Ile | 46   | 236  | 0.19             | missense          | NM_000059              | c.G7219A           | NA       | NA     | NA          | 22   | 24   | 2    | NA                      | NA                   |
| MO-71  |      | <i>BRCA2</i>   | chr13:32900672  | G   | A   | p.Gly185Arg  | 57   | 265  | 0.22             | missense          | NM_000059              | c.G553A            | NA       | NA     | NA          | 28   | 29   | 2    | NA                      | NA                   |
| MO-71  |      | <i>BRCA2</i>   | chr13:32906593  | C   | G   | p.Ser326Arg  | 74   | 74   | 1.00             | missense          | NM_000059              | c.C978A            | 0.000846 | 0.0005 | rs28897706  | 33   | 41   | 1    | NA                      | NA                   |
| MO-71  |      | <i>BTX</i>     | chrX:100611200  | G   | A   | p.Pro469Leu  | 29   | 481  | 0.06             | missense          | NM_000061              | c.C1406T           | NA       | NA     | NA          | 16   | 13   | 4    | NA                      | NA                   |
| MO-71  |      | <i>CSNK2A1</i> | chr20:476395    | G   | A   | p.His160Tyr  | 49   | 681  | 0.07             | missense          | NM_001895              | c.C478T            | NA       | NA     | NA          | 16   | 33   | 4    | NA                      | NA                   |
| MO-71  |      | <i>EGFR</i>    | chr7:55273252   | C   | T   | p.Ala1192Val | 63   | 1253 | 0.05             | missense          | NM_005228              | c.C3575T           | NA       | NA     | NA          | 37   | 26   | 1    | NA                      | NA                   |
| MO-71  |      | <i>EGFR</i>    | chr7:55273293   | G   | A   | p.Glu1206Lys | 70   | 1240 | 0.06             | missense          | NM_005228              | c.G3616A           | NA       | NA     | NA          | 43   | 27   | 1    | NA                      | NA                   |
| MO-71  |      | <i>EGFR</i>    | chr7:55242485   | C   | T   | p.Ser752Phe  | 54   | 735  | 0.07             | missense          | NM_005228              | c.C2255T           | NA       | NA     | NA          | 27   | 27   | 1    | Hotspot                 | GoF                  |
| MO-71  |      | <i>FBXW7</i>   | chr4:153332508  | C   | T   | p.Val150Met  | 14   | 82   | 0.17             | missense          | NM_033632              | c.G448A            | NA       | NA     | NA          | 10   | 4    | 1    | NA                      | NA                   |
| MO-71  |      | <i>FGFR2</i>   | chr10:123274789 | C   | T   | p.Glu377Lys  | 32   | 471  | 0.07             | missense          | NM_000141              | c.C1129A           | NA       | NA     | NA          | 12   | 20   | 2    | NA                      | NA                   |
| MO-71  |      | <i>FLT3</i>    | chr13:28611391  | G   | T   | p.Gly414Arg  | 16   | 304  | 0.05             | missense          | NM_004119              | c.C1240A           | NA       | NA     | NA          | 8    | 8    | 2    | NA                      | NA                   |
| MO-71  |      | <i>FLT3</i>    | chr13:28610153  | C   | A   | p.Ser446Leu  | 111  | 1888 | 0.06             | missense          | NM_004119              | c.C1337T           | NA       | NA     | NA          | 58   | 53   | 1    | NA                      | NA                   |
| MO-71  |      | <i>JAK2</i>    | chr9:5072511    | G   | A   | p.Gly554Asp  | 35   | 692  | 0.05             | missense          | NM_004972              | c.G1661A           | NA       | NA     | NA          | 23   | 12   | 2    | NA                      | NA                   |
| MO-71  |      | <i>JAK2</i>    | chr9:5078373    | G   | T   | p.Arg687Met  | 28   | 310  | 0.09             | missense          | NM_004972              | c.G2060T           | NA       | NA     | NA          | 13   | 15   | 2    | NA                      | NA                   |
| MO-71  |      | <i>KDR</i>     | chr4:55953793   | C   | T   | p.Asp1215Asn | 104  | 1940 | 0.05             | missense          | NM_002253              | c.G3643A           | NA       | NA     | NA          | 53   | 51   | 1    | NA                      | NA                   |
| MO-71  |      | <i>KIT</i>     | chr4:55599353   | G   | A   | p.Gly827Arg  | 76   | 1279 | 0.06             | missense          | NM_000222              | c.G2479A           | NA       | NA     | NA          | 40   | 36   | 2    | NA                      | NA                   |
| MO-71  |      | <i>KNSTRN</i>  | chr15:40675151  | C   | T   | p.Gln39Ter   | 23   | 346  | 0.07             | nonsense          | NM_033286              | c.C115T            | NA       | NA     | NA          | 0    | 23   | 3    | NA                      | NA                   |
| MO-71  |      | <i>MDM2</i>    | chr12:69233130  | G   | A   | p.Arg332His  | 48   | 818  | 0.06             | missense          | NM_002392              | c.G995A            | NA       | NA     | NA          | 21   | 27   | 1    | NA                      | NA                   |
| MO-71  |      | <i>NF1</i>     | chr17:29592348  | T   | A   | p.Val1609Asp | 144  | 315  | 0.46             | missense          | NM_000267              | c.T4763A           | NA       | NA     | NA          | 46   | 98   | 2    | NA                      | NA                   |
| MO-71  |      | <i>PAX5</i>    | chr9:37015136   | G   | T   | p.Val90Ile   | 74   | 1454 | 0.05             | missense          | NM_016734              | c.G268A            | NA       | NA     | NA          | 32   | 42   | 2    | NA                      | NA                   |
| MO-71  |      | <i>PDGFRA</i>  | chr4:55133745   | A   | G   | p.Thr320Ala  | 20   | 394  | 0.05             | missense          | NM_006206              | c.A958G            | NA       | NA     | NA          | 13   | 7    | 1    | NA                      | NA                   |
| MO-71  |      | <i>PDGFRA</i>  | chr4:55144549   | G   | A   | p.Glu675Lys  | 41   | 734  | 0.06             | missense          | NM_006206              | c.G2023A           | NA       | NA     | NA          | 22   | 19   | 1    | NA                      | NA                   |
| MO-71  |      | <i>PDGFRA</i>  | chr4:55141083   | C   | T   | p.Pro577Ser  | 22   | 339  | 0.06             | missense          | NM_006206              | c.C1729T           | NA       | NA     | NA          | 13   | 9    | 3    | NA                      | NA                   |
| MO-71  |      | <i>PIK3CA</i>  | chr3:178916957  | G   | A   | p.Arg115Gln  | 14   | 265  | 0.05             | missense          | NM_006218              | c.G344A            | NA       | NA     | NA          | 5    | 9    | 1    | Hotspot                 | GoF                  |
| MO-71  |      | <i>PIK3CA</i>  | chr3:178927474  | A   | G   | p.Lys413Glu  | 20   | 271  | 0.07             | missense          | NM_006218              | c.A1237G           | NA       | NA     | NA          | 10   | 10   | 3    | NA                      | NA                   |
| MO-71  |      | <i>PPARG</i>   | chr3:12393098   | G   | T   | p.Glu3Lys    | 46   | 795  | 0.06             | missense          | NM_015869              | c.G7A              | NA       | NA     | NA          | 20   | 26   | 1    | NA                      | NA                   |
| MO-71  |      | <i>PTEN</i>    | chr10:89692941  | G   | A   | p.Arg142Gln  | 29   | 504  | 0.06             | missense          | NM_000314              | c.G425A            | NA       | NA     | NA          | 14   | 15   | 4    | Hotspot                 | LoF                  |
| MO-71  |      | <i>SF3B1</i>   | chr2:198266792  | C   | T   | p.Glu714Lys  | 46   | 859  | 0.05             | missense          | NM_012433              | c.G2140A           | NA       | NA     | NA          | 27   | 19   | 1    | NA                      | NA                   |
| MO-71  |      | <i>SMAD4</i>   | chr18:48581256  | G   | A   | p.Ser187Asn  | 53   | 519  | 0.10             | missense          | NM_005359              | c.G560A            | NA       | NA     | NA          | 36   | 17   | 1    | NA                      | NA                   |
| MO-71  |      | <i>SMAD4</i>   | chr18:48591910  | G   | A   | p.Gly358Glu  | 59   | 546  | 0.11             | missense          | NM_005359              | c.G1073A           | NA       | NA     | NA          | 31   | 28   | 2    | NA                      | NA                   |
| MO-71  |      | <i>SMAD4</i>   | chr18:48591846  | G   | A   | p.Glu337Lys  | 60   | 550  | 0.11             | missense          | NM_005359              | c.G1009A           | NA       | NA     | NA          | 37   | 23   | 1    | NA                      | NA                   |
| MO-71  |      | <i>TET2</i>    | chr4:106158280  | C   | T   | p.Pro1061Ser | 86   | 821  | 0.10             | missense          | NM_017628              | c.C3181T           | NA       | NA     | NA          | 48   | 38   | 2    | NA                      | NA                   |
| MO-72  |      | <i>APC</i>     | chr5:112175064  | C   | A   | p.Thr1265Lys | 149  | 543  | 0.27             | missense          | NM_000038              | c.C3773A           | NA       | NA     | NA          | 81   | 68   | 1    | NA                      | NA                   |
| MO-72  |      | <i>IFITM1</i>  | chr1:1314208    | CA  | AC  | p.Pro13His   | 118  | 1183 | 0.10             | missense,nonfsSub | NM_003641              | c.38_39AC          | NA       | NA     | NA          | 96   | 22   | 2    | NA                      | NA                   |
| MO-73  |      | <i>ATM</i>     | chr11:10818677  | G   | A   | p.L264fs     | 1128 | 1475 | 0.76             | fsDel             | NM_000546              | c.792delA          | NA       | NA     | NA          | 519  | 609  | 1    | NA                      | NA                   |
| MO-73  |      | <i>BRAF</i>    | chr7:140453136  | A   | G   | p.Val600Glu  | 304  | 1000 | 0.30             | missense          | NM_000059              | c.G6115A           | NA       | NA     | NA          | 519  | 129  | 1    | NA                      | NA                   |
| MO-73  |      | <i>CDH1</i>    | chr16:68862138  | GC  | G   | p.Pro744fs   | 486  | 1575 | 0.31             | fsDel             | NA                     | NA                 | NA       | NA     | rs113488022 | 141  | 163  | 1    | Hotspot                 | GoF                  |
| MO-73  |      | <i>CDKN2A</i>  | chr9:21974720   | C   | G   | p.Ala36Gly   | 20   | 445  | 0.04             | missense          | NA                     | NA                 | NA       | NA     | NA          | NA   | NA   | NA   | Deleterious             | LoF                  |
| MO-73  |      | <i>EGFR</i>    | chr7:55221732   | C   | T   | p.Thr259Met  | 297  | 904  | 0.33             | missense          | NM_005228              | c.C776T            | NA       | NA     | NA          | 146  | 151  | 1    | NA                      | NA                   |
| MO-73  |      | <i>FBXW7</i>   | chr4:153249384  | C   | T   | p.Arg465His  | 529  | 1917 | 0.28             | missense          | NM_018315              | c.G1154A           | NA       | NA     | NA          | 290  | 239  | 1    | Hotspot                 | LoF                  |
| MO-73  |      | <i>GNAS</i>    | chr20:57484420  | C   | T   | p.Arg201Cys  | 102  | 361  | 0.28             | missense          | NM_000516              | c.C601T            | NA       | NA     | rs11554273  | 27   | 75   | 2    | Hotspot                 | GoF                  |
| MO-73  |      | <i>JAK3</i>    | chr19:17946009  | G   | A   | p.Pro644Ser  | 629  | 1996 | 0.32             | missense          | NM_000215              | c.C1930T           | NA       | NA     | NA          | 309  | 320  | 4    | NA                      | NA                   |
| MO-73  |      | <i>MAP2K1</i>  | chr15:66727522  | G   | A   | p.Gly80Ser   | 163  | 545  | 0.30             | missense          | NM_002755              | c.G238A            | NA       | NA     | NA          | 76   | 87   | 2    | NA                      | NA                   |
| MO-73  |      | <i>NOTCH1</i>  | chr9:139417305  | G   | A   | p.Pro247Ser  | 33   | 99   | 0.33             | missense          | NM_017617              | c.C739T            | NA       | NA     | NA          | 14   | 19   | 2    | NA                      | NA                   |
| MO-73  |      | <i>TET2</i>    | chr4:106157741  | G   | T   | p.Arg881Met  | 643  | 1999 | 0.32             | missense          | NM_017628              | c.G2642T           | NA       | NA     | NA          | 339  | 304  | 2    | NA                      | NA                   |
| MO-74  |      | <i>APC</i>     | chr5:112173847  | GGA | G   | p.Arg856fs   | 176  | 1966 | 0.09             | fsIns             | NM_000038              | c.2556_2557insGA   | NA       | NA     | NA          | 94   | 82   | 2    | Deleterious             | LoF                  |
| MO-74  |      | <i>APC</i>     | chr5:112175647  | AC  | A   | p.Pro1453fs  | 384  | 1976 |                  |                   |                        |                    |          |        |             |      |      |      |                         |                      |

| Sample | Pair | Gene   | Location        | Ref       | Alt       | AA Change    | FAO  | FDP  | Variant Fraction | Variant Type | Transcript ID (RefSeq) | Nucleotide Change      | ESP      | 1000G  | db135       | FSAF | FSAR | HRUN | Onncomine Variant Class | Onncomine Gene Class |
|--------|------|--------|-----------------|-----------|-----------|--------------|------|------|------------------|--------------|------------------------|------------------------|----------|--------|-------------|------|------|------|-------------------------|----------------------|
| MO-80  |      | APC    | chr5:112174464  | A         | G         | p.Asp1058Gly | 184  | 391  | 0.47             | missense     | NM_000038              | c.A3173G               | 0.000846 | 0.0009 | rs148725540 | 94   | 90   | 1    | NA                      | NA                   |
| MO-80  |      | BRAF   | chr7:140481402  | C         | T         | p.Gly469Glu  | 475  | 1979 | 0.24             | missense     | NM_004333              | c.G1406A               | NA       | NA     | rs121913355 | 205  | 270  | 2    | Hotspot                 | GoF                  |
| MO-80  |      | BRCA1  | chr17:41245399  | A         | T         | p.Glu717Lys  | 609  | 1998 | 0.30             | missense     | NM_007294              | c.G2149A               | NA       | NA     | NA          | 243  | 366  | 1    | NA                      | NA                   |
| MO-80  |      | BRCA2  | chr13:32912058  | C         | G         | p.Lys1189Arg | 226  | 837  | 0.27             | missense     | NM_000259              | c.A3566G               | NA       | NA     | NA          | 97   | 129  | 3    | NA                      | NA                   |
| MO-80  |      | CDKN2A | chr9:21974679   | GG        | AA        | p.Gln50Ter   | 1075 | 1943 | 0.55             | nonfsDel     | NM_000077              | c.147_148TT            | NA       | NA     | NA          | 414  | 661  | 2    | Deleterious             | LoF                  |
| MO-80  |      | FGFR1  | chr8:38285870   | G         | A         | p.Pro181Ser  | 640  | 1999 | 0.32             | missense     | NM_015850              | c.C442T                | NA       | NA     | NA          | 445  | 195  | 2    | NA                      | NA                   |
| MO-80  |      | GATA3  | chr10:5115823   | C         | T         | p.Ser391Leu  | 119  | 458  | 0.26             | missense     | NM_020205              | c.C1169T               | NA       | NA     | NA          | 64   | 55   | 1    | NA                      | NA                   |
| MO-80  |      | HRAS   | chr11:534285    | C         | T         | p.Gly13Asp   | 179  | 608  | 0.29             | missense     | NM_002543              | c.G38A                 | NA       | NA     | rs104894226 | 87   | 92   | 2    | Hotspot                 | GoF                  |
| MO-80  |      | KDR    | chr4:5956220    | C         | T         | p.Arg1032Gln | 469  | 1929 | 0.23             | missense     | NM_005263              | c.G3095A               | NA       | NA     | NA          | 282  | 127  | 1    | Hotspot                 | GoF                  |
| MO-80  |      | KNSTRN | chr15:40675107  | C         | T         | p.Ser24Phe   | 142  | 311  | 0.46             | missense     | NM_033286              | c.C717T                | NA       | NA     | NA          | 69   | 73   | 3    | Hotspot                 | GoF                  |
| MO-80  |      | NF1    | chr17:29664530  | C         | T         | p.Ser2191Phe | 801  | 1748 | 0.46             | missense     | NM_000267              | c.C6509T               | NA       | NA     | NA          | 387  | 414  | 2    | NA                      | NA                   |
| MO-80  |      | PTCH1  | chr9:98209250   | T         | C         | p.Ile1430Val | 285  | 596  | 0.48             | missense     | NM_000264              | c.A4289G               | NA       | NA     | NA          | 152  | 133  | 1    | NA                      | NA                   |
| MO-80  |      | RB1    | chr13:49033906  | G         | A         | p.Trp681Ter  | 209  | 723  | 0.29             | nonsense     | NM_000321              | c.G2043A               | NA       | NA     | NA          | 98   | 111  | 2    | Deleterious             | LoF                  |
| MO-80  |      | RHOA   | chr3:49412941   | C         | T         | p.Asp28Asn   | 351  | 1212 | 0.29             | missense     | NM_001664              | c.G82A                 | NA       | NA     | NA          | 161  | 190  | 2    | NA                      | NA                   |
| MO-80  |      | TP53   | chr17:7577105   | GG        | AA        | NA           | 1300 | 1984 | 0.66             | nonfsSub     | NM_000546              | c.832_833TT            | NA       | NA     | NA          | 614  | 686  | 2    | NA                      | NA                   |
| MO-81  |      | ATM    | chr11:108224498 | G         | C         | p.Ala2893Pro | 157  | 1194 | 0.13             | missense     | NM_000051              | c.G8677C               | NA       | NA     | NA          | 85   | 72   | 1    | NA                      | NA                   |
| MO-81  |      | KRAS   | chr12:25398285  | C         | A         | p.Gly12Cys   | 184  | 1435 | 0.13             | missense     | NM_004985              | c.G34T                 | NA       | NA     | rs121913530 | 78   | 106  | 2    | Hotspot                 | GoF                  |
| MO-81  |      | MYO18A | chr17:27424854  | G         | C         | p.Leu1352Val | 228  | 1861 | 0.12             | missense     | NM_078471              | c.C4054G               | NA       | NA     | NA          | 139  | 89   | 1    | NA                      | NA                   |
| MO-81  |      | STK11  | chr19:1220504   | G         | T         | p.Glu199Asp  | 142  | 1137 | 0.12             | missense     | NM_000455              | c.G597T                | NA       | NA     | NA          | 31   | 111  | 2    | NA                      | NA                   |
| MO-82  |      | MYD88  | chr3:38182062   | T         | C         | p.Leu229Ser  | 224  | 856  | 0.26             | missense     | NM_001172567           | c.T686C                | 0.000308 | 0.0009 | rs148149492 | 124  | 100  | 2    | NA                      | NA                   |
| MO-82  |      | RB1    | chr13:49039504  | G         | A         | p.Arg830Lys  | 767  | 1738 | 0.44             | missense     | NM_000321              | c.G2489A               | NA       | NA     | NA          | 388  | 379  | 2    | NA                      | NA                   |
| MO-82  |      | TP53   | chr17:7579313   | G         | A         | p.Thr125Met  | 234  | 1526 | 0.15             | missense     | NM_000546              | c.C374T                | NA       | NA     | NA          | 118  | 116  | 1    | Hotspot                 | LoF                  |
| MO-82  |      | TP53   | chr17:7577097   | C         | A         | p.Asp281Tyr  | 570  | 2000 | 0.29             | missense     | NM_000546              | c.G841T                | NA       | NA     | NA          | 275  | 295  | 1    | Hotspot                 | LoF                  |
| MO-83  |      | EGFR   | chr7:55259515   | T         | G         | p.Leu858Arg  | 536  | 1994 | 0.27             | missense     | NM_005228              | c.T2573G               | NA       | NA     | rs121434568 | 289  | 247  | 1    | Hotspot                 | GoF                  |
| MO-84  |      | CBL    | chr11:119149000 | C         | T         | p.Ser407Phe  | 1111 | 1686 | 0.66             | missense     | NM_005188              | c.C1220T               | NA       | NA     | NA          | 543  | 568  | 2    | NA                      | NA                   |
| MO-84  |      | NF1    | chr17:29586086  | A         | G         | p.Lys1457Glu | 1213 | 1895 | 0.64             | missense     | NM_000267              | c.A4306G               | NA       | NA     | NA          | 592  | 621  | 4    | NA                      | NA                   |
| MO-84  |      | NRAS   | chr11:11528745  | C         | A         | p.Gly13Cys   | 990  | 1999 | 0.50             | missense     | NM_002524              | c.G37T                 | NA       | NA     | rs121434595 | 253  | 467  | 2    | Hotspot                 | GoF                  |
| MO-84  |      | TET2   | chr4:106197411  | C         | T         | p.Ala1915Val | 538  | 1999 | 0.27             | missense     | NM_001127208           | c.C5744T               | NA       | NA     | NA          | 282  | 256  | 1    | NA                      | NA                   |
| MO-85  |      | ATM    | chr11:108126976 | G         | A         | p.Arg720His  | 496  | 990  | 0.50             | missense     | NM_000051              | c.G2159A               | NA       | NA     | rs55830714  | 259  | 237  | 1    | NA                      | NA                   |
| MO-85  |      | BRAF   | chr7:140453136  | A         | T         | p.Val600Glu  | 74   | 810  | 0.09             | missense     | NM_004333              | c.T1799A               | NA       | NA     | rs113488022 | 50   | 24   | 1    | Hotspot                 | GoF                  |
| MO-85  |      | SMO    | chr7:128846363  | A         | T         | p.Arg400His  | 798  | 1724 | 0.46             | missense     | NM_005631              | c.G1199A               | NA       | NA     | NA          | 428  | 370  | 1    | NA                      | NA                   |
| MO-86  |      | BRAF   | chr7:140453136  | A         | T         | p.Val600Glu  | 911  | 1999 | 0.46             | missense     | NM_004333              | c.T1799A               | NA       | NA     | rs113488022 | 458  | 453  | 1    | Hotspot                 | GoF                  |
| MO-86  |      | MSH2   | chr2:47630458   | A         | G         | p.Tyr43Cys   | 585  | 1230 | 0.48             | missense     | NM_002521              | c.A128G                | 0.000077 | NA     | rs17217723  | 297  | 288  | 1    | NA                      | NA                   |
| MO-88  |      | PIK3CA | chr3:178936091  | G         | A         | p.Glu545Lys  | 236  | 1998 | 0.12             | missense     | NM_006218              | c.G1633A               | NA       | NA     | rs104886003 | 113  | 123  | 1    | Hotspot                 | GoF                  |
| MO-88  |      | STK11  | chr19:1221246   | G         | T         | p.Gly257Trp  | 225  | 1648 | 0.14             | missense     | NM_000455              | c.G769T                | NA       | NA     | NA          | 121  | 104  | 4    | NA                      | NA                   |
| MO-88  |      | TP53   | chr17:7578461   | C         | A         | p.Val157Phe  | 228  | 1998 | 0.11             | missense     | NM_000546              | c.G469T                | NA       | NA     | rs121912654 | 128  | 100  | 1    | Hotspot                 | LoF                  |
| MO-89  |      | BRCA1  | chr17:41246061  | C         | C         | p.Arg496His  | 896  | 1996 | 0.45             | missense     | NM_007294              | c.G1487A               | 0.000615 | NA     | rs28897677  | 442  | 454  | 1    | NA                      | NA                   |
| MO-89  |      | KRAS   | chr12:25398285  | C         | A         | p.Gly12Cys   | 988  | 1904 | 0.52             | missense     | NM_004985              | c.G34T                 | NA       | NA     | rs121913530 | 530  | 458  | 2    | Hotspot                 | GoF                  |
| MO-89  |      | PTEN   | chr10:89692884  | A         | T         | p.His123Leu  | 990  | 1997 | 0.50             | missense     | NM_000314              | c.A368T                | NA       | NA     | NA          | 523  | 467  | 1    | Hotspot                 | LoF                  |
| MO-89  |      | SF3B1  | chr2:198267484  | G         | A         | p.Arg625Cys  | 697  | 2000 | 0.35             | missense     | NM_012433              | c.C1873T               | NA       | NA     | NA          | 374  | 323  | 2    | Hotspot                 | GoF                  |
| MO-90  |      | BRAF   | chr7:140453136  | A         | T         | p.Val600Glu  | 570  | 1400 | 0.41             | missense     | NM_004333              | c.T1799A               | NA       | NA     | rs113488022 | 252  | 318  | 1    | Hotspot                 | GoF                  |
| MO-90  |      | PTEN   | chr10:89692901  | G         | T         | p.Gly129Ter  | 632  | 1483 | 0.43             | nonsense     | NM_000314              | c.G385T                | NA       | NA     | NA          | 329  | 303  | 3    | Deleterious             | LoF                  |
| MO-91  |      | APC    | chr5:112174223  | C         | G         | p.Gln978Ter  | 756  | 1494 | 0.54             | nonsense     | NM_000038              | c.C2932T               | NA       | NA     | NA          | 387  | 369  | 1    | Deleterious             | LoF                  |
| MO-91  |      | BRCA2  | chr13:32911278  | T         | C         | p.Leu929Ser  | 975  | 1585 | 0.62             | missense     | NM_000059              | c.T2786C               | 0.003769 | 0.0018 | rs2227943   | 365  | 610  | 4    | NA                      | NA                   |
| MO-91  |      | BRCA2  | chr13:32911452  | A         | T         | p.Asn987Ile  | 410  | 666  | 0.62             | missense     | NM_000059              | c.A2960T               | 0.003695 | 0.0018 | rs2227944   | 189  | 221  | 2    | NA                      | NA                   |
| MO-91  |      | TP53   | chr17:7577061   | C         | CT        | p.Gly293fs   | 803  | 931  | 0.86             | fsIns        | NM_000546              | c.876dupA              | NA       | NA     | NA          | 392  | 411  | 3    | Deleterious             | LoF                  |
| MO-91  |      | ZNF217 | chr20:51299238  | G         | T         | p.Thr43Asn   | 1213 | 1998 | 0.61             | missense     | NM_006526              | c.C128A                | 0.000615 | NA     | rs139129142 | 581  | 632  | 2    | NA                      | NA                   |
| MO-92  |      | APC    | chr5:112179396  | CAAAACAAA | CAAAACAAT | NA           | 47   | 440  | 0.11             | nonfsSub     | NM_000038              | c.8105_8113CAAAACAAAAT | NA       | NA     | NA          | 47   | 0    | 4    | NA                      | NA                   |
| MO-92  |      | APC    | chr5:112179102  | A         | C         | p.Asn2604Thr | 38   | 319  | 0.12             | missense     | NM_000038              | c.A7811C               | NA       | NA     | NA          | 37   | 1    | 4    | NA                      | NA                   |
| MO-92  |      | APC    | chr5:112179148  | AT        | ATT       | p.Ser2621fs  | 120  | 635  | 0.19             | fsIns        | NA                     | NA                     | NA       | NA     | NA          | NA   | NA   | NA   | Deleterious             | LoF                  |
| MO-92  |      | APC    | chr5:112174658  | CA        | CAA       | p.Asn1124fs  | 478  | 1985 | 0.24             | fsIns        | NM_000038              | c.3368dupA             | NA       | NA     | NA          | 67   | 411  | 4    | Deleterious             | LoF                  |
| MO-92  |      | APC    | chr5:112176520  | GAAA      | GAGA      | NA           | 209  | 823  | 0.25             | nonfsSub     | NM_000038              | c.5229_5232GAGA        | NA       | NA     | NA          | 0    | 209  | 5    | NA                      | NA                   |
| MO-92  |      | APC    | chr5:112173339  | GCTT      | C         | p.Leu684fs   | 53   | 162  | 0.33             | fsDel        | NM_000038              | c.2049delT             | NA       | NA     | NA          | 3    | 50   | 3    | Deleterious             | LoF                  |
| MO-92  |      | APC    | chr5:112179140  | GA        | GAA       | p.Asn2618fs  | 206  | 492  | 0.42             | fsIns        | NA                     | NA                     | NA       | NA     | NA          | NA   | NA   | NA   | Deleterious             | LoF                  |
| MO-92  |      | APC    | chr5:112175951  | GAAA      | GA        | p.Lys1555fs  | 92   | 194  | 0.47             | fsDel        | NA                     | NA                     | NA       | NA     | NA          | NA   | NA   | NA   | Deleterious             | LoF                  |
| MO-92  |      | APC    | chr5:112175656  | TA        | T         | p.Ala1457fs  | 826  | 1391 | 0.59             | fsDel        | NA                     | NA                     | NA       | NA     | NA          | NA   | NA   | NA   | Deleterious             | LoF                  |
| MO-92  |      | APC    | chr5:112176520  | GAAA      | GAA       | p.K1744fs    | 614  | 823  | 0.75             | fsDel        | NM_000038              | c.5232delA             | NA       | NA     | NA          | 414  | 200  | 5    | NA                      | NA                   |
| MO-92  |      | APC    | chr5:112176906  | GCT       | GC        | p.Phe1840fs  | 205  | 271  | 0.76             | fsDel        | NM_000038              | c.5517delT             | NA       | NA     | NA          | 99   | 106  | 4    | Deleterious             | LoF                  |
| MO-92  |      | APC    | chr5:112179396  | CAAAACAAA | CAAAACAAA | NA           | 393  | 440  | 0.89             | fsSub        | NM_000038              | c.8105_8113CAAAACAAA   | NA       | NA     | NA          | 331  | 62   | 4    | NA                      | NA                   |
| MO-92  |      | APC    | chr5:112170781  | CAA       | CA        | p.N627fs     | 261  | 292  | 0.89             | fsDel        | NM_000038              | c.1879delA             | NA       | NA     | NA          | 336  | 125  | 3    | NA                      | NA                   |
| MO-92  |      | APC    | chr5:112173282  | CTTTA     | CTTA      | p.N627fs     | 53   | 57   | 0.93             | fsSub        | NM_000038              | c.1991_1995CTTA        | NA       | NA     | NA          | 50   | 3    | 3    | NA                      | NA                   |
| MO-92  |      | APC    | chr5:112164603  | TAA       | TA        | p.K560fs     | 67   | 71   | 0.94             | fsDel        | NM_000038              | c.1679delA             | NA       | NA     | NA          | 26   | 41   | 5    | NA                      | NA                   |
| MO-92  |      | APC    | chr5:112174475  | CA        | C         | p.Ser1063fs  | 752  | 752  | 1.00             | fsDel        | NA                     | NA                     | NA       | NA     | NA          | NA   | NA   | NA   | Deleterious             | LoF                  |
| MO-92  |      | APC    | chr5:112176340  | ATTGGA    | ATTGA     | p.Phe1684fs  | 377  | 377  | 1.00             | fsDel        | NA                     | NA                     | NA       | NA     | NA          | NA   | NA   | NA   | Deleterious             | LoF                  |
| MO-92  |      | ATM    | chr11:108172415 | ATT       | AT        | p.I1740fs    | 175  | 1404 | 0.12             | fsDel        | NM_000051              | c.5220delT             | NA       | NA     | NA          | 175  | 0    | 4    | NA                      | NA                   |
| MO-92  |      | ATM    | chr11:108124551 | CAA       | CAC       | NA           | 92   | 352  | 0.26             | nonfsSub     | NM_000051              | c.1909_1911CAC         | NA       | NA     | NA          | 0    | 92   | 5    | NA                      | NA                   |
| MO-92  |      | ATM    | chr11:108124551 | CAA       | C         | p.637_637del | 96   | 352  | 0.27             | fsDel        | NM_000051              | c.1910_1911del         | NA       | NA     | NA          | 29   | 67   | 5    | NA                      | NA                   |
| MO-92  |      | ATM    | chr11:108115519 | GAA       | G         | p.Lys224fs   | 442  | 1239 | 0.36             | fsDel        | NA                     | NA                     | NA       | NA     | NA          | NA   | NA   | NA   | Deleterious             | LoF                  |
| MO-92  |      | ATM    | chr11:108121536 | T         | TG        | p.Glu450fs   | 252  | 648  | 0.39             | fsIns        | NM_000051              | c.1345dupG             | NA       | NA     | NA          | 93   | 159  | 4    | Deleterious             | LoF                  |
| MO-92  |      | ATM    | chr11:108124551 | CAA       | CA        |              |      |      |                  |              |                        |                        |          |        |             |      |      |      |                         |                      |

| Sample | Pair | Gene           | Location        | Ref        | Alt       | AA Change      | FAO  | FDP  | Variant Fraction | Variant Type | Transcript ID (RefSeq) | Nucleotide Change  | ESP | 1000G | db135      | FSAF | FSAR | HRUN | Onncomine Variant Class | Onncomine Gene Class |    |
|--------|------|----------------|-----------------|------------|-----------|----------------|------|------|------------------|--------------|------------------------|--------------------|-----|-------|------------|------|------|------|-------------------------|----------------------|----|
| MO-92  |      | <i>BRCA1</i>   | chr17:41245384  | CAAA       | CAA       | p.F271fs       | 440  | 507  | 0.87             | fsDel        | NM_007294              | c.2161delT         | NA  | NA    | NA         | 2    | 438  | 3    | NA                      | NA                   |    |
| MO-92  |      | <i>BRCA1</i>   | chr17:41231395  | CT         | C         | p.Arg1460fs    | 1106 | 1250 | 0.88             | fsDel        | NM_007300              | c.4378delA         | NA  | NA    | NA         | 54   | 1052 | 3    | Deleterious             | LoF                  |    |
| MO-92  |      | <i>BRCA1</i>   | chr17:41228610  | CTT        | C         | p.Ser1481fs    | 395  | 434  | 0.91             | fsDel        | NM_007294              | c.4377_4378del     | NA  | NA    | NA         | 205  | 190  | 4    | Deleterious             | LoF                  |    |
| MO-92  |      | <i>BRCA1</i>   | chr17:41245435  | CATTGTG    | CATTG     | p.Asn704fs     | 1947 | 1992 | 0.98             | fsDel        | NM_007294              | c.2108_2113CAATG   | NA  | NA    | NA         | 1779 | 168  | 3    | Deleterious             | LoF                  |    |
| MO-92  |      | <i>BRCA1</i>   | chr17:41245329  | ACTTTTA    | ACTTA     | p.Val740fs     | 271  | 277  | 0.98             | fsDel        | NA                     | NA                 | NA  | NA    | NA         | NA   | NA   | NA   | Deleterious             | LoF                  |    |
| MO-92  |      | <i>BRCA1</i>   | chr17:41243848  | CT         | C         | p.Val1234fs    | 916  | 917  | 1.00             | fsDel        | NA                     | NA                 | NA  | NA    | NA         | NA   | NA   | NA   | Deleterious             | LoF                  |    |
| MO-92  |      | <i>BRCA1</i>   | chr17:41244258  | CTTTG      | CTTG      | p.Ser1087fs    | 1805 | 1805 | 1.00             | fsDel        | NA                     | NA                 | NA  | NA    | NA         | NA   | NA   | NA   | Deleterious             | LoF                  |    |
| MO-92  |      | <i>BRCA2</i>   | chr13:32912770  | ATTTT      | A         | p.Phe1428fs    | NA   | NA   | 0.00             | fsDel        | NM_000059              | c.4279_4282del     | NA  | NA    | NA         | NA   | NA   | NA   | Deleterious             | LoF                  |    |
| MO-92  |      | <i>BRCA2</i>   | chr13:32911382  | A          | T         | p.Lys964Ter    | 38   | 489  | 0.08             | nonsense     | NA                     | NA                 | NA  | NA    | NA         | NA   | NA   | NA   | Deleterious             | LoF                  |    |
| MO-92  |      | <i>BRCA2</i>   | chr13:32900284  | T          | C         | p.Val151Glu    | 10   | 96   | 0.10             | missense     | NM_000059              | c.T452A            | NA  | NA    | NA         | 10   | 0    | 1    | NA                      | NA                   |    |
| MO-92  |      | <i>BRCA2</i>   | chr13:32913435  | CAA        | C         | p.1648_1649del | 25   | 216  | 0.12             | fsDel        | NM_000059              | c.4944_4945del     | NA  | NA    | NA         | 0    | 25   | 5    | NA                      | NA                   |    |
| MO-92  |      | <i>BRCA2</i>   | chr13:32907368  | A          | G         | p.Lys585Glu    | 23   | 198  | 0.12             | missense     | NM_000059              | c.A1753G           | NA  | NA    | NA         | 23   | 0    | 5    | NA                      | NA                   |    |
| MO-92  |      | <i>BRCA2</i>   | chr13:32913435  | CAA        | CAAA      | p.Ser1650fs    | 44   | 216  | 0.20             | fsIns        | NM_000059              | c.4945dupA         | NA  | NA    | NA         | 1    | 43   | 5    | Deleterious             | LoF                  |    |
| MO-92  |      | <i>BRCA2</i>   | chr13:32930740  | TA         | TAA       | p.K2538fs      | 517  | 1779 | 0.29             | fsIns        | NM_000059              | c.7612dupA         | NA  | NA    | NA         | 1    | 516  | 3    | NA                      | NA                   |    |
| MO-92  |      | <i>BRCA2</i>   | chr13:32907202  | T          | A         | p.Phe529Leu    | 503  | 1360 | 0.37             | missense     | NM_000059              | c.T1587A           | NA  | NA    | NA         | 5    | 498  | 3    | NA                      | NA                   |    |
| MO-92  |      | <i>BRCA2</i>   | chr13:32972355  | CAA        | C         | p.Arg3237fs    | 39   | 100  | 0.39             | fsDel        | NM_000059              | c.9706_9707del     | NA  | NA    | NA         | 7    | 32   | 4    | Deleterious             | LoF                  |    |
| MO-92  |      | <i>BRCA2</i>   | chr13:32910921  | CCAAAA     | CCAA      | p.Asn812fs     | 113  | 278  | 0.41             | fsDel        | NA                     | NA                 | NA  | NA    | NA         | NA   | NA   | NA   | Deleterious             | LoF                  |    |
| MO-92  |      | <i>BRCA2</i>   | chr13:32930740  | TA         | T         | p.K2538fs      | 920  | 1779 | 0.52             | fsDel        | NM_000059              | c.7612delA         | NA  | NA    | NA         | 871  | 49   | 3    | NA                      | NA                   |    |
| MO-92  |      | <i>BRCA2</i>   | chr13:32972355  | CAA        | CA        | p.K3236fs      | 57   | 100  | 0.57             | fsDel        | NM_000059              | c.9707delA         | NA  | NA    | NA         | 0    | 57   | 4    | NA                      | NA                   |    |
| MO-92  |      | <i>BRCA2</i>   | chr13:32988877  | TAAAGTTTTG | TAAGTTTTG | p.Lys3104fs    | 631  | 855  | 0.74             | fsDel        | NA                     | NA                 | NA  | NA    | NA         | NA   | NA   | NA   | Deleterious             | LoF                  |    |
| MO-92  |      | <i>BRCA2</i>   | chr13:32929205  | CT         | C         | p.Phe2406fs    | 69   | 78   | 0.88             | fsDel        | NM_000059              | c.7216delT         | NA  | NA    | NA         | 38   | 31   | 3    | Deleterious             | LoF                  |    |
| MO-92  |      | <i>BRCA2</i>   | chr13:32983249  | CTT        | C         | p.Ser36fs      | 336  | 367  | 0.92             | fsDel        | NM_000059              | c.104_105del       | NA  | NA    | NA         | 80   | 256  | 3    | Deleterious             | LoF                  |    |
| MO-92  |      | <i>BRCA2</i>   | chr13:32988962  | CA         | C         | p.Lys3132fs    | 482  | 515  | 0.94             | fsDel        | NM_000059              | c.9394delA         | NA  | NA    | NA         | 427  | 55   | 3    | Deleterious             | LoF                  |    |
| MO-92  |      | <i>BRCA2</i>   | chr13:32911946  | TTAAAG     | TTAAG     | p.Lys1153fs    | 1044 | 1102 | 0.95             | fsDel        | NA                     | NA                 | NA  | NA    | NA         | NA   | NA   | NA   | Deleterious             | LoF                  |    |
| MO-92  |      | <i>BRCA2</i>   | chr13:32913836  | CAAAAA     | CA        | p.Lys1783fs    | 28   | 29   | 0.97             | fsDel        | NM_000059              | c.5346_5349del     | NA  | NA    | NA         | 23   | 5    | 7    | Deleterious             | LoF                  |    |
| MO-92  |      | <i>BRCA2</i>   | chr13:32980657  | CA         | C         | p.Ala22fs      | 256  | 263  | 0.97             | fsDel        | NA                     | NA                 | NA  | NA    | NA         | NA   | NA   | NA   | Deleterious             | LoF                  |    |
| MO-92  |      | <i>BRCA2</i>   | chr13:32907382  | GTTTA      | GTTA      | p.Phe590fs     | 209  | 214  | 0.98             | fsDel        | NA                     | NA                 | NA  | NA    | NA         | NA   | NA   | NA   | Deleterious             | LoF                  |    |
| MO-92  |      | <i>BRCA2</i>   | chr13:32971118  | TA         | T         | p.Asp3197fs    | 353  | 358  | 0.99             | fsDel        | NM_000059              | c.9586delA         | NA  | NA    | NA         | 63   | 290  | 3    | Deleterious             | LoF                  |    |
| MO-92  |      | <i>BRCA2</i>   | chr13:32929199  | CA         | C         | p.Val2405fs    | 71   | 72   | 0.99             | fsDel        | NM_000059              | c.7210delA         | NA  | NA    | NA         | 46   | 25   | 3    | Deleterious             | LoF                  |    |
| MO-92  |      | <i>BRCA2</i>   | chr13:32911820  | GA         | G         | p.Ile1111fs    | 196  | 196  | 1.00             | fsDel        | NM_000059              | c.3329delA         | NA  | NA    | NA         | 2    | 194  | 3    | Deleterious             | LoF                  |    |
| MO-92  |      | <i>BRCA2</i>   | chr13:32912670  | CGA        | CG        | p.Ala1395fs    | 1760 | 1760 | 1.00             | fsDel        | NA                     | NA                 | NA  | NA    | NA         | NA   | NA   | NA   | Deleterious             | LoF                  |    |
| MO-92  |      | <i>BRCA2</i>   | chr13:32912834  | AATTTCTTTG | ATTTCTTTG | p.Asn1448fs    | 124  | 124  | 1.00             | fsDel        | NA                     | NA                 | NA  | NA    | NA         | NA   | NA   | NA   | Deleterious             | LoF                  |    |
| MO-92  |      | <i>BRCA2</i>   | chr13:32972540  | CATTT      | CATT      | p.Gln3299fs    | 583  | 583  | 1.00             | fsDel        | NM_000059              | c.9894delT         | NA  | NA    | NA         | 347  | 236  | 3    | Deleterious             | LoF                  |    |
| MO-92  |      | <i>CBL</i>     | chr11:119149242 | CT         | CC        | NA             | 109  | 1996 | 0.05             | nonfsSub     | NM_005188              | c.1250_1251CC      | NA  | NA    | NA         | 0    | 109  | 3    | NA                      | NA                   |    |
| MO-92  |      | <i>CBL</i>     | chr11:119149242 | CT         | C         | p.P417fs       | 1856 | 1996 | 0.93             | fsDel        | NM_005188              | c.1251delT         | NA  | NA    | NA         | 1111 | 745  | 3    | NA                      | NA                   |    |
| MO-92  |      | <i>CBL</i>     | chr11:119148952 | TA         | T         | p.V391fs       | 211  | 211  | 1.00             | fsDel        | NM_005188              | c.1173delA         | NA  | NA    | NA         | 31   | 180  | 3    | NA                      | NA                   |    |
| MO-92  |      | <i>CCNE1</i>   | chr19:30312631  | A          | AG        | p.E204fs       | 80   | 241  | 0.33             | fsIns        | NM_001238              | c.612_613insG      | NA  | NA    | NA         | 80   | 0    | 0    | NA                      | NA                   |    |
| MO-92  |      | <i>CDH1</i>    | chr16:68862157  | C          | CGG       | p.Arg749fs     | 161  | 1629 | 0.10             | fsIns        | NM_004360              | c.2245_2246insCG   | NA  | NA    | NA         | 54   | 107  | 3    | Deleterious             | LoF                  |    |
| MO-92  |      | <i>CDH1</i>    | chr16:68842438  | GAAAAAG    | GAAAGAA   | NA             | 30   | 213  | 0.14             | nonfsSub     | NM_004360              | c.499_505GAAAAAGAA | NA  | NA    | NA         | 30   | 0    | 5    | NA                      | NA                   |    |
| MO-92  |      | <i>CDH1</i>    | chr16:68856088  | C          | CG        | p.Ala634fs     | 178  | 703  | 0.25             | fsIns        | NM_004360              | c.1897dupG         | NA  | NA    | NA         | 126  | 52   | 4    | Deleterious             | LoF                  |    |
| MO-92  |      | <i>CDH1</i>    | chr16:68842627  | T          | G         | p.Val188Gly    | 133  | 230  | 0.58             | missense     | NM_004360              | c.T563G            | NA  | NA    | NA         | 9    | 124  | 4    | NA                      | NA                   |    |
| MO-92  |      | <i>CDH1</i>    | chr16:68842438  | GAAAAAG    | GAAAAAGA  | NA             | 179  | 213  | 0.84             | nonfsSub     | NM_004360              | c.499_505GAAAAAGA  | NA  | NA    | NA         | 179  | 0    | 5    | NA                      | NA                   |    |
| MO-92  |      | <i>CDH1</i>    | chr16:68863559  | CTTT       | CTT       | p.Phe767fs     | 94   | 105  | 0.90             | fsDel        | NA                     | NA                 | NA  | NA    | NA         | NA   | NA   | NA   | Deleterious             | LoF                  |    |
| MO-92  |      | <i>CDKN2A</i>  | chr9:21971094   | CT         | TC        | p.Glu88Gly     | 26   | 226  | 0.12             | missense     | NA                     | NA                 | NA  | NA    | NA         | NA   | NA   | NA   | Hotspot                 | LoF                  |    |
| MO-92  |      | <i>CSNK2A1</i> | chr20:470448    | GAAA       | GATG      | NA             | 23   | 378  | 0.06             | nonfsSub     | NM_001895              | c.696_699CATC      | NA  | NA    | NA         | 0    | 23   | 5    | NA                      | NA                   |    |
| MO-92  |      | <i>CSNK2A1</i> | chr20:470448    | GAAA       | GAA       | p.F232fs       | 355  | 378  | 0.94             | fsDel        | NM_001895              | c.696delT          | NA  | NA    | NA         | 346  | 9    | 5    | NA                      | NA                   |    |
| MO-92  |      | <i>DNMT3A</i>  | chr2:25457159   | CA         | C         | p.Phe909fs     | 206  | 206  | 1.00             | fsDel        | NM_022552              | c.2727delT         | NA  | NA    | NA         | 83   | 123  | 4    | NA                      | NA                   |    |
| MO-92  |      | <i>EGFR</i>    | chr7:55273294   | AATTTTA    | AATTA     | p.Phe1207fs    | 721  | 772  | 0.93             | fsDel        | NM_005228              | c.3617_3622AATTA   | NA  | NA    | NA         | 101  | 620  | 3    | NA                      | NA                   |    |
| MO-92  |      | <i>ERBB3</i>   | chr12:56482331  | CT         | C         | p.Phe294fs     | 1222 | 1222 | 1.00             | fsDel        | NM_001982              | c.880delT          | NA  | NA    | NA         | 512  | 710  | 3    | NA                      | NA                   |    |
| MO-92  |      | <i>ERBB3</i>   | chr12:56482331  | ATT        | ATG       | NA             | 132  | 606  | 0.22             | nonfsSub     | NM_005235              | c.541_543CAT       | NA  | NA    | NA         | 132  | 0    | 3    | NA                      | NA                   |    |
| MO-92  |      | <i>ERBB4</i>   | chr12:216252763 | ATT        | ATG       | p.N181fs       | 474  | 606  | 0.78             | fsDel        | NM_005235              | c.541delA          | NA  | NA    | NA         | 9    | 465  | 3    | NA                      | NA                   |    |
| MO-92  |      | <i>ERBB4</i>   | chr12:216252763 | ATT        | ATG       | p.688_689del   | 73   | 381  | 0.19             | fsDel        | NM_004456              | c.2063_2066del     | NA  | NA    | NA         | 73   | 0    | 2    | NA                      | NA                   |    |
| MO-92  |      | <i>EZH2</i>    | chr7:148506442  | ACGAATTT   | ACGA      | NA             | 308  | 381  | 0.81             | fsSub        | NM_004456              | c.2063_2070AATCGT  | NA  | NA    | NA         | 203  | 4    | 304  | 2                       | NA                   | NA |
| MO-92  |      | <i>EZH2</i>    | chr7:148506442  | ACGAATTT   | ACGATT    | NA             | 213  | 1740 | 0.12             | nonfsSub     | NM_033632              | c.33_35GAG         | NA  | NA    | NA         | 213  | 0    | 4    | NA                      | NA                   |    |
| MO-92  |      | <i>FBXW7</i>   | chr4:153332921  | CTT        | CTTC      | NA             | 19   | 138  | 0.14             | nonfsSub     | NM_018315              | c.208_213GAAAT     | NA  | NA    | NA         | 1    | 18   | 5    | NA                      | NA                   |    |
| MO-92  |      | <i>FBXW7</i>   | chr4:153273670  | ATTTTT     | ATTTT     | NA             | 93   | 341  | 0.27             | fsDel        | NM_018315              | c.477_478del       | NA  | NA    | NA         | 87   | 6    | 5    | Deleterious             | LoF                  |    |
| MO-92  |      | <i>FBXW7</i>   | chr4:153268089  | ATT        | CTTT      | p.Lys239fs     | 31   | 87   | 0.36             | fsSub        | NM_018315              | c.776_781GAAAG     | NA  | NA    | NA         | 9    | 22   | 4    | NA                      | NA                   |    |
| MO-92  |      | <i>FBXW7</i>   | chr4:153251985  | CTTTTC     | CTTTC     | NA             | 56   | 87   | 0.36             | fsSub        | NM_018315              | c.1456_1457insTG   | NA  | NA    | NA         | 663  | 113  | 3    | Deleterious             | LoF                  |    |
| MO-92  |      | <i>FBXW7</i>   | chr4:153251985  | CTTTTC     | CTTC      | p.Tpp566fs     | 776  | 1986 | 0.39             | fsIns        | NM_018315              | c.776_781GAAAG     | NA  | NA    | NA         | 5    | 114  | 5    | NA                      | NA                   |    |
| MO-92  |      | <i>FBXW7</i>   | chr4:153273670  | ATTTTT     | ATTTT     | p.K70fs        | 119  | 138  | 0.68             | fsDel        | NM_018315              | c.208delA          | NA  | NA    | NA         | 5    | 114  | 5    | NA                      | NA                   |    |
| MO-92  |      | <i>FBXW7</i>   | chr4:153332921  | CTT        | CT        | p.K11fs        | 1527 | 1740 | 0.88             | fsDel        | NM_033632              | c.33delA           | NA  | NA    | NA         | 740  | 787  | 4    | NA                      | NA                   |    |
| MO-92  |      | <i>FBXW7</i>   | chr4:153273836  | TAAAG      | TAAG      | NA             | 692  | 692  | 1.00             | fsSub        | NM_018315              | c.43_47CTTA        | NA  | NA    | NA         | 301  | 391  | 3    | NA                      | NA                   |    |
| MO-92  |      | <i>FGFR1</i>   | chr8:38272306   | CTT        | CT        | p.K654fs       | 73   | 381  | 0.19             | fsDel        | NM_015850              | c.1960delA         | NA  | NA    | NA         | 18   | 55   | 5    | NA                      | NA                   |    |
| MO-92  |      | <i>FGFR1</i>   | chr8:38272306   | CTT        | C         | p.Lys687fs     | 230  | 381  | 0.60             | fsDel        | NM_015850              | c.1960_1961del     | NA  | NA    | NA         | 90   | 140  | 5    | NA                      | NA                   |    |
| MO-92  |      | <i>FGFR2</i>   | chr10:123247514 | CTT        | GTC       | NA             | 16   | 85   | 0.19             | nonfsSub     | NM_000141              | c.1975_1977GAC     | NA  | NA    | NA         | 0    | 16   | 1    | NA                      | NA                   |    |
| MO-92  |      | <i>FGFR2</i>   | chr10:123247514 | CTT        | CT        | p.K659fs       | 32   | 85   | 0.38             | fsDel        | NM_000141              | c.1975delA         | NA  | NA    | NA         | 2    | 30   | 5    | NA                      | NA                   |    |
| MO-92  |      | <i>FGFR2</i>   | chr10:123247514 | CTT        | C         | p.Lys659fs     | 36   | 85   | 0.42             | fsDel        | NM_000141              | c.1975_1976del     | NA  | NA    | NA         | 4    | 32   | 5    | NA                      | NA                   |    |
| MO-92  |      | <i>FGFR2</i>   | chr10:123279637 | AT         | A         | p.Asn265fs     | 491  | 491  | 1.00             | fsDel        | NM_000141              | c.794delA          | NA  | NA    | rs67982286 | 341  | 150  | 3    | NA                      | NA                   |    |
| MO-92  |      | <i>FLT3</i>    | chr13:28623588  | GT         | G         | p.Asn323fs     | 753  | 1397 | 0.54             | fsDel        |                        |                    |     |       |            |      |      |      |                         |                      |    |



| Sample | Pair | Gene   | Location       | Ref       | Alt      | AA Change    | FAO  | FDP  | Variant Fraction | Variant Type      | Transcript ID (RefSeq) | Nucleotide Change  | ESP | 1000G | db135 | FSAF | FSAR | HRUN | Onncomine Variant Class | Onncomine Gene Class |
|--------|------|--------|----------------|-----------|----------|--------------|------|------|------------------|-------------------|------------------------|--------------------|-----|-------|-------|------|------|------|-------------------------|----------------------|
| MO-92  |      | NF1    | chr17:29559740 | C         | CT       | p.Leu1114fs  | 297  | 834  | 0.36             | fsIns             | NM_000267              | c.3338dupT         | NA  | NA    | NA    | 62   | 235  | 4    | Deleterious             | LoF                  |
| MO-92  |      | NF1    | chr17:29665091 | CTTTGGG   | CTTGG    | NA           | 134  | 366  | 0.37             | fsDel             | NM_000267              | c.6690_6696CTTGG   | NA  | NA    | NA    | 4    | 130  | 3    | NA                      | NA                   |
| MO-92  |      | NF1    | chr17:29556228 | ACCCATG   | ACCCAT   | p.Gly868fs   | 828  | 1779 | 0.47             | fsDel             | NM_000267              | c.2601delG         | NA  | NA    | NA    | 54   | 774  | 3    | Deleterious             | LoF                  |
| MO-92  |      | NF1    | chr17:29592296 | AT        | A        | p.Phe1593fs  | 120  | 232  | 0.52             | fsDel             | NM_000267              | c.4712delT         | NA  | NA    | NA    | 33   | 87   | 4    | Deleterious             | LoF                  |
| MO-92  |      | NF1    | chr17:29665091 | CTTTGGG   | CTTTGGG  | NA           | 232  | 366  | 0.63             | fsSub             | NM_000267              | c.6690_6696CTTTGGG | NA  | NA    | NA    | 115  | 117  | 3    | NA                      | NA                   |
| MO-92  |      | NF1    | chr17:29661873 | CTTTG     | CTTG     | p.Cys1945fs  | 528  | 792  | 0.67             | fsDel             | NA                     | NA                 | NA  | NA    | NA    | NA   | NA   | NA   | Deleterious             | LoF                  |
| MO-92  |      | NF1    | chr17:29585516 | CA        | T        | p.Lys1444fs  | 70   | 86   | 0.81             | fsDel             | NM_000267              | c.426delA          | NA  | NA    | NA    | 66   | 4    | 3    | Deleterious             | LoF                  |
| MO-92  |      | NF1    | chr17:29677243 | T         | TA       | p.His2457fs  | 404  | 490  | 0.84             | fsIns             | NA                     | NA                 | NA  | NA    | NA    | NA   | NA   | NA   | Deleterious             | LoF                  |
| MO-92  |      | NF1    | chr17:29654592 | ATTTA     | ATTA     | p.Tyr1783fs  | 15   | 489  | 0.25             | fsDel             | NA                     | NA                 | NA  | NA    | NA    | NA   | NA   | NA   | Deleterious             | LoF                  |
| MO-92  |      | NF1    | chr17:29490374 | CT        | C        | p.Phe154fs   | 1617 | 1660 | 0.97             | fsDel             | NM_000267              | c.460delT          | NA  | NA    | NA    | 164  | 1453 | 3    | Deleterious             | LoF                  |
| MO-92  |      | NF1    | chr17:29654788 | CAA       | C        | p.Lys1848fs  | 353  | 361  | 0.98             | fsDel             | NM_000267              | c.5478_5479del     | NA  | NA    | NA    | 82   | 271  | 4    | Deleterious             | LoF                  |
| MO-92  |      | NF1    | chr17:29653286 | TTA       | TT       | p.Lys1756fs  | 670  | 673  | 1.00             | fsDel             | NA                     | NA                 | NA  | NA    | NA    | NA   | NA   | NA   | Deleterious             | LoF                  |
| MO-92  |      | NF1    | chr17:29528171 | CTTTA     | CTTA     | p.Phe394fs   | 1684 | 1690 | 1.00             | fsDel             | NA                     | NA                 | NA  | NA    | NA    | NA   | NA   | NA   | Deleterious             | LoF                  |
| MO-92  |      | NF1    | chr17:29550505 | CA        | C        | p.Met590fs   | 378  | 378  | 1.00             | fsDel             | NM_000267              | c.1766delA         | NA  | NA    | NA    | 10   | 368  | 3    | Deleterious             | LoF                  |
| MO-92  |      | NF1    | chr17:29685552 | AAATTTG   | AATTTG   | p.Asn2676fs  | 451  | 451  | 1.00             | fsDel             | NA                     | NA                 | NA  | NA    | NA    | NA   | NA   | NA   | Deleterious             | LoF                  |
| MO-92  |      | NF2    | chr22:30061002 | GAAA      | GAAAT    | NA           | 6    | 27   | 0.22             | nonfsSub          | NM_000268              | c.834_838GAAAT     | NA  | NA    | NA    | 6    | 0    | 4    | NA                      | NA                   |
| MO-92  |      | NF2    | chr22:30061002 | GAAAA     | GAA      | p.279_280del | 19   | 27   | 0.70             | fsDel             | NM_000268              | c.837_838del       | NA  | NA    | NA    | 15   | 4    | 4    | NA                      | NA                   |
| MO-92  |      | NF2    | chr22:30057245 | ATTT      | ATT      | p.Y244fs     | 595  | 671  | 0.89             | fsDel             | NM_000268              | c.730delT          | NA  | NA    | NA    | 111  | 484  | 3    | NA                      | NA                   |
| MO-92  |      | NF2    | chr22:30070828 | CA        | C        | p.Glu450fs   | 262  | 290  | 0.90             | fsDel             | NM_000268              | c.1345delA         | NA  | NA    | NA    | 16   | 246  | 3    | Deleterious             | LoF                  |
| MO-92  |      | NOTCH1 | chr9:139393376 | G         | GC       | p.Ala2052fs  | 180  | 1703 | 0.11             | fsIns             | NA                     | NA                 | NA  | NA    | NA    | NA   | NA   | NA   | Deleterious             | LoF                  |
| MO-92  |      | NOTCH1 | chr9:139391750 | GC        | C        | p.G2147fs    | 83   | 328  | 0.25             | fsDel             | NM_017617              | c.6440delG         | NA  | NA    | NA    | 10   | 73   | 3    | NA                      | NA                   |
| MO-92  |      | NOTCH1 | chr9:139400036 | G         | GC       | p.Arg1438fs  | 111  | 401  | 0.28             | fsIns             | NA                     | NA                 | NA  | NA    | NA    | NA   | NA   | NA   | Deleterious             | LoF                  |
| MO-92  |      | NOTCH1 | chr9:139412671 | AG        | A        | p.P391fs     | 134  | 196  | 0.68             | fsDel             | NM_017617              | c.1172delC         | NA  | NA    | NA    | 3    | 131  | 3    | NA                      | NA                   |
| MO-92  |      | NOTCH1 | chr9:139391021 | TAAGTT    | TAAGT    | p.N2389fs    | 250  | 271  | 0.92             | fsDel             | NM_017617              | c.7165delA         | NA  | NA    | NA    | 108  | 142  | 4    | NA                      | NA                   |
| MO-92  |      | PAX5   | chr9:37015121  | CTTT      | CTTG     | NA           | 53   | 171  | 0.31             | nonfsSub          | NM_016734              | c.280_283CAAG      | NA  | NA    | NA    | 52   | 1    | 3    | NA                      | NA                   |
| MO-92  |      | PAX5   | chr9:37015121  | CTTT      | CTT      | p.K94fs      | 87   | 171  | 0.51             | fsDel             | NM_016734              | c.280delA          | NA  | NA    | NA    | 59   | 28   | 3    | NA                      | NA                   |
| MO-92  |      | PIK3CA | chr3:178921496 | CCTTT     | CCTTGG   | NA           | 73   | 580  | 0.13             | nonfsSub          | NM_006218              | c.978_982CCTTG     | NA  | NA    | NA    | 72   | 1    | 3    | NA                      | NA                   |
| MO-92  |      | PIK3CA | chr3:178927481 | CTAAA     | ACTAA    | NA           | 6    | 43   | 0.14             | nonfsSub          | NM_006218              | c.1244_1248ACTAA   | NA  | NA    | NA    | 0    | 6    | 1    | NA                      | NA                   |
| MO-92  |      | PIK3CA | chr3:178938940 | CAA       | CAC      | NA           | 304  | 1727 | 0.18             | nonfsSub          | NM_006218              | c.2182_2184CAC     | NA  | NA    | NA    | 0    | 304  | 4    | NA                      | NA                   |
| MO-92  |      | PIK3CA | chr3:178927464 | TAAA      | TAAG     | NA           | 38   | 152  | 0.25             | nonfsSub          | NM_006218              | c.1227_1230TAAG    | NA  | NA    | NA    | 37   | 1    | 3    | NA                      | NA                   |
| MO-92  |      | PIK3CA | chr3:178927464 | TAAA      | TAA      | p.K410fs     | 113  | 152  | 0.74             | fsDel             | NM_006218              | c.1230delA         | NA  | NA    | NA    | 82   | 31   | 3    | NA                      | NA                   |
| MO-92  |      | PIK3CA | chr3:178927481 | CTAAA     | CTAA     | p.K416fs     | 35   | 43   | 0.81             | fsDel             | NM_006218              | c.1248delA         | NA  | NA    | NA    | 8    | 27   | 3    | NA                      | NA                   |
| MO-92  |      | PIK3CA | chr3:178938940 | CAA       | CA       | p.Q728fs     | 1422 | 1727 | 0.82             | fsDel             | NM_006218              | c.2184delA         | NA  | NA    | NA    | 694  | 728  | 4    | NA                      | NA                   |
| MO-92  |      | PIK3CA | chr3:178921496 | CTTTT     | CCCTT    | p.W328fs     | 507  | 580  | 0.87             | fsDel             | NM_006218              | c.982delT          | NA  | NA    | NA    | 507  | 0    | 3    | NA                      | NA                   |
| MO-92  |      | PIK3CA | chr3:178928123 | CTTT      | T        | p.Lys468fs   | 364  | 395  | 0.92             | fsDel             | NM_006218              | c.1402delA         | NA  | NA    | NA    | 280  | 84   | 3    | NA                      | NA                   |
| MO-92  |      | PIK3R1 | chr5:67591273  | CAAA      | CAAG     | NA           | 13   | 83   | 0.16             | nonfsSub          | NM_181504              | c.961_964CAAG      | NA  | NA    | NA    | 13   | 0    | 4    | NA                      | NA                   |
| MO-92  |      | PIK3R1 | chr5:67591273  | CAAA      | CA       | p.321_322del | 28   | 83   | 0.34             | fsDel             | NM_181504              | c.963_964del       | NA  | NA    | NA    | 20   | 8    | 4    | NA                      | NA                   |
| MO-92  |      | PIK3R1 | chr5:67591273  | CAAA      | CAA      | p.K322fs     | 42   | 83   | 0.51             | fsDel             | NM_181504              | c.964delA          | NA  | NA    | NA    | 24   | 18   | 4    | NA                      | NA                   |
| MO-92  |      | PIK3R1 | chr5:67522763  | CAAAG     | CAAG     | p.Lys88fs    | 198  | 247  | 0.80             | fsDel             | NM_181523              | c.260_264CAAG      | NA  | NA    | NA    | 34   | 164  | 3    | Deleterious             | LoF                  |
| MO-92  |      | PPARG  | chr3:12458367  | CAAAAAG   | CAAGCTT  | NA           | 17   | 199  | 0.09             | nonfsSub          | NM_005037              | c.900_905CAAGCT    | NA  | NA    | NA    | 0    | 17   | 4    | NA                      | NA                   |
| MO-92  |      | PPARG  | chr3:12458325  | GTTC      | GTTC     | p.R288fs     | 46   | 279  | 0.16             | fsDel             | NM_005037              | c.862delC          | NA  | NA    | NA    | 45   | 1    | 1    | NA                      | NA                   |
| MO-92  |      | PPARG  | chr3:12458325  | GTTC      | GTTC     | NA           | 83   | 279  | 0.30             | fsSub             | NM_005037              | c.858_862GTTC      | NA  | NA    | NA    | 83   | 0    | 3    | NA                      | NA                   |
| MO-92  |      | PPARG  | chr3:12458325  | GTTC      | TTTT     | NA           | 139  | 279  | 0.50             | nonfsSub          | NM_005037              | c.858_862TTTT      | NA  | NA    | NA    | 126  | 13   | 1    | NA                      | NA                   |
| MO-92  |      | PPARG  | chr3:12458367  | CAAAAAG   | CAAAAG   | p.Ser330fs   | 103  | 199  | 0.52             | fsDel             | NM_005037              | c.900_905CAAAAG    | NA  | NA    | NA    | 100  | 3    | 4    | NA                      | NA                   |
| MO-92  |      | PTCH1  | chr9:98224238  | ATTTT     | ATTTT    | p.Lys867fs   | 143  | 1922 | 0.07             | fsIns             | NA                     | NA                 | NA  | NA    | NA    | NA   | NA   | NA   | Deleterious             | LoF                  |
| MO-92  |      | PTCH1  | chr9:98279020  | C         | G        | p.R28P       | 38   | 289  | 0.13             | missense          | NM_001083603           | c.G83C             | NA  | NA    | NA    | 38   | 0    | 4    | NA                      | NA                   |
| MO-92  |      | PTCH1  | chr9:98239094  | GAA       | G        | p.Phe516fs   | 150  | 979  | 0.15             | fsIns             | NA                     | NA                 | NA  | NA    | NA    | NA   | NA   | NA   | Deleterious             | LoF                  |
| MO-92  |      | PTCH1  | chr9:98268814  | AGTTTAA   | AGTTA    | p.Lys89fs    | 851  | 967  | 0.88             | fsDel             | NA                     | NA                 | NA  | NA    | NA    | NA   | NA   | NA   | Deleterious             | LoF                  |
| MO-92  |      | PTCH1  | chr9:98242855  | CA        | C        | p.Leu254fs   | 366  | 375  | 0.98             | fsDel             | NM_000264              | c.761delT          | NA  | NA    | NA    | 3    | 363  | 3    | Deleterious             | LoF                  |
| MO-92  |      | PTCH1  | chr9:98242831  | CA        | C        | p.Leu262fs   | 375  | 376  | 1.00             | fsDel             | NM_000264              | c.785delT          | NA  | NA    | NA    | 113  | 262  | 3    | Deleterious             | LoF                  |
| MO-92  |      | PTCH1  | chr9:98229587  | TA        | T        | p.Phe790fs   | 56   | 56   | 1.00             | fsDel             | NM_000264              | c.2370delT         | NA  | NA    | NA    | 27   | 29   | 3    | Deleterious             | LoF                  |
| MO-92  |      | PTEN   | chr10:89685276 | G         | GGT      | p.Asp58fs    | 32   | 161  | 0.20             | fsIns             | NM_000314              | c.171_172insGT     | NA  | NA    | NA    | 32   | 0    | 2    | Deleterious             | LoF                  |
| MO-92  |      | PTEN   | chr10:89717675 | C         | CG       | p.Glu235fs   | 435  | 1758 | 0.25             | fsIns             | NA                     | NA                 | NA  | NA    | NA    | NA   | NA   | NA   | Deleterious             | LoF                  |
| MO-92  |      | PTEN   | chr10:89653784 | AT        | ATT      | p.I28fs      | 190  | 669  | 0.28             | fsIns             | NM_000314              | c.83dupT           | NA  | NA    | NA    | 190  | 0    | 3    | NA                      | NA                   |
| MO-92  |      | PTEN   | chr10:89692952 | AT        | A        | p.Leu146lle  | 47   | 118  | 0.40             | missense          | NM_000314              | c.T436A            | NA  | NA    | NA    | 47   | 0    | 5    | NA                      | NA                   |
| MO-92  |      | PTEN   | chr10:89653784 | AT        | A        | p.Tyr29fs    | 414  | 669  | 0.62             | fsDel             | NM_000314              | c.83delT           | NA  | NA    | NA    | 98   | 316  | 3    | Deleterious             | LoF                  |
| MO-92  |      | PTEN   | chr10:89720636 | TAAAG     | TAAG     | p.Asp331fs   | 78   | 88   | 0.89             | fsDel             | NM_000314              | c.987_991TAAAG     | NA  | NA    | NA    | 68   | 10   | 3    | Deleterious             | LoF                  |
| MO-92  |      | PTEN   | chr10:89693029 | CCAAATTTA | CCAAATTA | p.Lys80fs    | 590  | 590  | 1.00             | fsDel             | NA                     | NA                 | NA  | NA    | NA    | NA   | NA   | NA   | Deleterious             | LoF                  |
| MO-92  |      | RB1    | chr13:49030472 | GTTTTA    | GTTTA    | NA           | 21   | 136  | 0.15             | fsSub             | NM_000321              | c.1947_1952GTTTA   | NA  | NA    | NA    | 0    | 21   | 4    | NA                      | NA                   |
| MO-92  |      | RB1    | chr13:49030472 | GTTTTA    | GTTT     | p.651_651del | 23   | 136  | 0.17             | fsDel             | NM_000321              | c.1951_1952del     | NA  | NA    | NA    | 16   | 7    | 4    | NA                      | NA                   |
| MO-92  |      | RB1    | chr13:48934226 | TA        | T        | p.Lys228fs   | 183  | 838  | 0.22             | fsDel             | NM_000321              | c.682delA          | NA  | NA    | NA    | 156  | 27   | 3    | Deleterious             | LoF                  |
| MO-92  |      | RB1    | chr13:49054162 | GA        | G        | p.Met916fs   | 131  | 496  | 0.26             | fsDel             | NA                     | NA                 | NA  | NA    | NA    | NA   | NA   | NA   | Deleterious             | LoF                  |
| MO-92  |      | RB1    | chr13:48923106 | TA        | AT       | p.Ile185Asn  | 72   | 147  | 0.49             | missense:nonfsSub | NM_000321              | c.554_555AT        | NA  | NA    | NA    | 2    | 70   | 1    | NA                      | NA                   |
| MO-92  |      | RB1    | chr13:48916833 | GAA       | G        | p.Asn123fs   | 240  | 489  | 0.49             | fsDel             | NA                     | NA                 | NA  | NA    | NA    | NA   | NA   | NA   | Deleterious             | LoF                  |
| MO-92  |      | RB1    | chr13:48923106 | TA        | T        | p.Asn186fs   | 75   | 147  | 0.51             | fsDel             | NM_000321              | c.555delA          | NA  | NA    | NA    | 3    | 72   | 3    | Deleterious             | LoF                  |
| MO-92  |      | RB1    | chr13:49027136 | CTTTA     | CTTA     | p.Leu569fs   | 141  | 247  | 0.57             | fsDel             | NA                     | NA                 | NA  | NA    | NA    | NA   | NA   | NA   | Deleterious             | LoF                  |
| MO-92  |      | RB1    | chr13:49027160 | CA        | C        | p.Lys577fs   | 172  | 242  | 0.71             | fsDel             | NA                     | NA                 | NA  | NA    | NA    | NA   | NA   | NA   | Deleterious             | LoF                  |
| MO-92  |      | RB1    | chr13:48916779 | CT        | C        | p.Phe104fs   | 86   | 95   | 0.91             | fsDel             | NM_000321              | c.310delT          | NA  | NA    | NA    | 3    | 83   | 3    | Deleterious             | LoF                  |
| MO-92  |      | RB1    | chr13:48942686 | GAAA      | GA       | p.Ser360fs   | 88   | 90   | 0.98             | fsDel             | NM_000321              | c.1075_1076del     | NA  | NA    | NA    | 3    | 85   | 5    | Deleterious             | LoF                  |
| MO-92  |      | RB1    | chr13:49033856 | CT        | C        | p.Cys666fs   | 222  | 225  | 0.99             | fsDel             | NM_000321              | c.1994delT         | NA  | NA    | NA    | 145  | 77   | 3    | Deleterious             | LoF                  |
| MO-92  |      | SPOP   | chr17:47696435 | CTTTG     | CTTGG    | NA           | 29   | 162  | 0.18             | nonfsSub          | NM_003563              | c.384_388CAAG      | NA  | NA    | NA    | 28   | 1    | 3    | NA                      | NA                   |

| Sample | Pair | Gene   | Location        | Ref      | Alt      | AA Change    | FAO  | FDP  | Variant Fraction | Variant Type      | Transcript ID (RefSeq) | Nucleotide Change   | ESP      | 1000G  | db135       | FSAF | FSAR | HRUN | Onncomine Variant Class | Onncomine Gene Class |
|--------|------|--------|-----------------|----------|----------|--------------|------|------|------------------|-------------------|------------------------|---------------------|----------|--------|-------------|------|------|------|-------------------------|----------------------|
| MO-92  |      | TP53   | chr17:7576546   | GT       | G        | p.N344fs     | 202  | 235  | 0.86             | fsDel             | NM_001126113           | c.1031delA          | NA       | NA     | NA          | 73   | 129  | 3    | NA                      | NA                   |
| MO-92  |      | TSC1   | chr9:135779155  | TA       | T        | p.Leu697fs   | 74   | 518  | 0.14             | fsDel             | NM_000368              | c.2090delT          | NA       | NA     | NA          | 19   | 55   | 4    | Deleterious             | LoF                  |
| MO-92  |      | TSC1   | chr9:135772901  | GTTTTTGG | GTTTTTGG | NA           | 43   | 99   | 0.43             | nonfsSub          | NM_000368              | c.2715_2722CACCAAAC | NA       | NA     | NA          | 43   | 0    | 5    | NA                      | NA                   |
| MO-92  |      | TSC1   | chr9:135772901  | GTTTTTGG | GTTTTTGG | NA           | 49   | 99   | 0.49             | nonfsSub          | NM_000368              | c.2715_2722CAAAAC   | NA       | NA     | NA          | 34   | 15   | 5    | NA                      | NA                   |
| MO-92  |      | TSC1   | chr9:135776976  | CT       | C        | p.Lys834fs   | 130  | 136  | 0.96             | fsDel             | NA                     | NA                  | NA       | NA     | NA          | NA   | NA   | NA   | Deleterious             | LoF                  |
| MO-92  |      | TSC1   | chr9:135787740  | AT       | A        | p.Ile281fs   | 372  | 373  | 1.00             | fsDel             | NM_000368              | c.841delA           | NA       | NA     | NA          | 149  | 223  | 3    | Deleterious             | LoF                  |
| MO-92  |      | TSC2   | chr16:2107134   | TG       | TGG      | p.His270fs   | 56   | 346  | 0.16             | fsIns             | NA                     | NA                  | NA       | NA     | NA          | NA   | NA   | NA   | Deleterious             | LoF                  |
| MO-92  |      | A      | chr16:2114354   | A        | AC       | p.Gln510fs   | 69   | 369  | 0.19             | fsIns             | NM_000548              | c.152dupC           | NA       | NA     | NA          | 6    | 63   | 3    | Deleterious             | LoF                  |
| MO-92  |      | VHL    | chr3:10191582   | G        | G        | p.Asp197fs   | 216  | 217  | 1.00             | fsDel             | NM_000551              | c.586delA           | NA       | NA     | NA          | 86   | 130  | 3    | Deleterious             | LoF                  |
| MO-92  |      | VHL    | chr3:10191582   | CA       | A        | p.Asn193fs   | 163  | 163  | 1.00             | fsDel             | NM_000551              | c.578delA           | NA       | NA     | NA          | 147  | 16   | 3    | Deleterious             | LoF                  |
| MO-92  |      | WT1    | chr11:32410621  | GT       | G        | p.Lys512fs   | 785  | 1019 | 0.77             | fsDel             | NM_000378              | c.1476delA          | NA       | NA     | NA          | 513  | 272  | 3    | Deleterious             | LoF                  |
| MO-93  |      | APC    | chr5:112103053  | A        | G        | p.Ser130Gly  | 1040 | 1660 | 0.63             | missense          | NM_000038              | c.A388G             | 0.000154 | NA     | rs150973053 | 492  | 548  | 3    | NA                      | NA                   |
| MO-93  |      | ATM    | chr11:108196896 | C        | T        | p.Leu2307Phe | 1420 | 1996 | 0.71             | missense          | NM_000051              | c.C6919T            | 0.001946 | NA     | rs56009889  | 687  | 733  | 1    | NA                      | NA                   |
| MO-93  |      | ATM    | chr11:108098608 | GT       | G        | p.V60fs      | 357  | 366  | 0.98             | fsDel             | NM_000051              | c.179delT           | NA       | NA     | NA          | 6    | 351  | 5    | NA                      | NA                   |
| MO-93  |      | KRAS   | chr12:25398285  | C        | A        | p.Gly12Cys   | 812  | 1911 | 0.42             | missense          | NM_004985              | c.G34T              | NA       | NA     | rs121913530 | 443  | 369  | 2    | Hotspot                 | GoF                  |
| MO-93  |      | STK11  | chr19:1219321   | A        | T        | NA           | 239  | 651  | 0.3671           | splice            | NM_000455              | exon3:c.375-2a>T    | NA       | NA     | NA          | 41   | 198  | 1    | NA                      | NA                   |
| MO-95  |      | APC    | chr5:112175211  | T        | A        | p.Ile1307Lys | 644  | 1997 | 0.32             | missense          | NM_000038              | c.T3920A            | 0.001077 | NA     | rs137854579 | 318  | 326  | 1    | NA                      | NA                   |
| MO-95  |      | BRAF   | chr7:140481411  | C        | A        | p.Gly466Val  | 583  | 1996 | 0.29             | missense          | NM_004333              | c.G1397T            | NA       | NA     | rs121913351 | 316  | 267  | 2    | Hotspot                 | GoF                  |
| MO-95  |      | KRAS   | chr12:25398284  | C        | A        | p.Gly12Val   | 618  | 1757 | 0.35             | missense          | NM_004985              | c.G35T              | NA       | NA     | rs121913529 | 325  | 293  | 2    | Hotspot                 | GoF                  |
| MO-96  |      | APC    | chr5:112175756  | T        | TTA      | p.His1490fs  | 149  | 1966 | 0.08             | fsIns             | NM_000038              | c.4465_4466insTA    | NA       | NA     | NA          | 87   | 62   | 2    | Deleterious             | LoF                  |
| MO-96  |      | ERBB4  | chr2:212812159  | C        | A        | p.Leu139Phe  | 125  | 773  | 0.16             | missense          | NM_005235              | c.G417T             | NA       | NA     | NA          | 65   | 60   | 1    | NA                      | NA                   |
| MO-96  |      | KRAS   | chr12:25398284  | C        | A        | p.Gly12Val   | 476  | 1940 | 0.25             | missense          | NM_004985              | c.G35T              | NA       | NA     | rs121913529 | 333  | 243  | 2    | Hotspot                 | GoF                  |
| MO-96  |      | PIK3CA | chr3:178952085  | A        | G        | p.His1047Arg | 595  | 1999 | 0.30             | missense          | NM_006218              | c.A3140G            | NA       | NA     | rs121913279 | 235  | 270  | 1    | Hotspot                 | GoF                  |
| MO-96  |      | SMO    | chr7:128846063  | G        | T        | p.Trp331Cys  | 113  | 1998 | 0.06             | missense          | NM_005631              | c.G993T             | NA       | NA     | NA          | 107  | 6    | 2    | NA                      | NA                   |
| MO-96  |      | TP53   | chr17:7578535   | T        | C        | p.Lys132Arg  | 264  | 1121 | 0.24             | missense          | NM_000546              | c.A395G             | NA       | NA     | NA          | 110  | 154  | 2    | Hotspot                 | LoF                  |
| MO-97  |      | BRAF   | chr7:140453136  | A        | T        | p.Val600Glu  | 1320 | 2000 | 0.66             | missense          | NM_004333              | c.T1799A            | NA       | NA     | rs113488022 | 635  | 685  | 1    | Hotspot                 | GoF                  |
| MO-97  |      | TET2   | chr4:106158560  | A        | G        | p.N1154S     | 731  | 1561 | 0.47             | missense          | NM_0017628             | c.A3461G            | 0.000155 | NA     | NA          | 408  | 323  | 3    | NA                      | NA                   |
| MO-98  |      | BAP1   | chr3:52437465   | CA       | A        | p.Glu566Ter  | 253  | 286  | 0.88             | nonsense          | NM_004656              | c.1695dupT          | NA       | NA     | NA          | 127  | 126  | 1    | Deleterious             | LoF                  |
| MO-98  |      | BRAF   | chr7:140453136  | C        | T        | p.Val600Glu  | 1027 | 1997 | 0.51             | missense          | NM_004333              | c.T1799A            | NA       | NA     | rs113488022 | 495  | 532  | 1    | Hotspot                 | GoF                  |
| MO-98  |      | BRCA1  | chr17:41244252  | G        | A        | p.Pro1099Leu | 854  | 1817 | 0.47             | missense          | NM_007294              | c.C3296T            | 0.000308 | NA     | rs80357201  | 382  | 472  | 2    | NA                      | NA                   |
| MO-98  |      | MYO18A | chr17:27425935  | C        | G        | p.Gly1230Ala | 718  | 1384 | 0.52             | missense          | NM_078471              | c.G3689C            | 0.000082 | NA     | NA          | 347  | 371  | 4    | NA                      | NA                   |
| MO-99  |      | BRCA1  | chr17:41245846  | G        | A        | p.Pro568Ser  | 608  | 1999 | 0.30             | missense          | NM_007294              | c.C1702T            | NA       | NA     | NA          | 262  | 346  | 2    | NA                      | NA                   |
| MO-99  |      | ERBB2  | chr17:37871547  | A        | A        | p.Ala386Asp  | 787  | 1599 | 0.49             | missense          | NM_004448              | c.C1157A            | 0.004229 | 0.0018 | rs141116145 | 487  | 300  | 2    | NA                      | NA                   |
| MO-99  |      | ERBB4  | chr2:212566827  | T        | T        | p.Glu452Lys  | 872  | 1998 | 0.44             | missense          | NM_005235              | c.C1354A            | NA       | NA     | NA          | 449  | 423  | 2    | Hotspot                 | GoF                  |
| MO-99  |      | MYC    | chr8:128750512  | C        | T        | p.Pro175Ser  | 530  | 1978 | 0.27             | missense          | NM_002467              | c.C49T              | NA       | NA     | NA          | 261  | 269  | 4    | NA                      | NA                   |
| MO-99  |      | NRAS   | chr1:115256529  | T        | A        | p.Gln61Leu   | 668  | 1999 | 0.33             | missense          | NM_002524              | c.A182T             | NA       | NA     | rs11554290  | 380  | 288  | 2    | Hotspot                 | GoF                  |
| MO-99  |      | TET2   | chr4:106158562  | C        | C        | p.Ser588Leu  | 395  | 2000 | 0.20             | missense          | NM_017628              | c.C1763T            | NA       | NA     | NA          | 252  | 143  | 1    | NA                      | NA                   |
| MO-99  |      | TSC2   | chr16:2134328   | C        | T        | p.Arg1369Trp | 485  | 960  | 0.51             | missense          | NM_000548              | c.C4105T            | 0.000231 | NA     | rs45517328  | 230  | 255  | 2    | NA                      | NA                   |
| MO-100 |      | ALK    | chr2:29443679   | C        | G        | p.Val1180Leu | 330  | 1998 | 0.17             | missense          | NM_004304              | c.G3538C            | NA       | NA     | NA          | 147  | 183  | 1    | NA                      | NA                   |
| MO-100 |      | CDKN2A | chr9:21971184   | T        | G        | p.S73R       | 427  | 855  | 0.50             | missense          | NM_058195              | c.A217C             | 0.002047 | NA     | NA          | 221  | 206  | 1    | NA                      | NA                   |
| MO-100 |      | CTNNB1 | chr3:41266087   | G        | T        | p.Gln28His   | 669  | 1340 | 0.50             | missense          | NM_001904              | c.G84T              | NA       | NA     | NA          | 284  | 385  | 1    | Hotspot                 | GoF                  |
| MO-100 |      | NF2    | chr22:30000094  | A        | G        | p.Asn36Ser   | 986  | 2000 | 0.49             | missense          | NM_000268              | c.A107G             | NA       | NA     | NA          | 514  | 472  | 2    | NA                      | NA                   |
| MO-101 |      | APC    | chr5:112173987  | CCT      | C        | p.Gln901fs   | 508  | 1915 | 0.27             | fsDel             | NM_000038              | c.2697_2698del      | NA       | NA     | NA          | 224  | 282  | 2    | Deleterious             | LoF                  |
| MO-101 |      | APC    | chr5:112175776  | T        | G        | p.Ser1495Arg | 610  | 1903 | 0.32             | missense          | NM_000038              | c.T4485G            | NA       | NA     | NA          | 241  | 369  | 1    | NA                      | NA                   |
| MO-101 |      | BRCA1  | chr17:41243948  | C        | G        | p.Gln1200His | 834  | 1661 | 0.50             | missense          | NM_007294              | c.G3600C            | 0.000923 | 0.0009 | rs56214134  | 376  | 458  | 3    | NA                      | NA                   |
| MO-101 |      | BRCA2  | chr13:32911418  | TC       | AT       | p.Ser976Leu  | 398  | 895  | 0.44             | missense;nonfsSub | NM_000059              | c.2926_2927AT       | NA       | NA     | NA          | 140  | 258  | 1    | NA                      | NA                   |
| MO-101 |      | KRAS   | chr12:25398284  | G        | T        | p.Gly12Asp   | 956  | 1963 | 0.49             | missense          | NM_004985              | c.G35A              | NA       | NA     | rs121913529 | 408  | 548  | 2    | Hotspot                 | GoF                  |
| MO-102 |      | ATM    | chr11:108099989 | G        | C        | p.Arg90Ser   | 331  | 1312 | 0.25             | missense          | NM_000051              | c.G270C             | NA       | NA     | NA          | 174  | 160  | 2    | NA                      | NA                   |
| MO-103 |      | APC    | chr5:112175951  | G        | GA       | p.Thr1556fs  | 470  | 1750 | 0.27             | fsIns             | NM_000038              | c.4661dupA          | NA       | NA     | NA          | 281  | 186  | 6    | Deleterious             | LoF                  |
| MO-103 |      | APC    | chr5:112173917  | T        | C        | p.Arg876Ter  | 291  | 942  | 0.31             | nonsense          | NM_000038              | c.C2626T            | NA       | NA     | NA          | 181  | 160  | 1    | Deleterious             | LoF                  |
| MO-103 |      | FBXW7  | chr4:153332898  | C        | T        | p.Arg20Gly   | 978  | 1997 | 0.49             | missense          | NM_033632              | c.A58G              | 0.000615 | 0.0023 | rs115679616 | 517  | 451  | 1    | NA                      | NA                   |
| MO-103 |      | NRAS   | chr1:115258747  | C        | T        | p.Gly12Asp   | 352  | 1078 | 0.33             | missense          | NM_002524              | c.G35A              | 0.000077 | NA     | rs121913237 | 218  | 134  | 2    | Hotspot                 | GoF                  |
| MO-103 |      | RAF1   | chr3:12645694   | A        | G        | p.Ser259Pro  | 549  | 1196 | 0.46             | missense          | NM_002880              | c.T775C             | NA       | NA     | NA          | 275  | 274  | 1    | NA                      | NA                   |
| MO-103 |      | TP53   | chr17:7577568   | C        | T        | p.Cys238Tyr  | 34   | 547  | 0.06             | missense          | NM_000546              | c.G713A             | NA       | NA     | NA          | 34   | 16   | 1    | Hotspot                 | LoF                  |
| MO-104 |      | KRAS   | chr12:253980277 | GA       | TT       | p.Gln61Lys   | 1278 | 1538 | 0.83             | nonfsSub          | NM_004985              | c.180_181AA         | NA       | NA     | NA          | 669  | 609  | 1    | Hotspot                 | GoF                  |
| MO-104 |      | TP53   | chr17:75787403  | C        | A        | p.Cys176Phe  | 379  | 583  | 0.65             | missense          | NM_000546              | c.G527T             | NA       | NA     | NA          | 196  | 183  | 1    | Hotspot                 | LoF                  |
| MO-105 |      | BRAF   | chr7:140453136  | A        | T        | p.V60E       | 301  | 950  | 0.32             | missense          | NM_004333              | c.T1799A            | NA       | NA     | rs113488022 | 301  | 0    | 1    | Hotspot                 | GoF                  |
| MO-105 |      | CDKN2A | chr9:21974679   | G        | A        | p.Q50X       | 808  | 2000 | 0.40             | nonsense          | NM_000077              | c.C148T             | NA       | NA     | NA          | 346  | 412  | 2    | NA                      | NA                   |
| MO-105 |      | TSC1   | chr9:135804257  | G        | T        | p.M1I        | 657  | 1792 | 0.37             | missense          | NM_000368              | c.G3A               | NA       | NA     | NA          | 343  | 314  | 2    | NA                      | NA                   |
| MO-106 |      | TP53   | chr17:7577121   | A        | A        | p.Arg273Cys  | 200  | 1826 | 0.11             | missense          | NM_000546              | c.C817T             | NA       | NA     | rs121913343 | 91   | 109  | 1    | Hotspot                 | LoF                  |
| LU-1   |      | PITCH1 | chr9:98268829   | C        | T        | p.R85K       | 1008 | 1998 | 0.50             | missense          | NM_000264              | c.G2                |          |        |             |      |      |      |                         |                      |

| Sample | Pair | Gene   | Location        | Ref              | Alt  | AA Change          | FAO  | FDP  | Variant Fraction | Variant Type | Transcript ID (RefSeq) | Nucleotide Change  | ESP      | 1000G  | db135       | FSAF | FSAR | HRUN | Onncomine Variant Class | Onncomine Gene Class |
|--------|------|--------|-----------------|------------------|------|--------------------|------|------|------------------|--------------|------------------------|--------------------|----------|--------|-------------|------|------|------|-------------------------|----------------------|
| LU-25  | 6    | ATM    | chr11:108115629 | TC               | T    | p.Thr261fs         | 582  | 1488 | 0.39             | fsDel        | NM_000051              | c.778delC          | NA       | NA     | NA          | 285  | 297  | 3    | Deleterious             | LoF                  |
| LU-25  | 6    | CTNNB1 | chr3:41266137   | C                | G    | p.Ser45Cys         | 716  | 1992 | 0.36             | missense     | NM_001904              | c.C134G            | NA       | NA     | rs121913409 | 341  | 375  | 1    | Hotspot                 | GoF                  |
| LU-25  | 6    | EGFR   | chr7:55242464   | AGGAATTAAGAGAAGC | C    | p.Glu746_Ala750del | 1166 | 1974 | 0.59             | nonfsDel     | NM_005228              | c.2235_2249del     | NA       | NA     | rs121913421 | 630  | 516  | 2    | Hotspot                 | GoF                  |
| LU-25  | 6    | NOTCH1 | chr9:139399348  | C                | T    | p.Val1599Met       | 1131 | 1814 | 0.62             | missense     | NM_017617              | c.G4795A           | NA       | NA     | NA          | 530  | 601  | 1    | NA                      | NA                   |
| LU-25  | 6    | PTEN   | chr10:89692920  | T                | T    | p.Ile135Lys        | 748  | 1103 | 0.68             | missense     | NM_000314              | c.T404A            | NA       | NA     | NA          | 304  | 444  | 1    | Hotspot                 | LoF                  |
| LU-26  | 6    | ATM    | chr11:108206595 | TC               | G    | p.Asp2725Glu       | 537  | 1999 | 0.27             | missense     | NM_000051              | c.T8175G           | NA       | NA     | NA          | 253  | 284  | 1    | Hotspot                 | LoF                  |
| LU-26  | 6    | ATM    | chr11:108115629 | TC               | T    | p.Thr261fs         | 582  | 1971 | 0.30             | fsDel        | NM_000051              | c.778delC          | NA       | NA     | NA          | 273  | 315  | 3    | Deleterious             | LoF                  |
| LU-26  | 6    | EGFR   | chr7:55242464   | AGGAATTAAGAGAAGC | A    | p.Glu746_Ala750del | 1592 | 1983 | 0.80             | nonfsDel     | NM_005228              | c.2235_2249del     | NA       | NA     | rs121913421 | 988  | 604  | 2    | Hotspot                 | GoF                  |
| LU-26  | 6    | FOXR1  | chr8:38271783   | C                | T    | p.Tpr722Ter        | 10   | 188  | 0.05             | nonsense     | NM_015850              | c.G2907A           | NA       | NA     | NA          | 5    | 5    | 3    | NA                      | NA                   |
| LU-26  | 6    | FOXR1  | chr4:1806146    | C                | A    | p.Val389Met        | 6    | 74   | 0.08             | missense     | NM_000142              | c.G1165A           | NA       | NA     | NA          | 2    | 4    | 2    | NA                      | NA                   |
| LU-26  | 6    | NOTCH1 | chr9:139399348  | C                | T    | p.Val1599Met       | 77   | 125  | 0.62             | missense     | NM_017617              | c.G4795A           | NA       | NA     | NA          | 39   | 38   | 1    | NA                      | NA                   |
| LU-27  |      | NF1    | chr7:29663934   | T                | C    | NA                 | 445  | 2000 | 0.2225           | splice       | NM_000267              | exon41:c.6364-2T>C | NA       | NA     | NA          | 211  | 234  | 1    | NA                      | NA                   |
| LU-27  |      | NFE2L2 | chr2:178098945  | G                | C    | p.Arg34Gly         | 424  | 1860 | 0.23             | missense     | NM_006164              | c.C100G            | NA       | NA     | NA          | 207  | 217  | 1    | Hotspot                 | GoF                  |
| LU-27  |      | TP53   | chr17:7578176   | C                | T    | NA                 | 518  | 1981 | 0.2615           | splice       | NM_000546              | exon7:c.672-1G>A   | NA       | NA     | NA          | 231  | 287  | 2    | NA                      | NA                   |
| LU-27  |      | WT1    | chr11:32456395  | A                | T    | p.Gly166Val        | 170  | 1191 | 0.14             | missense     | NM_000378              | c.G497T            | NA       | NA     | NA          | 86   | 84   | 2    | NA                      | NA                   |
| LU-29  |      | CTNNB1 | chr3:41266097   | G                | T    | p.D32Y             | 497  | 2000 | 0.25             | missense     | NM_001904              | c.G94T             | NA       | NA     | rs28931588  | 166  | 331  | 2    | NA                      | NA                   |
| LU-29  |      | EGFR   | chr7:55241678   | A                | C    | p.E709A            | 323  | 1224 | 0.26             | missense     | NM_005228              | c.A2126C           | NA       | NA     | NA          | 179  | 144  | 3    | NA                      | NA                   |
| LU-29  |      | EGFR   | chr7:55241708   | G                | C    | p.G719A            | 319  | 1209 | 0.26             | missense     | NM_005228              | c.C2156G           | NA       | NA     | rs121913428 | 173  | 146  | 3    | NA                      | NA                   |
| LU-29  |      | ERBB4  | chr2:212495294  | T                | A    | p.L658F            | 1001 | 1993 | 0.50             | missense     | NM_005235              | c.A1972T           | NA       | 0.0009 | rs190654033 | 496  | 505  | 2    | NA                      | NA                   |
| LU-30  |      | FBXW7  | chr4:153332496  | C                | T    | p.Val154Ile        | 230  | 1069 | 0.22             | missense     | NM_033632              | c.G460A            | 0.000231 | 0.0005 | rs138477494 | 123  | 107  | 1    | NA                      | NA                   |
| LU-30  |      | MSH2   | chr2:47698172   | T                | C    | p.Ile577Thr        | 189  | 610  | 0.31             | missense     | NM_000251              | c.T1790C           | 0.000231 | NA     | rs149796110 | 90   | 99   | 2    | NA                      | NA                   |
| LU-31  |      | NF1    | chr17:29657409  | G                | G    | p.Ala1902Gly       | 1376 | 1999 | 0.69             | missense     | NM_000267              | c.C5642G           | NA       | NA     | NA          | 673  | 703  | 2    | NA                      | NA                   |
| LU-31  |      | RB1    | chr13:49039503  | A                | T    | p.Arg830Ter        | 1258 | 1674 | 0.75             | nonsense     | NM_000321              | c.A2488T           | NA       | NA     | NA          | 667  | 591  | 2    | Deleterious             | LoF                  |
| LU-31  |      | TP53   | chr17:75777099  | A                | A    | p.Arg280Ile        | 635  | 806  | 0.79             | missense     | NM_000546              | c.G839T            | NA       | NA     | NA          | 345  | 290  | 1    | Hotspot                 | LoF                  |
| LU-32  |      | ATM    | chr11:108236203 | C                | T    | p.Arg3047Ter       | 442  | 2000 | 0.22             | nonsense     | NM_000051              | c.C9139T           | NA       | NA     | rs121434219 | 172  | 270  | 2    | Deleterious             | LoF                  |
| LU-32  |      | ATM    | chr11:108172517 | G                | A    | NA                 | 380  | 2000 | 0.19             | splice       | NM_000051              | exon35:c.5319-1G>A | NA       | NA     | NA          | 213  | 167  | 2    | NA                      | NA                   |
| LU-32  |      | KRAS   | chr12:25398284  | C                | G    | p.Gly12Ala         | 408  | 1998 | 0.20             | missense     | NM_004985              | c.G35C             | NA       | NA     | rs121913529 | 159  | 249  | 2    | Hotspot                 | GoF                  |
| LU-33  |      | BRCA1  | chr17:41243512  | C                | T    | p.Glu1346Lys       | 1273 | 1996 | 0.64             | missense     | NM_007294              | c.G4036A           | 0.000077 | NA     | rs80357407  | 612  | 661  | 1    | NA                      | NA                   |
| LU-33  |      | MET    | chr7:116371755  | C                | C    | p.Arg412Cys        | 211  | 1999 | 0.11             | missense     | NM_000245              | c.C1234T           | NA       | NA     | NA          | 101  | 110  | 1    | NA                      | NA                   |
| LU-33  |      | MET    | chr7:116339544  | G                | A    | p.Val136Ile        | 983  | 1999 | 0.49             | missense     | NM_000245              | c.G406A            | 0.000161 | 0.0009 | NA          | 549  | 434  | 1    | NA                      | NA                   |
| LU-33  |      | NF1    | chr17:29483031  | C                | CA   | p.His31fs          | 507  | 1992 | 0.25             | fsIns        | NM_000267              | c.92dupA           | NA       | NA     | NA          | 259  | 248  | 1    | Deleterious             | LoF                  |
| LU-33  |      | TP53   | chr17:7578542   | G                | C    | p.Leu130Val        | 465  | 1562 | 0.30             | missense     | NM_000546              | c.C388G            | NA       | NA     | NA          | 213  | 252  | 3    | Hotspot                 | LoF                  |
| LU-35  |      | APC    | chr5:112175006  | A                | G    | p.Arg1239Ter       | 296  | 1156 | 0.26             | nonsense     | NM_000038              | c.A3715T           | NA       | NA     | NA          | 151  | 145  | 1    | Deleterious             | LoF                  |
| LU-35  |      | BRCA2  | chr13:32900723  | C                | A    | p.Pro202Thr        | 552  | 1993 | 0.28             | missense     | NM_000059              | c.C604A            | NA       | NA     | NA          | 305  | 247  | 3    | NA                      | NA                   |
| LU-35  |      | KRAS   | chr12:25398284  | C                | C    | p.Gly12Asp         | 460  | 1996 | 0.23             | missense     | NM_004985              | c.G35A             | NA       | NA     | rs121913529 | 120  | 340  | 2    | Hotspot                 | GoF                  |
| LU-37  |      | NFE2L2 | chr2:178098810  | G                | G    | p.Glu79Gln         | 105  | 1097 | 0.10             | missense     | NM_006164              | c.G235C            | NA       | NA     | NA          | 56   | 49   | 1    | Hotspot                 | GoF                  |
| LU-37  |      | TP53   | chr17:7578243   | AC               | A    | p.Arg202fs         | 181  | 1990 | 0.09             | fsDel        | NM_000546              | c.605delG          | NA       | NA     | NA          | 112  | 69   | 1    | Deleterious             | LoF                  |
| LU-38  |      | BRCA2  | chr13:32937488  | G                | T    | p.Ala271Ser        | 644  | 1353 | 0.48             | missense     | NM_000059              | c.G8149T           | 0.001461 | 0.0009 | rs28897747  | 396  | 248  | 2    | NA                      | NA                   |
| LU-38  |      | BTX    | chrX:100611164  | G                | T    | p.Cys481Tyr        | 180  | 1574 | 0.11             | missense     | NM_000061              | c.G1442A           | NA       | NA     | NA          | 94   | 86   | 1    | Hotspot                 | GoF                  |
| LU-38  |      | NOTCH1 | chr9:139400299  | C                | A    | p.Arg1350Leu       | 259  | 558  | 0.46             | missense     | NM_017617              | c.G4049T           | 0.000374 | 0.0009 | rs150343794 | 139  | 120  | 1    | NA                      | NA                   |
| LU-38  |      | TP53   | chr17:7577539   | G                | A    | p.Arg248Ter        | 109  | 1988 | 0.05             | missense     | NM_000546              | c.C742T            | NA       | NA     | rs121912651 | 53   | 56   | 2    | Hotspot                 | LoF                  |
| LU-39  |      | FBXW7  | chr4:153258991  | T                | A    | p.Q195L            | 1310 | 1856 | 0.71             | missense     | NM_018315              | c.A584T            | NA       | NA     | NA          | 698  | 612  | 1    | NA                      | NA                   |
| LU-39  |      | KIT    | chr4:55599332   | G                | T    | p.Asp820Tyr        | 1299 | 1999 | 0.65             | missense     | NM_000222              | c.G2458T           | NA       | NA     | NA          | 710  | 589  | 1    | Hotspot                 | GoF                  |
| LU-39  |      | PTEN   | chr10:89711900  | G                | C    | p.Arg173Pro        | 1030 | 1410 | 0.73             | missense     | NM_000314              | c.G518C            | NA       | NA     | NA          | 542  | 488  | 1    | Hotspot                 | LoF                  |
| LU-39  |      | TP53   | chr17:7578457   | A                | A    | p.Arg158Leu        | 1613 | 1906 | 0.85             | missense     | NM_000546              | c.G473T            | NA       | NA     | NA          | 636  | 977  | 1    | Hotspot                 | LoF                  |
| LU-40  |      | ATM    | chr11:108205709 | G                | A    | p.Gly267Glu        | 133  | 602  | 0.22             | missense     | NM_000051              | c.G8024A           | NA       | NA     | NA          | 65   | 68   | 2    | NA                      | NA                   |
| LU-40  |      | BIRC2  | chr11:102220995 | A                | G    | p.His88Arg         | 838  | 1996 | 0.42             | missense     | NM_001166              | c.A410G            | 0.000538 | 0.0005 | rs114363568 | 477  | 361  | 1    | NA                      | NA                   |
| LU-40  |      | JAK1   | chr1:65312368   | C                | T    | p.Val651Met        | 968  | 1991 | 0.49             | missense     | NM_000227              | c.G1951A           | 0.001637 | 0.0014 | rs149968614 | 428  | 540  | 1    | NA                      | NA                   |
| LU-40  |      | TSC2   | chr16:2129652   | C                | T    | p.Arg1127Trp       | 363  | 892  | 0.41             | missense     | NM_000546              | c.C3379T           | NA       | NA     | NA          | 196  | 167  | 1    | NA                      | NA                   |
| LU-41  |      | BRCA2  | chr13:32913126  | T                | C    | p.Leu1545Pro       | 235  | 1170 | 0.20             | missense     | NM_000059              | c.T4634C           | NA       | NA     | NA          | 87   | 148  | 5    | NA                      | NA                   |
| LU-41  |      | CDKN2A | chr9:21974640   | C                | G    | p.G63R             | 706  | 1609 | 0.44             | missense     | NM_058197              | c.G187C            | 0.002922 | 0.0027 | rs45456595  | 303  | 403  | 3    | NA                      | NA                   |
| LU-41  |      | KRAS   | chr12:25398285  | C                | A    | p.Gly12Cys         | 350  | 1123 | 0.31             | missense     | NM_004985              | c.G34T             | NA       | NA     | rs121913530 | 158  | 192  | 2    | Hotspot                 | GoF                  |
| LU-41  |      | TET2   | chr4:106157839  | C                | G    | p.Leu914Val        | 343  | 1995 | 0.17             | missense     | NM_017628              | c.C2740G           | NA       | NA     | NA          | 202  | 141  | 1    | NA                      | NA                   |
| LU-42  |      | CCNE1  | chr19:30312629  | G                | C    | p.Glu204Gln        | 135  | 1989 | 0.07             | missense     | NM_001238              | c.G610C            | NA       | NA     | NA          | 80   | 55   | 2    | NA                      | NA                   |
| LU-42  |      | FBXW7  | chr4:153249510  | C                | A    | p.Gly423Val        | 1301 | 1998 | 0.65             | missense     | NM_018315              | c.G1028T           | NA       | NA     | NA          | 708  | 593  | 2    | Hotspot                 | LoF                  |
| LU-42  |      | NOTCH1 | chr9:139418367  | T                | A    | p.Lys69Ter         | 629  | 945  | 0.67             | nonsense     | NM_017617              | c.A205T            | NA       | NA     | NA          | 348  | 281  | 2    | Deleterious             | LoF                  |
| LU-42  |      | TP53   | chr17:7578508   | C                | T    | p.Cys141Tyr        | 986  | 1432 | 0.69             | missense     | NM_000546              | c.G422A            | NA       | NA     | NA          | 420  | 566  | 1    | Hotspot                 | LoF                  |
| LU-45  |      | BRAF   | chr7:140453137  | C                | CTGT | p.Thr599dup        | 449  | 1767 | 0.25             | nonfsIns     | NM_004333              | c.1797_1798insACA  | NA       | NA     | NA          | 191  | 258  | 1    | Hotspot                 | GoF                  |
| LU-45  |      | DNMT3A | chr2:25467508   | C                | C    | p.Glu523Gly        | 16   | 280  | 0.06             | missense     | NM_022552              | c.A1569G           | NA       | NA     | NA          | 1    | 15   | 1    | NA                      | NA                   |
| LU-45  |      | GAS6   | chr13:114535710 | C                | T    | p.Val284Met        | 609  | 1235 | 0.49             | missense     | NM_000820              | c.G850A            | NA       | NA     | NA          | 293  | 316  | 1    | NA                      | NA                   |
| LU-46  |      | NOTCH1 | chr9:139393376  | GC               | G    | p.Ala2052fs        | 879  | 1981 |                  |              |                        |                    |          |        |             |      |      |      |                         |                      |

| Sample | Pair | Gene    | Location        | Ref | Alt  | AA Change           | FAO  | FDP  | Variant Fraction | Variant Type | Transcript ID (RefSeq) | Nucleotide Change  | ESP      | 1000G  | db135       | FSAF | FSAR | HRUN | Onconome Variant Class | Onconome Gene Class |     |
|--------|------|---------|-----------------|-----|------|---------------------|------|------|------------------|--------------|------------------------|--------------------|----------|--------|-------------|------|------|------|------------------------|---------------------|-----|
| LU-59  |      | NOTCH1  | chr9:139400317  | G   | A    | p.Thr134Met         | 269  | 1041 | 0.26             | missense     | NM_017617              | c.C4031T           | 0.00054  | NA     | NA          | 143  | 126  | 1    | NA                     | NA                  |     |
| LU-59  |      | STK11   | chr9:1207203    | G   | T    | NA                  | 861  | 1892 | 0.51             | splice       | NM_000455              | exon1:c.290+1G>T   | NA       | NA     | NA          | 520  | 341  | 1    | NA                     | NA                  |     |
| LU-59  |      | SETD2   | chr4:106157911  | A   | C    | p.Trp938Pro         | 994  | 1997 | 0.50             | missense     | NM_017628              | c.A2812C           | NA       | NA     | NA          | 584  | 410  | 1    | NA                     | NA                  |     |
| LU-60  |      | FOXL2   | chr3:138665210  | C   | T    | p.Gly119Ser         | 61   | 1046 | 0.06             | missense     | NM_023067              | c.G355A            | NA       | NA     | NA          | 29   | 32   | 3    | NA                     | NA                  |     |
| LU-60  |      | NOTCH1  | chr9:139403376  | GCC | GCT  | NA                  | 826  | 1972 | 0.42             | nonfsSub     | NM_017617              | c.3115_3117AGC     | NA       | NA     | NA          | 326  | 500  | 2    | NA                     | NA                  |     |
| LU-60  |      | STK11   | chr9:1207003    | TC  | T    | p.Thr32Ile          | 345  | 1963 | 0.18             | fsDel        | NM_000455              | c.920eC            | NA       | NA     | NA          | 210  | 135  | 2    | Deleterious            | LoF                 |     |
| LU-61  |      | ATM     | chr11:108186751 | G   | A    | p.Glu203Tlys        | 205  | 1993 | 0.10             | missense     | NM_000051              | c.G6109A           | NA       | NA     | NA          | 147  | 58   | 1    | NA                     | NA                  |     |
| LU-61  |      | TEBT    | chr5:1278423    | C   | T    | p.Glu705Lys         | 157  | 333  | 0.47             | missense     | NM_198253              | c.C2113A           | NA       | NA     | NA          | 101  | 56   | 1    | NA                     | NA                  |     |
| LU-63  |      | KRAS    | chr12:25398284  | G   | T    | p.Gly12Asp          | 468  | 1999 | 0.23             | missense     | NM_004985              | c.G356A            | NA       | NA     | rs121913529 | 110  | 358  | 2    | Hotspot                | GoF                 |     |
| LU-63  |      | MSH2    | chr2:47630382   | C   | A    | p.Gly18Ser          | 15   | 94   | 0.16             | missense     | NM_000251              | c.G52A             | NA       | NA     | NA          | 6    | 9    | 2    | NA                     | NA                  |     |
| LU-63  |      | TP53    | chr3:178916688  | G   | T    | p.Leu25Phe          | 176  | 1591 | 0.11             | missense     | NM_006218              | c.A75T             | NA       | NA     | NA          | 97   | 79   | 1    | NA                     | NA                  |     |
| LU-63  |      | TP53    | chr17:7578507   | G   | C    | p.Cys141Trp         | 325  | 746  | 0.44             | missense     | NM_000546              | c.C423G            | NA       | NA     | NA          | 166  | 159  | 3    | Hotspot                | LoF                 |     |
| LU-63  |      | UZAF1   | chr21:44524456  | G   | A    | p.Ser34Phe          | 672  | 1998 | 0.34             | missense     | NM_006758              | c.C101T            | 0.000077 | NA     | NA          | NA   | 483  | 189  | 1                      | Hotspot             | GoF |
| LU-64  |      | ACVRL1  | chr12:52309883  | G   | A    | p.Gly371Asp         | 170  | 2000 | 0.09             | missense     | NM_000020              | c.G1112A           | NA       | NA     | NA          | 12   | 158  | 3    | NA                     | NA                  |     |
| LU-64  |      | DNMT3A  | chr2:25467508   | T   | C    | p.Glu523Gly         | 16   | 259  | 0.06             | missense     | NM_022552              | c.A1568G           | NA       | NA     | NA          | 0    | 16   | 1    | NA                     | NA                  |     |
| LU-64  |      | EGFR    | chr7:55295924   | T   | A    | p.Leu861Gln         | 375  | 1999 | 0.19             | missense     | NM_005228              | c.T2582A           | NA       | NA     | rs121913444 | 145  | 230  | 1    | Hotspot                | GoF                 |     |
| LU-64  |      | FGFR3   | chr4:1801139    | G   | A    | p.Gly90Arg          | 18   | 345  | 0.05             | missense     | NM_000142              | c.G268A            | NA       | NA     | NA          | 6    | 12   | 4    | NA                     | NA                  |     |
| LU-64  |      | JAK1    | chr1:65312368   | C   | C    | p.Val651Met         | 581  | 1254 | 0.46             | missense     | NM_002227              | c.G1951A           | 0.001637 | 0.0014 | rs149986814 | 131  | 450  | 1    | NA                     | NA                  |     |
| LU-64  |      | FBXW7   | chr4:153332910  | G   | CAGG | p.Thr15_Gly16insPro | 917  | 1973 | 0.46             | nonfsIns     | NM_033632              | c.45_46insCCT      | 0.001757 | NA     | NA          | 494  | 423  | 1    | NA                     | NA                  |     |
| LU-65  |      | FBXW7   | chr4:153251882  | A   | T    | NA                  | 607  | 1997 | 0.304            | splice       | NM_018315              | exon7:c.882+2T>A   | NA       | NA     | NA          | 325  | 282  | 1    | NA                     | NA                  |     |
| LU-65  |      | KRAS    | chr12:25398284  | C   | T    | p.Gly12Asp          | 1159 | 1996 | 0.58             | missense     | NM_004985              | c.G35A             | NA       | NA     | rs121913529 | 332  | 827  | 2    | Hotspot                | GoF                 |     |
| LU-65  |      | MSH2    | chr2:47630379   | G   | A    | p.Val17Ile          | 10   | 76   | 0.13             | missense     | NM_000251              | c.G49A             | NA       | NA     | NA          | 4    | 6    | 2    | NA                     | NA                  |     |
| LU-65  |      | TIAF1   | chr17:27401105  | G   | A    | p.Pro38Leu          | 855  | 1395 | 0.61             | missense     | NM_004740              | c.C113T            | 0.000846 | 0.0005 | rs78839711  | 428  | 427  | 2    | NA                     | NA                  |     |
| LU-65  |      | TP53    | chr17:7578469   | G   | A    | p.Gly154Val         | 275  | 556  | 0.49             | missense     | NM_000546              | c.G461T            | NA       | NA     | NA          | 144  | 131  | 2    | Hotspot                | LoF                 |     |
| LU-67  |      | ATM     | chr11:108235819 | A   | G    | p.Tyr2954Cys        | 306  | 781  | 0.39             | missense     | NM_000051              | c.A8861G           | NA       | NA     | NA          | 147  | 159  | 1    | Hotspot                | LoF                 |     |
| LU-67  |      | ATM     | chr11:108121752 | CAG | C    | p.Glu522fs          | 965  | 1965 | 0.49             | missense     | NM_000051              | c.1561_1562del     | 0.00008  | NA     | NA          | 458  | 507  | 1    | Deleterious            | LoF                 |     |
| LU-67  |      | FOXL2   | chr3:138665210  | C   | T    | p.Gly119Ser         | 32   | 613  | 0.05             | missense     | NM_023067              | c.G355A            | NA       | NA     | NA          | 16   | 3    | NA   | NA                     | NA                  |     |
| LU-67  |      | RPS6KB1 | chr17:58012641  | G   | A    | p.Ala320Thr         | 9    | 139  | 0.06             | missense     | NM_003161              | c.G958A            | NA       | NA     | NA          | 7    | 2    | 1    | NA                     | NA                  |     |
| LU-67  |      | TP53    | chr17:7576853   | C   | A    | p.Gln331His         | 467  | 723  | 0.65             | missense     | NM_000546              | c.G993T            | NA       | NA     | NA          | 230  | 237  | 2    | NA                     | NA                  |     |
| LU-68  |      | ATM     | chr11:108160454 | A   | C    | p.Lys1454Asn        | 968  | 1989 | 0.49             | missense     | NM_000051              | c.A4362C           | 0.000231 | 0.0005 | rs148993589 | 565  | 403  | 5    | NA                     | NA                  |     |
| LU-68  |      | FBXW7   | chr4:153332910  | G   | CAGG | p.Thr15_Gly16insPro | 956  | 1990 | 0.48             | nonfsIns     | NM_033632              | c.45_46insCCT      | 0.001757 | NA     | NA          | 498  | 458  | 1    | NA                     | NA                  |     |
| LU-68  |      | KRAS    | chr12:25398285  | C   | A    | p.Gly12Cys          | 173  | 1612 | 0.11             | missense     | NM_004985              | c.G34T             | NA       | NA     | rs121913530 | 76   | 97   | 2    | Hotspot                | GoF                 |     |
| LU-68  |      | MSH2    | chr2:47630383   | G   | A    | p.Gly18Asp          | 11   | 76   | 0.14             | missense     | NM_000251              | c.G53A             | NA       | NA     | NA          | 2    | 9    | 2    | NA                     | NA                  |     |
| LU-68  |      | STK11   | chr9:1218492    | C   | T    | p.Gln123Ter         | 54   | 446  | 0.12             | nonsense     | NM_000455              | c.C367T            | NA       | NA     | NA          | 36   | 18   | 1    | Deleterious            | LoF                 |     |
| LU-68  |      | TP53    | chr17:7578419   | C   | A    | p.Glu171Ter         | 218  | 1978 | 0.11             | nonsense     | NM_000546              | c.G511T            | NA       | NA     | NA          | 136  | 82   | 2    | Deleterious            | LoF                 |     |
| LU-69  |      | KNSTRN  | chr15:40675041  | C   | T    | p.Ala2Val           | 23   | 457  | 0.05             | missense     | NM_033286              | c.C5T              | NA       | NA     | NA          | 10   | 13   | 1    | NA                     | NA                  |     |
| LU-69  |      | KRAS    | chr12:25398284  | C   | T    | p.Gly12Asp          | 709  | 2000 | 0.35             | missense     | NM_004985              | c.G35A             | NA       | NA     | rs121913529 | 188  | 521  | 2    | Hotspot                | GoF                 |     |
| LU-69  |      | MSH2    | chr2:47630334   | G   | A    | p.Ala2Thr           | 8    | 59   | 0.14             | missense     | NM_000251              | c.G4A              | NA       | NA     | rs63750466  | 6    | 2    | 2    | NA                     | NA                  |     |
| LU-69  |      | MSH2    | chr2:47630379   | G   | A    | p.Val17Ile          | 10   | 62   | 0.16             | missense     | NM_000251              | c.G49A             | NA       | NA     | NA          | 6    | 4    | 2    | NA                     | NA                  |     |
| LU-69  |      | TSC2    | chr16:2134287   | G   | A    | p.Arg1355Lys        | 16   | 123  | 0.13             | missense     | NM_000548              | c.G4064A           | NA       | NA     | NA          | 7    | 9    | 4    | NA                     | NA                  |     |
| LU-71  |      | ATM     | chr11:108236086 | G   | G    | p.Arg3008Gly        | 1702 | 1987 | 0.86             | missense     | NM_000051              | c.C9022G           | NA       | NA     | NA          | 911  | 791  | 1    | Hotspot                | LoF                 |     |
| LU-71  |      | CBL     | chr11:119149003 | G   | A    | p.Trp408Ter         | 30   | 429  | 0.07             | nonsense     | NM_005188              | c.C1223A           | NA       | NA     | NA          | 13   | 17   | 2    | NA                     | NA                  |     |
| LU-71  |      | FGFR1   | chr8:38271707   | G   | A    | p.His748Tyr         | 40   | 634  | 0.06             | missense     | NM_015850              | c.C2143T           | NA       | NA     | NA          | 28   | 12   | 1    | NA                     | NA                  |     |
| LU-71  |      | IDH1    | chr2:209113188  | G   | T    | p.Val107Ile         | 39   | 709  | 0.06             | missense     | NM_005896              | c.G319A            | 0.000077 | NA     | NA          | NA   | 21   | 18   | 2                      | NA                  | NA  |
| LU-71  |      | JAK2    | chr9:5078339    | G   | A    | p.Ala676Thr         | 68   | 969  | 0.07             | missense     | NM_004972              | c.G2026A           | NA       | NA     | NA          | 33   | 35   | 1    | NA                     | NA                  |     |
| LU-71  |      | JAK2    | chr9:5072501    | C   | T    | p.Leu551Phe         | 10   | 59   | 0.17             | missense     | NM_004972              | c.C1651T           | NA       | NA     | NA          | 7    | 3    | 2    | NA                     | NA                  |     |
| LU-71  |      | JAK3    | chr19:17945958  | G   | T    | p.Asp661Asn         | 74   | 1161 | 0.06             | missense     | NM_000215              | c.G1981A           | NA       | NA     | NA          | 41   | 33   | 1    | NA                     | NA                  |     |
| LU-71  |      | KIT     | chr4:5594287    | G   | A    | p.Gly664Arg         | 42   | 761  | 0.06             | missense     | NM_000222              | c.G1990A           | NA       | NA     | rs121913679 | 18   | 24   | 2    | NA                     | NA                  |     |
| LU-71  |      | KIT     | chr4:5593672    | C   | T    | p.His580Tyr         | 19   | 300  | 0.06             | missense     | NM_000222              | c.C1738T           | NA       | NA     | NA          | 9    | 10   | 1    | NA                     | NA                  |     |
| LU-71  |      | KNSTRN  | chr15:40675107  | C   | T    | p.Ser24Phe          | 35   | 350  | 0.10             | missense     | NM_033286              | c.C71T             | NA       | NA     | NA          | 12   | 23   | 3    | Hotspot                | GoF                 |     |
| LU-71  |      | KRAS    | chr12:25398284  | C   | G    | p.Gly12Ala          | 1307 | 1990 | 0.66             | missense     | NM_004985              | c.G35C             | NA       | NA     | rs121913529 | 419  | 888  | 2    | Hotspot                | GoF                 |     |
| LU-71  |      | MPL     | chr1:43815010   | G   | A    | p.Trp515Ter         | 40   | 781  | 0.05             | nonsense     | NM_005373              | c.G1545A           | NA       | NA     | NA          | 16   | 24   | 2    | NA                     | NA                  |     |
| LU-71  |      | MSH2    | chr2:47630379   | G   | A    | p.Val17Ile          | 24   | 137  | 0.18             | missense     | NM_000251              | c.G49A             | NA       | NA     | NA          | 10   | 14   | 2    | NA                     | NA                  |     |
| LU-71  |      | NF1     | chr17:29553609  | C   | T    | p.Arg720Trp         | 28   | 278  | 0.10             | missense     | NM_000267              | c.C2158T           | NA       | NA     | NA          | 11   | 17   | 2    | NA                     | NA                  |     |
| LU-71  |      | NF1     | chr17:29664880  | G   | A    | p.Trp229Ter         | 30   | 288  | 0.10             | nonsense     | NM_000267              | c.G6623A           | NA       | NA     | NA          | 19   | 11   | 2    | Deleterious            | LoF                 |     |
| LU-71  |      | PDGFRA  | chr4:55146557   | G   | A    | p.Pro744Leu         | 62   | 1216 | 0.05             | missense     | NM_006206              | c.C2231T           | NA       | NA     | NA          | 32   | 30   | 4    | NA                     | NA                  |     |
| LU-71  |      | PIK3CA  | chr3:178928046  | C   | A    | p.Ala442Thr         | 11   | 185  | 0.06             | missense     | NM_006218              | c.G1324A           | NA       | NA     | NA          | 3    | 8    | 2    | NA                     | NA                  |     |
| LU-71  |      | PPP2R1A | chr19:52716331  | G   | T    | p.Val259Phe         | 351  | 1236 | 0.28             | missense     | NM_014225              | c.G775T            | NA       | NA     | NA          | 185  | 166  | 1    | NA                     | NA                  |     |
| LU-71  |      | RB1     | chr13:48955428  | C   | T    | p.Pro515Leu         | 17   | 94   | 0.18             | missense     | NM_000321              | c.C1544T           | NA       | NA     | NA          | 9    | 8    | 3    | NA                     | NA                  |     |
| LU-71  |      | TSC2    | chr16:2138287   | G   | A    | p.Asp1734Asn        | 23   | 221  | 0.10             | missense     | NM_000548              | c.G5200A           | NA       | NA     | NA          | 1    | 22   | 1    | NA                     | NA                  |     |
| LU-71  |      | UZAF1   | chr21:44524469  | C   | T    | p.Gly30Arg          | 45   | 820  | 0.05             | missense     | NM_006758              | c.G88A             | NA       | NA     | NA          | 28   | 17   | 2    | NA                     | NA                  |     |
| LU-74  |      | ATP1B   | chr3:182602594  | G   | A    | p.Ala855Thr         | 277  | 887  | 0.31             | missense     | NM_014616              | c.G2563A           | 0.002768 | 0.0032 | rs114409384 | 145  | 132  | 1    | NA                     | NA                  |     |
| LU-74  |      | BRAF    | chr7:140481411  | G   | A    | p.Gly466Val         | 973  | 1983 | 0.49             | missense     | NM_004333              | c.G1397T           | NA       | NA     | rs121913351 | 536  | 437  | 2    | Hotspot                | GoF                 |     |
| LU-74  |      | BRCA2   | chr13:3294591   | A   | T    | NA                  | 100  | 696  | 0.1437           | splice       | NM_000059              | exon20:c.8488-2A>T | NA       | NA     | NA          | 46   | 54   | 1    | NA                     | NA                  |     |
| LU-74  |      | DNMT3A  | chr2:25467508   | T   | C    | p.Glu523Gly         | 17   | 307  | 0.06             | missense     | NM_022552              | c.A1568G           | NA       | NA     | NA          | 1    | 16   | 1    | NA                     | NA                  |     |
| LU-74  |      | KNSTRN  | chr15:40675109  | C   | T    | p.His25Tyr          | 37   | 696  | 0.05             | missense     | NM_033286              | c.C73T             | NA       | NA     | NA          | 15   | 22   | 3    | NA                     | NA                  |     |
| LU-74  |      | KNSTRN  | chr15:40675107  | C   | T    | p.Ser24Phe          | 40   | 698  | 0.06             | missense     | NM_033286              | c.C71T             | NA       | NA     | NA          | 18   | 22   | 3    | Hotspot                | GoF                 |     |
| LU-74  |      | NF1     | chr17:29553550  | C   | T    | p.Thr700Ile         | 51   | 416  | 0.12             | missense     | NM_000267              | c.C2099T           | NA       | NA     | NA          | 38   | 13   | 1    | NA                     | NA                  |     |
| LU-75  |      | BAP1    | chr3:52439299   | C   | T    | p.Glu315Lys         | 13   | 102  | 0.13             | missense     | NM_004656              | c.G943A            | NA       | NA     | NA          | 5    | 8    | 2    | NA                     | NA                  |     |
| LU-75  |      | BAP1    | chr3:52439236   | C   | T    | p.Val336Met         | 15   | 50   | 0.30             | missense     | NM_004656              | c.G1006A           | NA       | NA     | NA          | 15   | 0    | 2    | NA                     | NA                  |     |
| LU-75  |      | CTNNB1  | chr3:41266137   | C   | T    |                     |      |      |                  |              |                        |                    |          |        |             |      |      |      |                        |                     |     |

| Sample | Pair | Gene           | Location        | Ref              | Alt | AA Change                     | FAO  | FDP  | Variant Fraction | Variant Type | Transcript ID (RefSeq) | Nucleotide Change | ESP      | 1000G  | db135       | FSAF        | FSAR | HRUN | Oncomine Variant Class | Oncomine Gene Class |     |
|--------|------|----------------|-----------------|------------------|-----|-------------------------------|------|------|------------------|--------------|------------------------|-------------------|----------|--------|-------------|-------------|------|------|------------------------|---------------------|-----|
| LU-79  |      | <i>DNMT3A</i>  | chr2:25467508   | T                | C   | p.Glu523Gly                   | 20   | 376  | 0.05             | missense     | NM_022552              | c.A1568G          | NA       | NA     | NA          | 0           | 20   | 1    | NA                     | NA                  |     |
| LU-79  |      | <i>EGFR</i>    | chr7:55242464   | AGGAATTAAGAGAAGC | A   | p.Glu746_Ala750del            | 1134 | 1918 | 0.59             | nonfsDel     | NM_005228              | c.2235_2249del    | NA       | NA     | rs121913421 | 705         | 429  | 2    | Hotspot                | GoF                 |     |
| LU-79  |      | <i>NOTCH1</i>  | chr9:139391199  | G                | A   | p.Ala2331Val                  | 22   | 201  | 0.11             | missense     | NM_017617              | c.C6992T          | NA       | NA     | NA          | 10          | 12   | 1    | NA                     | NA                  |     |
| LU-79  |      | <i>PIK3CA</i>  | chr3:178928118  | C                | T   | p.Pro466Ser                   | 23   | 422  | 0.05             | missense     | NM_006218              | c.C1396T          | NA       | NA     | NA          | 7           | 16   | 2    | NA                     | NA                  |     |
| LU-79  |      | <i>STK11</i>   | chr19:1226603   | C                | T   | p.Ala420Val                   | 7    | 53   | 0.13             | missense     | NM_000455              | c.C1259T          | 0.000092 | NA     | NA          | NA          | 7    | 0    | 2                      | NA                  | NA  |
| LU-79  |      | <i>TP53</i>    | chr17:7578212   | G                | A   | p.Arg213Ter                   | 730  | 1996 | 0.37             | nonsense     | NM_000546              | c.C637T           | NA       | NA     | NA          | 420         | 310  | 1    | Deleterious            | LoF                 |     |
| LU-82  |      | <i>CTNWB1</i>  | chr3:41266113   | C                | G   | p.Ser37Cys                    | 320  | 1946 | 0.16             | missense     | NM_001904              | c.C110G           | NA       | NA     | rs121913403 | 166         | 154  | 1    | Hotspot                | GoF                 |     |
| LU-82  |      | <i>EGFR</i>    | chr7:55242465   | G                | G   | p.746_750del                  | 683  | 1844 | 0.35             | nonfsDel     | NM_005228              | c.2236_2250del    | NA       | NA     | NA          | 373         | 310  | 2    | Hotspot                | GoF                 |     |
| LU-82  |      | <i>FBXW7</i>   | chr4:153332939  | A                | G   | p.Leu69Pro                    | 762  | 2000 | 0.38             | missense     | NM_030532              | c.T170C           | 0.000077 | NA     | NA          | rs139074724 | 192  | 570  | 1                      | NA                  | NA  |
| LU-83  |      | <i>KRAS</i>    | chr12:25398284  | C                | T   | p.Asp594Asn                   | 153  | 2000 | 0.08             | missense     | NM_004333              | c.G1780A          | NA       | NA     | NA          | 72          | 81   | 1    | Hotspot                | GoF                 |     |
| LU-83  |      | <i>BRAF</i>    | chr12:25398284  | C                | T   | p.Gly192Val                   | 137  | 1922 | 0.07             | missense     | NM_004985              | c.G35T            | NA       | NA     | rs121913529 | 43          | 94   | 2    | Hotspot                | GoF                 |     |
| LU-83  |      | <i>STK11</i>   | chr19:1226698   | C                | G   | p.Cys418Trp                   | 33   | 99   | 0.33             | missense     | NM_000455              | c.C1254G          | NA       | NA     | NA          | 11          | 22   | 1    | NA                     | NA                  |     |
| LU-83  |      | <i>TET2</i>    | chr4:106158344  | A                | G   | p.Glu1082Gly                  | 547  | 1291 | 0.42             | missense     | NM_017628              | c.A3245G          | NA       | NA     | NA          | 289         | 278  | 1    | NA                     | NA                  |     |
| LU-85  |      | <i>TP53</i>    | chr17:7577548   | A                | G   | p.Gly245Cys                   | 468  | 717  | 0.65             | missense     | NM_000546              | c.G733T           | NA       | NA     | rs28934575  | 208         | 260  | 2    | Hotspot                | LoF                 |     |
| LU-87  |      | <i>ACVRL1</i>  | chr12:52309883  | C                | A   | p.Gly371Asp                   | 79   | 1481 | 0.05             | missense     | NM_000200              | c.G1112A          | NA       | NA     | NA          | 4           | 75   | 3    | NA                     | NA                  |     |
| LU-87  |      | <i>CDH1</i>    | chr16:68855930  | A                | G   | p.Trp580Ala                   | 1158 | 1995 | 0.58             | missense     | NM_000360              | c.A1738G          | NA       | NA     | NA          | 510         | 648  | 1    | NA                     | NA                  |     |
| LU-87  |      | <i>TP53</i>    | chr17:7578457   | A                | A   | p.Arg158Leu                   | 264  | 798  | 0.33             | missense     | NM_000546              | c.G473T           | NA       | NA     | NA          | 116         | 148  | 1    | Hotspot                | LoF                 |     |
| LU-88  |      | <i>BRC2</i>    | chr13:32913152  | A                | G   | p.Ser1554Gly                  | 231  | 2000 | 0.12             | missense     | NM_000059              | c.A4660G          | NA       | NA     | NA          | 121         | 110  | 1    | NA                     | NA                  |     |
| LU-88  |      | <i>CDKN2A</i>  | chr9:21971108   | C                | A   | p.Asp84Tyr                    | 352  | 1837 | 0.19             | missense     | NM_000077              | c.G250T           | NA       | NA     | rs11552822  | 170         | 182  | 1    | Hotspot                | LoF                 |     |
| LU-88  |      | <i>TP53</i>    | chr17:7578442   | T                | C   | p.Tyr163Cys                   | 119  | 885  | 0.13             | missense     | NM_000546              | c.A488G           | NA       | NA     | rs148924904 | 55          | 64   | 3    | Hotspot                | LoF                 |     |
| LU-89  |      | <i>ATM</i>     | chr11:108115541 | C                | G   | p.Asn230Ser                   | 301  | 1996 | 0.15             | missense     | NM_000051              | c.A689G           | NA       | NA     | NA          | 158         | 143  | 3    | NA                     | NA                  |     |
| LU-89  |      | <i>PPP2R1A</i> | chr19:52716272  | A                | T   | p.Asp239Val                   | 550  | 1199 | 0.46             | missense     | NM_014225              | c.A716T           | NA       | NA     | NA          | 299         | 251  | 1    | NA                     | NA                  |     |
| LU-89  |      | <i>TP53</i>    | chr17:7574017   | C                | A   | p.Arg337Leu                   | 230  | 714  | 0.32             | missense     | NM_000546              | c.G1010T          | NA       | NA     | NA          | 107         | 123  | 1    | Hotspot                | LoF                 |     |
| LU-90  |      | <i>CDH1</i>    | chr16:68845646  | G                | A   | p.Ala298Thr                   | 728  | 1997 | 0.36             | missense     | NM_004360              | c.G892A           | 0.000154 | 0.0009 | rs142822590 | 363         | 365  | 1    | NA                     | NA                  |     |
| LU-90  |      | <i>KRAS</i>    | chr12:25398284  | C                | T   | p.Gly12Asp                    | 475  | 1908 | 0.25             | missense     | NM_004985              | c.G35A            | NA       | NA     | rs121913529 | 96          | 379  | 2    | Hotspot                | GoF                 |     |
| LU-90  |      | <i>NOTCH1</i>  | chr9:139400180  | G                | T   | p.Pro1390Thr                  | 1049 | 1998 | 0.53             | missense     | NM_017617              | c.C4168A          | NA       | 0.0005 | rs191645600 | 563         | 486  | 4    | NA                     | NA                  |     |
| LU-90  |      | <i>TP53</i>    | chr17:7577121   | G                | A   | p.Arg273Cys                   | 301  | 1134 | 0.27             | missense     | NM_000546              | c.C817T           | NA       | NA     | rs121913343 | 183         | 118  | 1    | Hotspot                | LoF                 |     |
| LU-95  |      | <i>BRC2</i>    | chr13:32918787  | G                | A   | p.D2312N                      | 16   | 96   | 0.17             | missense     | NM_000059              | c.G6934A          | NA       | NA     | NA          | 6           | 10   | 1    | NA                     | NA                  |     |
| LU-95  |      | <i>BRC2</i>    | chr13:32918733  | G                | C   | p.D2294H                      | 19   | 92   | 0.21             | missense     | NM_000059              | c.G6880C          | NA       | NA     | NA          | 8           | 11   | 1    | NA                     | NA                  |     |
| LU-95  |      | <i>BRC2</i>    | chr13:32918738  | G                | T   | p.R2295S                      | 19   | 92   | 0.21             | missense     | NM_000059              | c.G6885T          | NA       | NA     | NA          | 8           | 11   | 2    | NA                     | NA                  |     |
| LU-95  |      | <i>CDKN2A</i>  | chr9:21971110   | T                | C   | p.H83R                        | 535  | 813  | 0.66             | missense     | NM_000077              | c.A248G           | NA       | NA     | NA          | 255         | 280  | 1    | NA                     | NA                  |     |
| LU-95  |      | <i>NF1</i>     | chr17:29528086  | C                | G   | p.S36X                        | 213  | 655  | 0.33             | nonsense     | NM_000267              | c.C1094G          | NA       | NA     | NA          | 83          | 130  | 1    | NA                     | NA                  |     |
| LU-95  |      | <i>NFE2L2</i>  | chr2:178098944  | C                | T   | p.R34Q                        | 349  | 1381 | 0.25             | missense     | NM_006164              | c.G101A           | NA       | NA     | NA          | 167         | 182  | 1    | NA                     | NA                  |     |
| LU-95  |      | <i>TET2</i>    | chr4:106158395  | C                | G   | p.S1099C                      | 124  | 1211 | 0.10             | missense     | NM_017628              | c.C3296G          | NA       | NA     | NA          | 57          | 67   | 1    | NA                     | NA                  |     |
| LU-97  |      | <i>APC</i>     | chr5:112176308  | G                | A   | p.Glu1673Lys                  | 1580 | 1997 | 0.79             | missense     | NM_000038              | c.G5017A          | NA       | NA     | NA          | 866         | 714  | 1    | NA                     | NA                  |     |
| LU-97  |      | <i>MTOR</i>    | chr1:11189840   | C                | T   | p.Arg1890His                  | 172  | 944  | 0.18             | missense     | NM_004958              | c.G5669A          | 0.000077 | NA     | NA          | NA          | 96   | 76   | 1                      | NA                  | NA  |
| LU-97  |      | <i>TP53</i>    | chr17:7578555   | C                | T   | NA                            | 1332 | 1784 | 0.7466           | splice       | NM_000546              | exon:c.376-1G>A   | NA       | NA     | NA          | 663         | 669  | 1    | NA                     | NA                  |     |
| LU-99  |      | <i>ESR1</i>    | chr6:152332881  | T                | C   | p.Met396Thr                   | 889  | 1997 | 0.45             | missense     | NM_000125              | c.T1187C          | NA       | NA     | NA          | 410         | 479  | 1    | NA                     | NA                  |     |
| LU-99  |      | <i>MSH2</i>    | chr2:47630383   | G                | A   | p.Gly18Asp                    | 8    | 73   | 0.11             | missense     | NM_000251              | c.G53A            | NA       | NA     | NA          | 4           | 4    | 2    | NA                     | NA                  |     |
| LU-99  |      | <i>TP53</i>    | chr17:7577538   | C                | T   | p.Arg248Gln                   | 541  | 1518 | 0.36             | missense     | NM_000546              | c.G743A           | 0.000077 | NA     | NA          | rs11540652  | 278  | 263  | 2                      | Hotspot             | LoF |
| LU-100 |      | <i>EGFR</i>    | chr7:55242465   | GGAATTAAGA       | G   | p.746_748del                  | 446  | 1917 | 0.23             | nonfsDel     | NM_005228              | c.2236_2244del    | NA       | NA     | NA          | 287         | 159  | 2    | Hotspot                | GoF                 |     |
| LU-100 |      | <i>UZAF1</i>   | chr21:44524456  | G                | A   | p.Ser34Phe                    | 421  | 1998 | 0.21             | missense     | NM_006758              | c.C101T           | 0.000077 | NA     | NA          | NA          | 210  | 211  | 1                      | Hotspot             | GoF |
| LU-101 |      | <i>APC</i>     | chr5:112177145  | A                | C   | p.Gln1952Ter                  | 4    | 52   | 0.08             | nonsense     | NM_000038              | c.C5854T          | NA       | NA     | NA          | 2           | 1    | 1    | Deleterious            | LoF                 |     |
| LU-101 |      | <i>APC</i>     | chr5:112179284  | C                | T   | p.Pro266Ser                   | 10   | 86   | 0.12             | missense     | NM_000038              | c.G7993T          | NA       | NA     | NA          | 3           | 7    | 3    | NA                     | NA                  |     |
| LU-101 |      | <i>FBXW7</i>   | chr4:153244271  | C                | T   | p.Cys629Tyr                   | 6    | 50   | 0.12             | missense     | NM_018315              | c.G1646A          | NA       | NA     | NA          | 2           | 4    | 1    | NA                     | NA                  |     |
| LU-101 |      | <i>FBXW7</i>   | chr4:153244281  | C                | T   | p.Ala626Thr                   | 7    | 50   | 0.14             | missense     | NM_018315              | c.G1636A          | NA       | NA     | NA          | 4           | 3    | 1    | NA                     | NA                  |     |
| LU-101 |      | <i>KRAS</i>    | chr12:25378585  | C                | T   | p.Gly138Glu                   | 7    | 88   | 0.08             | missense     | NM_004985              | c.G413A           | NA       | NA     | NA          | 6           | 1    | 2    | NA                     | NA                  |     |
| LU-101 |      | <i>KRAS</i>    | chr12:25398281  | C                | T   | p.Gly13Asp                    | 176  | 1999 | 0.09             | missense     | NM_004985              | c.G38A            | NA       | NA     | rs112445441 | 74          | 102  | 2    | Hotspot                | GoF                 |     |
| LU-101 |      | <i>RB1</i>     | chr13:49050928  | C                | T   | p.Pro871Leu                   | 8    | 72   | 0.11             | missense     | NM_000321              | c.C2612T          | NA       | NA     | NA          | 5           | 3    | 2    | NA                     | NA                  |     |
| LU-103 |      | <i>BRAF</i>    | chr7:140453149  | C                | G   | p.Gly596Arg                   | 661  | 1991 | 0.33             | missense     | NM_004333              | c.G1786C          | NA       | NA     | rs121913361 | 329         | 332  | 2    | Hotspot                | GoF                 |     |
| LU-103 |      | <i>KRAS</i>    | chr12:25378643  | C                | T   | p.Asp119Asn                   | 119  | 1983 | 0.06             | missense     | NM_004985              | c.G355A           | NA       | NA     | NA          | 72          | 47   | 1    | NA                     | NA                  |     |
| LU-103 |      | <i>NOTCH1</i>  | chr9:139401807  | C                | T   | p.Cys1198Tyr                  | 309  | 800  | 0.39             | missense     | NM_017617              | c.G3593A          | NA       | NA     | NA          | 209         | 100  | 1    | NA                     | NA                  |     |
| LU-103 |      | <i>STK11</i>   | chr19:1220381   | T                | A   | p.Cys158Ter                   | 323  | 625  | 0.52             | nonsense     | NM_000455              | c.T474A           | NA       | NA     | NA          | 186         | 137  | 1    | Deleterious            | LoF                 |     |
| LU-104 |      | <i>ATM</i>     | chr11:108170506 | A                | C   | p.Ser1691Arg                  | 748  | 1935 | 0.39             | missense     | NM_000051              | c.A5071C          | 0.002154 | 0.0005 | rs1800059   | 328         | 420  | 1    | NA                     | NA                  |     |
| LU-104 |      | <i>BRC1</i>    | chr17:41226488  | C                | A   | p.Ser1533Ile                  | 321  | 528  | 0.61             | missense     | NM_007294              | c.G4535T          | 0.002768 | 0.0005 | rs1800744   | 164         | 157  | 1    | NA                     | NA                  |     |
| LU-104 |      | <i>CDKN2A</i>  | chr9:21971129   | TGGCGGGGTC       | T   | p.Asp74_Ala76del              | 345  | 547  | 0.63             | nonfsDel     | NM_000077              | c.220_228del      | NA       | NA     | NA          | 176         | 169  | 2    | NA                     | NA                  |     |
| LU-105 |      | <i>BRC2</i>    | chr13:32913013  | GG               | TT  | p.Gln1507_Gly1508delinsHisTer | 429  | 1992 | 0.22             | nonfsSub     | NM_000059              | c.4521_4522TT     | NA       | NA     | NA          | 223         | 206  | 3    | Deleterious            | LoF                 |     |
| LU-106 |      | <i>BRC1</i>    | chr17:41243779  | C                | G   | p.Glu1257Gln                  | 810  | 1997 | 0.41             | missense     | NM_007294              | c.G3769C          | NA       | NA     | NA          | 384         | 426  | 1    | NA                     | NA                  |     |
| LU-106 |      | <i>PTEN</i>    | chr10:89717615  | C                | T   | p.Gln214Ter                   | 842  | 2000 | 0.42             | nonsense     | NM_000314              | c.C640T           | NA       | NA     | rs121909227 | 391         | 451  | 1    | Deleterious            | LoF                 |     |
| LU-106 |      | <i>TP53</i>    | chr17:7577556   | C                | A   | p.Cys242Phe                   | 986  | 1912 | 0.52             | missense     | NM_000546              | c.G725T           |          |        |             |             |      |      |                        |                     |     |

| Sample | Pair | Gene   | Location        | Ref              | Alt  | AA Change          | FAO  | FDP  | Variant Fraction | Variant Type | Transcript ID (RefSeq) | Nucleotide Change | ESP      | 1000G  | db135       | FSAF | FSAR | HRUN | Onncomine Variant Class | Onncomine Gene Class |
|--------|------|--------|-----------------|------------------|------|--------------------|------|------|------------------|--------------|------------------------|-------------------|----------|--------|-------------|------|------|------|-------------------------|----------------------|
| LU-121 |      | CDH1   | chr16:68842753  | T                | G    | NA                 | 191  | 1471 | 0.1298           | splice       | NM_004360              | exon5:c.687+21>G  | NA       | NA     | NA          | NA   | 1    | 1    | NA                      | NA                   |
| LU-121 |      | KRAS   | chr12:32598282  | C                | A    | p.Gly13Cys         | 801  | 1994 | 0.40             | missense     | NM_004985              | c.G37T            | NA       | NA     | rs121913535 | 90   | 401  | 2    | Hotspot                 | GoF                  |
| LU-123 |      | EGFR   | chr7:55259524   | T                | A    | p.Leu861Gln        | 516  | 1997 | 0.26             | missense     | NM_005228              | c.T2582A          | NA       | NA     | rs121913444 | 251  | 265  | 1    | Hotspot                 | GoF                  |
| LU-123 |      | NF1    | chr17:29664858  | A                | G    | p.Thr222Ala        | 590  | 1483 | 0.40             | missense     | NM_00601G              | c.A6601G          | NA       | NA     | NA          | 291  | 299  | 2    | NA                      | NA                   |
| LU-123 |      | TP53   | chr17:7577142   | C                | T    | p.Gly266Arg        | 449  | 1094 | 0.41             | missense     | NM_000546              | c.G796A           | NA       | NA     | NA          | 211  | 238  | 3    | Hotspot                 | LoF                  |
| LU-127 |      | BRCA1  | chr17:41243893  | C                | T    | p.Glu1219Lys       | 625  | 1999 | 0.31             | missense     | NM_007294              | c.G3655A          | NA       | NA     | rs80356921  | 293  | 332  | 1    | NA                      | NA                   |
| LU-127 |      | CDH1   | chr16:68853227  | T                | C    | p.Pro537Leu        | 1066 | 1554 | 0.69             | missense     | NM_004380              | c.C1610T          | NA       | NA     | NA          | 604  | 462  | 2    | NA                      | NA                   |
| LU-127 |      | DNMT3A | chr2:25467508   | C                | T    | p.Glu523Gly        | 16   | 253  | 0.06             | missense     | NM_022552              | c.A1568G          | NA       | NA     | NA          | 3    | 13   | 1    | NA                      | NA                   |
| LU-127 |      | RB1    | chr13:48941708  | G                | A    | p.Asp340Asn        | 199  | 1712 | 0.42             | missense     | NM_003021              | c.G1018A          | NA       | NA     | NA          | 88   | 111  | 1    | NA                      | NA                   |
| LU-127 |      | TP53   | chr17:7578187   | T                | C    | p.Glu221Val        | 571  | 1997 | 0.29             | missense     | NM_000546              | c.A662T           | NA       | NA     | NA          | 324  | 247  | 1    | Hotspot                 | LoF                  |
| LU-127 |      | TP53   | chr17:7578413   | A                | C    | p.Val173Leu        | 1193 | 1993 | 0.60             | missense     | NM_000546              | c.G517T           | NA       | NA     | NA          | 626  | 567  | 1    | Hotspot                 | LoF                  |
| LU-128 |      | STK11  | chr19:1221313   | GC               | G    | p.Pro281fs         | 1250 | 1965 | 0.64             | fsDel        | NM_000455              | c.837delC         | NA       | NA     | NA          | 555  | 695  | 6    | Deleterious             | LoF                  |
| LU-130 |      | BRCA2  | chr13:32945172  | A                | C    | p.Glu2856Ala       | 923  | 2000 | 0.46             | missense     | NM_000059              | c.A8567C          | 0.001461 | 0.0005 | rs11571747  | 399  | 524  | 1    | NA                      | NA                   |
| LU-130 |      | CDKN2A | chr9:21971108   | C                | T    | p.Asp84Asn         | 1074 | 1915 | 0.56             | missense     | NM_000077              | c.G250A           | NA       | NA     | NA          | 502  | 572  | 1    | Hotspot                 | LoF                  |
| LU-130 |      | TP53   | chr17:7577157   | T                | A    | NA                 | 851  | 1495 | 0.5692           | splice       | NM_000546              | exon9:c.783-2A>T  | NA       | NA     | NA          | 472  | 379  | 1    | NA                      | NA                   |
| LU-130 |      | TSC1   | chr9:135782220  | C                | A    | p.Glu446Ter        | 920  | 1998 | 0.46             | nonsense     | NM_000368              | c.G1336T          | NA       | NA     | NA          | 455  | 465  | 1    | Deleterious             | LoF                  |
| LU-130 |      | TSC2   | chr16:2134283   | G                | T    | p.Gly1354Cys       | 76   | 263  | 0.29             | missense     | NM_000548              | c.G4060T          | NA       | NA     | NA          | 37   | 39   | 2    | NA                      | NA                   |
| LU-132 |      | APC    | chr5:112175651  | A                | G    | p.Lys1454Glu       | 624  | 1954 | 0.32             | missense     | NM_000038              | c.A4360G          | 0.002461 | 0.0009 | rs11866410  | 365  | 259  | 5    | Hotspot                 | LoF                  |
| LU-132 |      | BRCA1  | chr17:41246589  | C                | A    | p.Arg320Ile        | 374  | 1999 | 0.19             | missense     | NM_007294              | c.G959T           | NA       | NA     | NA          | 163  | 211  | 1    | NA                      | NA                   |
| LU-132 |      | KRAS   | chr12:25398284  | C                | T    | p.Gly12Asp         | 1116 | 1999 | 0.56             | missense     | NM_004985              | c.G35A            | NA       | NA     | rs121913529 | 350  | 766  | 2    | Hotspot                 | GoF                  |
| LU-132 |      | RET2   | chr4:106157398  | A                | G    | p.Asn767Asp        | 1324 | 2000 | 0.66             | missense     | NM_017628              | c.A2299G          | 0.002076 | 0.0014 | rs147167901 | 642  | 682  | 2    | NA                      | NA                   |
| LU-133 |      | ACVRL1 | chr12:52307552  | G                | C    | p.Gly175Arg        | 699  | 1419 | 0.49             | missense     | NM_000203              | c.G523C           | NA       | NA     | NA          | 415  | 284  | 5    | NA                      | NA                   |
| LU-133 |      | GATA3  | chr10:8115904   | G                | G    | p.Thr418Ser        | 420  | 1997 | 0.21             | missense     | NM_002051              | c.C1250G          | NA       | NA     | NA          | 238  | 182  | 2    | NA                      | NA                   |
| LU-133 |      | KRAS   | chr12:25398285  | C                | A    | p.Gly12Cys         | 706  | 1558 | 0.45             | missense     | NM_004985              | c.G34T            | NA       | NA     | rs121913530 | 424  | 412  | 2    | Hotspot                 | GoF                  |
| LU-133 |      | TP53   | chr17:7577550   | C                | A    | p.Gly244Val        | 989  | 1999 | 0.49             | missense     | NM_000546              | c.G731T           | NA       | NA     | NA          | 482  | 507  | 3    | Hotspot                 | LoF                  |
| LU-134 |      | ABL1   | chr9:133738372  | G                | T    | p.Glu258Ter        | 105  | 301  | 0.35             | nonsense     | NM_005157              | c.G772T           | NA       | NA     | NA          | 51   | 54   | 1    | NA                      | NA                   |
| LU-134 |      | DNMT3A | chr2:25457231   | GC               | G    | p.Arg885fs         | 35   | 110  | 0.32             | fsDel        | NM_022552              | c.2655delG        | NA       | NA     | NA          | 16   | 19   | 2    | NA                      | NA                   |
| LU-134 |      | FOXL2  | chr3:138665172  | G                | T    | p.Asp131Glu        | 74   | 270  | 0.27             | missense     | NM_023067              | c.C393A           | NA       | NA     | NA          | 33   | 41   | 3    | NA                      | NA                   |
| LU-134 |      | MYCL   | chr1:40363606   | C                | A    | p.Arg208Met        | 704  | 1453 | 0.48             | missense     | NM_00103081            | c.G533T           | NA       | NA     | NA          | 334  | 370  | 2    | NA                      | NA                   |
| LU-134 |      | TP53   | chr17:7577535   | C                | A    | p.Arg249Met        | 530  | 1115 | 0.48             | missense     | NM_000546              | c.G746T           | NA       | NA     | NA          | 258  | 272  | 2    | Hotspot                 | LoF                  |
| LU-135 |      | MSH2   | chr2:47630458   | A                | G    | p.Tyr43Cys         | 654  | 1281 | 0.51             | missense     | NM_000251              | c.A128G           | 0.000077 | NA     | rs17217723  | 305  | 349  | 1    | NA                      | NA                   |
| LU-135 |      | TP53   | chr17:7577095   | G                | C    | p.Asp281Glu        | 235  | 1307 | 0.18             | missense     | NM_000546              | c.C843G           | NA       | NA     | NA          | 127  | 108  | 2    | Hotspot                 | LoF                  |
| LU-135 |      | TP53   | chr17:7577534   | C                | A    | p.Arg249Ser        | 371  | 1996 | 0.19             | missense     | NM_000546              | c.G747T           | NA       | NA     | rs28934571  | 189  | 182  | 2    | Hotspot                 | LoF                  |
| LU-137 |      | KRAS   | chr12:25398285  | C                | A    | p.Gly12Cys         | 214  | 1720 | 0.12             | missense     | NM_004985              | c.G34T            | NA       | NA     | rs121913530 | 98   | 116  | 2    | Hotspot                 | GoF                  |
| LU-137 |      | MSH2   | chr2:47630383   | G                | A    | p.Gly18Asp         | 10   | 83   | 0.12             | missense     | NM_000251              | c.G53A            | NA       | NA     | NA          | 3    | 7    | 2    | NA                      | NA                   |
| LU-137 |      | WT1    | chr11:32456756  | C                | A    | p.Ala46Ser         | 54   | 455  | 0.12             | missense     | NM_000378              | c.C136T           | NA       | NA     | NA          | 30   | 24   | 1    | NA                      | NA                   |
| LU-141 | 2    | EGFR   | chr7:55259515   | T                | G    | p.Leu858Arg        | 512  | 1997 | 0.26             | missense     | NM_005228              | c.T2573G          | NA       | NA     | rs121434568 | 277  | 235  | 1    | Hotspot                 | GoF                  |
| LU-141 | 2    | TP53   | chr17:7579358   | C                | A    | p.Arg110Leu        | 323  | 1665 | 0.19             | missense     | NM_000546              | c.G329T           | NA       | NA     | rs11540654  | 170  | 153  | 1    | Hotspot                 | LoF                  |
| LU-143 | 2    | CTNNB1 | chr3:41266113   | C                | T    | p.Ser37Phe         | 199  | 1836 | 0.11             | missense     | NM_001904              | c.C110T           | NA       | NA     | rs121913403 | 119  | 80   | 1    | Hotspot                 | GoF                  |
| LU-143 | 2    | EGFR   | chr7:55259515   | T                | C    | p.Leu858Arg        | 894  | 1998 | 0.45             | missense     | NM_005228              | c.T2573G          | NA       | NA     | rs121434568 | 452  | 442  | 1    | Hotspot                 | GoF                  |
| LU-143 | 2    | TP53   | chr17:7579358   | C                | A    | p.Arg110Leu        | 412  | 1097 | 0.38             | missense     | NM_000546              | c.G329T           | NA       | NA     | rs11540654  | 204  | 208  | 1    | Hotspot                 | LoF                  |
| LU-144 | 3    | EGFR   | chr7:55242464   | AGGAATTAAGAGAAGC | A    | p.Glu746_Ala750del | 816  | 1975 | 0.41             | nonfsDel     | NM_005228              | c.2235_2249del    | NA       | NA     | rs121913421 | 601  | 319  | 2    | Hotspot                 | GoF                  |
| LU-144 | 3    | RET2   | chr4:106158350  | A                | C    | p.Gln1084Pro       | 729  | 1511 | 0.48             | missense     | NM_017628              | c.A3251C          | 0.002614 | 0.0027 | rs75056899  | 350  | 275  | 3    | NA                      | NA                   |
| LU-144 | 3    | TP53   | chr17:7577539   | G                | A    | p.Arg248Trp        | 175  | 1999 | 0.09             | missense     | NM_000546              | c.C742T           | NA       | NA     | rs121912651 | 88   | 87   | 2    | Hotspot                 | LoF                  |
| LU-144 | 3    | TP53   | chr17:7578212   | G                | A    | p.Arg213Ter        | 222  | 1996 | 0.11             | nonsense     | NM_000546              | c.C637T           | NA       | NA     | NA          | 103  | 119  | 1    | Deleterious             | LoF                  |
| LU-145 | 3    | EGFR   | chr7:55242464   | AGGAATTAAGAGAAGC | A    | p.Glu746_Ala750del | 158  | 1937 | 0.08             | nonfsDel     | NA                     | NA                | NA       | NA     | NA          | NA   | NA   | NA   | Hotspot                 | GoF                  |
| LU-145 | 3    | RET2   | chr4:106158350  | A                | C    | p.Gln1084Pro       | 880  | 1995 | 0.44             | missense     | NM_017628              | c.A3251C          | 0.002614 | 0.0027 | rs75056899  | 418  | 462  | 3    | NA                      | NA                   |
| LU-146 | 7    | BRCA1  | chr17:41209094  | C                | T    | p.Arg1772Gln       | 178  | 1547 | 0.12             | missense     | NM_007294              | c.G5252A          | 0.000077 | NA     | rs80357442  | 65   | 113  | 1    | NA                      | NA                   |
| LU-146 | 7    | EGFR   | chr7:55242464   | AGGAATTAAGAGAAGC | A    | p.Glu746_Ala750del | 714  | 1984 | 0.36             | nonfsDel     | NM_005228              | c.2235_2249del    | NA       | NA     | rs121913421 | 380  | 334  | 2    | Hotspot                 | GoF                  |
| LU-146 | 7    | WT1    | chr11:32421544  | A                | G    | p.Cys350Arg        | 727  | 2000 | 0.36             | missense     | NM_000378              | c.T997C           | 0.000615 | NA     | rs142059681 | 378  | 348  | 1    | NA                      | NA                   |
| LU-147 | 7    | EGFR   | chr7:55242464   | AGGAATTAAGAGAAGC | A    | p.Glu746_Ala750del | 970  | 1975 | 0.49             | nonfsDel     | NM_005228              | c.2235_2249del    | NA       | NA     | rs121913421 | 579  | 392  | 2    | Hotspot                 | GoF                  |
| LU-147 | 7    | WT1    | chr11:32421544  | A                | G    | p.Cys350Arg        | 983  | 2000 | 0.49             | missense     | NM_000378              | c.T997C           | 0.000615 | NA     | rs142059681 | 469  | 514  | 1    | NA                      | NA                   |
| LU-148 | 9    | EGFR   | chr7:55242464   | AGGAATTAAGAGAAGC | A    | p.Glu746_Ala750del | 908  | 1425 | 0.64             | nonfsDel     | NM_005228              | c.2235_2249del    | NA       | NA     | rs121913421 | 547  | 361  | 2    | Hotspot                 | GoF                  |
| LU-148 | 9    | PTEN   | chr10:89624305  | T                | A    | p.Tyr27Asn         | 902  | 1390 | 0.65             | missense     | NM_000314              | c.T79A            | NA       | NA     | NA          | 450  | 452  | 1    | NA                      | NA                   |
| LU-148 | 9    | EGFR   | chr7:55242464   | AGGAATTAAGAGAAGC | A    | p.Glu746_Ala750del | 274  | 1715 | 0.16             | nonfsDel     | NM_005228              | c.2235_2249del    | NA       | NA     | rs121913421 | 171  | 103  | 2    | Hotspot                 | GoF                  |
| LU-149 | 9    | PTEN   | chr10:89624305  | T                | A    | p.Tyr27Asn         | 230  | 1536 | 0.15             | missense     | NM_000314              | c.T79A            | NA       | NA     | NA          | 130  | 100  | 1    | NA                      | NA                   |
| LU-150 |      | BRCA2  | chr13:32937498  | G                | T    | p.A2717S           | 108  | 392  | 0.28             | missense     | NM_000059              | c.G8149T          | 0.001461 | 0.0009 | rs28897747  | 61   | 47   | 2    | NA                      | NA                   |
| LU-150 |      | CDKN2A | chr9:21971186   | G                | A    | p.R58X             | 155  | 440  | 0.35             | nonsense     | NM_000077              | c.C172T           | NA       | NA     | rs121913387 | 62   | 93   | 3    | Hotspot                 | GoF                  |
| PR-1   |      | ATM    | chr11:108178899 | G                | A    | p.D1914N           | 249  | 1999 | 0.12             | missense     | NM_000051              | c.G5740A          | NA       | NA     | NA          | 117  | 132  | 2    | NA                      | NA                   |
| PR-1   |      | FBXW7  | chr4:153268150  | G                | A    | p.Q140X            | 596  | 1994 | 0.30             | nonsense     | NM_018315              | c.C418T           | NA       | NA     | NA          | 294  | 302  | 1    | Deleterious             | LoF                  |
| PR-1   |      | FBXW7  | chr4:15332910   | G                | CAGG | p.G16delInsPG      | 965  | 1984 | 0.49             | nonfsIns     | NM_033632              | c.45_46insCCT     | 0.001757 | NA     | NA          | 489  | 476  | 1    | NA                      | NA                   |
| PR-1   |      | FOF3   | chr4:1806131    | C                | C    | p.F384L            | 466  | 970  | 0.48             | missense     | NM_000142              | c.T1150C          | 0.003614 | 0.0018 | rs17881656  | 258  | 208  | 2    | NA                      | NA                   |
| PR-2   |      | BRCA1  | chr17:41243509  | T                | C    | p.R1347G           | 1683 | 1998 | 0.84             | missense     | NM_007294              | c.A4039G          | 0.004844 | 0.0009 | rs28897689  | 887  | 796  | 3    | NA                      | NA                   |
| PR-2   |      | CCNE1  | chr19:30312636  | A                | G    | p.Y206C            | 937  | 1999 | 0.47             | missense     | NM_001238              | c.A617G           | 0.000384 | 0.0005 | rs149261350 | 507  | 430  | 1    | NA                      | NA                   |
| PR-2   |      | NOTCH1 | chr9:139400320  | G                | A    | p.A1343V           | 344  | 726  | 0.47             | missense     | NM_017617              | c.C4028T          | NA       | 0.0009 | rs183156491 | 166  | 178  | 2    | NA                      | NA                   |
| PR-2   |      | PIK3CA | chr3:178952085  | A                | G    | p.H1047R           | 425  | 2000 | 0.21             | missense     | NM_006218              | c.A3140G          | NA       | NA     | rs121913279 | 195  | 230  | 1    | Hotspot                 | GoF                  |
| PR-3   |      | BRCA1  | chr17:41246290  | C                | A    | p.D420Y            | 450  | 943  | 0.48             | missense     | NM_007294              | c.G1258T          | 0.000077 | NA     | rs80357488  | 218  | 232  |      |                         |                      |

| Sample | Pair | Gene    | Location        | Ref      | Alt | AA Change    | FAO | FDP | Variant Fraction | Variant Type | Transcript ID (RefSeq) | Nucleotide Change | ESP      | 1000G | db135       | FSAF | FSAR | HRUN | Onncomine Variant Class | Onncomine Gene Class |
|--------|------|---------|-----------------|----------|-----|--------------|-----|-----|------------------|--------------|------------------------|-------------------|----------|-------|-------------|------|------|------|-------------------------|----------------------|
| PR-13  |      | APC     | chr5:112175936  | C        | T   | p.Gln1549Ter | 26  | 427 | 0.06             | nonsense     | NM_000038              | c.C4645T          | NA       | NA    | NA          | 9    | 17   | 2    | Deleterious             | LoF                  |
| PR-13  |      | APC     | chr5:112162813  | G        | T   | p.Gln473Ter  | 17  | 216 | 0.08             | nonsense     | NM_000038              | c.C1417T          | NA       | NA    | NA          | 6    | 11   | 1    | Deleterious             | LoF                  |
| PR-13  |      | APC     | chr5:112172244  | G        | A   | p.Glu1985Lys | 7   | 70  | 0.10             | missense     | NM_000038              | c.G5953A          | NA       | NA    | NA          | 3    | 4    | 1    | NA                      | NA                   |
| PR-13  |      | APC     | chr5:112177256  | G        | A   | p.Glu1989Lys | 7   | 70  | 0.10             | missense     | NM_000038              | c.G5965A          | NA       | NA    | NA          | 3    | 4    | 1    | NA                      | NA                   |
| PR-13  |      | ATM     | chr11:108213964 | C        | T   | p.Gln2762Ter | 36  | 646 | 0.06             | nonsense     | NM_000051              | c.C8284T          | NA       | NA    | NA          | 14   | 22   | 1    | Deleterious             | LoF                  |
| PR-13  |      | ATM     | chr11:108196053 | C        | T   | p.Gln2197Ter | 59  | 985 | 0.06             | nonsense     | NM_000051              | c.C6589T          | NA       | NA    | NA          | 30   | 29   | 1    | Deleterious             | LoF                  |
| PR-13  |      | ATM     | chr11:108121656 | G        | A   | p.Tip488Ter  | 4   | 53  | 0.08             | nonsense     | NM_000051              | c.G1464A          | NA       | NA    | NA          | 2    | 2    | 2    | Deleterious             | LoF                  |
| PR-13  |      | ATM     | chr11:108124548 | C        | T   | p.His636Tyr  | 8   | 77  | 0.10             | missense     | NM_000051              | c.C1906T          | NA       | NA    | NA          | 4    | 4    | 2    | NA                      | NA                   |
| PR-13  |      | ATM     | chr11:108159775 | G        | A   | p.Ser1394Asn | 14  | 118 | 0.12             | missense     | NM_000051              | c.G4161A          | NA       | NA    | NA          | 3    | 11   | 1    | NA                      | NA                   |
| PR-13  |      | ATM     | chr11:108122628 | G        | A   | p.Gly558Arg  | 11  | 88  | 0.13             | missense     | NM_000051              | c.C1672A          | NA       | NA    | NA          | 8    | 3    | 3    | NA                      | NA                   |
| PR-13  |      | ATM     | chr11:108188124 | C        | T   | p.His2075Tyr | 11  | 88  | 0.13             | missense     | NM_000051              | c.C6223T          | NA       | NA    | NA          | 9    | 2    | 2    | NA                      | NA                   |
| PR-13  |      | ATM     | chr11:108122627 | G        | A   | p.Met557Ile  | 19  | 88  | 0.22             | missense     | NM_000051              | c.C1671A          | NA       | NA    | NA          | 8    | 11   | 3    | NA                      | NA                   |
| PR-13  |      | ATM     | chr11:108206601 | CATGAACA | C   | p.Met2728fs  | 138 | 195 | 0.71             | fsDel        | NM_000051              | c.8182_8199del    | NA       | NA    | NA          | 79   | 59   | 1    | Deleterious             | LoF                  |
| PR-13  |      | BRCA1   | chr17:41219657  | G        | A   | p.Thr1702Ile | 17  | 170 | 0.10             | missense     | NM_007294              | c.C5042T          | NA       | NA    | NA          | 6    | 11   | 1    | NA                      | NA                   |
| PR-13  |      | BRCA1   | chr17:41219685  | A        | A   | p.His1693Tyr | 19  | 168 | 0.11             | missense     | NM_007294              | c.C5014T          | NA       | NA    | NA          | 8    | 11   | 1    | NA                      | NA                   |
| PR-13  |      | BRCA1   | chr17:41244506  | C        | T   | p.Met1014Ile | 10  | 84  | 0.12             | missense     | NM_007294              | c.G3042A          | NA       | NA    | NA          | 2    | 8    | 3    | NA                      | NA                   |
| PR-13  |      | BRCA1   | chr17:41219648  | G        | A   | p.Thr1705Ile | 37  | 172 | 0.22             | missense     | NM_007294              | c.C5051T          | NA       | NA    | NA          | 19   | 18   | 1    | NA                      | NA                   |
| PR-13  |      | BRCA2   | chr13:32906909  | G        | A   | p.Glu432Lys  | 15  | 149 | 0.10             | missense     | NM_000059              | c.G1294A          | NA       | NA    | NA          | 6    | 9    | 1    | NA                      | NA                   |
| PR-13  |      | BRCA2   | chr13:32912535  | G        | A   | p.Cys1348Tyr | 8   | 78  | 0.10             | missense     | NM_000059              | c.G4043A          | NA       | NA    | NA          | 4    | 4    | 1    | NA                      | NA                   |
| PR-13  |      | BRCA2   | chr13:32893291  | G        | A   | p.Glu49Lys   | 14  | 134 | 0.10             | missense     | NM_000059              | c.G145A           | NA       | NA    | NA          | 5    | 9    | 1    | NA                      | NA                   |
| PR-13  |      | BRCA2   | chr13:32944692  | C        | T   | p.Gln2829Ter | 12  | 114 | 0.11             | nonsense     | NM_000059              | c.C8485T          | NA       | NA    | rs80359099  | 2    | 10   | 1    | Deleterious             | LoF                  |
| PR-13  |      | BRCA2   | chr13:32911877  | C        | T   | p.Gln1129Ter | 8   | 75  | 0.11             | nonsense     | NM_000059              | c.C3385T          | NA       | NA    | NA          | 2    | 6    | 1    | Deleterious             | LoF                  |
| PR-13  |      | BRCA2   | chr13:32972303  | C        | T   | p.Ser3218Phe | 7   | 61  | 0.11             | missense     | NM_000059              | c.C9653T          | NA       | NA    | NA          | 3    | 4    | 1    | NA                      | NA                   |
| PR-13  |      | BRCA2   | chr13:32914274  | G        | A   | p.Glu1928Lys | 8   | 68  | 0.12             | missense     | NM_000059              | c.G5782A          | NA       | NA    | rs56253082  | 5    | 3    | 1    | NA                      | NA                   |
| PR-13  |      | BRCA2   | chr13:32911743  | G        | A   | p.Ser1084Asn | 6   | 49  | 0.12             | missense     | NM_000059              | c.G3251A          | NA       | NA    | NA          | 1    | 5    | 1    | NA                      | NA                   |
| PR-13  |      | BRCA2   | chr13:32900287  | G        | A   | p.Val159Met  | 9   | 73  | 0.12             | missense     | NM_000059              | c.G475A           | NA       | NA    | rs80358702  | 6    | 3    | 2    | NA                      | NA                   |
| PR-13  |      | BRCA2   | chr13:32893246  | G        | A   | p.Glu34Lys   | 17  | 135 | 0.13             | missense     | NM_000059              | c.G100A           | NA       | NA    | NA          | 11   | 6    | 1    | NA                      | NA                   |
| PR-13  |      | BRCA2   | chr13:32911718  | G        | A   | p.Val1076Ile | 7   | 51  | 0.14             | missense     | NM_000059              | c.G3226A          | NA       | NA    | NA          | 2    | 5    | 1    | NA                      | NA                   |
| PR-13  |      | CCNE1   | chr19:30312639  | C        | T   | p.Pro207Leu  | 70  | 611 | 0.11             | missense     | NM_001238              | c.C620T           | NA       | NA    | NA          | 37   | 33   | 2    | NA                      | NA                   |
| PR-13  |      | CDH1    | chr16:68842647  | C        | T   | p.Gln195Ter  | 10  | 182 | 0.05             | nonsense     | NM_004360              | c.C583T           | NA       | NA    | NA          | 7    | 3    | 2    | Deleterious             | LoF                  |
| PR-13  |      | CDH1    | chr16:68849556  | G        | A   | p.Val487Met  | 7   | 56  | 0.13             | missense     | NM_004360              | c.G1459A          | NA       | NA    | NA          | 4    | 3    | 1    | NA                      | NA                   |
| PR-13  |      | CDH1    | chr16:68846080  | C        | T   | p.Gln351Ter  | 23  | 160 | 0.14             | nonsense     | NM_004360              | c.C1051T          | NA       | NA    | NA          | 14   | 9    | 1    | Deleterious             | LoF                  |
| PR-13  |      | CDK4    | chr12:58142358  | G        | A   | p.Arg288Ter  | 11  | 201 | 0.05             | nonsense     | NM_000075              | c.C862T           | NA       | NA    | NA          | 7    | 4    | 1    | NA                      | NA                   |
| PR-13  |      | CDK4    | chr12:58145367  | C        | T   | p.Gly45Asp   | 7   | 123 | 0.06             | missense     | NM_000075              | c.G134A           | NA       | NA    | NA          | 5    | 2    | 2    | NA                      | NA                   |
| PR-13  |      | CDK4    | chr12:58145361  | C        | T   | p.Gly47Glu   | 7   | 118 | 0.06             | missense     | NM_000075              | c.G140A           | NA       | NA    | NA          | 2    | 5    | 2    | NA                      | NA                   |
| PR-13  |      | CDK4    | chr12:58145448  | C        | T   | p.Gly18Glu   | 8   | 127 | 0.06             | missense     | NM_000075              | c.G53A            | NA       | NA    | NA          | 5    | 3    | 3    | NA                      | NA                   |
| PR-13  |      | CDK4    | chr12:58145403  | G        | A   | p.Ala33Val   | 10  | 129 | 0.08             | missense     | NM_000075              | c.C98T            | NA       | NA    | NA          | 4    | 6    | 3    | NA                      | NA                   |
| PR-13  |      | CDKN2A  | chr9:21971148   | G        | A   | p.Q85X       | 27  | 262 | 0.10             | nonsense     | NM_058195              | c.C253T           | NA       | NA    | NA          | 9    | 18   | 3    | NA                      | NA                   |
| PR-13  |      | CSNK2A1 | chr20:470447    | G        | A   | p.His234Tyr  | 23  | 214 | 0.11             | missense     | NM_001895              | c.C700T           | NA       | NA    | NA          | 14   | 9    | 2    | NA                      | NA                   |
| PR-13  |      | CTNNB3  | chr3:41266067   | G        | A   | p.Val21Ile   | 20  | 354 | 0.06             | missense     | NM_001904              | c.G64A            | NA       | NA    | NA          | 10   | 10   | 1    | Hotspot                 | GoF                  |
| PR-13  |      | DNMT3A  | chr2:25463266   | G        | A   | p.Pro743Ser  | 8   | 141 | 0.06             | missense     | NM_022552              | c.C2227T          | NA       | NA    | NA          | 6    | 2    | 3    | NA                      | NA                   |
| PR-13  |      | DNMT3A  | chr2:25463287   | G        | A   | p.Arg736Cys  | 9   | 146 | 0.06             | missense     | NM_022552              | c.C2206T          | NA       | NA    | NA          | 6    | 3    | 2    | Hotspot                 | GoF                  |
| PR-13  |      | EGFR    | chr7:55259482   | C        | T   | p.Thr847Ile  | 31  | 522 | 0.06             | missense     | NM_005228              | c.C2540T          | NA       | NA    | NA          | 13   | 18   | 1    | Hotspot                 | GoF                  |
| PR-13  |      | EGFR    | chr7:55220290   | C        | T   | p.Ser227Phe  | 19  | 309 | 0.06             | missense     | NM_005228              | c.C680T           | NA       | NA    | NA          | 18   | 11   | 5    | NA                      | NA                   |
| PR-13  |      | EGFR    | chr7:55259460   | G        | A   | p.Ala840Thr  | 33  | 520 | 0.06             | missense     | NM_005228              | c.G2518A          | 0.000077 | NA    | rs143884981 | 7    | 16   | 1    | NA                      | NA                   |
| PR-13  |      | EGFR    | chr7:55220254   | G        | A   | p.Cys215Tyr  | 22  | 312 | 0.07             | missense     | NM_005228              | c.G644A           | NA       | NA    | NA          | 9    | 13   | 1    | NA                      | NA                   |
| PR-13  |      | EGFR    | chr7:55242457   | G        | T   | p.Ala743Ser  | 7   | 96  | 0.07             | missense     | NM_005228              | c.G2227T          | NA       | NA    | NA          | 5    | 2    | 1    | Hotspot                 | GoF                  |
| PR-13  |      | EGFR    | chr7:55233009   | G        | A   | p.Asp587Asn  | 10  | 133 | 0.08             | missense     | NM_005228              | c.G1759A          | NA       | NA    | NA          | 7    | 3    | 1    | NA                      | NA                   |
| PR-13  |      | EGFR    | chr7:55233018   | C        | T   | p.His590Tyr  | 10  | 133 | 0.08             | missense     | NM_005228              | c.C1768T          | NA       | NA    | NA          | 5    | 5    | 5    | NA                      | NA                   |
| PR-13  |      | EGFR    | chr7:55259511   | G        | A   | p.Gly857Arg  | 40  | 519 | 0.08             | missense     | NM_005228              | c.G2569A          | NA       | NA    | NA          | 17   | 23   | 3    | Hotspot                 | GoF                  |
| PR-13  |      | EGFR    | chr7:55273260   | G        | A   | p.Ala1195Thr | 17  | 213 | 0.08             | missense     | NM_005228              | c.G3583A          | NA       | NA    | NA          | 12   | 5    | 1    | NA                      | NA                   |
| PR-13  |      | EGFR    | chr7:55220298   | G        | A   | p.Asp230Asn  | 28  | 297 | 0.09             | missense     | NM_005228              | c.G688A           | NA       | NA    | NA          | 17   | 11   | 1    | NA                      | NA                   |
| PR-13  |      | EGFR    | chr7:55242485   | C        | T   | p.S752F      | 11  | 96  | 0.11             | missense     | NM_005228              | c.C2255T          | NA       | NA    | NA          | 8    | 3    | 1    | NA                      | NA                   |
| PR-13  |      | EGFR    | chr7:55242488   | C        | T   | p.P753L      | 11  | 96  | 0.11             | missense     | NM_005228              | c.C2258T          | NA       | NA    | NA          | 8    | 3    | 2    | NA                      | NA                   |
| PR-13  |      | EGFR    | chr7:55241701   | G        | A   | p.Val1717Met | 8   | 66  | 0.12             | missense     | NM_005228              | c.G2149A          | NA       | NA    | NA          | 5    | 3    | 1    | NA                      | NA                   |
| PR-13  |      | EGFR    | chr7:55249089   | G        | A   | p.Gly796Asp  | 18  | 113 | 0.16             | missense     | NM_005228              | c.G2387A          | NA       | NA    | NA          | 12   | 6    | 2    | Hotspot                 | GoF                  |
| PR-13  |      | ERBB2   | chr17:37861332  | G        | A   | p.Val842Ile  | 10  | 181 | 0.06             | missense     | NM_004448              | c.G2524A          | NA       | NA    | NA          | 1    | 9    | 1    | Hotspot                 | GoF                  |
| PR-13  |      | ERBB2   | chr17:37866692  | G        | A   | p.Gly287Ser  | 10  | 176 | 0.06             | missense     | NM_004448              | c.G559A           | NA       | NA    | NA          | 5    | 5    | 3    | NA                      | NA                   |
| PR-13  |      | ERBB2   | chr17:37880183  | G        | A   | p.Gly743Arg  | 8   | 106 | 0.08             | missense     | NM_004448              | c.C2227A          | NA       | NA    | NA          | 6    | 2    | 4    | NA                      | NA                   |
| PR-13  |      | ERBB4   | chr2:212488718  | G        | A   | p.Arg711Cys  | 4   | 60  | 0.07             | missense     | NM_005235              | c.C2131T          | NA       | NA    | NA          | 1    | 3    | 1    | Hotspot                 | GoF                  |
| PR-13  |      | ESR1    | chr6:152332886  | C        | T   | p.His398Tyr  | 21  | 385 | 0.05             | missense     | NM_000125              | c.C1192T          | NA       | NA    | NA          | 10   | 11   | 1    | NA                      | NA                   |
| PR-13  |      | ESR1    | chr6:152332858  | G        | A   | p.Met388Ile  | 25  | 440 | 0.06             | missense     | NM_000125              | c.G1164A          | NA       | NA    | NA          | 13   | 12   | 1    | NA                      | NA                   |
| PR-13  |      | ESR1    | chr6:152419997  | G        | A   | p.Glu562Lys  | 7   | 69  | 0.10             | missense     | NM_000125              | c.G1684A          | NA       | NA    | NA          | 2    | 5    | 2    | NA                      | NA                   |
| PR-13  |      | FBXW7   | chr4:153259039  | C        | T   | p.Ser259Asn  | 17  | 152 | 0.11             | missense     | NM_018315              | c.G536A           | NA       | NA    | NA          | 6    | 11   | 1    | NA                      | NA                   |
| PR-13  |      | FBXW7   | chr4:153332505  | G        | T   | p.Asp151Asn  | 7   | 62  | 0.11             | missense     | NM_033632              | c.G451A           | NA       | NA    | NA          | 5    | 2    | 2    | NA                      | NA                   |
| PR-13  |      | FGFR1   | chr8:38287202   | C        | A   | p.Ser152Leu  | 7   | 100 | 0.07             | missense     | NM_015850              | c.C356T           | NA       | NA    | NA          | 3    | 4    | 1    | NA                      | NA                   |
| PR-13  |      | FGFR1   | chr8:38271471   | C        | T   | p.Asp784Asn  | 16  | 173 | 0.09             | missense     | NM_015850              | c.G2251A          | NA       | NA    | NA          | 4    | 12   | 1    | NA                      | NA                   |
| PR-13  |      | FGFR1   | chr8:38283649   | C        | G   | p.Asp277His  | 11  | 109 | 0.10             | missense     | NM_015850              | c.G730C           | NA       | NA    | NA          | 4    | 7    | 2    | NA                      | NA                   |
| PR-13  |      | FGFR1   | chr8:38271532   | C        | T   | p.Met763Ile  | 21  | 177 | 0.12             | missense     | NM_015850              | c.G2190A          | NA       | NA    | NA          | 9    | 12   | 1    | NA                      | NA                   |
| PR-13  |      | FGFR1   | chr8:38285490   | C        | T   | p.Tip221Ter  | 31  | 227 | 0.14             | nonsense     | NM_015850              | c.G564A           | NA       | NA    | NA          | 14   | 17   | 2    | NA                      | NA                   |
| PR-13  |      | FGFR2   | chr10:123274798 | C        | T   | p.Asp374Asn  | 22  | 282 | 0.08             | missense     | NM_000142              | c.G1120A          | NA       | NA    | NA          | 10   | 12   | 1    | NA                      | NA                   |
| PR-13  |      | FGFR2   | chr10:123278214 | C        | T   | p.V357I      | 23  | 224 | 0.10             | missense     | NM_022970              | c.G1069A          | NA       | NA    | NA          | 10   | 13   | 1    | NA                      | NA                   |
| PR-13  |      | FGFR3   | chr4:1806555    | C        | T   | p.Ser424Phe  | 1   |     |                  |              |                        |                   |          |       |             |      |      |      |                         |                      |

| Sample | Pair | Gene   | Location       | Ref | Alt | AA Change    | FAO | FDP | Variant Fraction | Variant Type | Transcript ID (RefSeq) | Nucleotide Change  | ESP      | 1000G  | db135       | FSAF | FSAR | HRUN | Onncomine Variant Class | Onncomine Gene Class |
|--------|------|--------|----------------|-----|-----|--------------|-----|-----|------------------|--------------|------------------------|--------------------|----------|--------|-------------|------|------|------|-------------------------|----------------------|
| PR-13  |      | IDH1   | chr2:209113325 | G   | A   | p.Ala61Val   | 10  | 187 | 0.05             | missense     | NM_005896              | c.C182T            | NA       | NA     | NA          | 6    | 4    | 1    | NA                      | NA                   |
| PR-13  |      | IDH1   | chr2:209108323 | G   | T   | p.Gly176Ser  | 27  | 166 | 0.16             | missense     | NM_005896              | c.G526A            | NA       | NA     | NA          | 11   | 16   | 2    | NA                      | NA                   |
| PR-13  |      | IDH2   | chr15:90631914 | C   | T   | p.Val147Ile  | 35  | 607 | 0.06             | missense     | NM_002168              | c.G439A            | NA       | NA     | NA          | 18   | 17   | 1    | NA                      | NA                   |
| PR-13  |      | JAK1   | chr1:65312368  | C   | T   | p.Val651Met  | 18  | 286 | 0.06             | missense     | NM_002227              | c.G1951A           | 0.001637 | 0.0014 | rs149968614 | 10   | 17   | 1    | NA                      | NA                   |
| PR-13  |      | JAK1   | chr1:65310502  | C   | T   | p.Ser729Asn  | 8   | 92  | 0.09             | missense     | NM_002227              | c.G2186A           | NA       | NA     | NA          | 4    | 4    | 1    | NA                      | NA                   |
| PR-13  |      | JAK3   | chr19:17945946 | G   | T   | p.Pro665Thr  | 16  | 314 | 0.05             | missense     | NM_000215              | c.C1993A           | NA       | NA     | NA          | 7    | 9    | 3    | NA                      | NA                   |
| PR-13  |      | JAK3   | chr19:17945916 | T   | C   | p.Ser675Gly  | 16  | 281 | 0.06             | missense     | NM_000215              | c.A2023G           | NA       | NA     | NA          | 9    | 7    | 1    | NA                      | NA                   |
| PR-13  |      | JAK3   | chr19:17945997 | G   | T   | p.Val648Ile  | 28  | 356 | 0.08             | missense     | NM_000215              | c.G1942A           | NA       | NA     | NA          | 14   | 7    | 1    | NA                      | NA                   |
| PR-13  |      | JAK3   | chr19:17945967 | C   | T   | p.Glu658Lys  | 35  | 361 | 0.10             | missense     | NM_000215              | c.G1972A           | NA       | NA     | NA          | 9    | 26   | 3    | NA                      | NA                   |
| PR-13  |      | KIT    | chr4:55594257  | C   | T   | p.Val654Met  | 3   | 53  | 0.06             | missense     | NM_000222              | c.G1960A           | NA       | NA     | NA          | 3    | 0    | 1    | Hotspot                 | GoF                  |
| PR-13  |      | KIT    | chr4:55592144  | G   | A   | p.Glu490Lys  | 9   | 158 | 0.06             | missense     | NM_000222              | c.G1468A           | NA       | NA     | NA          | 6    | 3    | 1    | NA                      | NA                   |
| PR-13  |      | KIT    | chr4:55597538  | C   | T   | p.Ser729Phe  | 10  | 164 | 0.06             | missense     | NM_000222              | c.C2186T           | NA       | NA     | NA          | 8    | 2    | 1    | NA                      | NA                   |
| PR-13  |      | KIT    | chr4:55561762  | G   | A   | p.Gly51Asp   | 9   | 129 | 0.07             | missense     | NM_000222              | c.G152A            | NA       | NA     | NA          | 4    | 5    | 3    | NA                      | NA                   |
| PR-13  |      | KIT    | chr4:55592169  | G   | A   | p.Gly498Asp  | 12  | 165 | 0.07             | missense     | NM_000222              | c.G1493A           | NA       | NA     | NA          | 8    | 4    | 3    | NA                      | NA                   |
| PR-13  |      | KIT    | chr4:55561807  | G   | A   | p.Trp66Ter   | 11  | 125 | 0.09             | nonsense     | NM_000222              | c.G197A            | NA       | NA     | NA          | 3    | 8    | 2    | NA                      | NA                   |
| PR-13  |      | KIT    | chr4:55561756  | G   | A   | p.Arg49His   | 12  | 129 | 0.09             | missense     | NM_000222              | c.G146A            | 0.000077 | NA     | NA          | 8    | 4    | 1    | Hotspot                 | GoF                  |
| PR-13  |      | KIT    | chr4:55594245  | C   | T   | p.His650Tyr  | 8   | 53  | 0.15             | missense     | NM_000222              | c.C1948T           | NA       | NA     | NA          | 4    | 4    | 1    | NA                      | NA                   |
| PR-13  |      | KNSTRN | chr15:40675107 | C   | T   | p.Ser24Phe   | 6   | 53  | 0.11             | missense     | NA                     | NA                 | NA       | NA     | NA          | NA   | NA   | NA   | Hotspot                 | GoF                  |
| PR-13  |      | KNSTRN | chr15:40675041 | C   | T   | p.Ala2Val    | 6   | 50  | 0.12             | missense     | NM_033286              | c.C5T              | NA       | NA     | NA          | 4    | 2    | 1    | NA                      | NA                   |
| PR-13  |      | KRAS   | chr12:25378665 | C   | T   | p.Met111Ile  | 7   | 124 | 0.06             | missense     | NM_004985              | c.G333A            | NA       | NA     | NA          | 2    | 5    | 2    | NA                      | NA                   |
| PR-13  |      | MAP2K1 | chr15:66727510 | G   | A   | p.Ala76Thr   | 8   | 152 | 0.05             | missense     | NM_002755              | c.G226A            | NA       | NA     | NA          | 3    | 5    | 5    | NA                      | NA                   |
| PR-13  |      | MAP2K1 | chr15:66729163 | C   | T   | p.Pro124Leu  | 9   | 146 | 0.06             | missense     | NM_002755              | c.C371T            | NA       | NA     | NA          | 5    | 4    | 2    | Hotspot                 | GoF                  |
| PR-13  |      | MAP2K1 | chr15:66729160 | C   | T   | p.Ser123Phe  | 12  | 140 | 0.09             | missense     | NM_002755              | c.C368T            | NA       | NA     | NA          | 5    | 7    | 1    | NA                      | NA                   |
| PR-13  |      | MAP2K1 | chr15:66774102 | C   | T   | p.Pro193Leu  | 16  | 138 | 0.12             | missense     | NM_002755              | c.C578T            | NA       | NA     | NA          | 11   | 5    | 3    | NA                      | NA                   |
| PR-13  |      | MAPK1  | chr22:22127167 | G   | A   | p.Asp321Asn  | 25  | 429 | 0.06             | missense     | NM_002745              | c.G961A            | NA       | NA     | NA          | 11   | 14   | 1    | NA                      | NA                   |
| PR-13  |      | MAPK1  | chr22:22127200 | G   | A   | p.His310Tyr  | 29  | 408 | 0.07             | missense     | NM_002745              | c.C928T            | NA       | NA     | NA          | 10   | 11   | 3    | NA                      | NA                   |
| PR-13  |      | MDM2   | chr12:69233400 | G   | A   | p.Arg422Lys  | 21  | 418 | 0.05             | missense     | NM_002392              | c.G1265A           | NA       | NA     | NA          | 10   | 19   | 3    | NA                      | NA                   |
| PR-13  |      | MDM2   | chr12:69233132 | G   | T   | p.Glu333Ter  | 7   | 106 | 0.07             | nonsense     | NM_002392              | c.G997T            | NA       | NA     | NA          | 5    | 2    | 1    | NA                      | NA                   |
| PR-13  |      | MPL    | chr1:43815018  | C   | T   | p.Pro518Leu  | 18  | 329 | 0.05             | missense     | NM_005373              | c.C1553T           | NA       | NA     | NA          | 10   | 8    | 2    | NA                      | NA                   |
| PR-13  |      | MSH2   | chr2:47707939  | C   | T   | p.Gln855Ter  | 6   | 60  | 0.10             | nonsense     | NM_000251              | c.C2563T           | NA       | NA     | NA          | 1    | 5    | 1    | Deleterious             | LoF                  |
| PR-13  |      | MSH2   | chr2:47693814  | C   | T   | p.Gln510Ter  | 19  | 180 | 0.11             | nonsense     | NM_000251              | c.C1528T           | NA       | NA     | NA          | 7    | 12   | 1    | Deleterious             | LoF                  |
| PR-13  |      | MSH2   | chr2:47707978  | C   | T   | p.Pro868Ser  | 7   | 62  | 0.11             | missense     | NM_000251              | c.C2602T           | NA       | NA     | NA          | 1    | 6    | 2    | NA                      | NA                   |
| PR-13  |      | MSH2   | chr2:47672753  | C   | T   | p.Ser448Phe  | 8   | 65  | 0.12             | missense     | NM_000251              | c.C1343T           | NA       | NA     | NA          | 5    | 3    | 2    | NA                      | NA                   |
| PR-13  |      | MSH2   | chr2:47672797  | A   | A   | NA           | 15  | 65  | 0.2308           | splice       | NM_000251              | exon8:c.1386+1G>A  | NA       | NA     | NA          | 6    | 9    | 2    | NA                      | NA                   |
| PR-13  |      | MSH2   | chr2:47708011  | G   | A   | NA           | 7   | 63  | 0.1111           | splice       | NM_000251              | exon15:c.2634+1G>A | NA       | NA     | NA          | 4    | 3    | 2    | NA                      | NA                   |
| PR-13  |      | MTOR   | chr1:11217277  | C   | T   | p.Met1467Ile | 23  | 248 | 0.09             | missense     | NM_004958              | c.G4401A           | NA       | NA     | NA          | 9    | 14   | 2    | NA                      | NA                   |
| PR-13  |      | MTOR   | chr1:11190774  | G   | A   | p.Gln1809Ter | 9   | 50  | 0.18             | nonsense     | NM_004958              | c.C5425T           | NA       | NA     | NA          | 4    | 5    | 2    | NA                      | NA                   |
| PR-13  |      | MTOR   | chr1:11190833  | G   | A   | p.Ala1789Val | 9   | 50  | 0.18             | missense     | NM_004958              | c.C5366T           | NA       | NA     | NA          | 4    | 5    | 2    | NA                      | NA                   |
| PR-13  |      | MYCL   | chr1:40363564  | G   | T   | p.Arg222Gln  | 11  | 85  | 0.13             | missense     | NM_001033081           | c.G575A            | NA       | NA     | NA          | 5    | 6    | 1    | NA                      | NA                   |
| PR-13  |      | MYCN   | chr2:16085965  | G   | A   | p.Glu381Lys  | 7   | 93  | 0.08             | missense     | NM_005378              | c.G1141A           | NA       | NA     | NA          | 3    | 4    | 1    | NA                      | NA                   |
| PR-13  |      | MYCN   | chr2:16085930  | G   | A   | p.Ser369Asn  | 7   | 92  | 0.08             | missense     | NM_005378              | c.G1106A           | NA       | NA     | NA          | 3    | 4    | 1    | NA                      | NA                   |
| PR-13  |      | MYCN   | chr2:16085992  | G   | A   | p.Glu390Lys  | 9   | 93  | 0.10             | missense     | NM_005378              | c.C1168A           | NA       | NA     | NA          | 4    | 5    | 2    | NA                      | NA                   |
| PR-13  |      | MYCN   | chr2:16085924  | G   | T   | p.Ala367Val  | 9   | 92  | 0.10             | missense     | NM_005378              | c.C1100T           | NA       | NA     | NA          | 7    | 2    | 1    | NA                      | NA                   |
| PR-13  |      | MYD88  | chr3:38182041  | G   | A   | p.Ser222Asn  | 8   | 142 | 0.06             | missense     | NM_002468              | c.G665A            | NA       | NA     | NA          | 6    | 2    | 1    | NA                      | NA                   |
| PR-13  |      | NF1    | chr17:29527559 | G   | A   | p.Trp336Ter  | 10  | 191 | 0.05             | nonsense     | NM_000267              | c.G1008A           | NA       | NA     | NA          | 5    | 5    | 3    | Deleterious             | LoF                  |
| PR-13  |      | NF1    | chr17:29528441 | G   | T   | p.Gln400Ter  | 16  | 282 | 0.06             | nonsense     | NM_000267              | c.C1198T           | NA       | NA     | NA          | 10   | 6    | 1    | Deleterious             | LoF                  |
| PR-13  |      | NF1    | chr17:29664881 | G   | A   | p.Trp229Ter  | 18  | 193 | 0.09             | nonsense     | NM_000267              | c.G6624A           | NA       | NA     | NA          | 10   | 8    | 2    | Deleterious             | LoF                  |
| PR-13  |      | NF1    | chr17:29663405 | G   | A   | p.Gly2021Ser | 10  | 98  | 0.10             | missense     | NM_000267              | c.G5998A           | NA       | NA     | NA          | 6    | 4    | 2    | NA                      | NA                   |
| PR-13  |      | NF1    | chr17:29664598 | G   | A   | p.Glu2214Lys | 10  | 89  | 0.11             | missense     | NM_000267              | c.G6577A           | NA       | NA     | NA          | 2    | 8    | 2    | NA                      | NA                   |
| PR-13  |      | NF1    | chr17:29588794 | G   | T   | p.Pro1548Leu | 6   | 52  | 0.12             | missense     | NM_000267              | c.C4580T           | NA       | NA     | NA          | 2    | 4    | 2    | NA                      | NA                   |
| PR-13  |      | NF2    | chr22:30032805 | C   | A   | p.Trp60Ter   | 37  | 722 | 0.05             | nonsense     | NM_000268              | c.G180A            | NA       | NA     | NA          | 23   | 14   | 2    | Deleterious             | LoF                  |
| PR-13  |      | NF2    | chr22:30054233 | G   | A   | p.Val219Met  | 12  | 232 | 0.05             | missense     | NM_000268              | c.G665A            | NA       | NA     | NA          | 11   | 1    | 1    | Hotspot                 | LoF                  |
| PR-13  |      | NF2    | chr22:30054186 | C   | T   | p.Ala203Val  | 9   | 80  | 0.11             | missense     | NM_000268              | c.C608T            | NA       | NA     | NA          | 4    | 5    | 1    | NA                      | NA                   |
| PR-13  |      | NF2    | chr22:30074273 | C   | T   | p.Thr512Ile  | 15  | 115 | 0.13             | missense     | NM_000268              | c.C1535T           | NA       | NA     | NA          | 9    | 6    | 1    | NA                      | NA                   |
| PR-13  |      | NFE2L2 | chr2:17809828  | G   | A   | p.Gln73Ter   | 9   | 126 | 0.07             | nonsense     | NM_006164              | c.C217T            | NA       | NA     | NA          | 5    | 4    | 1    | NA                      | NA                   |
| PR-13  |      | NFE2L2 | chr2:17809803  | C   | T   | p.Gly61Asp   | 11  | 126 | 0.09             | missense     | NM_006164              | c.G242A            | NA       | NA     | NA          | 5    | 6    | 2    | Hotspot                 | GoF                  |
| PR-13  |      | NOTCH1 | chr9:139412613 | G   | A   | p.Gln411Ter  | 7   | 127 | 0.06             | nonsense     | NM_017617              | c.C1231T           | NA       | NA     | NA          | 4    | 3    | 2    | Deleterious             | LoF                  |
| PR-13  |      | NOTCH1 | chr9:139396302 | G   | A   | p.Gln1846Ter | 5   | 54  | 0.09             | nonsense     | NM_017617              | c.C5536T           | NA       | NA     | NA          | 1    | 4    | 1    | Deleterious             | LoF                  |
| PR-13  |      | NOTCH1 | chr9:139391362 | G   | A   | p.Pro2277Ser | 7   | 65  | 0.11             | missense     | NM_017617              | c.C6829T           | NA       | NA     | NA          | 1    | 6    | 2    | NA                      | NA                   |
| PR-13  |      | NOTCH1 | chr9:139411768 | C   | T   | p.Arg504His  | 9   | 77  | 0.12             | missense     | NM_017617              | c.G1511A           | NA       | NA     | NA          | 3    | 6    | 1    | NA                      | NA                   |
| PR-13  |      | NOTCH1 | chr9:139409098 | C   | T   | p.Gly691Ser  | 8   | 65  | 0.12             | missense     | NM_017617              | c.G2071A           | NA       | NA     | NA          | 5    | 3    | 5    | NA                      | NA                   |
| PR-13  |      | NOTCH1 | chr9:139408993 | C   | T   | p.Val726Ile  | 8   | 64  | 0.13             | missense     | NM_017617              | c.G2176A           | NA       | NA     | NA          | 4    | 4    | 1    | NA                      | NA                   |
| PR-13  |      | NOTCH1 | chr9:139401261 | C   | T   | p.Glu1270Lys | 11  | 87  | 0.13             | missense     | NM_017617              | c.G3808A           | NA       | NA     | NA          | 8    | 3    | 1    | NA                      | NA                   |
| PR-13  |      | NOTCH1 | chr9:139401004 | C   | T   | p.Arg1330His | 13  | 67  | 0.19             | missense     | NM_017617              | c.G3989A           | NA       | NA     | NA          | 5    | 8    | 1    | NA                      | NA                   |
| PR-13  |      | PDGFRA | chr4:55133763  | G   | A   | p.Ala326Thr  | 6   | 105 | 0.06             | missense     | NM_006206              | c.G976A            | NA       | NA     | NA          | 3    | 3    | 1    | NA                      | NA                   |
| PR-13  |      | PDGFRA | chr4:55144143  | G   | A   | p.Val658Ile  | 35  | 505 | 0.07             | missense     | NM_006206              | c.G1972A           | NA       | NA     | NA          | 16   | 19   | 1    | NA                      | NA                   |
| PR-13  |      | PIK3CA | chr3:178952074 | G   | A   | p.Met1043Ile | 13  | 259 | 0.05             | missense     | NA                     | NA                 | NA       | NA     | NA          | NA   | NA   | NA   | Hotspot                 | GoF                  |
| PR-13  |      | PIK3CA | chr3:178936091 | G   | A   | p.Glu545Lys  | 41  | 807 | 0.05             | missense     | NM_006218              | c.G1633A           | NA       | NA     | rs104886003 | 17   | 24   | 1    | Hotspot                 | GoF                  |
| PR-13  |      | PIK3CA | chr3:178936097 | G   | A   | p.Glu547Lys  | 41  | 806 | 0.05             | missense     | NM_006218              | c.G1639A           | NA       | NA     | NA          | 17   | 24   | 2    | Hotspot                 | GoF                  |
| PR-13  |      | PIK3CA | chr3:178948080 | G   | A   | p.Arg951His  | 7   | 123 | 0.06             | missense     | NM_006218              | c.G2852A           | NA       | NA     | NA          | 3    | 4    | 1    | NA                      | NA                   |
| PR-13  |      | PIK3CA | chr3:178916767 | G   | A   | p.Glu52Lys   | 11  | 178 | 0.06             | missense     | NM_006218              | c.G154A            | NA       | NA     | NA          | 9    | 2    | 1    | NA                      | NA                   |
| PR-13  |      | PIK3CA | chr3:178928022 | G   | A   | p.Asp434Asn  | 11  | 178 | 0.06             | missense     | NM_006218              | c.G1300A           | NA       | NA     | NA          | 5    | 6    | 1    | NA                      | NA                   |
| PR-13  |      | PIK3CA | chr3:178923232 | G   | A   | p.Gly364Glu  | 10  | 149 | 0.07             | missense     | NM_006218              | c.G1091A           | NA       | NA     | NA          | 7    | 3    | 2    | Hotspot                 | GoF                  |
| PR-1   |      |        |                |     |     |              |     |     |                  |              |                        |                    |          |        |             |      |      |      |                         |                      |



| Sample | Pair | Gene    | Location        | Ref          | Alt | AA Change                | FAO  | FDP  | Variant Fraction | Variant Type      | Transcript ID (RefSeq) | Nucleotide Change    | ESP      | 1000G  | db135       | FSAF | FSAR | HRUN | Onncomine Variant Class | Onncomine Gene Class |
|--------|------|---------|-----------------|--------------|-----|--------------------------|------|------|------------------|-------------------|------------------------|----------------------|----------|--------|-------------|------|------|------|-------------------------|----------------------|
| PR-13  |      | PTPN11  | chr12:112926930 | C            | A   | p.Ala517Glu              | 8    | 64   | 0.13             | missense          | NM_002834              | c.C1550A             | NA       | NA     | NA          | 5    | 3    | 1    | NA                      | NA                   |
| PR-13  |      | PTPN11  | chr12:112888165 | G            | A   | p.Asp61Asn               | 29   | 206  | 0.14             | missense          | NM_002834              | c.G181A              | NA       | NA     | NA          | 11   | 18   | 1    | Hotspot                 | GoF                  |
| PR-13  |      | RB1     | chr13:48916747  | C            | T   | p.Gln93Ter               | 10   | 173  | 0.06             | nonsense          | NM_000321              | c.C277T              | NA       | NA     | NA          | 8    | 2    | 1    | Deleterious             | LoF                  |
| PR-13  |      | RHEB    | chr7:151188044  | G            | A   | p.Pro37Ser               | 14   | 239  | 0.06             | missense          | NM_005614              | c.C109T              | NA       | NA     | NA          | 8    | 6    | 2    | NA                      | NA                   |
| PR-13  |      | RPS6KB1 | chr17:58024031  | C            | T   | p.Thr487Ile              | 7    | 97   | 0.07             | missense          | NM_003161              | c.C1460T             | NA       | NA     | NA          | 3    | 4    | 1    | NA                      | NA                   |
| PR-13  |      | SMARCB1 | chr22:24159074  | C            | C   | p.Pro249Leu              | 9    | 64   | 0.14             | missense          | NM_003073              | c.C746T              | NA       | NA     | NA          | 7    | 2    | 4    | NA                      | NA                   |
| PR-13  |      | SOX2    | chr3:181430885  | C            | T   | p.Ser246Phe              | 17   | 281  | 0.06             | missense          | NM_003106              | c.C737T              | NA       | NA     | NA          | 11   | 6    | 2    | NA                      | NA                   |
| PR-13  |      | TET2    | chr4:106193787  | G            | A   | p.Val1417Ile             | 11   | 202  | 0.05             | missense          | NM_001127208           | c.G4249A             | NA       | NA     | NA          | 4    | 7    | 1    | Hotspot                 | LoF                  |
| PR-13  |      | TET2    | chr4:106196415  | C            | A   | p.Ser1583Ter             | 18   | 307  | 0.06             | nonsense          | NM_001127208           | c.C4748A             | NA       | NA     | NA          | 9    | 9    | 1    | Deleterious             | LoF                  |
| PR-13  |      | TET2    | chr4:106196508  | C            | A   | p.Pro1614His             | 9    | 98   | 0.10             | missense          | NM_001127208           | c.C4841A             | NA       | NA     | NA          | 2    | 7    | 3    | NA                      | NA                   |
| PR-13  |      | TET2    | chr4:106158415  | G            | A   | p.Glu1104Lys             | 12   | 114  | 0.11             | missense          | NM_017628              | c.G3316A             | NA       | NA     | NA          | 2    | 10   | 1    | NA                      | NA                   |
| PR-13  |      | TET2    | chr4:106156246  | C            | T   | p.Gln383Ter              | 18   | 163  | 0.11             | nonsense          | NM_017628              | c.C1147T             | NA       | NA     | NA          | 11   | 7    | 1    | Deleterious             | LoF                  |
| PR-13  |      | TET2    | chr4:106158394  | T            | C   | p.Ser1099Pro             | 14   | 113  | 0.12             | missense          | NM_017628              | c.T3295C             | NA       | NA     | NA          | 5    | 9    | 2    | NA                      | NA                   |
| PR-13  |      | TET2    | chr4:106196469  | C            | T   | p.Ser1601Leu             | 12   | 87   | 0.14             | missense          | NM_001127208           | c.C4802T             | NA       | NA     | NA          | 5    | 7    | 1    | NA                      | NA                   |
| PR-13  |      | TP53    | chr17:7578517   | G            | A   | p.Ala138Val              | 9    | 139  | 0.06             | missense          | NM_000546              | c.C413T              | NA       | NA     | NA          | 4    | 5    | 2    | Hotspot                 | LoF                  |
| PR-13  |      | TP53    | chr17:7577120   | C            | T   | p.Arg273His              | 15   | 172  | 0.09             | missense          | NM_000546              | c.G818A              | NA       | 0.0005 | rs28934576  | 7    | 8    | 1    | Hotspot                 | LoF                  |
| PR-13  |      | TP53    | chr17:7578523   | T            | C   | p.Gln136Arg              | 13   | 140  | 0.09             | missense          | NM_000546              | c.A407G              | NA       | NA     | NA          | 9    | 4    | 2    | Hotspot                 | LoF                  |
| PR-13  |      | TP53    | chr17:7579487   | G            | A   | p.Pro67Leu               | 9    | 95   | 0.09             | missense          | NM_000546              | c.C200T              | NA       | NA     | NA          | 3    | 6    | 2    | Hotspot                 | LoF                  |
| PR-13  |      | TSC1    | chr9:135786489  | C            | T   | p.Tip347Ter              | 16   | 191  | 0.08             | nonsense          | NM_000368              | c.G1041A             | NA       | NA     | NA          | 6    | 10   | 2    | Deleterious             | LoF                  |
| PR-13  |      | TSC1    | chr9:135772605  | C            | T   | p.Glu981Lys              | 16   | 159  | 0.10             | missense          | NM_000368              | c.G2941A             | NA       | NA     | NA          | 8    | 8    | 1    | NA                      | NA                   |
| PR-13  |      | TSC1    | chr9:135771723  | G            | A   | p.Pro1132Ser             | 12   | 113  | 0.11             | missense          | NM_000368              | c.C3394T             | NA       | NA     | NA          | 7    | 5    | 4    | NA                      | NA                   |
| PR-13  |      | TSC2    | chr16:2134406   | C            | T   | p.Gln1395Ter             | 11   | 189  | 0.06             | nonsense          | NM_000548              | c.C4183T             | NA       | NA     | NA          | 7    | 4    | 1    | Deleterious             | LoF                  |
| PR-13  |      | TSC2    | chr16:2138237   | C            | G   | p.Gln1724Ter             | 4    | 66   | 0.06             | nonsense          | NM_000548              | c.C5170T             | NA       | NA     | rs45472701  | 3    | 1    | 1    | Deleterious             | LoF                  |
| PR-13  |      | TSC2    | chr16:2127688   | G            | A   | p.Arg976Gln              | 24   | 235  | 0.10             | missense          | NM_000548              | c.G2927A             | NA       | NA     | NA          | 9    | 15   | 2    | NA                      | NA                   |
| PR-13  |      | VHL     | chr3:10191617   | G            | A   | p.Glu204Lys              | 6    | 79   | 0.08             | missense          | NM_000551              | c.G610A              | NA       | NA     | NA          | 3    | 3    | 2    | Hotspot                 | LoF                  |
| PR-13  |      | WT1     | chr11:32456690  | G            | A   | p.Gln68Ter               | 9    | 84   | 0.11             | nonsense          | NM_000378              | c.C202T              | NA       | NA     | NA          | 6    | 3    | 1    | Deleterious             | LoF                  |
| PR-13  |      | WT1     | chr11:32414250  | C            | T   | p.Arg434His              | 8    | 71   | 0.11             | missense          | NM_000378              | c.G1250A             | NA       | NA     | rs121907901 | 5    | 3    | 1    | Hotspot                 | LoF                  |
| PR-13  |      | WT1     | chr11:32450055  | G            | A   | p.Gln253Ter              | 16   | 130  | 0.12             | nonsense          | NM_000378              | c.C757T              | NA       | NA     | NA          | 11   | 5    | 1    | Deleterious             | LoF                  |
| PR-13  |      | WT1     | chr11:32456356  | G            | A   | p.Pro179Leu              | 18   | 110  | 0.16             | missense          | NM_000378              | c.C536T              | NA       | NA     | NA          | 7    | 11   | 3    | NA                      | NA                   |
| PR-13  |      | WT1     | chr11:32413529  | G            | A   | p.Thr474Ile              | 21   | 72   | 0.29             | missense          | NM_000378              | c.C1370T             | NA       | NA     | NA          | 12   | 9    | 1    | NA                      | NA                   |
| PR-13  |      | ZNF217  | chr20:52193505  | G            | A   | p.Gln600Ter              | 12   | 226  | 0.05             | nonsense          | NM_006526              | c.C1798T             | NA       | NA     | NA          | 6    | 6    | 1    | NA                      | NA                   |
| PR-14  |      | TP53    | chr17:7577153   | C            | A   | p.Gly262Val              | 507  | 731  | 0.69             | missense          | NM_000546              | c.G785T              | NA       | NA     | NA          | 293  | 214  | 2    | Hotspot                 | LoF                  |
| PR-15  |      | GNA11   | chr19:3118939   | G            | A   | p.Gly208Asp              | 52   | 689  | 0.08             | missense          | NM_002067              | c.G623A              | NA       | NA     | NA          | 24   | 28   | 6    | NA                      | NA                   |
| PR-15  |      | NOTCH1  | chr9:139399186  | G            | A   | p.Leu1653Phe             | 18   | 91   | 0.20             | missense          | NM_017617              | c.C4957T             | NA       | NA     | NA          | 9    | 9    | 1    | NA                      | NA                   |
| PR-15  |      | SPOP    | chr17:47696430  | C            | A   | p.Tip131Cys              | 291  | 810  | 0.36             | missense          | NM_003563              | c.G393T              | NA       | NA     | NA          | 259  | 32   | 4    | Hotspot                 | GoF                  |
| PR-15  |      | TERT    | chr5:1253866    | C            | T   | p.Asp1126Asn             | 8    | 146  | 0.05             | missense          | NM_198253              | c.G3376G             | NA       | NA     | NA          | 3    | 5    | 1    | NA                      | NA                   |
| PR-16  |      | BRCA2   | chr13:32907407  | A            | G   | p.Thr598Ala              | 233  | 306  | 0.76             | missense          | NM_000059              | c.A1792G             | 0.001462 | 0.0018 | rs28987710  | 114  | 119  | 3    | NA                      | NA                   |
| PR-16  |      | MYO18A  | chr17:27424848  | G            | A   | p.Arg1354Trp             | 226  | 922  | 0.25             | missense          | NM_078471              | c.C4060T             | 0.001423 | NA     | NA          | 146  | 80   | 2    | NA                      | NA                   |
| PR-16  |      | TP53    | chr17:7578395   | G            | A   | p.His179Ytrp             | 425  | 841  | 0.51             | missense          | NM_000546              | c.C535T              | NA       | NA     | NA          | 229  | 196  | 2    | Hotspot                 | LoF                  |
| PR-17  |      | TP53    | chr17:7578554   | A            | C   | p.Tyr126Asp              | 402  | 1539 | 0.26             | missense          | NM_000546              | c.C376G              | NA       | NA     | NA          | 192  | 210  | 1    | NA                      | NA                   |
| PR-19  |      | WT1     | chr11:32456704  | C            | T   | p.Gly63Glu               | 285  | 540  | 0.53             | missense          | NM_000378              | c.G188A              | NA       | NA     | NA          | 148  | 137  | 3    | NA                      | NA                   |
| PR-20  |      | APC     | chr5:112177334  | C            | C   | p.Glu2015Gln             | 232  | 1729 | 0.13             | missense          | NM_000038              | c.G6043C             | NA       | NA     | NA          | 111  | 121  | 1    | NA                      | NA                   |
| PR-20  |      | APC     | chr5:112175941  | GAAAGAGGCAGA | G   | p.Glu1552fs              | 309  | 1945 | 0.16             | fsDel             | NM_000038              | c.4651_4661del       | NA       | NA     | NA          | 168  | 141  | 3    | Deleterious             | LoF                  |
| PR-20  |      | ATM     | chr11:108170506 | A            | C   | p.Ser1691Arg             | 1063 | 2000 | 0.53             | missense          | NM_000051              | c.A5071C             | 0.002154 | 0.0005 | rs18000059  | 515  | 548  | 1    | NA                      | NA                   |
| PR-20  |      | BRCA2   | chr13:32911011  | TGA          | T   | p.Arg841fs               | 204  | 1470 | 0.14             | fsDel             | NM_000059              | c.2520_2521del       | NA       | NA     | NA          | 109  | 95   | 1    | Deleterious             | LoF                  |
| PR-20  |      | CDH1    | chr13:32972626  | A            | T   | p.Lys3326Ter             | 892  | 1621 | 0.55             | nonsense          | NM_000059              | c.A9976T             | 0.006459 | 0.01   | rs11571833  | 522  | 370  | 6    | Deleterious             | LoF                  |
| PR-20  |      | BRCA2   | chr16:68867388  | G            | A   | p.Gly879Ser              | 864  | 1862 | 0.46             | missense          | NM_004360              | c.G2635A             | 0.000154 | NA     | NA          | 488  | 376  | 2    | NA                      | NA                   |
| PR-21  |      | AKT1    | chr14:105246551 | C            | T   | p.Glu17Lys               | 413  | 1782 | 0.23             | missense          | NM_005163              | c.G49A               | NA       | NA     | rs121434592 | 216  | 197  | 4    | Hotspot                 | GoF                  |
| PR-21  |      | STK11   | chr19:1226569   | C            | T   | p.Arg409Trp              | 65   | 107  | 0.61             | missense          | NM_000455              | c.C1225T             | 0.000084 | NA     | NA          | 33   | 32   | 2    | NA                      | NA                   |
| PR-22  |      | BRAF    | chr7:140453137  | CTGTGG       | C   | p.Thr599_Val600insHisThr | 891  | 1991 | 0.45             | nonfsIns          | NM_004333              | c.1797_1798insCACACA | NA       | NA     | NA          | 467  | 424  | 1    | Hotspot                 | GoF                  |
| PR-22  |      | DNMT3A  | chr2:25467508   | T            | C   | p.Glu523Gly              | 51   | 911  | 0.06             | missense          | NM_022552              | c.A1568G             | NA       | NA     | NA          | 2    | 49   | 1    | NA                      | NA                   |
| PR-23  |      | DNMT3A  | chr2:25467508   | T            | C   | p.Glu523Gly              | 3    | 582  | 0.06             | missense          | NM_022552              | c.A1568G             | NA       | NA     | NA          | 1    | 32   | 1    | NA                      | NA                   |
| PR-24  |      | CDKN2A  | chr9:21971111   | G            | A   | p.His83Ytrp              | 112  | 1349 | 0.08             | missense          | NM_000077              | c.C247T              | NA       | NA     | rs121913385 | 53   | 59   | 1    | Hotspot                 | LoF                  |
| PR-24  |      | SPOP    | chr17:47696426  | A            | C   | p.Phe1133Val             | 155  | 1999 | 0.08             | missense          | NM_003563              | c.T397G              | NA       | NA     | NA          | 89   | 66   | 2    | Hotspot                 | GoF                  |
| PR-24  |      | TP53    | chr17:7577550   | C            | T   | p.Gly244Asp              | 159  | 2000 | 0.08             | missense          | NM_000546              | c.G731A              | NA       | NA     | rs28934572  | 84   | 75   | 3    | Hotspot                 | LoF                  |
| PR-25  |      | APC     | chr5:112175211  | T            | A   | p.Ile1307Lys             | 676  | 1995 | 0.34             | missense          | NM_000038              | c.T3920A             | 0.001077 | NA     | rs137854579 | 330  | 346  | 1    | NA                      | NA                   |
| PR-25  |      | ATM     | chr11:108236203 | C            | T   | p.Arg3047Ter             | 472  | 2000 | 0.24             | nonsense          | NM_000051              | c.C9139T             | NA       | NA     | rs121434219 | 202  | 270  | 2    | Deleterious             | LoF                  |
| PR-25  |      | BRCA2   | chr13:32972626  | A            | T   | p.Lys3326Ter             | 782  | 952  | 0.82             | nonsense          | NM_000059              | c.A9976T             | 0.006459 | 0.01   | rs11571833  | 473  | 309  | 6    | Deleterious             | LoF                  |
| PR-25  |      | BRCA2   | chr13:32914244  | C            | T   | p.His1918Ytrp            | 1647 | 1999 | 0.82             | missense          | NM_000059              | c.C5752T             | NA       | NA     | rs80358803  | 791  | 755  | 1    | NA                      | NA                   |
| PR-25  |      | PTEH1   | chr10:89717672  | C            | C   | p.Arg233Ter              | 1276 | 1844 | 0.69             | nonsense          | NM_000314              | c.C697T              | NA       | NA     | rs121809219 | 551  | 725  | 1    | Deleterious             | LoF                  |
| PR-26  |      | TP53    | chr17:7577107   | A            | C   | p.Cys277Trp              | 644  | 916  | 0.70             | missense          | NM_000546              | c.T831G              | NA       | NA     | NA          | 346  | 298  | 1    | Hotspot                 | LoF                  |
| PR-26  |      | TSC2    | chr16:2120487   | G            | A   | p.Ala583Thr              | 992  | 1993 | 0.50             | missense          | NM_000548              | c.G1747A             | 0.002693 | 0.0009 | rs1800729   | 594  | 398  | 1    | NA                      | NA                   |
| PR-28  |      | FGFR3   | chr4:1808391    | GG           | G   | p.Ala717Thr              | 341  | 603  | 0.57             | missense          | NM_000142              | c.G2149A             | 0.001    | NA     | rs17882190  | 191  | 150  | 1    | NA                      | NA                   |
| PR-30  |      | APC     | chr5:112174125  | GG           | TT  | p.Arg45Ile               | 161  | 783  | 0.21             | missense/nonfsSub | NM_000038              | c.2834_2835TT        | NA       | NA     | NA          | 101  | 60   | 2    | NA                      | NA                   |
| PR-30  |      | APC     | chr5:112173531  | C            | T   | p.Ser747Leu              | 994  | 1995 | 0.50             | missense          | NM_000038              | c.C2240T             | NA       | NA     | NA          | 510  | 484  | 1    | NA                      | NA                   |
| PR-30  |      | APC     | chr5:112174677  | T            | C   | p.Leu1129Ser             | 1069 | 1998 | 0.54             | missense          | NM_000038              | c.T3386C             | 0.002384 | 0.0018 | rs143638171 | 574  | 495  | 3    | NA                      | NA                   |
| PR-30  |      | NOTCH1  | chr9:139405111  | G            | A   | p.Arg912Trp              | 325  | 634  | 0.51             | missense          | NM_017617              | c.C2734T             | 0.002341 | NA     | NA          | 175  | 150  | 2    | NA                      | NA                   |
| PR-30  |      | TP53    | chr17:7578212   | G            | A   | p.Arg213Ter              | 363  | 1999 | 0.18             | nonsense          | NM_000546              | c.C637T              | NA       | NA     | NA          | 185  | 178  | 1    | Deleterious             | LoF                  |
| PR-32  |      | ATM     | chr11:108142073 | C            | C   | p.Met1006Thr             | 468  | 1998 | 0.23             | missense          | NM_000051              | c.T3017C             | NA       | NA     | NA          | 147  | 321  | 1    | NA                      | NA                   |
| PR-32  |      | ATM     | chr11:108153484 | CT           | T   | p.Phe1209fs              | 1081 | 1373 | 0.79             | fsDel             | NM_000051              | c.3625delT           | NA       |        |             |      |      |      |                         |                      |

| Sample | Pair | Gene    | Location        | Ref | Alt | AA Change    | FAO  | FDP  | Variant Fraction | Variant Type | Transcript ID (RefSeq) | Nucleotide Change  | ESP      | 1000G  | db135       | FSAF | FSAR | HRUN | Onncomine Variant Class | Onncomine Gene Class |
|--------|------|---------|-----------------|-----|-----|--------------|------|------|------------------|--------------|------------------------|--------------------|----------|--------|-------------|------|------|------|-------------------------|----------------------|
| PR-40  |      | BRCA2   | chr13:32900640  | G   | A   | p.Arg174His  | 307  | 1056 | 0.29             | missense     | NM_000059              | c.G521A            | NA       | NA     | rs80358747  | 127  | 180  | 1    | NA                      | NA                   |
| PR-40  |      | MSH2    | chr2:47630382   | G   | A   | p.Gly18Ser   | 6    | 54   | 0.11             | missense     | NM_000251              | c.G52A             | NA       | NA     | NA          | 4    | 2    | 2    | NA                      | NA                   |
| PR-40  |      | NF1     | chr17:29553609  | C   | T   | p.Arg720Trp  | 41   | 388  | 0.11             | missense     | NM_000267              | c.C2158T           | NA       | NA     | NA          | 18   | 23   | 2    | NA                      | NA                   |
| PR-40  |      | NKX2-1  | chr14:36988277  | C   | T   | p.Glu126Lys  | 9    | 124  | 0.07             | missense     | NM_003317              | c.G286A            | NA       | NA     | NA          | 3    | 6    | 1    | NA                      | NA                   |
| PR-40  |      | NOTCH1  | chr9:139399475  | C   | T   | p.Trp1556Ter | 5    | 93   | 0.05             | nonsense     | NM_017617              | c.G4668A           | NA       | NA     | NA          | 3    | 2    | 3    | Deleterious             | LoF                  |
| PR-40  |      | TP53    | chr17:7577580   | T   | C   | p.Tyr234Cys  | 363  | 1234 | 0.29             | missense     | NM_000546              | c.A701G            | NA       | NA     | NA          | 190  | 173  | 1    | Hotspot                 | LoF                  |
| PR-42  |      | APC     | chr5:112175699  | G   | G   | p.Ala1470fs  | 285  | 1976 | 0.14             | fsDel        | NM_000338              | c.4409_4416del     | NA       | NA     | NA          | 121  | 164  | 1    | Deleterious             | LoF                  |
| PR-42  |      | CDH1    | chr16:6835677   | C   | T   | p.Arg90Trp   | 672  | 2000 | 0.34             | missense     | NM_004268              | c.C268T            | NA       | NA     | NA          | 373  | 299  | 1    | NA                      | NA                   |
| PR-42  |      | PIK3CA  | chr3:178936082  | G   | A   | p.Glu542Lys  | 243  | 1996 | 0.12             | missense     | NM_006218              | c.G1524A           | NA       | NA     | rs121913273 | 108  | 135  | 1    | Hotspot                 | GoF                  |
| PR-49  |      | BAP1    | chr3:52439307   | C   | T   | p.Gly312Asp  | 8    | 52   | 0.15             | missense     | NM_004656              | c.G957A            | NA       | NA     | NA          | 2    | 6    | 2    | NA                      | NA                   |
| PR-49  |      | NF1     | chr17:29553582  | C   | T   | p.Arg711Cys  | 34   | 321  | 0.11             | missense     | NM_000267              | c.C2131T           | NA       | NA     | NA          | 17   | 2    | 2    | NA                      | NA                   |
| PR-51  |      | AR      | chrX:68943543   | G   | T   | p.His875Tyr  | 1744 | 1995 | 0.87             | missense     | NM_000044              | c.C2623T           | NA       | NA     | rs137852581 | 900  | 844  | 1    | Hotspot                 | GoF                  |
| PR-51  |      | ATM     | chr11:108164137 | C   | T   | p.Val1570Ala | 151  | 1051 | 0.14             | missense     | NM_000051              | c.T4709C           | 0.000462 | 0.0005 | rs140856217 | 96   | 55   | 5    | NA                      | NA                   |
| PR-51  |      | ATM     | chr11:108115600 | C   | T   | p.Arg250Ter  | 1217 | 1417 | 0.86             | nonsense     | NM_000051              | c.C748T            | NA       | NA     | NA          | 513  | 704  | 1    | Deleterious             | LoF                  |
| PR-51  |      | FOXL2   | chr3:138665210  | C   | T   | p.Gly119Ser  | 23   | 425  | 0.05             | missense     | NM_023067              | c.G356A            | NA       | NA     | NA          | 17   | 6    | 3    | NA                      | NA                   |
| PR-51  |      | MSH2    | chr2:47630388   | G   | A   | p.Val20Met   | 16   | 144  | 0.11             | missense     | NM_000251              | c.G58A             | NA       | NA     | NA          | 6    | 10   | 1    | NA                      | NA                   |
| PR-53  |      | MET     | chr7:116339642  | G   | T   | p.Glu168Asp  | 472  | 887  | 0.53             | missense     | NM_000425              | c.G504T            | 0.005283 | 0.0027 | rs55985569  | 264  | 208  | 1    | Hotspot                 | GoF                  |
| PR-53  |      | MYCL    | chr1:40363189   | G   | C   | p.Ala347Gly  | 15   | 253  | 0.06             | missense     | NM_00103681            | c.C950G            | NA       | NA     | NA          | 14   | 1    | 5    | NA                      | NA                   |
| PR-53  |      | NFE2L2  | chr2:178098831  | C   | T   | p.Ala72Thr   | 193  | 354  | 0.55             | missense     | NM_006164              | c.G214A            | NA       | NA     | rs1135118   | 112  | 81   | 1    | NA                      | NA                   |
| PR-55  |      | FGFR3   | chr4:1801139    | G   | A   | p.Gly90Arg   | 11   | 200  | 0.06             | missense     | NM_000142              | c.G268A            | NA       | NA     | NA          | 6    | 5    | 4    | NA                      | NA                   |
| PR-55  |      | TP53    | chr17:7577539   | G   | A   | p.Arg248Trp  | 1280 | 2000 | 0.64             | missense     | NM_000546              | c.C742T            | NA       | NA     | rs121912651 | 609  | 671  | 2    | Hotspot                 | LoF                  |
| PR-58  |      | BRCA2   | chr13:32954180  | C   | T   | p.Arg3052Trp | 1221 | 1966 | 0.62             | missense     | NM_000059              | c.C9154T           | NA       | NA     | rs44580035  | 581  | 640  | 1    | NA                      | NA                   |
| PR-59  |      | BRAF    | chr7:140453145  | A   | C   | p.L597R      | 911  | 1997 | 0.46             | missense     | NM_004333              | c.T1790G           | NA       | NA     | rs121913366 | 431  | 480  | 1    | NA                      | NA                   |
| PR-60  |      | APC     | chr5:112128177  | A   | G   | p.Asp227Gly  | 1229 | 1999 | 0.61             | missense     | NM_000038              | c.A680G            | NA       | NA     | NA          | 582  | 647  | 1    | NA                      | NA                   |
| PR-60  |      | PTEN    | chr10:89692895  | G   | A   | p.Gly127Arg  | 1165 | 1998 | 0.58             | missense     | NM_000314              | c.G379A            | NA       | NA     | NA          | 507  | 658  | 2    | Hotspot                 | LoF                  |
| PR-60  |      | TP53    | chr17:7577114   | CA  | A   | p.Cys275fs   | 127  | 286  | 0.44             | fsDel        | NM_000546              | c.G23delT          | NA       | NA     | NA          | 74   | 53   | 3    | Deleterious             | LoF                  |
| PR-62  |      | BRCA1   | chr17:41203135  | C   | T   | NA           | 702  | 849  | 0.8269           | splice       | NM_007294              | exon21:c.5278-1G>A | NA       | NA     | rs80358099  | 329  | 373  | 1    | NA                      | NA                   |
| PR-62  |      | FGFR3   | chr4:1806131    | T   | C   | p.Phe384Leu  | 213  | 234  | 0.91             | missense     | NM_000142              | c.T1150C           | 0.003614 | 0.0018 | rs17881656  | 123  | 90   | 2    | NA                      | NA                   |
| PR-62  |      | PTEN    | chr10:89685307  | T   | C   | p.Tyr68His   | 1329 | 1998 | 0.67             | missense     | NM_000314              | c.T202C            | NA       | NA     | NA          | 616  | 713  | 1    | Hotspot                 | LoF                  |
| PR-62  |      | TP53    | chr17:7577124   | C   | T   | p.Val272Met  | 774  | 1000 | 0.77             | missense     | NM_000546              | c.G814A            | NA       | NA     | NA          | 413  | 361  | 2    | Hotspot                 | LoF                  |
| PR-63  |      | ATM     | chr11:108159816 | CT  | C   | p.Ser1409fs  | 507  | 1976 | 0.26             | fsDel        | NM_000051              | c.4223delT         | NA       | NA     | NA          | 228  | 279  | 3    | Deleterious             | LoF                  |
| PR-63  |      | TET2    | chr4:106155843  | C   | A   | p.His248Gln  | 980  | 1999 | 0.49             | missense     | NM_017628              | c.C744A            | 0.000154 | NA     | NA          | 551  | 429  | 1    | NA                      | NA                   |
| PR-63  |      | TET2    | chr4:106156384  | C   | A   | p.Gly429Arg  | 1039 | 1999 | 0.52             | missense     | NM_017628              | c.G1285A           | 0.000615 | NA     | NA          | 574  | 465  | 2    | NA                      | NA                   |
| PR-66  |      | BRCA1   | chr17:41246061  | C   | T   | p.Arg496His  | 911  | 1999 | 0.46             | missense     | NM_007294              | c.G1487A           | 0.000615 | NA     | rs28897677  | 477  | 434  | 1    | NA                      | NA                   |
| PR-66  |      | TET2    | chr4:106196927  | C   | T   | p.Gly1754Arg | 927  | 1989 | 0.47             | missense     | NM_001127208           | c.G5260C           | NA       | NA     | NA          | 516  | 411  | 2    | NA                      | NA                   |
| PR-69  |      | ATM     | chr11:108203487 | A   | G   | NA           | 420  | 2000 | 0.21             | splice       | NM_000051              | exon53:c.7789-2A>G | NA       | NA     | NA          | 200  | 220  | 1    | NA                      | NA                   |
| PR-69  |      | IFITM3  | chr11:320606    | G   | T   | p.Pro70Thr   | 215  | 1193 | 0.18             | missense     | NM_021034              | c.C208A            | NA       | NA     | NA          | 102  | 113  | 4    | Hotspot                 | GoF                  |
| PR-72  | 9    | TSC1    | chr9:135782214  | G   | A   | p.Pro448Ser  | 1045 | 1999 | 0.52             | missense     | NM_000368              | c.C1342T           | 0.003844 | 0.0032 | NA          | 544  | 501  | 2    | NA                      | NA                   |
| PR-74  | 9    | TP53    | chr17:7576916   | G   | G   | p.Asn310fs   | 333  | 457  | 0.73             | fsIns        | NM_000546              | c.929_930insAA     | NA       | NA     | NA          | 159  | 174  | 2    | Deleterious             | LoF                  |
| PR-74  | 9    | TSC1    | chr9:135782214  | G   | A   | p.Pro448Ser  | 1001 | 1998 | 0.50             | missense     | NM_000368              | c.C1342T           | 0.003844 | 0.0032 | NA          | 446  | 555  | 2    | NA                      | NA                   |
| PR-77  | 5    | BRCA2   | chr13:32914592  | C   | T   | p.Arg2034Cys | 860  | 2000 | 0.43             | missense     | NM_000059              | c.C6100T           | 0.003999 | 0.0018 | rs1799954   | 460  | 400  | 1    | NA                      | NA                   |
| PR-78  |      | TSC1    | chr9:135772014  | C   | T   | p.Gly1035Ser | 246  | 450  | 0.55             | missense     | NM_000368              | c.G3103A           | 0.001232 | 0.0032 | NA          | 115  | 131  | 2    | NA                      | NA                   |
| PR-83  |      | APC     | chr5:112177072  | TC  | C   | p.Gln1928fs  | 1778 | 1972 | 0.90             | fsDel        | NM_000038              | c.5782delC         | NA       | NA     | NA          | 910  | 868  | 1    | Deleterious             | LoF                  |
| PR-83  |      | BRCA1   | chr17:41245075  | C   | A   | p.Asp825Tyr  | 1274 | 1995 | 0.64             | missense     | NM_007294              | c.G2473T           | NA       | NA     | rs80357328  | 684  | 590  | 1    | NA                      | NA                   |
| PR-83  |      | TP53    | chr17:7578503   | C   | T   | p.Val143Met  | 767  | 886  | 0.87             | missense     | NM_000546              | c.G427A            | NA       | NA     | NA          | 331  | 436  | 1    | Hotspot                 | LoF                  |
| PR-84  |      | NKX2-1  | chr14:36986692  | C   | G   | p.Ala333Pro  | 11   | 177  | 0.06             | missense     | NM_003317              | c.G907C            | NA       | NA     | NA          | 9    | 2    | 2    | NA                      | NA                   |
| PR-84  |      | PIK3CA  | chr3:178952018  | A   | C   | p.Thr1025Ala | 660  | 1996 | 0.33             | missense     | NM_006218              | c.A3073G           | NA       | NA     | NA          | 443  | 217  | 1    | Hotspot                 | GoF                  |
| PR-84  |      | TP53    | chr17:7579521   | C   | A   | p.Glu56Ter   | 507  | 1399 | 0.36             | nonsense     | NM_000546              | c.G166T            | NA       | NA     | NA          | 250  | 257  | 1    | Deleterious             | LoF                  |
| PR-85  |      | RB1     | chr13:48923160  | G   | A   | NA           | 58   | 244  | 0.2377           | splice       | NM_000321              | exon6:c.607+1G>A   | NA       | NA     | NA          | 40   | 18   | 2    | NA                      | NA                   |
| PR-85  |      | TP53    | chr17:7577142   | C   | A   | p.Gly266Ter  | 519  | 1401 | 0.37             | nonsense     | NM_000546              | c.G796T            | NA       | NA     | NA          | 291  | 228  | 3    | Deleterious             | LoF                  |
| PR-85  |      | WT1     | chr11:32438035  | C   | C   | NA           | 473  | 1992 | 0.2374           | splice       | NM_001198551           | exon6:c.365+1G>C   | NA       | NA     | NA          | 304  | 169  | 1    | NA                      | NA                   |
| PR-87  |      | FGFR3   | chr4:1801504    | G   | A   | p.Gly137Glu  | 17   | 297  | 0.06             | missense     | NM_000142              | c.G410A            | NA       | NA     | NA          | 12   | 5    | 4    | NA                      | NA                   |
| PR-87  |      | TSC2    | chr16:2129557   | G   | A   | NA           | 6    | 51   | 0.1176           | splice       | NM_000548              | exon29:c.3285-1G>A | NA       | NA     | NA          | 3    | 3    | 1    | NA                      | NA                   |
| PR-88  | 5    | BRCA2   | chr13:32914592  | C   | T   | p.Arg2034Cys | 1047 | 2000 | 0.52             | missense     | NM_000059              | c.C6100T           | 0.003999 | 0.0018 | rs1799954   | 504  | 543  | 1    | NA                      | NA                   |
| PR-88  | 5    | CTNINB1 | chr3:41266113   | C   | G   | p.Ser37Cys   | 207  | 1997 | 0.10             | missense     | NM_001904              | c.C110G            | NA       | NA     | rs121913403 | 126  | 81   | 1    | Hotspot                 | GoF                  |
| PR-89  |      | AKT1    | chr14:105241492 | T   | G   | p.Lys163Thr  | 442  | 1288 | 0.34             | missense     | NM_005163              | c.A488C            | NA       | NA     | NA          | 219  | 223  | 2    | NA                      | NA                   |
| PR-89  |      | BRCA2   | chr13:32920987  | T   | A   | p.Phe2321Ile | 371  | 1997 | 0.19             | missense     | NM_000059              | c.T6961A           | NA       | NA     | NA          | 155  | 216  | 3    | NA                      | NA                   |
| PR-89  |      | TP53    | chr17:7577094   | G   | A   | p.Arg282Trp  | 183  | 912  | 0.20             | missense     | NM_000546              | c.C984T            | 0.000154 | NA     | rs28934574  | 102  | 81   | 2    | Hotspot                 | LoF                  |
| PR-90  |      | ATM     | chr11:108117837 | C   | T   | p.Ser339Phe  | 481  | 1141 | 0.42             | missense     | NM_000051              | c.C998T            | 0.001385 | 0.0014 | rs28904919  | 224  | 257  | 1    | NA                      | NA                   |
| PR-90  |      | BRCA1   | chr17:41246037  | C   | T   | p.Arg504His  | 654  | 2000 | 0.33             | missense     | NM_007294              | c.G1511A           | 0.000077 | NA     | rs56272539  | 299  | 355  | 1    | NA                      | NA                   |
| PR-90  |      | BRCA2   | chr13:32913562  | A   | C   | p.Lys1690Asn | 698  | 1431 | 0.49             | missense     | NM_000059              | c.A5070C           | 0.000155 | NA     | rs56087561  | 366  | 332  | 7    | NA                      | NA                   |
| PR-90  |      | DNMT3A  | chr2:25467508   | T   | C   | p.Glu523Gly  | 10   | 190  | 0.05             | missense     | NM_022552              | c.A1569G           | NA       | NA     | NA          | 1    | 9    | 1    | NA                      | NA                   |
| PR-90  |      | FOXL2   | chr3:138665201  | C   | T   | p.Glu122Lys  | 14   | 233  | 0.06             | missense     | NM_023067              | c.G364A            | NA       | NA     | NA          | 8    | 6    | 1    | NA                      | NA                   |
| PR-90  |      | GNA11   | chr19:3119004   | G   | G   | p.Val230Ile  | 15   | 253  | 0.06             | missense     | NM_020267              | c.G688A            | NA       | NA     | NA          | 8    | 7    | 1    | NA                      | NA                   |
| PR-90  |      | TSC2    | chr16:2134247   | C   | T   | p.Gln1342Ter | 22   | 280  | 0.08             | nonsense     | NM_000548              | c.C4024T           | NA       | NA     | NA          | 8    | 14   | 2    | Deleterious             | LoF                  |
| PR-90  |      | TSC2    | chr16:2115547   | C   | T   | p.Pro543Ser  | 63   | 308  | 0.20             | missense     | NM_000548              | c.C1627T           | NA       | NA     | NA          | 7    | 56   | 5    | NA                      | NA                   |
| PR-91  |      | PIK3R1  | chr5:67591097   | A   | G   | p.Asn564Asp  | 291  | 2000 | 0.15             | missense     | NM_181504              | c.A880G            | NA       | NA     | NA          | 157  | 134  | 2    | Hotspot                 | LoF                  |
| PR-91  |      | TP53    | chr17:7574017   | C   | A   | p.Arg337Leu  | 277  | 697  | 0.40             | missense     | NM_000546              | c.G1010T           | NA       | NA     | NA          | 119  | 158  | 1    | Hotspot                 | LoF                  |
| PR-92  |      | ATM     | chr11:108160364 | C   | C   | p.Glu1424Asp | 261  | 948  | 0.28             | missense     | NM_000051              | c.G4272C           | NA       | NA     | NA          | 131  |      |      |                         |                      |

| Sample | Pair | Gene           | Location        | Ref | Alt | AA Change    | FAO | FDP  | Variant Fraction | Variant Type | Transcript ID (RefSeq) | Nucleotide Change | ESP      | 1000G | db135       | FSAF | FSAR | HRUN | Onncomine Variant Class | Onncomine Gene Class |
|--------|------|----------------|-----------------|-----|-----|--------------|-----|------|------------------|--------------|------------------------|-------------------|----------|-------|-------------|------|------|------|-------------------------|----------------------|
| PR-96  |      | <i>BRCA1</i>   | chr17:41244183  | G   | A   | p.Trp1122Ile | 127 | 1071 | 0.12             | missense     | NM_007294              | c.C3365T          | NA       | NA    | NA          | 53   | 74   | 1    | NA                      | NA                   |
| PR-96  |      | <i>BTX</i>     | chrX:100611126  | G   | A   | p.Gln494Ter  | 43  | 765  | 0.06             | nonsense     | NM_000061              | c.C1480T          | NA       | NA    | NA          | 16   | 27   | 2    | NA                      | NA                   |
| PR-96  |      | <i>CBL</i>     | chr11:119148967 | G   | A   | p.Cys396Tyr  | 40  | 809  | 0.05             | missense     | NM_005188              | c.G1187A          | NA       | NA    | NA          | 22   | 18   | 1    | Hotspot                 | GoF                  |
| PR-96  |      | <i>CBL</i>     | chr11:119148948 | G   | A   | p.Asp390Asn  | 49  | 790  | 0.06             | missense     | NM_005188              | c.G1168A          | NA       | NA    | NA          | 29   | 20   | 2    | NA                      | NA                   |
| PR-96  |      | <i>CBL</i>     | chr11:119149003 | G   | A   | p.Trp408Ter  | 58  | 804  | 0.07             | nonsense     | NM_005188              | c.G1223A          | NA       | NA    | NA          | 27   | 31   | 2    | NA                      | NA                   |
| PR-96  |      | <i>CD274</i>   | chr9:5467845    | G   | A   | p.Val391Ile  | 80  | 791  | 0.10             | missense     | NM_005188              | c.G1171A          | NA       | NA    | NA          | 44   | 36   | 1    | NA                      | NA                   |
| PR-96  |      | <i>CD274</i>   | chr9:5465519    | C   | T   | p.His285Tyr  | 18  | 351  | 0.05             | missense     | NM_014143              | c.C856T           | NA       | NA    | NA          | 9    | 1    | NA   | NA                      | NA                   |
| PR-96  |      | <i>CDKN2A</i>  | chr9:21971050   | C   | T   | p.Pro235Ser  | 48  | 788  | 0.06             | missense     | NM_014143              | c.C733T           | NA       | NA    | NA          | 26   | 22   | 2    | NA                      | NA                   |
| PR-96  |      | <i>CDKN2A</i>  | chr9:21971060   | C   | T   | p.Arg103Gln  | 19  | 170  | 0.11             | missense     | NM_000077              | c.G308A           | 0.000155 | NA    | rs143282362 | 10   | 9    | 2    | NA                      | NA                   |
| PR-96  |      | <i>CDKN2A</i>  | chr9:21971099   | C   | T   | p.Ala100Thr  | 21  | 169  | 0.12             | missense     | NM_000077              | c.G298A           | NA       | NA    | NA          | 12   | 9    | 3    | Hotspot                 | LoF                  |
| PR-96  |      | <i>CDKN2A</i>  | chr9:21971109   | G   | A   | p.P131L      | 30  | 230  | 0.13             | missense     | NM_058195              | c.C392T           | NA       | NA    | NA          | 14   | 16   | 2    | NA                      | NA                   |
| PR-96  |      | <i>CDKN2A</i>  | chr9:21968743   | C   | T   | p.C162Y      | 26  | 107  | 0.24             | missense     | NM_001195132           | c.G485A           | NA       | NA    | NA          | 17   | 9    | 1    | NA                      | NA                   |
| PR-96  |      | <i>CHEK2</i>   | chr22:29091831  | C   | T   | p.Gly376Arg  | 66  | 888  | 0.07             | missense     | NM_007194              | c.G1126A          | NA       | NA    | NA          | 23   | 43   | 3    | NA                      | NA                   |
| PR-96  |      | <i>CSF1R</i>   | chr5:149449799  | G   | A   | p.Ser422Phe  | 60  | 1144 | 0.05             | missense     | NM_005211              | c.C1265T          | NA       | NA    | NA          | 32   | 28   | 1    | NA                      | NA                   |
| PR-96  |      | <i>CSNK2A1</i> | chr20:470488    | C   | G   | p.Cys220Tyr  | 36  | 682  | 0.05             | missense     | NM_001895              | c.G659A           | NA       | NA    | NA          | 22   | 14   | 1    | NA                      | NA                   |
| PR-96  |      | <i>CSNK2A1</i> | chr20:470500    | G   | T   | p.Trp216Ter  | 57  | 681  | 0.08             | nonsense     | NM_001895              | c.G647A           | NA       | NA    | NA          | 34   | 23   | 2    | NA                      | NA                   |
| PR-96  |      | <i>ESR1</i>    | chr6:152419942  | G   | A   | p.Met543Ile  | 64  | 1197 | 0.05             | missense     | NM_000125              | c.G1629A          | NA       | NA    | NA          | 36   | 28   | 1    | NA                      | NA                   |
| PR-96  |      | <i>EZH2</i>    | chr7:148506432  | G   | A   | p.His694Tyr  | 43  | 835  | 0.05             | missense     | NM_004456              | c.C2080T          | NA       | NA    | NA          | 19   | 24   | 1    | NA                      | NA                   |
| PR-96  |      | <i>EZH2</i>    | chr7:148506467  | G   | A   | p.Ala682Val  | 43  | 832  | 0.05             | missense     | NM_004456              | c.C2045T          | NA       | NA    | NA          | 19   | 24   | 1    | Hotspot                 | GoF                  |
| PR-96  |      | <i>EZH2</i>    | chr7:148506462  | G   | A   | p.Arg684Cys  | 46  | 832  | 0.06             | missense     | NM_004456              | c.C2050T          | NA       | NA    | NA          | 17   | 29   | 3    | Hotspot                 | GoF                  |
| PR-96  |      | <i>EZH2</i>    | chr7:148506419  | G   | A   | p.Pro698Leu  | 53  | 832  | 0.06             | missense     | NM_004456              | c.C2093T          | NA       | NA    | NA          | 22   | 31   | 2    | NA                      | NA                   |
| PR-96  |      | <i>FGFR2</i>   | chr10:123247571 | C   | T   | p.Met640Ile  | 20  | 284  | 0.07             | missense     | NM_000141              | c.G1920A          | NA       | NA    | NA          | 3    | 17   | 1    | NA                      | NA                   |
| PR-96  |      | <i>FLT3</i>    | chr13:28592642  | C   | T   | p.Asp835Asn  | 79  | 1991 | 0.04             | missense     | NA                     | NA                | NA       | NA    | NA          | NA   | NA   | NA   | Hotspot                 | GoF                  |
| PR-96  |      | <i>FLT3</i>    | chr13:28609780  | C   | T   | p.Trp483Ter  | 106 | 2000 | 0.05             | nonsense     | NM_004119              | c.G1449A          | NA       | NA    | NA          | 59   | 47   | 2    | NA                      | NA                   |
| PR-96  |      | <i>FLT3</i>    | chr13:28623521  | C   | T   | p.Glu346Lys  | 39  | 715  | 0.05             | missense     | NM_004119              | c.G1036A          | NA       | NA    | NA          | 36   | 3    | 2    | NA                      | NA                   |
| PR-96  |      | <i>FLT3</i>    | chr13:28608333  | G   | A   | p.Gln575Ter  | 79  | 1436 | 0.06             | nonsense     | NM_004119              | c.C1723T          | NA       | NA    | NA          | 42   | 37   | 2    | NA                      | NA                   |
| PR-96  |      | <i>FLT3</i>    | chr13:28623529  | G   | A   | p.Thr343Ile  | 47  | 738  | 0.06             | missense     | NM_004119              | c.C1028T          | NA       | NA    | NA          | 23   | 24   | 2    | NA                      | NA                   |
| PR-96  |      | <i>FLT3</i>    | chr13:28608081  | C   | T   | p.Ala629Thr  | 145 | 1873 | 0.08             | missense     | NM_004119              | c.G1885A          | NA       | NA    | NA          | 76   | 69   | 1    | NA                      | NA                   |
| PR-96  |      | <i>FOXL2</i>   | chr3:138665207  | C   | T   | p.Gly120Ser  | 96  | 1369 | 0.07             | missense     | NM_023067              | c.G358A           | NA       | NA    | NA          | 56   | 40   | 2    | NA                      | NA                   |
| PR-96  |      | <i>GNA11</i>   | chr19:3118948   | C   | T   | p.Ser211Leu  | 36  | 653  | 0.06             | missense     | NM_020267              | c.C632T           | NA       | NA    | NA          | 19   | 17   | 1    | NA                      | NA                   |
| PR-96  |      | <i>GNAQ</i>    | chr9:80409389   | G   | A   | p.Ser242Leu  | 40  | 765  | 0.05             | missense     | NM_020272              | c.C725T           | NA       | NA    | NA          | 22   | 18   | 1    | NA                      | NA                   |
| PR-96  |      | <i>IDH1</i>    | chr2:209113166  | C   | T   | p.Cys114Tyr  | 61  | 1069 | 0.06             | missense     | NM_05896               | c.G341A           | NA       | NA    | NA          | 38   | 23   | 1    | NA                      | NA                   |
| PR-96  |      | <i>IL6</i>     | chr7:22771071   | C   | T   | p.Ala173Val  | 20  | 287  | 0.07             | missense     | NM_000600              | c.C518T           | NA       | NA    | NA          | 9    | 11   | 2    | NA                      | NA                   |
| PR-96  |      | <i>JAK2</i>    | chr9:5073762    | G   | A   | p.Gly614Glu  | 56  | 1009 | 0.06             | missense     | NM_004972              | c.G1841A          | NA       | NA    | NA          | 22   | 34   | 2    | NA                      | NA                   |
| PR-96  |      | <i>JAK2</i>    | chr9:5073764    | G   | A   | p.Val615Ile  | 58  | 1009 | 0.06             | missense     | NM_004972              | c.G1843A          | NA       | NA    | NA          | 22   | 36   | 1    | NA                      | NA                   |
| PR-96  |      | <i>JAK2</i>    | chr9:5072507    | C   | T   | p.Gln553Ter  | 7   | 84   | 0.08             | nonsense     | NM_004972              | c.C1657T          | NA       | NA    | NA          | 7    | 0    | 2    | NA                      | NA                   |
| PR-96  |      | <i>KIT</i>     | chr4:55599344   | G   | A   | p.Val824Met  | 107 | 2000 | 0.05             | missense     | NM_000222              | c.G2470A          | NA       | NA    | NA          | 63   | 44   | 1    | NA                      | NA                   |
| PR-96  |      | <i>KIT</i>     | chr4:55593652   | G   | T   | p.Pro573Leu  | 47  | 827  | 0.06             | missense     | NM_000222              | c.C1718T          | NA       | NA    | NA          | 22   | 25   | 3    | Hotspot                 | GoF                  |
| PR-96  |      | <i>KIT</i>     | chr4:55593680   | C   | T   | p.Trp582Ter  | 25  | 312  | 0.08             | nonsense     | NM_000222              | c.G1746A          | NA       | NA    | NA          | 12   | 13   | 3    | NA                      | NA                   |
| PR-96  |      | <i>KNSTRN</i>  | chr15:40675097  | G   | A   | p.Glu21Lys   | 33  | 579  | 0.06             | missense     | NM_033286              | c.G61A            | NA       | NA    | NA          | 11   | 22   | 1    | NA                      | NA                   |
| PR-96  |      | <i>KNSTRN</i>  | chr15:40675118  | C   | T   | p.Pro28Ser   | 42  | 569  | 0.07             | missense     | NM_033286              | c.C82T            | NA       | NA    | NA          | 17   | 25   | 2    | NA                      | NA                   |
| PR-96  |      | <i>KNSTRN</i>  | chr15:40675151  | C   | T   | p.Gln39Ter   | 81  | 564  | 0.14             | nonsense     | NM_033286              | c.C115T           | NA       | NA    | NA          | 27   | 54   | 3    | NA                      | NA                   |
| PR-96  |      | <i>MCL1</i>    | chr1:150551351  | C   | T   | p.Gly219Asp  | 107 | 1997 | 0.05             | missense     | NM_021960              | c.G656A           | NA       | NA    | NA          | 60   | 47   | 2    | NA                      | NA                   |
| PR-96  |      | <i>MED12</i>   | chrX:70339286   | G   | A   | p.Glu55Lys   | 13  | 201  | 0.06             | missense     | NM_005120              | c.G163A           | NA       | NA    | NA          | 0    | 13   | 1    | NA                      | NA                   |
| PR-96  |      | <i>MED12</i>   | chrX:70339226   | G   | A   | p.Glu35Lys   | 17  | 197  | 0.09             | missense     | NM_005120              | c.G103A           | NA       | NA    | NA          | 0    | 17   | 1    | NA                      | NA                   |
| PR-96  |      | <i>MED12</i>   | chrX:70339271   | G   | A   | p.Ala50Thr   | 35  | 201  | 0.17             | missense     | NM_005120              | c.G148A           | NA       | NA    | NA          | 0    | 35   | 1    | NA                      | NA                   |
| PR-96  |      | <i>MET</i>     | chr7:116339379  | G   | A   | p.Val81Ile   | 39  | 668  | 0.06             | missense     | NM_000245              | c.G241A           | NA       | NA    | NA          | 24   | 15   | 2    | NA                      | NA                   |
| PR-96  |      | <i>MET</i>     | chr7:116339433  | G   | T   | p.Gln99Ter   | 45  | 690  | 0.07             | nonsense     | NM_000245              | c.C295T           | NA       | NA    | NA          | 22   | 23   | 1    | NA                      | NA                   |
| PR-96  |      | <i>MSH2</i>    | chr2:47630379   | G   | A   | p.Val17Ile   | 31  | 169  | 0.18             | missense     | NM_000251              | c.G49A            | NA       | NA    | NA          | 12   | 19   | 2    | NA                      | NA                   |
| PR-96  |      | <i>MYO18A</i>  | chr17:27424878  | C   | T   | p.Glu1344Lys | 115 | 1998 | 0.06             | missense     | NM_078471              | c.G4030A          | NA       | NA    | NA          | 68   | 47   | 2    | NA                      | NA                   |
| PR-96  |      | <i>NF1</i>     | chr17:29509666  | G   | A   | p.Glu291Lys  | 98  | 871  | 0.11             | missense     | NM_000267              | c.G871A           | NA       | NA    | NA          | 50   | 48   | 1    | NA                      | NA                   |
| PR-96  |      | <i>NF1</i>     | chr17:29553550  | C   | T   | p.Thr700Ile  | 30  | 245  | 0.12             | missense     | NM_000267              | c.C2099T          | NA       | NA    | NA          | 11   | 19   | 1    | NA                      | NA                   |
| PR-96  |      | <i>NF1</i>     | chr17:29546083  | G   | A   | p.Val530Ile  | 905 | 1941 | 0.47             | missense     | NM_000267              | c.G1588A          | 0.000154 | NA    | rs145191978 | 501  | 404  | 1    | NA                      | NA                   |
| PR-96  |      | <i>NFE2L2</i>  | chr2:178098953  | C   | T   | p.Gly31Glu   | 50  | 1264 | 0.04             | missense     | NA                     | NA                | NA       | NA    | NA          | NA   | NA   | NA   | Hotspot                 | GoF                  |
| PR-96  |      | <i>NFE2L2</i>  | chr2:178098944  | C   | T   | p.Arg34Gln   | 68  | 1263 | 0.05             | missense     | NM_006164              | c.G101A           | NA       | NA    | NA          | 36   | 32   | 1    | Hotspot                 | GoF                  |
| PR-96  |      | <i>NOTCH1</i>  | chr9:139390701  | G   | A   | p.Thr2497Ile | 40  | 386  | 0.10             | missense     | NM_017617              | c.C7490T          | NA       | NA    | NA          | 36   | 4    | 5    | NA                      | NA                   |
| PR-96  |      | <i>NOTCH1</i>  | chr9:139391102  | C   | T   | p.Met2363Ile | 13  | 119  | 0.11             | missense     | NM_017617              | c.G7089A          | NA       | NA    | NA          | 2    | 11   | 1    | NA                      | NA                   |
| PR-96  |      | <i>NOTCH1</i>  | chr9:139418259  | CA  | CG  | NA           | 342 | 390  | 0.88             | nonfsSub     | NM_017617              | c.312_313CG       | NA       | NA    | NA          | 206  | 136  | 1    | NA                      | NA                   |
| PR-96  |      | <i>PDGFRA</i>  | chr4:55146565   | G   | A   | p.Glu747Lys  | 89  | 1197 | 0.07             | missense     | NM_006220              | c.C2298A          | NA       | NA    | NA          | 43   | 46   | 1    | NA                      | NA                   |
| PR-96  |      | <i>PIK3CA</i>  | chr3:178936074  | C   | T   | p.Pro539Leu  | 66  | 1321 | 0.05             | missense     | NM_006218              | c.C1161T          | NA       | NA    | NA          | 29   | 37   | 2    | Hotspot                 | GoF                  |
| PR-96  |      | <i>PIK3CA</i>  | chr3:178938839  | C   | T   | p.Ala694Val  | 52  | 1030 | 0.05             | missense     | NM_006218              | c.C2081T          | NA       | NA    | NA          | 16   | 36   | 1    | NA                      | NA                   |
| PR-96  |      | <i>PIK3CA</i>  | chr3:178938940  | C   | T   | p.Gln728Ter  | 54  | 1035 | 0.05             | nonsense     | NM_006218              | c.C2182T          | NA       | NA    | NA          | 15   | 39   | 1    | NA                      | NA                   |
| PR-96  |      | <i>PIK3CA</i>  | chr3:178928068  | C   | T   | p.Pro449Leu  | 17  | 320  | 0.05             | missense     | NM_006218              | c.C1346T          | NA       | NA    | NA          | 3    | 14   | 2    | NA                      | NA                   |
| PR-96  |      | <i>PIK3CA</i>  | chr3:178947818  | C   | T   | p.Thr898Ile  | 41  | 759  | 0.05             | missense     | NM_006218              | c.C2693T          | NA       | NA    | NA          | 13   | 28   | 1    | NA                      | NA                   |
| PR-96  |      | <i>PIK3CA</i>  | chr3:178952039  | G   | A   | p.Glu1032Lys | 28  | 485  | 0.06             | missense     | NM_006218              | c.G3094A          | NA       | NA    | NA          | 25   | 3    | 1    | NA                      | NA                   |
| PR-96  |      | <i>PIK3CA</i>  | chr3:178947848  | C   | T   | p.Thr908Ile  | 46  | 758  | 0.06             | missense     | NM_006218              | c.C2723T          | NA       | NA    | NA          | 25   | 21   | 2    | NA                      | NA                   |
| PR-96  |      | <i>PIK3CA</i>  | chr3:178947803  | C   | T   | p.Ala893Val  | 48  | 753  | 0.06             | missense     | NM_006218              | c.C2678T          | NA       | NA    | NA          | 20   | 28   | 2    | NA                      | NA                   |
| PR-96  |      | <i>PIK3CA</i>  | chr3:178947865  | G   | A   | p.Gly914Arg  | 53  | 758  | 0.07             | missense     | NM_006218              | c.G2740A          | NA       | NA    | NA          | 24   | 29   | 2    | NA                      | NA                   |
| PR-96  |      | <i>PPARG</i>   | chr3:12458321   | G   | A   | p.Cys313Tyr  | 89  | 1777 | 0.05             | missense     | NM_005037              | c.G854A           | NA       | NA    | NA          | 39   | 50   | 1    | NA                      | NA                   |
| PR-96  |      | <i>PPARG</i>   | chr3:12475417   | G   | A   | p.Val431Met  | 103 | 2000 | 0.05             | missense     | NM_005037              | c.G1207A          | NA       | NA    | NA          | 62   | 41   | 1    | NA                      | NA                   |
| PR-96  |      | <i>PTEN</i>    | chr10:89692871  | G   | A   | p.Val119Ile  |     |      |                  |              |                        |                   |          |       |             |      |      |      |                         |                      |

| Sample | Pair | Gene    | Location        | Ref        | Alt  | AA Change    | FAO  | FDP  | Variant Fraction | Variant Type | Transcript ID (RefSeq) | Nucleotide Change | ESP      | 1000G  | db135       | FSAF | FSAR | HRUN | Onncomine Variant Class | Onncomine Gene Class |
|--------|------|---------|-----------------|------------|------|--------------|------|------|------------------|--------------|------------------------|-------------------|----------|--------|-------------|------|------|------|-------------------------|----------------------|
| PR-96  |      | WT1     | chr11:32413526  | C          | T    | p.Gly475Asp  | 28   | 442  | 0.06             | missense     | NM_024426              | c.G1424A          | NA       | NA     | NA          | 15   | 13   | 2    | NA                      | NA                   |
| PR-98  |      | ATM     | chr11:108236086 | C          | T    | p.Arg3008Cys | 661  | 1999 | 0.33             | missense     | NM_000051              | c.C9022T          | NA       | NA     | NA          | 370  | 291  | 1    | Hotspot                 | LoF                  |
| PR-98  |      | BRCA1   | chr17:41244524  | C          | T    | p.Met1008Ile | 1045 | 2000 | 0.52             | missense     | NM_007294              | c.G3024A          | 0.000461 | 0.0014 | rs1800704   | 436  | 609  | 1    | NA                      | NA                   |
| PR-100 |      | BRCA1   | chr17:41223166  | G          | A    | p.Arg1610Cys | 688  | 734  | 0.94             | missense     | NM_007294              | c.C4765T          | NA       | NA     | rs80357002  | 269  | 419  | 1    | NA                      | NA                   |
| PR-100 |      | NF1     | chr17:29664858  | A          | G    | p.Trp222Ala  | 612  | 1755 | 0.35             | missense     | NM_000267              | c.A6601G          | NA       | NA     | NA          | 297  | 315  | 2    | NA                      | NA                   |
| PR-100 |      | PIK3R1  | chr5:67588181   | T          | TA   | p.Ile338Ile  | 946  | 1251 | 0.76             | fsIns        | NM_181564              | c.2020dupA        | NA       | NA     | NA          | 490  | 456  | 1    | Deleterious             | LoF                  |
| PR-100 |      | RB1     | chr13:4894262   | AG         | A    | NA           | 1153 | 1391 | 0.8289           | splice       | NM_000321              | exon11.c.1050-1G> | NA       | NA     | NA          | 493  | 660  | 1    | NA                      | NA                   |
| PR-100 |      | TP53    | chr17:7577538   | C          | T    | p.Arg248Gln  | 1666 | 1989 | 0.83             | missense     | NM_000546              | c.G743A           | 0.000077 | NA     | rs1540652   | 718  | 948  | 2    | Hotspot                 | LoF                  |
| PR-101 |      | NF1     | chr17:29653350  | O1         | C    | p.Thr700Ile  | 42   | 333  | 0.13             | missense     | NM_000267              | c.C3099T          | NA       | NA     | NA          | 18   | 24   | 1    | NA                      | NA                   |
| PR-102 | 1    | ATM     | chr11:108106471 | AT         | A    | p.Tyr137Ile  | 484  | 529  | 0.91             | fsDel        | NM_000051              | c.A407delT        | NA       | NA     | NA          | 129  | 355  | 3    | Deleterious             | LoF                  |
| PR-102 | 1    | BRCA2   | chr13:32972626  | A          | T    | p.Lys3326Ter | 1492 | 1549 | 0.96             | nonsense     | NM_000059              | c.A9976T          | 0.006459 | 0.01   | rs1571833   | 925  | 567  | 6    | Deleterious             | LoF                  |
| PR-102 | 1    | PTPN11  | chr12:112888156 | AAC        | A    | p.Thr59fs    | 502  | 1988 | 0.25             | fsDel        | NM_002834              | c.173_174del      | NA       | NA     | NA          | 253  | 249  | 2    | NA                      | NA                   |
| PR-105 |      | TP53    | chr17:7579416   | AGGAGGGGCT | A    | p.Ala88fs    | 858  | 1033 | 0.83             | fsDel        | NM_000546              | c.261_270del      | NA       | NA     | NA          | 548  | 310  | 2    | Deleterious             | LoF                  |
| PR-106 | 1    | BRCA2   | chr13:32972626  | A          | T    | p.Lys3326Ter | 871  | 905  | 0.96             | nonsense     | NM_000059              | c.A9976T          | 0.006459 | 0.01   | rs1571833   | 546  | 325  | 6    | Deleterious             | LoF                  |
| PR-107 |      | BRCA2   | chr13:32953629  | A          | T    | p.Tyr297Phe  | 1065 | 1737 | 0.61             | missense     | NM_000059              | c.A8930T          | NA       | NA     | NA          | 546  | 519  | 1    | NA                      | NA                   |
| PR-110 |      | PTEN    | chr10:89711999  | T          | TCGA | p.Ser207fs   | 971  | 1957 | 0.50             | fsIns        | NM_000314              | c.617_618insCA    | NA       | NA     | NA          | 534  | 437  | 1    | Deleterious             | LoF                  |
| PR-110 |      | TSC2    | chr16:2111996   | C          | T    | p.Ala415Val  | 339  | 618  | 0.55             | missense     | NM_000548              | c.C1244T          | 0.000231 | NA     | NA          | 294  | 45   | 1    | NA                      | NA                   |
| PR-111 |      | APC     | chr5:112179359  | G          | A    | p.Ala2690Thr | 967  | 1965 | 0.49             | missense     | NM_000038              | c.G8068A          | 0.000692 | 0.0023 | rs140868933 | 487  | 480  | 2    | NA                      | NA                   |
| PR-112 |      | CTNNB1  | chr3:41266100   | T          | C    | p.Ser33Pro   | 234  | 1999 | 0.12             | missense     | NM_001904              | c.T97C            | NA       | NA     | NA          | 93   | 141  | 1    | Hotspot                 | GoF                  |
| PR-114 |      | RET     | chr10:43609969  | G          | A    | p.Ala641Thr  | 369  | 731  | 0.50             | missense     | NM_020630              | c.G1921A          | NA       | NA     | NA          | 132  | 237  | 1    | NA                      | NA                   |
| PR-115 | 8    | APC     | chr5:112173475  | T          | A    | p.Asn728Lys  | 492  | 1994 | 0.25             | missense     | NM_000038              | c.T2184A          | NA       | NA     | NA          | 256  | 236  | 1    | NA                      | NA                   |
| PR-115 | 8    | APC     | chr5:112154781  | G          | T    | p.Gly351Val  | 535  | 1999 | 0.27             | missense     | NM_000038              | c.G1052T          | NA       | NA     | NA          | 196  | 339  | 2    | NA                      | NA                   |
| PR-115 | 8    | APC     | chr5:112173978  | C          | T    | p.Ala896Val  | 548  | 2000 | 0.27             | missense     | NM_000038              | c.C2687T          | NA       | NA     | NA          | 272  | 276  | 2    | NA                      | NA                   |
| PR-115 | 8    | APC     | chr5:112178751  | G          | T    | p.Ser2487Phe | 594  | 1999 | 0.30             | missense     | NM_000038              | c.C7460T          | NA       | NA     | NA          | 317  | 277  | 3    | NA                      | NA                   |
| PR-115 | 8    | APC     | chr5:112164669  | C          | T    | p.Lys581Asn  | 379  | 1271 | 0.30             | missense     | NM_000038              | c.G1743T          | NA       | NA     | NA          | 173  | 206  | 2    | NA                      | NA                   |
| PR-115 | 8    | APEX1   | chr14:20924079  | A          | G    | p.Glu22Gly   | 183  | 697  | 0.26             | missense     | NM_001641              | c.A65G            | NA       | NA     | NA          | 91   | 92   | 1    | NA                      | NA                   |
| PR-115 | 8    | ATM     | chr11:108098418 | C          | T    | p.Arg23Ter   | 202  | 1318 | 0.15             | nonsense     | NM_000051              | c.C67T            | NA       | NA     | NA          | 113  | 89   | 1    | Deleterious             | LoF                  |
| PR-115 | 8    | ATP11B  | chr3:182616432  | A          | G    | p.Ile1064Val | 251  | 907  | 0.28             | missense     | NM_014616              | c.A3190G          | NA       | NA     | NA          | 125  | 126  | 1    | NA                      | NA                   |
| PR-115 | 8    | BAP1    | chr3:52440884   | C          | T    | p.Arg207Gln  | 317  | 1183 | 0.27             | missense     | NM_004656              | c.G620A           | NA       | NA     | NA          | 151  | 166  | 2    | NA                      | NA                   |
| PR-115 | 8    | BRAF    | chr7:140481448  | C          | T    | p.Asp454Asn  | 604  | 1999 | 0.30             | missense     | NM_004333              | c.G1360A          | NA       | NA     | NA          | 325  | 279  | 1    | NA                      | NA                   |
| PR-115 | 8    | BRCA1   | chr17:41243865  | C          | T    | p.His1228Arg | 543  | 1999 | 0.27             | missense     | NM_007294              | c.A3683G          | NA       | NA     | NA          | 266  | 277  | 1    | NA                      | NA                   |
| PR-115 | 8    | BRCA1   | chr17:41244567  | G          | C    | p.Cys994Tyr  | 557  | 1994 | 0.28             | missense     | NM_007294              | c.G2981A          | NA       | NA     | NA          | 193  | 364  | 1    | NA                      | NA                   |
| PR-115 | 8    | BRCA1   | chr17:41245564  | C          | A    | p.His662Tyr  | 563  | 1999 | 0.28             | missense     | NM_007294              | c.C1984T          | NA       | NA     | NA          | 256  | 307  | 1    | NA                      | NA                   |
| PR-115 | 8    | CDH1    | chr16:68842438  | G          | GA   | p.Gly169fs   | 529  | 1995 | 0.27             | fsIns        | NM_004360              | c.500dupA         | NA       | NA     | NA          | 257  | 272  | 5    | Deleterious             | LoF                  |
| PR-115 | 8    | CDH1    | chr16:68867370  | G          | A    | p.Ala873Thr  | 284  | 1062 | 0.27             | missense     | NM_004360              | c.G2617A          | NA       | NA     | NA          | 189  | 95   | 2    | NA                      | NA                   |
| PR-115 | 8    | EGFR    | chr7:55210105   | G          | T    | p.Arg72Met   | 516  | 1997 | 0.26             | missense     | NM_005228              | c.G215T           | NA       | NA     | NA          | 245  | 271  | 2    | NA                      | NA                   |
| PR-115 | 8    | EGFR    | chr7:55241704   | C          | A    | p.Leu718Met  | 250  | 939  | 0.27             | missense     | NM_005228              | c.C2152A          | NA       | NA     | NA          | 135  | 115  | 1    | Hotspot                 | GoF                  |
| PR-115 | 8    | ERBB2   | chr17:37882881  | C          | T    | p.Ala980Val  | 208  | 755  | 0.28             | missense     | NM_004448              | c.C2939T          | NA       | NA     | NA          | 92   | 116  | 2    | NA                      | NA                   |
| PR-115 | 8    | GAS6    | chr13:114535617 | G          | A    | p.Gln315Ter  | 184  | 622  | 0.30             | nonsense     | NM_000820              | c.C943T           | NA       | NA     | NA          | 79   | 105  | 1    | NA                      | NA                   |
| PR-115 | 8    | GATA2   | chr3:128200781  | C          | T    | p.Ala342Thr  | 193  | 783  | 0.25             | missense     | NM_032638              | c.G1024A          | NA       | NA     | NA          | 99   | 94   | 1    | NA                      | NA                   |
| PR-115 | 8    | GATA3   | chr10:8100349   | C          | T    | p.Thr108Ile  | 181  | 858  | 0.21             | missense     | NM_002051              | c.C323T           | NA       | NA     | NA          | 88   | 93   | 2    | NA                      | NA                   |
| PR-115 | 8    | MSH2    | chr2:47627291   | G          | A    | p.Asp461Asn  | 694  | 2000 | 0.35             | missense     | NM_000251              | c.G1381A          | NA       | NA     | NA          | 292  | 402  | 2    | NA                      | NA                   |
| PR-115 | 8    | NF1     | chr17:29527461  | C          | T    | p.Arg304Ter  | 248  | 936  | 0.27             | nonsense     | NM_000267              | c.C910T           | NA       | NA     | NA          | 207  | 41   | 1    | Deleterious             | LoF                  |
| PR-115 | 8    | NF1     | chr17:29587497  | A          | T    | p.Asn1514Ile | 26   | 91   | 0.29             | missense     | NM_000267              | c.A4478T          | NA       | NA     | NA          | 10   | 16   | 2    | NA                      | NA                   |
| PR-115 | 8    | NF1     | chr17:29676195  | T          | C    | p.Leu2416Pro | 603  | 1996 | 0.30             | missense     | NM_000267              | c.T7184C          | NA       | NA     | NA          | 289  | 314  | 1    | NA                      | NA                   |
| PR-115 | 8    | NF1     | chr17:29565285  | G          | T    | p.Glu884Asp  | 615  | 1997 | 0.31             | missense     | NM_000267              | c.G2652T          | NA       | NA     | NA          | 261  | 354  | 3    | NA                      | NA                   |
| PR-115 | 8    | NOTCH1  | chr9:139391798  | GC         | G    | p.Gly2131fs  | 23   | 62   | 0.37             | fsDel        | NM_017617              | c.6392delG        | NA       | NA     | NA          | 9    | 14   | 6    | Deleterious             | LoF                  |
| PR-115 | 8    | PIK3CA  | chr3:178916887  | C          | A    | p.Leu92Ile   | 494  | 1964 | 0.25             | missense     | NM_006218              | c.C274A           | NA       | NA     | NA          | 303  | 191  | 2    | NA                      | NA                   |
| PR-115 | 8    | PIK3CA  | chr3:178927980  | T          | C    | p.Cys420Arg  | 506  | 1999 | 0.25             | missense     | NM_006218              | c.T1258C          | NA       | NA     | rs121913272 | 205  | 301  | 1    | Hotspot                 | GoF                  |
| PR-115 | 8    | PIK3R1  | chr5:67589609   | GA         | GA   | p.Ser460fs   | 401  | 1977 | 0.20             | fsIns        | NM_181504              | c.563dupA         | NA       | NA     | NA          | 254  | 147  | 6    | Deleterious             | LoF                  |
| PR-115 | 8    | PTEN    | chr10:89624241  | CAA        | CAA  | p.Lysfs      | 511  | 1748 | 0.29             | fsDel        | NM_000314              | c.16_17del        | NA       | NA     | NA          | 196  | 315  | 3    | Deleterious             | LoF                  |
| PR-115 | 8    | RB1     | chr13:48955538  | C          | T    | p.Arg552Ter  | 441  | 2000 | 0.22             | nonsense     | NM_000321              | c.C1654T          | NA       | NA     | rs121913303 | 210  | 231  | 1    | Deleterious             | LoF                  |
| PR-115 | 8    | SMARCB1 | chr22:24129449  | G          | T    | p.Glu31Asp   | 56   | 180  | 0.31             | missense     | NM_003073              | c.G93T            | NA       | NA     | NA          | 28   | 28   | 2    | NA                      | NA                   |
| PR-115 | 8    | TET2    | chr4:106155220  | C          | T    | p.Pro41Ser   | 397  | 1387 | 0.29             | missense     | NM_017628              | c.C121T           | NA       | NA     | NA          | 144  | 253  | 2    | NA                      | NA                   |
| PR-115 | 8    | TET2    | chr4:106155620  | C          | A    | p.Pro174His  | 724  | 1428 | 0.51             | missense     | NM_017628              | c.C521A           | 0.001076 | 0.0009 | rs146031219 | 296  | 428  | 2    | NA                      | NA                   |
| PR-115 | 8    | TSC1    | chr9:135771987  | G          | CGCT | p.Ser1043dup | 120  | 568  | 0.21             | nontfsIns    | NM_000368              | c.3129_3130insAGC | NA       | NA     | NA          | 69   | 51   | 1    | NA                      | NA                   |
| PR-115 | 8    | TSC2    | chr16:2133712   | G          | A    | p.Met1300Ile | 51   | 146  | 0.35             | missense     | NM_000548              | c.G3900A          | NA       | NA     | NA          | 28   | 23   | 2    | NA                      | NA                   |
| PR-116 |      | ATM     | chr11:108139187 | T          | A    | p.Phe897Ile  | 1100 | 2000 | 0.55             | missense     | NM_000051              | c.T2689A          | 0.000077 | NA     | rs147122522 | 660  | 440  | 4    | NA                      | NA                   |
| PR-120 |      | MSH2    | chr2:47635615   | G          | A    | p.Arg96His   | 589  | 1269 | 0.46             | missense     | NM_000251              | c.G287A           | NA       | NA     | rs63750002  | 249  | 340  | 1    | NA                      | NA                   |
| PR-121 |      | SPOP    | chr17:47696426  | A          | C    | p.Phe133Val  | 181  | 738  | 0.23             | missense     | NM_003563              | c.T397G           | NA       | NA     | NA          | 162  | 19   | 2    | Hotspot                 | GoF                  |
| PR-122 |      | IDH1    | chr2:209113112  | C          | T    | p.Arg132His  | 314  | 1743 |                  |              |                        |                   |          |        |             |      |      |      |                         |                      |

| Sample | Pair | Gene           | Location        | Ref | Alt   | AA Change    | FAO  | FDP  | Variant Fraction | Variant Type | Transcript ID (RefSeq) | Nucleotide Change | ESP      | 1000G  | db135       | FSAF | FSAR | HRUN | Onconome Variant Class | Onconome Gene Class |
|--------|------|----------------|-----------------|-----|-------|--------------|------|------|------------------|--------------|------------------------|-------------------|----------|--------|-------------|------|------|------|------------------------|---------------------|
| PR-135 |      | <i>BRCA2</i>   | chr13:32913562  | A   | C     | p.Lys1690Asn | 551  | 1093 | 0.50             | missense     | NM_000059              | c.A5070C          | 0.000155 | NA     | rs56087561  | 291  | 260  | 7    | NA                     | NA                  |
| PR-135 |      | <i>MET</i>     | chr7:116415148  | A   | C     | p.Asn1099Ser | 553  | 1108 | 0.50             | missense     | NM_000245              | c.A3242G          | NA       | NA     | NA          | 235  | 318  | 2    | NA                     | NA                  |
| PR-136 |      | <i>CDH1</i>    | chr16:68771326  | C   | G     | p.Pro3Arg    | 573  | 768  | 0.75             | missense     | NM_004360              | c.C8G             | NA       | NA     | NA          | 256  | 317  | 3    | NA                     | NA                  |
| PR-136 |      | <i>NF1</i>     | chr17:29560209  | A   | G     | p.Asn1229Ser | 947  | 1998 | 0.47             | missense     | NM_000267              | c.A3686G          | 0.000154 | NA     | rs140523180 | 421  | 522  | 2    | NA                     | NA                  |
| PR-136 |      | <i>PTEN</i>    | chr10:89725053  | T   | G     | p.Tyr346Asp  | 809  | 1739 | 0.47             | missense     | NM_000314              | c.T1036G          | NA       | NA     | NA          | 439  | 370  | 1    | NA                     | NA                  |
| PR-136 |      | <i>RET</i>     | chr10:43615601  | G   | A     | p.Gly89Ser   | 167  | 1999 | 0.08             | missense     | NM_020630              | c.G2680A          | NA       | NA     | NA          | 97   | 70   | 2    | NA                     | NA                  |
| PR-142 |      | <i>MCL1</i>    | chr11:150551416 | C   | A     | p.Lys197Asn  | 998  | 1992 | 0.50             | missense     | NM_021980              | c.G591T           | NA       | NA     | NA          | 523  | 475  | 1    | NA                     | NA                  |
| PR-145 |      | <i>NF1</i>     | chr17:29598455  |     | TTAAA | p.Phe201fs   | 423  | 435  | 0.37             | fsDel        | NM_000267              | c.602_606TAA      | NA       | NA     | NA          | 1    | 422  | 3    | Deleterious            | LoF                 |
| PR-145 |      | <i>TET2</i>    | chr4:106155620  | C   | A     | p.Pro174His  | 546  | 1110 | 0.49             | missense     | NM_017528              | c.C521A           | 0.001076 | 0.0009 | rs146031219 | 261  | 285  | 2    | NA                     | NA                  |
| PR-146 |      | <i>BRCA2</i>   | chr13:32899234  | A   | C     | p.Arg113Lys  | 37   | 174  | 0.21             | missense     | NM_000059              | c.G338A           | NA       | NA     | NA          | 18   | 19   | 1    | NA                     | NA                  |
| PR-146 |      | <i>TP53</i>    | chr17:7578461   | C   | A     | p.Val157Phe  | 621  | 1264 | 0.49             | missense     | NM_000546              | c.G469T           | NA       | NA     | rs121912654 | 293  | 328  | 1    | Hotspot                | LoF                 |
| PR-148 |      | <i>JK2</i>     | chr9:5072561    | G   | T     | p.Gly571Ser  | 271  | 419  | 0.65             | missense     | NM_004972              | c.G1711A          | 0.000692 | NA     | rs139504737 | 138  | 133  | 2    | Hotspot                | GoF                 |
| PR-149 |      | <i>DNMT3A</i>  | chr2:25467508   | T   | C     | p.Glu523Gly  | 18   | 353  | 0.05             | missense     | NM_022552              | c.A1568G          | NA       | NA     | NA          | 0    | 18   | 1    | NA                     | NA                  |
| PR-149 |      | <i>GATA3</i>   | chr10:8097734   | G   | T     | p.Ala39Val   | 46   | 350  | 0.13             | missense     | NM_020251              | c.C116T           | NA       | NA     | NA          | 13   | 33   | 1    | NA                     | NA                  |
| PR-149 |      | <i>MYC</i>     | chr8:128750527  | T   | C     | p.Phe22Leu   | 607  | 1999 | 0.30             | missense     | NM_002467              | c.T64C            | 0.002307 | 0.0005 | rs146505192 | 291  | 316  | 2    | NA                     | NA                  |
| PR-154 |      | <i>BRCA1</i>   | chr17:41234463  | G   | A     | p.Leu1439Phe | 975  | 1999 | 0.49             | missense     | NM_007294              | c.C4315T          | NA       | NA     | NA          | 507  | 468  | 3    | NA                     | NA                  |
| PR-158 |      | <i>NOTCH1</i>  | chr9:139399186  | G   | A     | p.Leu1653Phe | 6    | 60   | 0.10             | missense     | NM_017617              | c.C4957T          | NA       | NA     | NA          | 3    | 3    | 1    | NA                     | NA                  |
| PR-159 |      | <i>APC</i>     | chr5:112178942  | G   | C     | p.His2551Asn | 519  | 1736 | 0.30             | missense     | NM_000038              | c.C7651A          | NA       | NA     | NA          | 276  | 243  | 1    | NA                     | NA                  |
| PR-159 |      | <i>BRCA1</i>   | chr17:41243509  | T   | C     | p.Arg1347Gly | 1003 | 1997 | 0.50             | missense     | NM_007294              | c.A4039G          | 0.004844 | 0.0009 | rs28897689  | 525  | 478  | 3    | NA                     | NA                  |
| PR-159 |      | <i>HRAS</i>    | chr11:533874    | T   | C     | p.Gln61Arg   | 1444 | 1997 | 0.72             | missense     | NM_005343              | c.A182G           | NA       | NA     | rs121913233 | 808  | 636  | 1    | Hotspot                | GoF                 |
| PR-159 |      | <i>PIK3CA</i>  | chr3:178936082  | G   | A     | p.Glu542Lys  | 1101 | 1909 | 0.58             | missense     | NM_006218              | c.G1624A          | NA       | NA     | rs121913273 | 511  | 590  | 1    | Hotspot                | GoF                 |
| PR-159 |      | <i>TP53</i>    | chr17:7577058   | C   | A     | p.Glu294Ter  | 1771 | 1994 | 0.89             | nonsense     | NM_000546              | c.G880T           | NA       | NA     | NA          | 1022 | 749  | 4    | Deleterious            | LoF                 |
| PR-160 |      | <i>MYO18A</i>  | chr17:27424848  | G   | A     | p.Arg1354Trp | 923  | 1845 | 0.50             | missense     | NM_078471              | c.A4060T          | 0.001423 | NA     | C5069       | 509  | 414  | 2    | NA                     | NA                  |
| PR-160 |      | <i>NOTCH1</i>  | chr9:139401189  | C   | T     | p.Glu1294Lys | 149  | 253  | 0.59             | missense     | NM_017617              | c.G3880A          | NA       | NA     | NA          | 58   | 91   | 1    | NA                     | NA                  |
| PR-160 |      | <i>TP53</i>    | chr17:7577538   | C   | T     | p.Arg248Gln  | 743  | 1082 | 0.69             | missense     | NM_000546              | c.G743A           | 0.000077 | NA     | rs1540652   | 409  | 334  | 2    | Hotspot                | LoF                 |
| PR-161 | 8    | <i>APC</i>     | chr5:112154781  | G   | T     | p.Gly351Val  | 602  | 1998 | 0.30             | missense     | NM_000038              | c.G1052T          | NA       | NA     | NA          | 244  | 358  | 2    | NA                     | NA                  |
| PR-161 | 8    | <i>APC</i>     | chr5:112173978  | T   | C     | p.Ala896Val  | 624  | 2000 | 0.31             | missense     | NM_000038              | c.C2687T          | NA       | NA     | NA          | 287  | 337  | 2    | NA                     | NA                  |
| PR-161 | 8    | <i>APC</i>     | chr5:112173475  | T   | A     | p.Asn728Lys  | 631  | 1998 | 0.32             | missense     | NM_000038              | c.T2184A          | NA       | NA     | NA          | 294  | 337  | 1    | NA                     | NA                  |
| PR-161 | 8    | <i>APC</i>     | chr5:112178751  | C   | A     | p.Ser2487Phe | 671  | 2000 | 0.34             | missense     | NM_000038              | c.C7460T          | NA       | NA     | NA          | 342  | 329  | 3    | NA                     | NA                  |
| PR-161 | 8    | <i>APC</i>     | chr5:112164669  | G   | T     | p.Lys581Asn  | 327  | 925  | 0.35             | missense     | NM_000038              | c.G1743T          | NA       | NA     | NA          | 131  | 196  | 2    | NA                     | NA                  |
| PR-161 | 8    | <i>APEX1</i>   | chr14:20924079  | A   | G     | p.Glu22Gly   | 380  | 1072 | 0.35             | missense     | NM_001641              | c.A65G            | NA       | NA     | NA          | 231  | 149  | 1    | NA                     | NA                  |
| PR-161 | 8    | <i>ATM</i>     | chr11:108098418 | C   | T     | p.Arg23Ter   | 348  | 1999 | 0.17             | nonsense     | NM_000051              | c.C67T            | NA       | NA     | NA          | 176  | 172  | 1    | Deleterious            | LoF                 |
| PR-161 | 8    | <i>ATP11B</i>  | chr3:182616432  | A   | G     | p.Ile1064Val | 192  | 567  | 0.34             | missense     | NM_014616              | c.A3190G          | NA       | NA     | NA          | 83   | 109  | 1    | NA                     | NA                  |
| PR-161 | 8    | <i>BAP1</i>    | chr3:52440884   | C   | T     | p.Arg207Gln  | 680  | 1999 | 0.34             | missense     | NM_004656              | c.G620A           | NA       | NA     | NA          | 424  | 356  | 2    | NA                     | NA                  |
| PR-161 | 8    | <i>BRAF</i>    | chr7:140481448  | C   | T     | p.Asp454Asn  | 723  | 2000 | 0.36             | missense     | NM_004333              | c.G1360A          | NA       | NA     | NA          | 313  | 310  | 1    | NA                     | NA                  |
| PR-161 | 8    | <i>BRCA1</i>   | chr17:41244567  | C   | T     | p.Cys994Tyr  | 592  | 1995 | 0.30             | missense     | NM_007294              | c.G2981A          | NA       | NA     | NA          | 236  | 356  | 1    | NA                     | NA                  |
| PR-161 | 8    | <i>BRCA1</i>   | chr17:41245564  | G   | A     | p.His662Tyr  | 619  | 1998 | 0.31             | missense     | NM_007294              | c.C1984T          | NA       | NA     | NA          | 298  | 321  | 1    | NA                     | NA                  |
| PR-161 | 8    | <i>BRCA1</i>   | chr17:41243865  | T   | C     | p.His1228Arg | 643  | 2000 | 0.32             | missense     | NM_007294              | c.A3683G          | NA       | NA     | NA          | 311  | 332  | 1    | NA                     | NA                  |
| PR-161 | 8    | <i>CDH1</i>    | chr16:68867370  | G   | A     | p.Ala873Thr  | 609  | 2000 | 0.30             | missense     | NM_004360              | c.G2617A          | NA       | NA     | NA          | 378  | 231  | 2    | NA                     | NA                  |
| PR-161 | 8    | <i>EGFR</i>    | chr7:55241704   | C   | A     | p.Leu718Met  | 568  | 1745 | 0.33             | missense     | NM_005228              | c.C2152A          | NA       | NA     | NA          | 311  | 257  | 1    | Hotspot                | GoF                 |
| PR-161 | 8    | <i>ERBB2</i>   | chr17:37882881  | C   | T     | p.Ala980Val  | 428  | 1397 | 0.31             | missense     | NM_004448              | c.C2939T          | NA       | NA     | NA          | 193  | 235  | 2    | NA                     | NA                  |
| PR-161 | 8    | <i>GAS6</i>    | chr13:114535617 | G   | A     | p.Gln315Ter  | 460  | 1514 | 0.30             | nonsense     | NM_000820              | c.C943T           | NA       | NA     | NA          | 203  | 257  | 1    | NA                     | NA                  |
| PR-161 | 8    | <i>GATA2</i>   | chr3:128200781  | C   | T     | p.Ala342Thr  | 454  | 1663 | 0.27             | missense     | NM_032638              | c.G1024A          | NA       | NA     | NA          | 238  | 216  | 1    | NA                     | NA                  |
| PR-161 | 8    | <i>GATA3</i>   | chr10:8100349   | C   | T     | p.Thr108Ile  | 585  | 1981 | 0.30             | missense     | NM_002051              | c.C323T           | NA       | NA     | NA          | 352  | 233  | 2    | NA                     | NA                  |
| PR-161 | 8    | <i>KDR</i>     | chr4:55972873   | A   | G     | p.Leu506Pro  | 105  | 272  | 0.39             | missense     | NM_002253              | c.T1517C          | NA       | NA     | NA          | 50   | 55   | 1    | NA                     | NA                  |
| PR-161 | 8    | <i>MSH2</i>    | chr2:47672791   | G   | A     | p.Asp461Asn  | 589  | 1325 | 0.44             | missense     | NM_000251              | c.G1381A          | NA       | NA     | NA          | 283  | 306  | 2    | NA                     | NA                  |
| PR-161 | 8    | <i>MTOR</i>    | chr1:11217258   | G   | A     | p.Pro1474Ser | 145  | 2000 | 0.07             | missense     | NM_004958              | c.C4420T          | NA       | NA     | NA          | 75   | 70   | 3    | NA                     | NA                  |
| PR-161 | 8    | <i>NF1</i>     | chr17:2956285   | G   | T     | p.Glu884Asp  | 571  | 1999 | 0.29             | missense     | NM_000267              | c.C6252T          | NA       | NA     | NA          | 257  | 314  | 3    | NA                     | NA                  |
| PR-161 | 8    | <i>NF1</i>     | chr17:29676195  | T   | C     | p.Leu2416Pro | 588  | 1995 | 0.29             | missense     | NM_000267              | c.T7184C          | NA       | NA     | NA          | 272  | 316  | 1    | NA                     | NA                  |
| PR-161 | 8    | <i>NF1</i>     | chr17:29587497  | A   | C     | p.Asn1514Ile | 27   | 75   | 0.36             | missense     | NM_000267              | c.A4478T          | NA       | NA     | NA          | 8    | 19   | 2    | NA                     | NA                  |
| PR-161 | 8    | <i>PIK3CA</i>  | chr3:178916887  | C   | A     | p.Leu92Ile   | 585  | 1977 | 0.30             | missense     | NM_006218              | c.C274A           | NA       | NA     | NA          | 311  | 274  | 2    | NA                     | NA                  |
| PR-161 | 8    | <i>PIK3CA</i>  | chr3:178927980  | T   | C     | p.Cys420Arg  | 388  | 1306 | 0.30             | missense     | NM_006218              | c.T1258C          | NA       | NA     | rs121913272 | 167  | 221  | 1    | Hotspot                | GoF                 |
| PR-161 | 8    | <i>PTCH1</i>   | chr9:96248120   | C   | T     | p.Arg144His  | 430  | 1999 | 0.22             | missense     | NM_000264              | c.G431A           | NA       | NA     | NA          | 169  | 261  | 1    | NA                     | NA                  |
| PR-161 | 8    | <i>PTEN</i>    | chr10:89624241  | CAA | C     | p.Lys9fs     | 606  | 1994 | 0.30             | fsDel        | NM_000314              | c.16_17del        | NA       | NA     | NA          | 267  | 339  | 3    | Deleterious            | LoF                 |
| PR-161 | 8    | <i>SMARCB1</i> | chr22:24129449  | G   | T     | p.Glu31Asp   | 171  | 447  | 0.38             | missense     | NM_000373              | c.G93T            | NA       | NA     | NA          | 92   | 79   | 2    | NA                     | NA                  |
| PR-161 | 8    | <i>STK11</i>   | chr19:1219412   | C   | T     | p.Gly155Val  | 24   | 83   | 0.29             | missense     | NM_000455              | c.G464T           | NA       | NA     | NA          | 24   | 0    | 3    | NA                     | NA                  |
| PR-161 | 8    | <i>TET2</i>    | chr4:106155620  | C   | T     | p.Pro41Ser   | 412  | 1216 | 0.24             | missense     | NM_017628              | c.C121T           | NA       | NA     | NA          | 171  | 241  | 2    | NA                     | NA                  |
| PR-161 | 8    | <i>TET2</i>    | chr4:106155620  | C   | A     | p.Pro174His  | 534  | 1120 | 0.48             | missense     | NM_017628              | c.C521A           | 0.001076 | 0.0009 | rs146031219 | 236  | 298  | 2    | NA                     | NA                  |
| PR-161 | 8    | <i>TSC1</i>    | chr9:135771987  |     | CGCT  | p.Ser1043dup | 346  | 1325 | 0.26             | nonfsIns     | NM_000368              | c.3129_3130insAGC | NA       | NA     | NA          | 154  | 192  | 1    | NA                     | NA                  |
| PR-161 | 8    | <i>TSC2</i>    | chr16:2133712   | G   | A     | p.Met1300Ile | 79   | 491  | 0.16</           |              |                        |                   |          |        |             |      |      |      |                        |                     |

**Table S10: High-level prioritized OCP identified copy number alterations (CNAs) across MO/LU/PR cohorts**

| Sample | Gene          | Copy Number Ratio | Copy Number Ratio (log <sub>2</sub> ) | Number of Probes | Gain/Loss |
|--------|---------------|-------------------|---------------------------------------|------------------|-----------|
| MO-3   | <i>ERBB2</i>  | 2.20              | 1.1                                   | 26               | Gain      |
| MO-3   | <i>MDM2</i>   | 2.13              | 1.1                                   | 14               | Gain      |
| MO-3   | <i>MCL1</i>   | 1.90              | 0.9                                   | 17               | Gain      |
| MO-4   | <i>APC</i>    | 0.47              | -1.1                                  | 116              | Loss      |
| MO-4   | <i>CDKN2A</i> | 0.40              | -1.3                                  | 11               | Loss      |
| MO-5   | <i>SMAD4</i>  | 0.45              | -1.2                                  | 9                | Loss      |
| MO-6   | <i>MYC</i>    | 1.89              | 0.9                                   | 11               | Gain      |
| MO-6   | <i>GAS6</i>   | 1.76              | 0.8                                   | 22               | Gain      |
| MO-8   | <i>CDK6</i>   | 2.25              | 1.2                                   | 15               | Gain      |
| MO-8   | <i>IL6</i>    | 2.20              | 1.1                                   | 17               | Gain      |
| MO-8   | <i>BCL2L1</i> | 1.99              | 1.0                                   | 18               | Gain      |
| MO-8   | <i>MYC</i>    | 1.96              | 1.0                                   | 11               | Gain      |
| MO-8   | <i>MTOR</i>   | 1.95              | 1.0                                   | 4                | Gain      |
| MO-8   | <i>EGFR</i>   | 1.79              | 0.8                                   | 33               | Gain      |
| MO-8   | <i>SMO</i>    | 1.78              | 0.8                                   | 6                | Gain      |
| MO-8   | <i>MET</i>    | 1.77              | 0.8                                   | 25               | Gain      |
| MO-8   | <i>CDKN2A</i> | 0.11              | -3.2                                  | 11               | Loss      |
| MO-10  | <i>MYC</i>    | 2.46              | 1.3                                   | 11               | Gain      |
| MO-11  | <i>ATM</i>    | 0.39              | -1.3                                  | 146              | Loss      |
| MO-11  | <i>CDKN2A</i> | 0.07              | -3.9                                  | 11               | Loss      |
| MO-16  | <i>MYC</i>    | 1.82              | 0.9                                   | 11               | Gain      |
| MO-16  | <i>BCL2L1</i> | 1.79              | 0.8                                   | 18               | Gain      |
| MO-17  | <i>CDKN2A</i> | 0.41              | -1.3                                  | 11               | Loss      |
| MO-19  | <i>MCL1</i>   | 1.98              | 1.0                                   | 17               | Gain      |
| MO-19  | <i>MDM2</i>   | 1.94              | 1.0                                   | 14               | Gain      |
| MO-20  | <i>BCL2L1</i> | 2.65              | 1.4                                   | 18               | Gain      |
| MO-20  | <i>NKX2-1</i> | 2.21              | 1.1                                   | 7                | Gain      |
| MO-22  | <i>MYC</i>    | 2.33              | 1.2                                   | 11               | Gain      |
| MO-24  | <i>ZNF217</i> | 1.83              | 0.9                                   | 18               | Gain      |
| MO-27  | <i>MDM4</i>   | 3.22              | 1.7                                   | 20               | Gain      |
| MO-27  | <i>MCL1</i>   | 2.75              | 1.5                                   | 17               | Gain      |
| MO-27  | <i>BCL9</i>   | 2.61              | 1.4                                   | 19               | Gain      |
| MO-27  | <i>DDR2</i>   | 2.51              | 1.3                                   | 8                | Gain      |
| MO-27  | <i>IL6</i>    | 1.78              | 0.8                                   | 17               | Gain      |
| MO-27  | <i>CDKN2A</i> | 0.09              | -3.4                                  | 11               | Loss      |
| MO-28  | <i>MCL1</i>   | 2.69              | 1.4                                   | 17               | Gain      |
| MO-28  | <i>BCL9</i>   | 1.89              | 0.9                                   | 19               | Gain      |
| MO-28  | <i>ERBB2</i>  | 1.79              | 0.8                                   | 26               | Gain      |
| MO-28  | <i>MDM2</i>   | 1.76              | 0.8                                   | 14               | Gain      |
| MO-28  | <i>SMAD4</i>  | 0.43              | -1.2                                  | 9                | Loss      |
| MO-28  | <i>CDKN2A</i> | 0.28              | -1.9                                  | 11               | Loss      |
| MO-29  | <i>MDM2</i>   | 12.54             | 3.6                                   | 14               | Gain      |
| MO-29  | <i>CDK4</i>   | 5.74              | 2.5                                   | 15               | Gain      |
| MO-29  | <i>EGFR</i>   | 2.41              | 1.3                                   | 33               | Gain      |

| Sample | Gene          | Copy Number Ratio | Copy Number Ratio (log <sub>2</sub> ) | Number of Probes | Gain/Loss |
|--------|---------------|-------------------|---------------------------------------|------------------|-----------|
| MO-29  | <i>IL6</i>    | 1.83              | 0.9                                   | 17               | Gain      |
| MO-30  | <i>MDM4</i>   | 1.95              | 1.0                                   | 20               | Gain      |
| MO-32  | <i>NKX2-1</i> | 9.56              | 3.3                                   | 7                | Gain      |
| MO-32  | <i>FGFR4</i>  | 2.31              | 1.2                                   | 19               | Gain      |
| MO-32  | <i>TERT</i>   | 2.02              | 1.0                                   | 14               | Gain      |
| MO-32  | <i>GAS6</i>   | 1.90              | 0.9                                   | 22               | Gain      |
| MO-32  | <i>AKT1</i>   | 1.90              | 0.9                                   | 17               | Gain      |
| MO-32  | <i>MDM4</i>   | 1.89              | 0.9                                   | 20               | Gain      |
| MO-32  | <i>MYC</i>    | 1.88              | 0.9                                   | 11               | Gain      |
| MO-33  | <i>BIRC3</i>  | 1.96              | 1.0                                   | 15               | Gain      |
| MO-33  | <i>CCND1</i>  | 1.93              | 1.0                                   | 18               | Gain      |
| MO-33  | <i>IGF1R</i>  | 1.87              | 0.9                                   | 19               | Gain      |
| MO-33  | <i>BIRC2</i>  | 1.79              | 0.8                                   | 16               | Gain      |
| MO-33  | <i>MYC</i>    | 1.78              | 0.8                                   | 11               | Gain      |
| MO-33  | <i>SMAD4</i>  | 0.48              | -1.0                                  | 9                | Loss      |
| MO-33  | <i>CDKN2A</i> | 0.34              | -1.6                                  | 11               | Loss      |
| MO-37  | <i>SMO</i>    | 1.78              | 0.8                                   | 6                | Gain      |
| MO-39  | <i>GAS6</i>   | 1.83              | 0.9                                   | 22               | Gain      |
| MO-40  | <i>DDR2</i>   | 2.41              | 1.3                                   | 8                | Gain      |
| MO-40  | <i>MCL1</i>   | 2.32              | 1.2                                   | 17               | Gain      |
| MO-40  | <i>BCL9</i>   | 2.17              | 1.1                                   | 19               | Gain      |
| MO-40  | <i>MDM4</i>   | 2.16              | 1.1                                   | 20               | Gain      |
| MO-40  | <i>IL6</i>    | 1.92              | 0.9                                   | 17               | Gain      |
| MO-40  | <i>CDKN2A</i> | 0.18              | -2.5                                  | 11               | Loss      |
| MO-43  | <i>MYC</i>    | 1.90              | 0.9                                   | 11               | Gain      |
| MO-43  | <i>PTEN</i>   | 0.46              | -1.1                                  | 19               | Loss      |
| MO-43  | <i>CDKN2A</i> | 0.09              | -3.4                                  | 11               | Loss      |
| MO-48  | <i>NKX2-1</i> | 3.38              | 1.8                                   | 7                | Gain      |
| MO-48  | <i>MCL1</i>   | 2.83              | 1.5                                   | 17               | Gain      |
| MO-48  | <i>BCL9</i>   | 2.72              | 1.4                                   | 19               | Gain      |
| MO-48  | <i>AKT1</i>   | 2.47              | 1.3                                   | 17               | Gain      |
| MO-48  | <i>TERT</i>   | 2.23              | 1.2                                   | 14               | Gain      |
| MO-48  | <i>CDKN2A</i> | 0.42              | -1.2                                  | 11               | Loss      |
| MO-49  | <i>AKT1</i>   | 2.23              | 1.2                                   | 17               | Gain      |
| MO-49  | <i>ERBB2</i>  | 2.16              | 1.1                                   | 26               | Gain      |
| MO-49  | <i>NKX2-1</i> | 2.08              | 1.1                                   | 7                | Gain      |
| MO-49  | <i>PNP</i>    | 1.81              | 0.9                                   | 18               | Gain      |
| MO-49  | <i>APEX1</i>  | 1.77              | 0.8                                   | 15               | Gain      |
| MO-50  | <i>GAS6</i>   | 2.41              | 1.3                                   | 22               | Gain      |
| MO-50  | <i>FLT3</i>   | 1.97              | 1.0                                   | 24               | Gain      |
| MO-50  | <i>CD274</i>  | 1.82              | 0.9                                   | 35               | Gain      |
| MO-50  | <i>SMAD4</i>  | 0.34              | -1.5                                  | 9                | Loss      |
| MO-51  | <i>TERT</i>   | 1.93              | 1.0                                   | 14               | Gain      |
| MO-51  | <i>MYC</i>    | 1.89              | 0.9                                   | 11               | Gain      |
| MO-51  | <i>SMAD4</i>  | 0.18              | -2.5                                  | 9                | Loss      |
| MO-52  | <i>MDM2</i>   | 2.25              | 1.2                                   | 14               | Gain      |
| MO-53  | <i>NKX2-1</i> | 2.19              | 1.1                                   | 7                | Gain      |
| MO-53  | <i>BCL9</i>   | 1.97              | 1.0                                   | 19               | Gain      |

| Sample | Gene           | Copy Number Ratio | Copy Number Ratio (log <sub>2</sub> ) | Number of Probes | Gain/Loss |
|--------|----------------|-------------------|---------------------------------------|------------------|-----------|
| MO-54  | <i>MYC</i>     | 3.51              | 1.8                                   | 11               | Gain      |
| MO-54  | <i>MDM2</i>    | 2.93              | 1.6                                   | 14               | Gain      |
| MO-54  | <i>IL6</i>     | 2.22              | 1.1                                   | 17               | Gain      |
| MO-54  | <i>CDK4</i>    | 2.01              | 1.0                                   | 15               | Gain      |
| MO-54  | <i>EGFR</i>    | 2.00              | 1.0                                   | 33               | Gain      |
| MO-54  | <i>TERT</i>    | 1.84              | 0.9                                   | 14               | Gain      |
| MO-54  | <i>MCL1</i>    | 1.83              | 0.9                                   | 17               | Gain      |
| MO-54  | <i>CDKN2A</i>  | 0.22              | -2.2                                  | 11               | Loss      |
| MO-55  | <i>CDKN2A</i>  | 0.33              | -1.6                                  | 11               | Loss      |
| MO-56  | <i>BCL2L1</i>  | 2.44              | 1.3                                   | 18               | Gain      |
| MO-56  | <i>MYC</i>     | 2.27              | 1.2                                   | 11               | Gain      |
| MO-56  | <i>ZNF217</i>  | 2.25              | 1.2                                   | 18               | Gain      |
| MO-56  | <i>FGFR1</i>   | 2.06              | 1.0                                   | 20               | Gain      |
| MO-58  | <i>IGF1R</i>   | 13.92             | 3.8                                   | 19               | Gain      |
| MO-59  | <i>MYC</i>     | 4.73              | 2.2                                   | 11               | Gain      |
| MO-61  | <i>CDKN2A</i>  | 0.37              | -1.4                                  | 11               | Loss      |
| MO-64  | <i>CCND1</i>   | 17.52             | 4.1                                   | 18               | Gain      |
| MO-64  | <i>FGFR1</i>   | 13.90             | 3.8                                   | 20               | Gain      |
| MO-64  | <i>CDK4</i>    | 13.25             | 3.7                                   | 15               | Gain      |
| MO-64  | <i>BCL2L1</i>  | 2.26              | 1.2                                   | 18               | Gain      |
| MO-64  | <i>MYC</i>     | 2.12              | 1.1                                   | 11               | Gain      |
| MO-65  | <i>ERBB2</i>   | 15.74             | 4.0                                   | 26               | Gain      |
| MO-66  | <i>CDKN2A</i>  | 0.39              | -1.3                                  | 11               | Loss      |
| MO-67  | <i>MYC</i>     | 2.99              | 1.6                                   | 11               | Gain      |
| MO-67  | <i>FGFR1</i>   | 2.58              | 1.4                                   | 20               | Gain      |
| MO-67  | <i>MCL1</i>    | 2.56              | 1.4                                   | 17               | Gain      |
| MO-67  | <i>CCNE1</i>   | 2.15              | 1.1                                   | 15               | Gain      |
| MO-67  | <i>ZNF217</i>  | 1.93              | 0.9                                   | 18               | Gain      |
| MO-67  | <i>BCL2L1</i>  | 1.92              | 0.9                                   | 18               | Gain      |
| MO-67  | <i>MDM4</i>    | 1.92              | 0.9                                   | 20               | Gain      |
| MO-67  | <i>CSNK2A1</i> | 1.80              | 0.9                                   | 19               | Gain      |
| MO-71  | <i>BIRC2</i>   | 2.56              | 1.4                                   | 16               | Gain      |
| MO-71  | <i>BIRC3</i>   | 1.88              | 0.9                                   | 15               | Gain      |
| MO-71  | <i>SMAD4</i>   | 0.47              | -1.1                                  | 9                | Loss      |
| MO-71  | <i>CDKN2A</i>  | 0.30              | -1.7                                  | 11               | Loss      |
| MO-72  | <i>MYC</i>     | 2.06              | 1.0                                   | 11               | Gain      |
| MO-72  | <i>APEX1</i>   | 2.05              | 1.0                                   | 15               | Gain      |
| MO-72  | <i>IL6</i>     | 1.97              | 1.0                                   | 17               | Gain      |
| MO-72  | <i>MCL1</i>    | 1.97              | 1.0                                   | 17               | Gain      |
| MO-72  | <i>AKT1</i>    | 1.90              | 0.9                                   | 17               | Gain      |
| MO-72  | <i>PNP</i>     | 1.80              | 0.8                                   | 18               | Gain      |
| MO-72  | <i>BRCA2</i>   | 0.44              | -1.2                                  | 132              | Loss      |
| MO-72  | <i>PTEN</i>    | 0.44              | -1.2                                  | 19               | Loss      |
| MO-72  | <i>RB1</i>     | 0.39              | -1.4                                  | 46               | Loss      |
| MO-79  | <i>BIRC3</i>   | 2.38              | 1.3                                   | 15               | Gain      |
| MO-79  | <i>BIRC2</i>   | 2.22              | 1.1                                   | 16               | Gain      |
| MO-80  | <i>MCL1</i>    | 2.16              | 1.1                                   | 17               | Gain      |
| MO-80  | <i>ERBB2</i>   | 1.81              | 0.9                                   | 26               | Gain      |



| Sample | Gene          | Copy Number Ratio | Copy Number Ratio (log <sub>2</sub> ) | Number of Probes | Gain/Loss |
|--------|---------------|-------------------|---------------------------------------|------------------|-----------|
| MO-80  | <i>MDM2</i>   | 1.81              | 0.9                                   | 14               | Gain      |
| MO-80  | <i>MYC</i>    | 1.78              | 0.8                                   | 11               | Gain      |
| MO-80  | <i>SMAD4</i>  | 0.47              | -1.1                                  | 9                | Loss      |
| MO-82  | <i>TERT</i>   | 1.81              | 0.9                                   | 14               | Gain      |
| MO-83  | <i>MDM2</i>   | 2.18              | 1.1                                   | 14               | Gain      |
| MO-83  | <i>KRAS</i>   | 2.17              | 1.1                                   | 12               | Gain      |
| MO-83  | <i>CDK4</i>   | 1.95              | 1.0                                   | 15               | Gain      |
| MO-86  | <i>FGFR1</i>  | 2.07              | 1.1                                   | 20               | Gain      |
| MO-86  | <i>MYC</i>    | 1.90              | 0.9                                   | 11               | Gain      |
| MO-86  | <i>CDKN2A</i> | 0.12              | -3.1                                  | 11               | Loss      |
| MO-88  | <i>MDM2</i>   | 2.07              | 1.0                                   | 14               | Gain      |
| MO-89  | <i>CDKN2A</i> | 0.48              | -1.1                                  | 11               | Loss      |
| MO-90  | <i>MDM2</i>   | 1.92              | 0.9                                   | 14               | Gain      |
| MO-90  | <i>CDKN2A</i> | 0.31              | -1.7                                  | 11               | Loss      |
| MO-91  | <i>FGFR1</i>  | 40.38             | 5.3                                   | 20               | Gain      |
| MO-91  | <i>EGFR</i>   | 22.49             | 4.5                                   | 33               | Gain      |
| MO-91  | <i>BCL2L1</i> | 1.86              | 0.9                                   | 18               | Gain      |
| MO-92  | <i>TERT</i>   | 2.40              | 1.3                                   | 14               | Gain      |
| MO-92  | <i>MYC</i>    | 2.03              | 1.0                                   | 11               | Gain      |
| MO-92  | <i>CDKN2A</i> | 0.22              | -2.2                                  | 11               | Loss      |
| MO-93  | <i>NKX2-1</i> | 3.02              | 1.6                                   | 7                | Gain      |
| MO-95  | <i>NKX2-1</i> | 1.94              | 1.0                                   | 7                | Gain      |
| MO-95  | <i>APEX1</i>  | 1.88              | 0.9                                   | 15               | Gain      |
| MO-96  | <i>BCL2L1</i> | 1.85              | 0.9                                   | 18               | Gain      |
| MO-97  | <i>DDR2</i>   | 2.05              | 1.0                                   | 8                | Gain      |
| MO-97  | <i>MDM4</i>   | 2.04              | 1.0                                   | 20               | Gain      |
| MO-97  | <i>CDK6</i>   | 2.00              | 1.0                                   | 15               | Gain      |
| MO-97  | <i>MCL1</i>   | 1.95              | 1.0                                   | 17               | Gain      |
| MO-97  | <i>MET</i>    | 1.87              | 0.9                                   | 25               | Gain      |
| MO-97  | <i>BCL9</i>   | 1.86              | 0.9                                   | 19               | Gain      |
| MO-97  | <i>CD274</i>  | 1.84              | 0.9                                   | 35               | Gain      |
| MO-97  | <i>CDKN2A</i> | 0.19              | -2.4                                  | 11               | Loss      |
| MO-98  | <i>CDK6</i>   | 1.92              | 0.9                                   | 15               | Gain      |
| MO-99  | <i>MYC</i>    | 1.96              | 1.0                                   | 11               | Gain      |
| MO-102 | <i>MYC</i>    | 2.42              | 1.3                                   | 11               | Gain      |
| MO-102 | <i>BCL2L1</i> | 2.32              | 1.2                                   | 18               | Gain      |
| MO-102 | <i>CCND1</i>  | 2.22              | 1.2                                   | 18               | Gain      |
| MO-102 | <i>MDM2</i>   | 1.88              | 0.9                                   | 14               | Gain      |
| MO-102 | <i>CDKN2A</i> | 0.35              | -1.5                                  | 11               | Loss      |
| MO-105 | <i>MDM4</i>   | 1.86              | 0.9                                   | 20               | Gain      |
| LU-1   | <i>NKX2-1</i> | 1.85              | 0.9                                   | 8                | Gain      |
| LU-8   | <i>CDK4</i>   | 7.22              | 2.9                                   | 15               | Gain      |
| LU-8   | <i>MDM2</i>   | 4.90              | 2.3                                   | 16               | Gain      |
| LU-8   | <i>EGFR</i>   | 2.10              | 1.1                                   | 31               | Gain      |
| LU-8   | <i>IL6</i>    | 2.01              | 1.0                                   | 17               | Gain      |
| LU-8   | <i>NKX2-1</i> | 1.87              | 0.9                                   | 8                | Gain      |
| LU-8   | <i>MCL1</i>   | 1.83              | 0.9                                   | 17               | Gain      |
| LU-9   | <i>CDKN2A</i> | 0.45              | -1.1                                  | 11               | Loss      |

| Sample | Gene            | Copy Number Ratio | Copy Number Ratio (log <sub>2</sub> ) | Number of Probes | Gain/Loss |
|--------|-----------------|-------------------|---------------------------------------|------------------|-----------|
| LU-13  | <i>TERT</i>     | 3.38              | 1.8                                   | 16               | Gain      |
| LU-13  | <i>ZNF217</i>   | 2.75              | 1.5                                   | 19               | Gain      |
| LU-13  | <i>MYC</i>      | 1.93              | 0.9                                   | 11               | Gain      |
| LU-15  | <i>MCL1</i>     | 1.89              | 0.9                                   | 17               | Gain      |
| LU-20  | <i>TERT</i>     | 1.76              | 0.8                                   | 16               | Gain      |
| LU-22  | <i>MET</i>      | 2.36              | 1.2                                   | 24               | Gain      |
| LU-22  | <i>CCNE1</i>    | 1.86              | 0.9                                   | 16               | Gain      |
| LU-23  | <i>TERT</i>     | 2.43              | 1.3                                   | 16               | Gain      |
| LU-23  | <i>CCNE1</i>    | 2.33              | 1.2                                   | 16               | Gain      |
| LU-23  | <i>NKX2-1</i>   | 2.14              | 1.1                                   | 8                | Gain      |
| LU-23  | <i>MYCL</i>     | 2.12              | 1.1                                   | 18               | Gain      |
| LU-26  | <i>EGFR</i>     | 3.33              | 1.7                                   | 31               | Gain      |
| LU-26  | <i>NKX2-1</i>   | 2.87              | 1.5                                   | 8                | Gain      |
| LU-26  | <i>MCL1</i>     | 2.69              | 1.4                                   | 17               | Gain      |
| LU-26  | <i>APEX1</i>    | 2.24              | 1.2                                   | 15               | Gain      |
| LU-26  | <i>MYC</i>      | 1.94              | 1.0                                   | 11               | Gain      |
| LU-26  | <i>WT1</i>      | 0.47              | -1.1                                  | 22               | Loss      |
| LU-27  | <i>SOX2</i>     | 1.86              | 0.9                                   | 11               | Gain      |
| LU-27  | <i>PIK3CA</i>   | 1.78              | 0.8                                   | 32               | Gain      |
| LU-29  | <i>TERT</i>     | 3.79              | 1.9                                   | 16               | Gain      |
| LU-29  | <i>GAS6</i>     | 2.90              | 1.5                                   | 22               | Gain      |
| LU-30  | <i>NKX2-1</i>   | 5.01              | 2.3                                   | 8                | Gain      |
| LU-30  | <i>TERT</i>     | 2.46              | 1.3                                   | 16               | Gain      |
| LU-30  | <i>BCL9</i>     | 1.85              | 0.9                                   | 19               | Gain      |
| LU-30  | <i>MCL1</i>     | 1.78              | 0.8                                   | 17               | Gain      |
| LU-31  | <i>ERBB2</i>    | 14.40             | 3.8                                   | 25               | Gain      |
| LU-31  | <i>NKX2-1</i>   | 3.61              | 1.9                                   | 8                | Gain      |
| LU-31  | <i>CCNE1</i>    | 2.34              | 1.2                                   | 16               | Gain      |
| LU-31  | <i>CCND1</i>    | 2.00              | 1.0                                   | 19               | Gain      |
| LU-31  | <i>TERT</i>     | 1.83              | 0.9                                   | 16               | Gain      |
| LU-32  | <i>NKX2-1</i>   | 3.77              | 1.9                                   | 8                | Gain      |
| LU-38  | <i>NKX2-1</i>   | 1.99              | 1.0                                   | 8                | Gain      |
| LU-39  | <i>MDM2</i>     | 5.17              | 2.4                                   | 16               | Gain      |
| LU-39  | <i>FGFR1</i>    | 4.51              | 2.2                                   | 19               | Gain      |
| LU-39  | <i>TERT</i>     | 3.02              | 1.6                                   | 16               | Gain      |
| LU-39  | <i>BAP1</i>     | 0.49              | -1.0                                  | 32               | Loss      |
| LU-40  | <i>AR</i>       | 1.86              | 0.9                                   | 17               | Gain      |
| LU-41  | <i>BCL9</i>     | 1.92              | 0.9                                   | 19               | Gain      |
| LU-42  | <i>SOX2</i>     | 3.88              | 2.0                                   | 11               | Gain      |
| LU-42  | <i>PDCD1LG2</i> | 1.92              | 0.9                                   | 17               | Gain      |
| LU-42  | <i>CDKN2A</i>   | 0.30              | -1.7                                  | 11               | Loss      |
| LU-45  | <i>CDKN2A</i>   | 0.49              | -1.0                                  | 11               | Loss      |
| LU-46  | <i>MYCL</i>     | 9.37              | 3.2                                   | 18               | Gain      |
| LU-46  | <i>CDK6</i>     | 1.82              | 0.9                                   | 15               | Gain      |
| LU-48  | <i>MYC</i>      | 1.89              | 0.9                                   | 11               | Gain      |
| LU-49  | <i>MCL1</i>     | 1.94              | 1.0                                   | 17               | Gain      |
| LU-49  | <i>BCL9</i>     | 1.80              | 0.8                                   | 19               | Gain      |
| LU-50  | <i>CCND1</i>    | 5.27              | 2.4                                   | 19               | Gain      |

| Sample | Gene            | Copy Number Ratio | Copy Number Ratio (log <sub>2</sub> ) | Number of Probes | Gain/Loss |
|--------|-----------------|-------------------|---------------------------------------|------------------|-----------|
| LU-56  | <i>MYC</i>      | 1.92              | 0.9                                   | 11               | Gain      |
| LU-58  | <i>SOX2</i>     | 2.38              | 1.2                                   | 11               | Gain      |
| LU-58  | <i>ATP11B</i>   | 1.92              | 0.9                                   | 17               | Gain      |
| LU-58  | <i>DCUN1D1</i>  | 1.91              | 0.9                                   | 16               | Gain      |
| LU-58  | <i>PIK3CA</i>   | 1.91              | 0.9                                   | 32               | Gain      |
| LU-65  | <i>CDKN2A</i>   | 0.46              | -1.1                                  | 11               | Loss      |
| LU-67  | <i>SOX2</i>     | 2.09              | 1.1                                   | 11               | Gain      |
| LU-67  | <i>NKX2-1</i>   | 1.76              | 0.8                                   | 8                | Gain      |
| LU-67  | <i>CDKN2A</i>   | 0.29              | -1.8                                  | 11               | Loss      |
| LU-68  | <i>MCL1</i>     | 2.08              | 1.1                                   | 17               | Gain      |
| LU-69  | <i>MCL1</i>     | 2.32              | 1.2                                   | 17               | Gain      |
| LU-69  | <i>NKX2-1</i>   | 1.78              | 0.8                                   | 8                | Gain      |
| LU-71  | <i>MDM2</i>     | 5.17              | 2.4                                   | 16               | Gain      |
| LU-71  | <i>NKX2-1</i>   | 2.80              | 1.5                                   | 8                | Gain      |
| LU-71  | <i>KRAS</i>     | 2.36              | 1.2                                   | 21               | Gain      |
| LU-71  | <i>MYC</i>      | 1.94              | 1.0                                   | 11               | Gain      |
| LU-71  | <i>BIRC2</i>    | 1.77              | 0.8                                   | 17               | Gain      |
| LU-74  | <i>MYC</i>      | 1.78              | 0.8                                   | 11               | Gain      |
| LU-75  | <i>MYC</i>      | 1.98              | 1.0                                   | 11               | Gain      |
| LU-77  | <i>SOX2</i>     | 1.94              | 1.0                                   | 11               | Gain      |
| LU-77  | <i>MYC</i>      | 1.91              | 0.9                                   | 11               | Gain      |
| LU-79  | <i>CDK4</i>     | 3.20              | 1.7                                   | 15               | Gain      |
| LU-79  | <i>KRAS</i>     | 2.45              | 1.3                                   | 21               | Gain      |
| LU-79  | <i>MDM2</i>     | 1.92              | 0.9                                   | 16               | Gain      |
| LU-85  | <i>CCND1</i>    | 15.64             | 4.0                                   | 19               | Gain      |
| LU-85  | <i>NKX2-1</i>   | 2.42              | 1.3                                   | 8                | Gain      |
| LU-85  | <i>MCL1</i>     | 2.32              | 1.2                                   | 17               | Gain      |
| LU-85  | <i>BCL9</i>     | 1.94              | 1.0                                   | 19               | Gain      |
| LU-85  | <i>MDM4</i>     | 1.83              | 0.9                                   | 20               | Gain      |
| LU-85  | <i>CDKN2A</i>   | 0.38              | -1.4                                  | 11               | Loss      |
| LU-90  | <i>CCNE1</i>    | 4.53              | 2.2                                   | 16               | Gain      |
| LU-95  | <i>CCND1</i>    | 6.28              | 2.7                                   | 19               | Gain      |
| LU-95  | <i>APEX1</i>    | 5.56              | 2.5                                   | 15               | Gain      |
| LU-95  | <i>PNP</i>      | 4.93              | 2.3                                   | 18               | Gain      |
| LU-95  | <i>BCL2L1</i>   | 4.03              | 2.0                                   | 18               | Gain      |
| LU-95  | <i>SOX2</i>     | 3.05              | 1.6                                   | 11               | Gain      |
| LU-95  | <i>ATP11B</i>   | 2.23              | 1.2                                   | 17               | Gain      |
| LU-95  | <i>DCUN1D1</i>  | 2.02              | 1.0                                   | 16               | Gain      |
| LU-95  | <i>PIK3CA</i>   | 2.01              | 1.0                                   | 32               | Gain      |
| LU-95  | <i>TERT</i>     | 1.78              | 0.8                                   | 16               | Gain      |
| LU-97  | <i>EGFR</i>     | 8.01              | 3.0                                   | 31               | Gain      |
| LU-97  | <i>PDCD1LG2</i> | 4.79              | 2.3                                   | 17               | Gain      |
| LU-97  | <i>CD274</i>    | 4.75              | 2.2                                   | 18               | Gain      |
| LU-97  | <i>PDGFRA</i>   | 3.63              | 1.9                                   | 21               | Gain      |
| LU-97  | <i>KIT</i>      | 3.13              | 1.6                                   | 27               | Gain      |
| LU-97  | <i>SOX2</i>     | 2.81              | 1.5                                   | 11               | Gain      |
| LU-97  | <i>DCUN1D1</i>  | 2.45              | 1.3                                   | 16               | Gain      |
| LU-97  | <i>ATP11B</i>   | 2.40              | 1.3                                   | 17               | Gain      |

| Sample | Gene           | Copy Number Ratio | Copy Number Ratio (log <sub>2</sub> ) | Number of Probes | Gain/Loss |
|--------|----------------|-------------------|---------------------------------------|------------------|-----------|
| LU-97  | <i>PIK3CA</i>  | 2.18              | 1.1                                   | 32               | Gain      |
| LU-97  | <i>GATA3</i>   | 0.43              | -1.2                                  | 13               | Loss      |
| LU-97  | <i>CDKN2A</i>  | 0.22              | -2.2                                  | 11               | Loss      |
| LU-104 | <i>SOX2</i>    | 11.11             | 3.5                                   | 11               | Gain      |
| LU-104 | <i>EGFR</i>    | 10.56             | 3.4                                   | 31               | Gain      |
| LU-104 | <i>DCUN1D1</i> | 8.84              | 3.1                                   | 16               | Gain      |
| LU-104 | <i>ATP11B</i>  | 7.79              | 3.0                                   | 17               | Gain      |
| LU-104 | <i>FGFR2</i>   | 3.03              | 1.6                                   | 21               | Gain      |
| LU-104 | <i>KIT</i>     | 2.84              | 1.5                                   | 27               | Gain      |
| LU-104 | <i>PDGFRA</i>  | 2.80              | 1.5                                   | 21               | Gain      |
| LU-104 | <i>CSNK2A1</i> | 1.86              | 0.9                                   | 19               | Gain      |
| LU-104 | <i>PIK3CA</i>  | 1.84              | 0.9                                   | 32               | Gain      |
| LU-106 | <i>SOX2</i>    | 2.62              | 1.4                                   | 11               | Gain      |
| LU-106 | <i>PDGFRA</i>  | 2.42              | 1.3                                   | 21               | Gain      |
| LU-106 | <i>KIT</i>     | 2.27              | 1.2                                   | 27               | Gain      |
| LU-106 | <i>ATP11B</i>  | 2.11              | 1.1                                   | 17               | Gain      |
| LU-106 | <i>DCUN1D1</i> | 2.03              | 1.0                                   | 16               | Gain      |
| LU-106 | <i>PIK3CA</i>  | 2.03              | 1.0                                   | 32               | Gain      |
| LU-106 | <i>EGFR</i>    | 1.78              | 0.8                                   | 31               | Gain      |
| LU-107 | <i>SOX2</i>    | 3.53              | 1.8                                   | 11               | Gain      |
| LU-107 | <i>DCUN1D1</i> | 2.09              | 1.1                                   | 16               | Gain      |
| LU-107 | <i>ATP11B</i>  | 2.02              | 1.0                                   | 17               | Gain      |
| LU-107 | <i>PIK3CA</i>  | 1.98              | 1.0                                   | 32               | Gain      |
| LU-112 | <i>TERT</i>    | 2.26              | 1.2                                   | 16               | Gain      |
| LU-114 | <i>SOX2</i>    | 3.40              | 1.8                                   | 11               | Gain      |
| LU-114 | <i>MDM2</i>    | 3.14              | 1.6                                   | 16               | Gain      |
| LU-114 | <i>DCUN1D1</i> | 2.65              | 1.4                                   | 16               | Gain      |
| LU-114 | <i>ATP11B</i>  | 2.62              | 1.4                                   | 17               | Gain      |
| LU-114 | <i>PIK3CA</i>  | 2.60              | 1.4                                   | 32               | Gain      |
| LU-114 | <i>FGFR1</i>   | 2.30              | 1.2                                   | 19               | Gain      |
| LU-116 | <i>KRAS</i>    | 1.81              | 0.9                                   | 21               | Gain      |
| LU-120 | <i>NKX2-1</i>  | 2.26              | 1.2                                   | 8                | Gain      |
| LU-123 | <i>EGFR</i>    | 1.93              | 0.9                                   | 31               | Gain      |
| LU-128 | <i>TERT</i>    | 2.31              | 1.2                                   | 16               | Gain      |
| LU-130 | <i>SOX2</i>    | 2.82              | 1.5                                   | 11               | Gain      |
| LU-130 | <i>DCUN1D1</i> | 2.34              | 1.2                                   | 16               | Gain      |
| LU-130 | <i>CCNE1</i>   | 2.17              | 1.1                                   | 16               | Gain      |
| LU-130 | <i>ATP11B</i>  | 2.10              | 1.1                                   | 17               | Gain      |
| LU-130 | <i>PIK3CA</i>  | 1.84              | 0.9                                   | 32               | Gain      |
| LU-132 | <i>KRAS</i>    | 1.90              | 0.9                                   | 21               | Gain      |
| LU-133 | <i>NKX2-1</i>  | 6.33              | 2.7                                   | 8                | Gain      |
| LU-133 | <i>TERT</i>    | 2.09              | 1.1                                   | 16               | Gain      |
| LU-133 | <i>PNP</i>     | 1.79              | 0.8                                   | 18               | Gain      |
| LU-133 | <i>CDKN2A</i>  | 0.37              | -1.4                                  | 11               | Loss      |
| LU-134 | <i>MCL1</i>    | 6.95              | 2.8                                   | 17               | Gain      |
| LU-134 | <i>BCL9</i>    | 2.67              | 1.4                                   | 19               | Gain      |
| LU-134 | <i>NKX2-1</i>  | 2.57              | 1.4                                   | 8                | Gain      |
| LU-134 | <i>SOX2</i>    | 2.28              | 1.2                                   | 11               | Gain      |

| Sample | Gene           | Copy Number Ratio | Copy Number Ratio (log <sub>2</sub> ) | Number of Probes | Gain/Loss |
|--------|----------------|-------------------|---------------------------------------|------------------|-----------|
| LU-134 | <i>MET</i>     | 1.76              | 0.8                                   | 24               | Gain      |
| LU-135 | <i>FGFR1</i>   | 2.42              | 1.3                                   | 19               | Gain      |
| LU-135 | <i>TERT</i>    | 1.78              | 0.8                                   | 16               | Gain      |
| LU-143 | <i>CD44</i>    | 5.36              | 2.4                                   | 19               | Gain      |
| LU-143 | <i>NKX2-1</i>  | 4.43              | 2.1                                   | 8                | Gain      |
| LU-143 | <i>TERT</i>    | 1.83              | 0.9                                   | 16               | Gain      |
| LU-144 | <i>CDKN2A</i>  | 0.43              | -1.2                                  | 11               | Loss      |
| LU-146 | <i>NKX2-1</i>  | 10.55             | 3.4                                   | 8                | Gain      |
| LU-146 | <i>CCND1</i>   | 4.49              | 2.2                                   | 19               | Gain      |
| LU-146 | <i>CDK4</i>    | 2.01              | 1.0                                   | 15               | Gain      |
| LU-147 | <i>CDK4</i>    | 4.05              | 2.0                                   | 15               | Gain      |
| LU-147 | <i>EGFR</i>    | 1.75              | 0.8                                   | 31               | Gain      |
| LU-148 | <i>NKX2-1</i>  | 2.04              | 1.0                                   | 8                | Gain      |
| LU-148 | <i>AR</i>      | 1.85              | 0.9                                   | 17               | Gain      |
| LU-148 | <i>BCL9</i>    | 1.77              | 0.8                                   | 19               | Gain      |
| LU-149 | <i>PDGFRA</i>  | 1.94              | 1.0                                   | 21               | Gain      |
| PR-13  | <i>MYC</i>     | 5.02              | 2.3                                   | 11               | Gain      |
| PR-13  | <i>MCL1</i>    | 4.81              | 2.3                                   | 17               | Gain      |
| PR-13  | <i>CCND1</i>   | 4.35              | 2.1                                   | 19               | Gain      |
| PR-13  | <i>BCL9</i>    | 3.08              | 1.6                                   | 19               | Gain      |
| PR-13  | <i>ERBB2</i>   | 1.92              | 0.9                                   | 25               | Gain      |
| PR-13  | <i>WT1</i>     | 0.46              | -1.1                                  | 22               | Loss      |
| PR-14  | <i>AR</i>      | 21.56             | 4.4                                   | 17               | Gain      |
| PR-14  | <i>MCL1</i>    | 1.83              | 0.9                                   | 17               | Gain      |
| PR-16  | <i>MYC</i>     | 2.08              | 1.1                                   | 11               | Gain      |
| PR-16  | <i>MCL1</i>    | 1.93              | 0.9                                   | 17               | Gain      |
| PR-16  | <i>SOX2</i>    | 1.88              | 0.9                                   | 11               | Gain      |
| PR-16  | <i>PIK3CA</i>  | 1.83              | 0.9                                   | 32               | Gain      |
| PR-2   | <i>AR</i>      | 7.00              | 2.8                                   | 17               | Gain      |
| PR-2   | <i>PTEN</i>    | 0.37              | -1.4                                  | 16               | Loss      |
| PR-8   | <i>MYC</i>     | 1.78              | 0.8                                   | 11               | Gain      |
| PR-22  | <i>CDK6</i>    | 1.83              | 0.9                                   | 15               | Gain      |
| PR-22  | <i>NKX2-1</i>  | 1.79              | 0.8                                   | 8                | Gain      |
| PR-25  | <i>AR</i>      | 12.43             | 3.6                                   | 17               | Gain      |
| PR-25  | <i>MYC</i>     | 2.23              | 1.2                                   | 11               | Gain      |
| PR-25  | <i>CSNK2A1</i> | 2.17              | 1.1                                   | 19               | Gain      |
| PR-26  | <i>RB1</i>     | 0.38              | -1.4                                  | 44               | Loss      |
| PR-26  | <i>PTEN</i>    | 0.27              | -1.9                                  | 16               | Loss      |
| PR-34  | <i>MSH2</i>    | 0.48              | -1.1                                  | 39               | Loss      |
| PR-40  | <i>MCL1</i>    | 1.89              | 0.9                                   | 17               | Gain      |
| PR-40  | <i>ABL1</i>    | 1.87              | 0.9                                   | 7                | Gain      |
| PR-42  | <i>CDKN2A</i>  | 0.49              | -1.0                                  | 11               | Loss      |
| PR-42  | <i>PTEN</i>    | 0.46              | -1.1                                  | 16               | Loss      |
| PR-49  | <i>AR</i>      | 4.99              | 2.3                                   | 17               | Gain      |
| PR-49  | <i>BCL9</i>    | 1.78              | 0.8                                   | 19               | Gain      |
| PR-51  | <i>MYC</i>     | 12.66             | 3.7                                   | 11               | Gain      |
| PR-51  | <i>MDM2</i>    | 2.04              | 1.0                                   | 16               | Gain      |
| PR-51  | <i>TERT</i>    | 1.84              | 0.9                                   | 16               | Gain      |

| Sample | Gene           | Copy Number Ratio | Copy Number Ratio (log <sub>2</sub> ) | Number of Probes | Gain/Loss |
|--------|----------------|-------------------|---------------------------------------|------------------|-----------|
| PR-55  | <i>MCL1</i>    | 2.86              | 1.5                                   | 17               | Gain      |
| PR-55  | <i>BCL9</i>    | 1.77              | 0.8                                   | 19               | Gain      |
| PR-58  | <i>PTEN</i>    | 0.35              | -1.5                                  | 16               | Loss      |
| PR-59  | <i>MCL1</i>    | 2.32              | 1.2                                   | 17               | Gain      |
| PR-60  | <i>MCL1</i>    | 1.99              | 1.0                                   | 17               | Gain      |
| PR-61  | <i>PTEN</i>    | 0.49              | -1.0                                  | 16               | Loss      |
| PR-62  | <i>PIK3CA</i>  | 1.83              | 0.9                                   | 32               | Gain      |
| PR-62  | <i>ATP11B</i>  | 1.81              | 0.9                                   | 17               | Gain      |
| PR-62  | <i>DCUN1D1</i> | 1.76              | 0.8                                   | 16               | Gain      |
| PR-62  | <i>RB1</i>     | 0.30              | -1.8                                  | 44               | Loss      |
| PR-63  | <i>MYC</i>     | 2.13              | 1.1                                   | 11               | Gain      |
| PR-63  | <i>FLT3</i>    | 1.86              | 0.9                                   | 22               | Gain      |
| PR-63  | <i>MCL1</i>    | 1.82              | 0.9                                   | 17               | Gain      |
| PR-69  | <i>CDK6</i>    | 2.22              | 1.2                                   | 15               | Gain      |
| PR-69  | <i>IL6</i>     | 1.82              | 0.9                                   | 17               | Gain      |
| PR-74  | <i>TP53</i>    | 0.37              | -1.4                                  | 20               | Loss      |
| PR-77  | <i>MCL1</i>    | 2.18              | 1.1                                   | 17               | Gain      |
| PR-77  | <i>MYC</i>     | 1.77              | 0.8                                   | 11               | Gain      |
| PR-82  | <i>MCL1</i>    | 1.77              | 0.8                                   | 17               | Gain      |
| PR-83  | <i>MYC</i>     | 2.23              | 1.2                                   | 11               | Gain      |
| PR-83  | <i>APEX1</i>   | 2.11              | 1.1                                   | 15               | Gain      |
| PR-83  | <i>ATP11B</i>  | 2.00              | 1.0                                   | 17               | Gain      |
| PR-83  | <i>PNP</i>     | 1.89              | 0.9                                   | 18               | Gain      |
| PR-83  | <i>PIK3CA</i>  | 1.86              | 0.9                                   | 32               | Gain      |
| PR-83  | <i>CSNK2A1</i> | 1.83              | 0.9                                   | 19               | Gain      |
| PR-83  | <i>PTEN</i>    | 0.37              | -1.4                                  | 16               | Loss      |
| PR-84  | <i>CSNK2A1</i> | 3.04              | 1.6                                   | 19               | Gain      |
| PR-84  | <i>RPS6KB1</i> | 2.17              | 1.1                                   | 18               | Gain      |
| PR-85  | <i>AKT1</i>    | 3.29              | 1.7                                   | 18               | Gain      |
| PR-86  | <i>MET</i>     | 1.85              | 0.9                                   | 24               | Gain      |
| PR-86  | <i>TP53</i>    | 0.28              | -1.9                                  | 20               | Loss      |
| PR-87  | <i>TSC2</i>    | 0.44              | -1.2                                  | 88               | Loss      |
| PR-88  | <i>AR</i>      | 5.50              | 2.5                                   | 17               | Gain      |
| PR-88  | <i>MCL1</i>    | 3.15              | 1.7                                   | 17               | Gain      |
| PR-88  | <i>MYC</i>     | 2.38              | 1.2                                   | 11               | Gain      |
| PR-88  | <i>BIRC2</i>   | 2.06              | 1.0                                   | 17               | Gain      |
| PR-88  | <i>CDK6</i>    | 1.85              | 0.9                                   | 15               | Gain      |
| PR-88  | <i>CDKN2A</i>  | 0.43              | -1.2                                  | 11               | Loss      |
| PR-90  | <i>MCL1</i>    | 1.84              | 0.9                                   | 17               | Gain      |
| PR-92  | <i>AKT1</i>    | 2.31              | 1.2                                   | 18               | Gain      |
| PR-92  | <i>DCUN1D1</i> | 2.01              | 1.0                                   | 16               | Gain      |
| PR-92  | <i>ATP11B</i>  | 1.95              | 1.0                                   | 17               | Gain      |
| PR-92  | <i>SOX2</i>    | 1.91              | 0.9                                   | 11               | Gain      |
| PR-92  | <i>VHL</i>     | 0.32              | -1.6                                  | 7                | Loss      |
| PR-92  | <i>PTEN</i>    | 0.12              | -3.1                                  | 16               | Loss      |
| PR-92  | <i>RB1</i>     | 0.10              | -3.3                                  | 44               | Loss      |
| PR-94  | <i>MYC</i>     | 2.32              | 1.2                                   | 11               | Gain      |
| PR-94  | <i>RB1</i>     | 0.31              | -1.7                                  | 44               | Loss      |

| Sample | Gene          | Copy Number Ratio | Copy Number Ratio (log <sub>2</sub> ) | Number of Probes | Gain/Loss |
|--------|---------------|-------------------|---------------------------------------|------------------|-----------|
| PR-96  | <i>EGFR</i>   | 1.94              | 1.0                                   | 31               | Gain      |
| PR-96  | <i>MYCN</i>   | 1.87              | 0.9                                   | 20               | Gain      |
| PR-96  | <i>ACVRL1</i> | 1.82              | 0.9                                   | 18               | Gain      |
| PR-96  | <i>CDKN2A</i> | 0.31              | -1.7                                  | 11               | Loss      |
| PR-100 | <i>AR</i>     | 9.50              | 3.2                                   | 17               | Gain      |
| PR-100 | <i>SOX2</i>   | 1.81              | 0.9                                   | 11               | Gain      |
| PR-100 | <i>PIK3R1</i> | 0.45              | -1.1                                  | 38               | Loss      |
| PR-101 | <i>MYC</i>    | 2.38              | 1.2                                   | 11               | Gain      |
| PR-101 | <i>MCL1</i>   | 2.13              | 1.1                                   | 17               | Gain      |
| PR-101 | <i>SOX2</i>   | 1.96              | 1.0                                   | 11               | Gain      |
| PR-102 | <i>MDM4</i>   | 4.40              | 2.1                                   | 20               | Gain      |
| PR-102 | <i>PTEN</i>   | 0.07              | -3.8                                  | 16               | Loss      |
| PR-102 | <i>RB1</i>    | 0.07              | -3.8                                  | 44               | Loss      |
| PR-105 | <i>RB1</i>    | 0.17              | -2.6                                  | 44               | Loss      |
| PR-106 | <i>MDM4</i>   | 4.63              | 2.2                                   | 20               | Gain      |
| PR-106 | <i>PTEN</i>   | 0.05              | -4.4                                  | 16               | Loss      |
| PR-106 | <i>RB1</i>    | 0.05              | -4.5                                  | 44               | Loss      |
| PR-107 | <i>MDM4</i>   | 1.82              | 0.9                                   | 20               | Gain      |
| PR-112 | <i>BCL2L1</i> | 1.77              | 0.8                                   | 18               | Gain      |
| PR-112 | <i>TP53</i>   | 0.34              | -1.5                                  | 20               | Loss      |
| PR-126 | <i>CDKN2A</i> | 0.46              | -1.1                                  | 11               | Loss      |
| PR-130 | <i>CDK6</i>   | 1.88              | 0.9                                   | 15               | Gain      |
| PR-130 | <i>EGFR</i>   | 1.87              | 0.9                                   | 31               | Gain      |
| PR-130 | <i>IL6</i>    | 1.84              | 0.9                                   | 17               | Gain      |
| PR-133 | <i>BCL2L1</i> | 32.76             | 5.0                                   | 18               | Gain      |
| PR-133 | <i>MYCL</i>   | 9.52              | 3.3                                   | 18               | Gain      |
| PR-133 | <i>FGFR1</i>  | 4.80              | 2.3                                   | 19               | Gain      |
| PR-134 | <i>AR</i>     | 87.15             | 6.4                                   | 17               | Gain      |
| PR-134 | <i>MYC</i>    | 14.43             | 3.9                                   | 11               | Gain      |
| PR-134 | <i>CCND1</i>  | 2.41              | 1.3                                   | 19               | Gain      |
| PR-134 | <i>TP53</i>   | 0.49              | -1.0                                  | 20               | Loss      |
| PR-141 | <i>MTOR</i>   | 1.86              | 0.9                                   | 4                | Gain      |
| PR-146 | <i>AR</i>     | 49.18             | 5.6                                   | 17               | Gain      |
| PR-146 | <i>CDK4</i>   | 21.55             | 4.4                                   | 15               | Gain      |
| PR-146 | <i>MYC</i>    | 21.07             | 4.4                                   | 11               | Gain      |
| PR-146 | <i>CCND1</i>  | 1.92              | 0.9                                   | 19               | Gain      |
| PR-146 | <i>FGFR1</i>  | 1.88              | 0.9                                   | 19               | Gain      |
| PR-146 | <i>PTEN</i>   | 0.31              | -1.7                                  | 16               | Loss      |
| PR-154 | <i>MCL1</i>   | 1.80              | 0.8                                   | 17               | Gain      |
| PR-159 | <i>RB1</i>    | 0.26              | -1.9                                  | 44               | Loss      |
| PR-160 | <i>AR</i>     | 29.26             | 4.9                                   | 17               | Gain      |
| PR-160 | <i>PIK3CA</i> | 18.23             | 4.2                                   | 32               | Gain      |
| PR-160 | <i>MYC</i>    | 2.06              | 1.0                                   | 11               | Gain      |
| PR-160 | <i>PTEN</i>   | 0.27              | -1.9                                  | 16               | Loss      |
| PR-166 | <i>MYC</i>    | 2.34              | 1.2                                   | 11               | Gain      |
| PR-167 | <i>CCND1</i>  | 1.83              | 0.9                                   | 19               | Gain      |
| PR-169 | <i>TP53</i>   | 0.50              | -1.0                                  | 20               | Loss      |
| PR-169 | <i>PTEN</i>   | 0.49              | -1.0                                  | 16               | Loss      |

| <b>Sample</b> | <b>Gene</b>    | <b>Copy Number Ratio</b> | <b>Copy Number Ratio (<math>\log_2</math>)</b> | <b>Number of Probes</b> | <b>Gain/Loss</b> |
|---------------|----------------|--------------------------|------------------------------------------------|-------------------------|------------------|
| PR-169        | <i>CDKN2A</i>  | 0.46                     | -1.1                                           | 11                      | Loss             |
| PR-170        | <i>SOX2</i>    | 3.44                     | 1.8                                            | 11                      | Gain             |
| PR-170        | <i>ATP11B</i>  | 2.93                     | 1.6                                            | 17                      | Gain             |
| PR-170        | <i>DCUN1D1</i> | 2.80                     | 1.5                                            | 16                      | Gain             |
| PR-170        | <i>PIK3CA</i>  | 2.06                     | 1.0                                            | 32                      | Gain             |
| PR-170        | <i>AR</i>      | 1.85                     | 0.9                                            | 17                      | Gain             |
| PR-170        | <i>PTEN</i>    | 0.45                     | -1.2                                           | 16                      | Loss             |

All high-level ( $\log_2$  copy number ratio  $> 0.81$  or  $< -1.0$ ), pre-defined actionable CNAs identified by OCP in MO/LU/PR cohort samples are shown. For each CNA, the sample, gene, raw copy number ratio, and  $\log_2$  copy number ratio are provided. The number of amplicons targeting the gene (from the OCP version used for that sample) and whether the CNA represents a gain or loss are indicated.



**Table S11: OCP identified prioritized gene fusions in MO/LU/PR samples**

| Sample | Fusion             | Raw Isoform Mapped Read Count | Normalized Isoform Mapped Read Count | Total Mapped Reads | Housekeeping Mapped Reads |
|--------|--------------------|-------------------------------|--------------------------------------|--------------------|---------------------------|
| MO-17  | ERC1-BRAF.E12B10   | 525                           | 6.81                                 | 492,417            | 468,918                   |
| MO-17  | ERC1-BRAF.E12B9    | 11,016                        | 11.20                                | 492,417            | 468,918                   |
| MO-17  | ERC1-BRAF.E17B8    | 280                           | 5.90                                 | 492,417            | 468,918                   |
| MO-35  | TPR-NTRK1.T21N10   | 127,769                       | 15.06                                | 525,219            | 373,342                   |
| MO-100 | EML4-ALK.E6aA20    | 13,638                        | 13.41                                | 870,610            | 125,471                   |
| MO-106 | EML4-ALK.E20A20    | 538                           | 13.50                                | 9,600              | 4,648                     |
| LU-1   | EML4-ALK.E13A20    | 20,079                        | 15.20                                | 1,250,772          | 941,296                   |
| LU-30  | EML4-ALK.E6aA20    | 8,106                         | 11.65                                | 384,752            | 251,885                   |
| LU-30  | EML4-ALK.E6bA20    | 1,628                         | 9.34                                 | 384,752            | 251,885                   |
| LU-61  | EZR-ROS1.E10R34    | 239                           | 12.95                                | 10,039             | 3,017                     |
| PR-1   | TMPRSS2-ERG.T1E4   | 79,331                        | 15.81                                | 504,385            | 137,855                   |
| PR-1   | TMPRSS2-ERG.T1E5   | 703                           | 8.99                                 | 504,385            | 137,855                   |
| PR-1   | TMPRSS2-ERG.T1E7   | 694                           | 8.98                                 | 504,385            | 137,855                   |
| PR-1   | TMPRSS2-ERG.T2E4   | 280,250                       | 17.63                                | 504,385            | 137,855                   |
| PR-1   | TMPRSS2-ERG.T2E5   | 1,433                         | 10.02                                | 504,385            | 137,855                   |
| PR-2   | TMPRSS2-ERG.T1E4   | 31,307                        | 16.37                                | 157,779            | 36,897                    |
| PR-2   | TMPRSS2-ERG.T1E5   | 462                           | 10.29                                | 157,779            | 36,897                    |
| PR-2   | TMPRSS2-ERG.T1E7   | 167                           | 8.82                                 | 157,779            | 36,897                    |
| PR-2   | TMPRSS2-ERG.T2E4   | 86,532                        | 17.84                                | 157,779            | 36,897                    |
| PR-2   | TMPRSS2-ERG.T2E5   | 186                           | 8.98                                 | 157,779            | 36,897                    |
| PR-7-3 | TMPRSS2-ETV1a.T1E4 | 2,052                         | 16.19                                | 5,834              | 2,736                     |
| PR-17  | TMPRSS2-ERG.T1E4   | 11,847                        | 12.84                                | 446,123            | 161,048                   |
| PR-17  | TMPRSS2-ERG.T1E5   | 94                            | 5.87                                 | 446,123            | 161,048                   |
| PR-17  | TMPRSS2-ERG.T1E7   | 208                           | 7.01                                 | 446,123            | 161,048                   |
| PR-17  | TMPRSS2-ERG.T2E4   | 101,971                       | 15.95                                | 446,123            | 161,048                   |
| PR-17  | TMPRSS2-ERG.T2E5   | 2,016                         | 10.29                                | 446,123            | 161,048                   |
| PR-17  | TMPRSS2-ERG.T3E2   | 867                           | 9.07                                 | 446,123            | 161,048                   |
| PR-17  | TMPRSS2-ERG.T3E4   | 151,028                       | 16.52                                | 446,123            | 161,048                   |
| PR-17  | TMPRSS2-ERG.T3E5   | 2,002                         | 10.28                                | 446,123            | 161,048                   |
| PR-17  | TMPRSS2-ERG.T3E6   | 160                           | 6.63                                 | 446,123            | 161,048                   |
| PR-19  | TMPRSS2-ERG.T1E4   | 10,789                        | 12.49                                | 206,018            | 187,650                   |
| PR-19  | TMPRSS2-ERG.T1E5   | 208                           | 6.79                                 | 206,018            | 187,650                   |
| PR-19  | TMPRSS2-ERG.T1E7   | 63                            | 5.07                                 | 206,018            | 187,650                   |
| PR-20  | TMPRSS2-ERG.T1E4   | 8,072                         | 11.35                                | 351,645            | 308,654                   |
| PR-20  | TMPRSS2-ERG.T1E5   | 77                            | 4.64                                 | 351,645            | 308,654                   |
| PR-20  | TMPRSS2-ERG.T1E7   | 262                           | 6.41                                 | 351,645            | 308,654                   |
| PR-21  | TMPRSS2-ERG.T1E4   | 73,874                        | 14.46                                | 489,697            | 327,862                   |
| PR-21  | TMPRSS2-ERG.T1E5   | 375                           | 6.84                                 | 489,697            | 327,862                   |
| PR-23  | SLC45A3-ERG.S1E2   | 8,437                         | 13.09                                | 667,457            | 96,461                    |
| PR-23  | SLC45A3-ERG.S1E4   | 559,324                       | 19.15                                | 667,457            | 96,461                    |
| PR-23  | SLC45A3-ERG.S1E5   | 3,219                         | 11.70                                | 667,457            | 96,461                    |
| PR-26  | TMPRSS2-ERG.T1E4   | 620                           | 7.92                                 | 746,614            | 255,948                   |
| PR-30  | TMPRSS2-ERG.T1E5   | 3,121                         | 15.16                                | 14,455             | 8,549                     |
| PR-49  | TMPRSS2-ERG.T1E4   | 44,653                        | 16.85                                | 84,387             | 37,703                    |
| PR-49  | TMPRSS2-ERG.T1E5   | 111                           | 8.20                                 | 84,387             | 37,703                    |
| PR-49  | TMPRSS2-ERG.T1E7   | 490                           | 10.34                                | 84,387             | 37,703                    |
| PR-53  | TMPRSS2-ERG.T1E4   | 152                           | 9.42                                 | 33,039             | 22,143                    |
| PR-53  | TMPRSS2-ERG.T2E4   | 9,581                         | 15.40                                | 33,039             | 22,143                    |
| PR-57  | TMPRSS2-ERG.T1E4   | 55                            | 6.85                                 | 611,952            | 47,661                    |
| PR-57  | TMPRSS2-ERG.T1E5   | 54,912                        | 16.81                                | 611,952            | 47,661                    |
| PR-57  | TMPRSS2-ERG.T2E4   | 133                           | 8.12                                 | 611,952            | 47,661                    |
| PR-57  | TMPRSS2-ERG.T2E5   | 505,569                       | 20.02                                | 611,952            | 47,661                    |
| PR-57  | TMPRSS2-ERG.T2E6   | 384                           | 9.65                                 | 611,952            | 47,661                    |
| PR-58  | TMPRSS2-ERG.T1E4   | 3,404                         | 13.41                                | 40,163             | 31,369                    |
| PR-58  | TMPRSS2-ERG.T2E4   | 78                            | 7.96                                 | 40,163             | 31,369                    |
| PR-60  | TMPRSS2-ERG.T1E4   | 32,571                        | 16.80                                | 259,092            | 28,591                    |
| PR-60  | TMPRSS2-ERG.T1E5   | 116                           | 8.66                                 | 259,092            | 28,591                    |
| PR-60  | TMPRSS2-ERG.T1E7   | 361                           | 10.30                                | 259,092            | 28,591                    |
| PR-60  | TMPRSS2-ERG.T2E4   | 393                           | 10.42                                | 259,092            | 28,591                    |
| PR-60  | TMPRSS2-ERG.T4E4   | 14,745                        | 15.65                                | 259,092            | 28,591                    |
| PR-60  | TMPRSS2-ERG.T4E5   | 498                           | 10.77                                | 259,092            | 28,591                    |

| Sample | Fusion           | Raw Isoform       | Normalized Isoform | Total Mapped Reads | Housekeeping Mapped Reads |
|--------|------------------|-------------------|--------------------|--------------------|---------------------------|
|        |                  | Mapped Read Count | Mapped Read Count  |                    |                           |
| PR-60  | TMPRSS2-ERG.T5E2 | 2,779             | 13.25              | 259,092            | 28,591                    |
| PR-60  | TMPRSS2-ERG.T5E4 | 176,451           | 19.24              | 259,092            | 28,591                    |
| PR-60  | TMPRSS2-ERG.T5E5 | 1,426             | 12.28              | 259,092            | 28,591                    |
| PR-64  | TMPRSS2-ERG.T1E4 | 1,446             | 12.44              | 135,102            | 26,023                    |
| PR-64  | TMPRSS2-ERG.T2E4 | 61,926            | 17.86              | 135,102            | 26,023                    |
| PR-64  | TMPRSS2-ERG.T2E5 | 146               | 9.13               | 135,102            | 26,023                    |
| PR-64  | TMPRSS2-ERG.T3E4 | 42,357            | 17.31              | 135,102            | 26,023                    |
| PR-66  | TMPRSS2-ERG.T1E4 | 118,002           | 15.90              | 312,398            | 193,504                   |
| PR-66  | TMPRSS2-ERG.T1E5 | 888               | 8.84               | 312,398            | 193,504                   |
| PR-69  | TMPRSS2-ERG.T1E4 | 863               | 14.09              | 12,558             | 4,964                     |
| PR-69  | TMPRSS2-ERG.T2E4 | 4,965             | 16.61              | 12,558             | 4,964                     |
| PR-69  | TMPRSS2-ERG.T2E5 | 41                | 9.69               | 12,558             | 4,964                     |
| PR-72  | TMPRSS2-ERG.T1E4 | 174,087           | 16.41              | 401,946            | 199,805                   |
| PR-72  | TMPRSS2-ERG.T1E5 | 1,911             | 9.90               | 401,946            | 199,805                   |
| PR-72  | TMPRSS2-ERG.T1E7 | 164               | 6.36               | 401,946            | 199,805                   |
| PR-72  | TMPRSS2-ERG.T2E4 | 43                | 4.43               | 401,946            | 199,805                   |
| PR-74  | TMPRSS2-ERG.T1E4 | 260,355           | 15.33              | 896,491            | 631,502                   |
| PR-74  | TMPRSS2-ERG.T1E5 | 4,535             | 9.49               | 896,491            | 631,502                   |
| PR-74  | TMPRSS2-ERG.T1E6 | 94                | 3.90               | 896,491            | 631,502                   |
| PR-77  | TMPRSS2-ERG.T2E2 | 66                | 9.91               | 7,464              | 6,855                     |
| PR-86  | TMPRSS2-ERG.T1E4 | 1,135             | 15.92              | 5,228              | 1,832                     |
| PR-86  | TMPRSS2-ERG.T1E5 | 33                | 10.81              | 5,228              | 1,832                     |
| PR-87  | TMPRSS2-ERG.T1E4 | 3,376             | 16.22              | 40,111             | 4,424                     |
| PR-87  | TMPRSS2-ERG.T1E7 | 32                | 9.50               | 40,111             | 4,424                     |
| PR-87  | TMPRSS2-ERG.T2E4 | 31,905            | 19.46              | 40,111             | 4,424                     |
| PR-87  | TMPRSS2-ERG.T2E5 | 369               | 13.03              | 40,111             | 4,424                     |
| PR-89  | TMPRSS2-ERG.T1E2 | 2,308             | 14.65              | 12,186             | 8,987                     |
| PR-92  | TMPRSS2-ERG.T1E2 | 4,307             | 14.03              | 78,746             | 25,693                    |
| PR-92  | TMPRSS2-ERG.T2E2 | 48,745            | 17.53              | 78,746             | 25,693                    |
| PR-94  | TMPRSS2-ERG.T1E4 | 940               | 12.32              | 95,229             | 18,383                    |
| PR-99  | TMPRSS2-ERG.T1E2 | 3,979             | 14.97              | 62,429             | 12,420                    |
| PR-99  | TMPRSS2-ERG.T1E3 | 41                | 8.37               | 62,429             | 12,420                    |
| PR-99  | TMPRSS2-ERG.T1E4 | 3,775             | 14.89              | 62,429             | 12,420                    |
| PR-99  | TMPRSS2-ERG.T1E7 | 45                | 8.50               | 62,429             | 12,420                    |
| PR-99  | TMPRSS2-ERG.T2E2 | 19,095            | 17.23              | 62,429             | 12,420                    |
| PR-99  | TMPRSS2-ERG.T2E4 | 19,420            | 17.25              | 62,429             | 12,420                    |
| PR-99  | TMPRSS2-ERG.T2E5 | 115               | 9.85               | 62,429             | 12,420                    |
| PR-100 | TMPRSS2-ERG.T4E4 | 741               | 10.75              | 67,178             | 42,956                    |
| PR-100 | TMPRSS2-ERG.T4E5 | 58                | 7.08               | 67,178             | 42,956                    |
| PR-100 | TMPRSS2-ERG.T5E4 | 1,474             | 11.74              | 67,178             | 42,956                    |
| PR-100 | TMPRSS2-ERG.T5E5 | 61                | 7.15               | 67,178             | 42,956                    |
| PR-101 | SLC45A3-ERG.S1E4 | 5,629             | 16.03              | 16,760             | 8,433                     |
| PR-102 | TMPRSS2-ERG.T1E4 | 18,308            | 12.05              | 613,899            | 432,964                   |
| PR-102 | TMPRSS2-ERG.T1E5 | 825               | 7.57               | 613,899            | 432,964                   |
| PR-102 | TMPRSS2-ERG.T2E4 | 74,581            | 14.07              | 613,899            | 432,964                   |
| PR-102 | TMPRSS2-ERG.T2E5 | 2,579             | 9.22               | 613,899            | 432,964                   |
| PR-106 | TMPRSS2-ERG.T1E4 | 13,368            | 10.82              | 1,104,350          | 737,991                   |
| PR-106 | TMPRSS2-ERG.T1E5 | 380               | 5.69               | 1,104,350          | 737,991                   |
| PR-106 | TMPRSS2-ERG.T1E7 | 67                | 3.18               | 1,104,350          | 737,991                   |
| PR-106 | TMPRSS2-ERG.T2E4 | 30,760            | 12.03              | 1,104,350          | 737,991                   |
| PR-110 | TMPRSS2-ERG.T1E2 | 11,865            | 15.49              | 368,597            | 25,724                    |
| PR-110 | TMPRSS2-ERG.T1E4 | 159               | 9.27               | 368,597            | 25,724                    |
| PR-110 | TMPRSS2-ERG.T2E2 | 320,717           | 20.25              | 368,597            | 25,724                    |
| PR-110 | TMPRSS2-ERG.T2E4 | 140               | 9.09               | 368,597            | 25,724                    |
| PR-111 | TMPRSS2-ERG.T1E4 | 63,309            | 14.88              | 297,656            | 210,321                   |
| PR-111 | TMPRSS2-ERG.T1E5 | 770               | 8.52               | 297,656            | 210,321                   |
| PR-111 | TMPRSS2-ERG.T1E7 | 395               | 7.55               | 297,656            | 210,321                   |
| PR-112 | TMPRSS2-ERG.T1E2 | 42                | 2.88               | 584,751            | 568,810                   |
| PR-114 | TMPRSS2-ERG.T1E4 | 124               | 8.98               | 209,999            | 24,491                    |
| PR-114 | TMPRSS2-ERG.T4E4 | 14,522            | 15.86              | 209,999            | 24,491                    |
| PR-114 | TMPRSS2-ERG.T4E5 | 162               | 9.37               | 209,999            | 24,491                    |
| PR-114 | TMPRSS2-ERG.T5E2 | 2,045             | 13.03              | 209,999            | 24,491                    |
| PR-114 | TMPRSS2-ERG.T5E4 | 155,413           | 19.28              | 209,999            | 24,491                    |
| PR-114 | TMPRSS2-ERG.T5E5 | 1,314             | 12.39              | 209,999            | 24,491                    |

| Sample | Fusion            | Raw Isoform       | Normalized Isoform | Total Mapped Reads | Housekeeping Mapped Reads |
|--------|-------------------|-------------------|--------------------|--------------------|---------------------------|
|        |                   | Mapped Read Count | Mapped Read Count  |                    |                           |
| PR-115 | TMPRSS2-ERG.T5E4  | 35                | 8.20               | 12,097             | 11,904                    |
| PR-116 | TMPRSS2-ERG.T1E4  | 96,754            | 15.15              | 813,287            | 266,609                   |
| PR-116 | TMPRSS2-ERG.T1E5  | 1,528             | 9.16               | 813,287            | 266,609                   |
| PR-116 | TMPRSS2-ERG.T1E7  | 873               | 8.36               | 813,287            | 266,609                   |
| PR-116 | TMPRSS2-ERG.T2E4  | 420,858           | 17.27              | 813,287            | 266,609                   |
| PR-116 | TMPRSS2-ERG.T2E5  | 1,849             | 9.44               | 813,287            | 266,609                   |
| PR-118 | TMPRSS2-ERG.T1E4  | 29,715            | 14.68              | 396,022            | 113,400                   |
| PR-118 | TMPRSS2-ERG.T1E5  | 87                | 6.26               | 396,022            | 113,400                   |
| PR-118 | TMPRSS2-ERG.T1E7  | 280               | 7.95               | 396,022            | 113,400                   |
| PR-118 | TMPRSS2-ERG.T2E4  | 227,969           | 17.62              | 396,022            | 113,400                   |
| PR-118 | TMPRSS2-ERG.T2E5  | 1,907             | 10.72              | 396,022            | 113,400                   |
| PR-120 | TMPRSS2-ERG.T1E2  | 97                | 4.92               | 455,986            | 319,662                   |
| PR-120 | TMPRSS2-ERG.T1E4  | 34,198            | 13.39              | 455,986            | 319,662                   |
| PR-120 | TMPRSS2-ERG.T1E5  | 39                | 3.61               | 455,986            | 319,662                   |
| PR-120 | TMPRSS2-ERG.T1E7  | 158               | 5.63               | 455,986            | 319,662                   |
| PR-120 | TMPRSS2-ERG.T2E4  | 84,161            | 14.68              | 455,986            | 319,662                   |
| PR-120 | TMPRSS2-ERG.T2E5  | 269               | 6.39               | 455,986            | 319,662                   |
| PR-121 | TMPRSS2-ERG.T2E4  | 3,497             | 10.54              | 370,278            | 235,235                   |
| PR-121 | TMPRSS2-ERG.T2E5  | 508               | 7.75               | 370,278            | 235,235                   |
| PR-126 | TMPRSS2-ERG.T1E4  | 5,034             | 12.99              | 238,180            | 61,957                    |
| PR-126 | TMPRSS2-ERG.T2E4  | 129,094           | 17.67              | 238,180            | 61,957                    |
| PR-126 | TMPRSS2-ERG.T2E5  | 494               | 9.64               | 238,180            | 61,957                    |
| PR-134 | TMPRSS2-ERG.T1E2  | 52,605            | 15.07              | 594,098            | 152,506                   |
| PR-134 | TMPRSS2-ERG.T1E3  | 277               | 7.50               | 594,098            | 152,506                   |
| PR-134 | TMPRSS2-ERG.T1E4  | 201               | 7.04               | 594,098            | 152,506                   |
| PR-134 | TMPRSS2-ERG.T2E2  | 386,080           | 17.95              | 594,098            | 152,506                   |
| PR-134 | TMPRSS2-ERG.T2E3  | 326               | 7.74               | 594,098            | 152,506                   |
| PR-134 | TMPRSS2-ERG.T2E4  | 891               | 9.19               | 594,098            | 152,506                   |
| PR-134 | TMPRSS2-ERG.T5E4  | 130               | 6.41               | 594,098            | 152,506                   |
| PR-135 | TMPRSS2-ERG.T1E4  | 6,743             | 13.09              | 226,099            | 77,581                    |
| PR-135 | TMPRSS2-ERG.T1E5  | 72                | 6.54               | 226,099            | 77,581                    |
| PR-135 | TMPRSS2-ERG.T1E7  | 39                | 5.65               | 226,099            | 77,581                    |
| PR-135 | TMPRSS2-ERG.T2E4  | 131,494           | 17.37              | 226,099            | 77,581                    |
| PR-135 | TMPRSS2-ERG.T2E5  | 912               | 10.20              | 226,099            | 77,581                    |
| PR-136 | TMPRSS2-ERG.T1E2  | 110               | 7.14               | 394,526            | 78,093                    |
| PR-136 | TMPRSS2-ERG.T1E4  | 59,425            | 16.22              | 394,526            | 78,093                    |
| PR-136 | TMPRSS2-ERG.T1E5  | 443               | 9.15               | 394,526            | 78,093                    |
| PR-136 | TMPRSS2-ERG.T1E7  | 252               | 8.33               | 394,526            | 78,093                    |
| PR-136 | TMPRSS2-ERG.T2E4  | 244,519           | 18.26              | 394,526            | 78,093                    |
| PR-136 | TMPRSS2-ERG.T2E5  | 1,084             | 10.44              | 394,526            | 78,093                    |
| PR-137 | TMPRSS2-ERG.T1E4  | 75,976            | 14.92              | 330,314            | 245,796                   |
| PR-137 | TMPRSS2-ERG.T1E5  | 1,733             | 9.46               | 330,314            | 245,796                   |
| PR-137 | TMPRSS2-ERG.T1E7  | 1,129             | 8.84               | 330,314            | 245,796                   |
| PR-140 | TMPRSS2-ERG.T1E4  | 94                | 6.02               | 154,229            | 145,036                   |
| PR-141 | TMPRSS2-ERG.T2E4  | 147               | 10.59              | 10,755             | 9,550                     |
| PR-142 | TMPRSS2-ERG.T1E4  | 164               | 5.92               | 270,933            | 270,769                   |
| PR-146 | TMPRSS2-ERG.T1E2  | 329               | 7.30               | 254,627            | 208,772                   |
| PR-146 | TMPRSS2-ERG.T1E4  | 28,719            | 13.75              | 254,627            | 208,772                   |
| PR-146 | TMPRSS2-ERG.T1E5  | 515               | 7.95               | 254,627            | 208,772                   |
| PR-146 | TMPRSS2-ERG.T1E7  | 199               | 6.57               | 254,627            | 208,772                   |
| PR-146 | TMPRSS2-ERG.T2E4  | 63                | 4.92               | 254,627            | 208,772                   |
| PR-148 | TMPRSS2-ERG.T1E4  | 274               | 14.11              | 1,862              | 1,548                     |
| PR-162 | TMPRSS2-ERG.T1E4  | 186               | 12.34              | 16,479             | 3,584                     |
| PR-162 | TMPRSS2-ERG.T2E4  | 12,374            | 18.40              | 16,479             | 3,584                     |
| PR-162 | TMPRSS2-ERG.T2E5  | 110               | 11.58              | 16,479             | 3,584                     |
| PR-163 | TMPRSS2-ERG.T2E4  | 184               | 7.20               | 149,181            | 124,744                   |
| PR-166 | TMPRSS2-ERG.T1E4  | 559               | 15.71              | 1,687              | 1,046                     |
| PR-169 | TMPRSS2-ERG.T1E4  | 163               | 10.87              | 8,897              | 8,727                     |
| PR-170 | TMPRSS2-ERG.T1E4  | 13,787            | 14.99              | 205,024            | 42,464                    |
| PR-170 | TMPRSS2-ERG.T1E5  | 107               | 7.98               | 205,024            | 42,464                    |
| PR-170 | TMPRSS2-ERG.T1E7  | 123               | 8.18               | 205,024            | 42,464                    |
| PR-170 | TMPRSS2-ERG.T2E4  | 73,562            | 17.40              | 205,024            | 42,464                    |
| PR-170 | TMPRSS2-ERG.T2E5  | 459               | 10.08              | 205,024            | 42,464                    |
| PR-172 | SLC45A3-ETV1.S1E6 | 7,996             | 13.01              | 307,822            | 97,012                    |

| <b>Sample</b> | <b>Fusion</b>      | <b>Raw Isoform<br/>Mapped Read<br/>Count</b> | <b>Normalized Isoform<br/>Mapped Read<br/>Count</b> | <b>Total Mapped<br/>Reads</b> | <b>Housekeeping<br/>Mapped Reads</b> |
|---------------|--------------------|----------------------------------------------|-----------------------------------------------------|-------------------------------|--------------------------------------|
| PR-172        | SLC45A3-ETV1a.S1E4 | 198,858                                      | 17.65                                               | 307,822                       | 97,012                               |
| PR-172        | SLC45A3-ETV1b.S1E4 | 249                                          | 8.00                                                | 307,822                       | 97,012                               |
| PR-179        | TMPRSS2-ERG.T1E4   | 58,361                                       | 16.08                                               | 659,899                       | 84,297                               |
| PR-179        | TMPRSS2-ERG.T1E5   | 364                                          | 8.75                                                | 659,899                       | 84,297                               |
| PR-179        | TMPRSS2-ERG.T1E7   | 472                                          | 9.13                                                | 659,899                       | 84,297                               |
| PR-179        | TMPRSS2-ERG.T2E4   | 512,169                                      | 19.21                                               | 659,899                       | 84,297                               |
| PR-179        | TMPRSS2-ERG.T2E5   | 1,273                                        | 10.56                                               | 659,899                       | 84,297                               |

All OCP identified actionable gene fusions are shown. For each fusion, the sample, fusion isoform (5' gene-3' gene.exon junction of 5'/3' genes; e.g. ERC1-BRAF.E12B10 = ERC1 exon 12 fused to BRAF exon 10 in MO-17), raw number of mapped isoform specific reads and corresponding normalized read counts are given (see Methods). The total number of mapped reads and total housekeeping/positive control gene reads per sample are given.

**Table S12: Concordance of clinical molecular testing and OCP results**

| Sample | Clinical testing |         |             |      | OCP testing |               |                  |                   |
|--------|------------------|---------|-------------|------|-------------|---------------|------------------|-------------------|
|        | KRAS             | BRAF    | EGFR        | ALK  | Concordant  | Gene / Fusion | Variant Fraction | Amino Acid Change |
| MO-1   | Neg.             | V600E   |             |      | Yes         | BRAF          | 0.31             | V600E             |
| MO-2   |                  |         | Neg.        | Neg. | Yes         |               |                  |                   |
| MO-3   |                  | Neg.    |             |      | Yes         |               |                  |                   |
| MO-4   |                  | Neg.    |             |      | Yes         |               |                  |                   |
| MO-5   |                  | Neg.    |             |      | Yes         |               |                  |                   |
| MO-6   | G12V             |         |             |      | Yes         | KRAS          | 0.30             | G12V              |
| MO-7   |                  | V600E   |             |      | Yes         | BRAF          | 0.13             | V600E             |
| MO-8   |                  | V600E   |             |      | Yes         | BRAF          | 0.61             | V600E             |
| MO-9   |                  | Neg.    |             |      | Yes         |               |                  |                   |
| MO-10  |                  | Neg.    |             |      | Yes         |               |                  |                   |
| MO-11  |                  | Neg.    |             |      | Yes         |               |                  |                   |
| MO-12  | Neg.             |         |             |      | Yes         |               |                  |                   |
| MO-13  |                  | V600E   |             |      | Yes         | BRAF          | 0.23             | V600E             |
| MO-14  |                  | Neg.    |             |      | Yes         |               |                  |                   |
| MO-15  |                  | Neg.    |             |      | Yes         |               |                  |                   |
| MO-16  | Neg.             |         |             |      | Yes         |               |                  |                   |
| MO-17  |                  | Neg.    |             |      | Yes         |               |                  |                   |
| MO-18  |                  | V600K   |             |      | Yes         | BRAF          | 0.81             | V600K             |
| MO-19  |                  | V600E   |             |      | Yes         | BRAF          | 0.53             | V600E             |
| MO-20  |                  |         |             | Neg. | Yes         |               |                  |                   |
| MO-21  | G12V             |         |             |      | Yes         | KRAS          | 0.13             | G12V              |
| MO-22  | Neg.             |         |             |      | Yes         |               |                  |                   |
| MO-23  | G13D             | Neg.    |             |      | Yes         | KRAS          | 0.23             | G13D              |
| MO-24  | G13D             |         |             |      | Yes         | KRAS          | 0.33             | G13D              |
| MO-25  |                  |         | Neg.        |      | Yes         |               |                  |                   |
| MO-26  |                  | Neg.    |             |      | Yes         |               |                  |                   |
| MO-27  |                  | V600E   |             |      | Yes         | BRAF          | 0.57             | V600E             |
| MO-28  |                  | Neg.    |             |      | Yes         |               |                  |                   |
| MO-29  |                  |         | Exon 19 del | Neg. | Yes         | EGFR          | 0.71             | p.746_750del      |
| MO-30  |                  | V600E   |             |      | Yes         | BRAF          | 0.40             | V600E             |
| MO-31  |                  | Neg.    |             |      | Yes (+)     | BRAF          | 0.39             | S457L             |
| MO-32  |                  |         | Neg.        | Neg. | Yes         |               |                  |                   |
| MO-33  |                  |         | Neg.        | Neg. | Yes         |               |                  |                   |
| MO-34  |                  | V600E   |             |      | Yes         | BRAF          | 0.26             | V600E             |
| MO-35  |                  | Neg.    |             |      | Yes         |               |                  |                   |
| MO-36  |                  | Neg.    |             |      | Yes         |               |                  |                   |
| MO-37  |                  | V600E   |             |      | Yes         | BRAF          | 0.66             | V600E             |
| MO-38  |                  | V600E   |             |      | Yes         | BRAF          | 0.42             | V600E             |
| MO-39  | Neg.             |         |             |      | Yes         |               |                  |                   |
| MO-40  |                  | T599dup |             |      | Yes         | BRAF          | 0.84             | T599dup           |
| MO-41  |                  |         | Neg.        | Neg. | Yes         |               |                  |                   |
| MO-42  |                  | Neg.    |             |      | Yes         |               |                  |                   |
| MO-43  |                  | Neg.    |             |      | Yes         |               |                  |                   |
| MO-44  |                  | V600E   |             |      | Yes         | BRAF          | 0.21             | V600E             |
| MO-45  | Neg.             |         |             |      | Yes         |               |                  |                   |
| MO-46  |                  |         | Neg.        | Neg. | Yes         |               |                  |                   |
| MO-47  |                  | Neg.    |             |      | Yes         |               |                  |                   |
| MO-48  |                  |         |             | Neg. | Yes         |               |                  |                   |
| MO-49  |                  |         | Neg.        | Neg. | Yes         |               |                  |                   |
| MO-50  | G12A             |         |             |      | Yes         | KRAS          | 0.57             | G12A              |
| MO-51  | G12D             |         |             |      | Yes         | KRAS          | 0.46             | G12D              |
| MO-52  |                  | Neg.    |             |      | Yes         |               |                  |                   |
| MO-53  |                  |         | Neg.        | Neg. | Yes         |               |                  |                   |
| MO-54  |                  |         | Exon 19 del | Neg. | Yes         | EGFR          | 0.91             | p.745_750del      |
| MO-55  |                  | T599dup |             |      | Yes         | BRAF          | 0.61             | T599dup           |
| MO-56  | Neg.             |         |             |      | Yes         |               |                  |                   |
| MO-57  |                  |         | Neg.        | Neg. | Yes         |               |                  |                   |
| MO-58  |                  | V600E   |             |      | Yes         | BRAF          | 0.39             | V600E             |
| MO-59  | G12V             |         |             |      | Yes         | KRAS          | 0.39             | G12V              |

| Sample | Clinical testing |             |             |               | OCP testing |                 |                  |                   |
|--------|------------------|-------------|-------------|---------------|-------------|-----------------|------------------|-------------------|
|        | <i>KRAS</i>      | <i>BRAF</i> | <i>EGFR</i> | <i>ALK</i>    | Concordant  | Gene / Fusion   | Variant Fraction | Amino Acid Change |
| MO-60  |                  | Neg.        |             |               | Yes         |                 |                  |                   |
| MO-61  |                  | V600E       |             |               | Yes         | <i>BRAF</i>     | 0.39             | V600E             |
| MO-62  |                  | V600E       |             |               | Yes         | <i>BRAF</i>     | 0.08             | V600E             |
| MO-63  |                  | V600E       |             |               | Yes         | <i>BRAF</i>     | 0.41             | V600E             |
| MO-64  |                  | Neg.        |             |               | Yes         |                 |                  |                   |
| MO-65  |                  |             | Neg.        | Neg.          | Yes         |                 |                  |                   |
| MO-66  |                  |             | Neg.        | Rearrangement | No          | None            | -                | -                 |
| MO-67  |                  | Neg.        |             |               | Yes         |                 |                  |                   |
| MO-68  |                  | V600E       |             |               | Yes         | <i>BRAF</i>     | 0.20             | V600E             |
| MO-69  |                  |             | Neg.        | Neg.          | Yes         |                 |                  |                   |
| MO-70  |                  | Neg.        |             |               | Yes         |                 |                  |                   |
| MO-71  |                  | V600E       |             |               | Yes         | <i>BRAF</i>     | 0.75             | V600E             |
| MO-72  |                  |             |             | Neg.          | Yes         |                 |                  |                   |
| MO-73  |                  | V600E       |             |               | Yes         | <i>BRAF</i>     | 0.30             | V600E             |
| MO-74  | G12V             |             |             |               | Yes         | <i>KRAS</i>     | 0.18             | G12V              |
| MO-75  |                  | V600E       |             |               | Yes         | <i>BRAF</i>     | 0.36             | V600E             |
| MO-76  |                  | Neg.        |             |               | Yes         |                 |                  |                   |
| MO-77  |                  | Neg.        | Neg.        | Neg.          | Yes         |                 |                  |                   |
| MO-78  |                  | Neg.        |             |               | Yes         |                 |                  |                   |
| MO-79  |                  | Neg.        |             |               | Yes         |                 |                  |                   |
| MO-80  |                  | Neg.        |             |               | Yes (+)     | <i>BRAF</i>     | 0.24             | G469E             |
| MO-81  |                  |             | Neg.        | Neg.          | Yes         |                 |                  |                   |
| MO-82  |                  |             | Neg.        | Neg.          | Yes         |                 |                  |                   |
| MO-83  |                  |             | L858R       | Neg.          | Yes         | <i>EGFR</i>     | 0.27             | L858R             |
| MO-84  |                  | Neg.        |             |               | Yes         |                 |                  |                   |
| MO-85  |                  | V600E       |             |               | Yes         | <i>BRAF</i>     | 0.09             | V600E             |
| MO-86  |                  | V600E       |             |               | Yes         | <i>BRAF</i>     | 0.46             | V600E             |
| MO-87  |                  | Neg.        | Neg.        | Neg.          | N/A         | N/A             | N/A              | N/A               |
| MO-88  | Neg.             |             |             |               | Yes         |                 |                  |                   |
| MO-89  |                  | Neg.        |             |               | Yes         |                 |                  |                   |
| MO-90  |                  | V600E       |             |               | Yes         | <i>BRAF</i>     | 0.41             | V600E             |
| MO-91  | Neg.             |             |             |               | Yes         |                 |                  |                   |
| MO-92  |                  | V600E       |             |               | Yes         | <i>BRAF</i>     | 0.55             | V600E             |
| MO-93  |                  | Neg.        | Neg.        | Neg.          | Yes         |                 |                  |                   |
| MO-94  | G12D             |             |             |               | N/A         | N/A             | N/A              | N/A               |
| MO-95  |                  |             | Neg.        | Neg.          | Yes         |                 |                  |                   |
| MO-96  | G12V             |             |             |               | Yes         | <i>KRAS</i>     | 0.25             | G12V              |
| MO-97  |                  | V600E       |             |               | Yes         | <i>BRAF</i>     | 0.66             | V600E             |
| MO-98  |                  | V600E       |             |               | Yes         | <i>BRAF</i>     | 0.51             | V600E             |
| MO-99  |                  | Neg.        |             |               | Yes         |                 |                  |                   |
| MO-100 |                  |             | Neg.        | Rearrangement | Yes         | <i>EML4:ALK</i> | -                | -                 |
| MO-101 | G12D             |             |             |               | Yes         | <i>KRAS</i>     | 0.49             | G12D              |
| MO-102 |                  | Neg.        |             |               | Yes         |                 |                  |                   |
| MO-103 | Neg.             |             |             |               | Yes         |                 |                  |                   |
| MO-104 | Q61K             |             |             |               | Yes         | <i>KRAS</i>     | 0.83             | Q61K              |
| MO-105 |                  | V600E       |             |               | Yes         | <i>BRAF</i>     | 0.32             | V600E             |
| MO-106 |                  |             |             | Rearrangement | Yes         | <i>EML4:ALK</i> | -                | -                 |

For each sample in the MO cohort, clinical molecular testing results for *KRAS*, *BRAF*, *EGFR*, and *ALK* are indicated (red = positive test result with alteration given; green = negative test result; gray = not tested). For each sample, concordance of clinical testing and OCP are indicated (Yes= OCP based alteration calls match clinical test results; Yes (+) = sequencing-based alteration calls are concordant with clinical test results, but a separate hotspot gain-of-function alteration in *BRAF* (not assayed by clinical testing) was identified; No=alteration identified by clinical testing was not identified using OCP; N/A=sample not sequenced/excluded due to low-quality DNA library (see **Table S2**)).

**Table S13: Comparison of Haloplex capture based NGS (MiPC) and targeted multiplexed PCR (OCP)**

| Sample | Gene          | Location        | Chr   | Pos       | Ref | Alt     | AA Change                | Variant Type      | Transcript ID (RefSeq) | Nucleotide Change    | MiPC Variant Allele |          |                     |           |           | OCP Variant Allele Frequency |         |                            |          |          |
|--------|---------------|-----------------|-------|-----------|-----|---------|--------------------------|-------------------|------------------------|----------------------|---------------------|----------|---------------------|-----------|-----------|------------------------------|---------|----------------------------|----------|----------|
|        |               |                 |       |           |     |         |                          |                   |                        |                      | MiPC FAO            | MiPC FDP | Frequency (FAO/FDP) | MiPC FSAF | MiPC FSAR | OCP FAO                      | OCP FDP | Allele Frequency (FAO/FDP) | OCP FSAF | OCP FSAR |
| PR-2   | <i>PIK3CA</i> | chr3:178952085  | chr3  | 178952085 | A   | G       | p.H1047R                 | missense          | NM_006218              | c.A3140G             | 31                  | 196      | 0.16                | 10        | 21        | 425                          | 2000    | 0.21                       | 195      | 230      |
| PR-7-3 | <i>RB1</i>    | chr13:48939088  | chr13 | 48939088  | C   | T       | p.T307I                  | missense          | NM_000321              | c.C920T              | 30                  | 79       | 0.38                | 16        | 14        | 44                           | 283     | 0.16                       | 17       | 27       |
| PR-10  | <i>BRCA2</i>  | chr13:32911710  | chr13 | 32911710  | A   | G       | p.Gln1073Arg             | missense          | NM_000059              | c.A3218G             | 19                  | 55       | 0.35                | 5         | 14        | 627                          | 1522    | 0.41                       | 288      | 339      |
| PR-14  | <i>TP53</i>   | chr17:7577153   | chr17 | 7577153   | C   | A       | p.Gly262Val              | missense          | NM_000546              | c.G785T              | 42                  | 80       | 0.53                | 23        | 19        | 507                          | 731     | 0.69                       | 293      | 214      |
| PR-15  | <i>SPOP</i>   | chr17:47696430  | chr17 | 47696430  | C   | A       | p.Trp131Cys              | missense          | NM_003563              | c.G393T              | 112                 | 151      | 0.74                | 77        | 35        | 291                          | 810     | 0.36                       | 259      | 32       |
| PR-17  | <i>TP53</i>   | chr17:7578554   | chr17 | 7578554   | A   | C       | p.Tyr126Asp              | missense          | NM_000546              | c.T376G              | 121                 | 453      | 0.27                | 84        | 37        | 402                          | 1539    | 0.26                       | 192      | 210      |
| PR-20  | <i>APC</i>    | chr5:112177334  | chr5  | 112177334 | G   | C       | p.Glu2015Gln             | missense          | NM_000038              | c.G6043C             | 15                  | 96       | 0.16                | 4         | 11        | 232                          | 1729    | 0.13                       | 111      | 121      |
| PR-21  | <i>AKT1</i>   | chr14:105246551 | chr14 | 105246551 | C   | T       | p.Glu17Lys               | missense          | NM_005163              | c.G49A               | 67                  | 321      | 0.21                | 17        | 50        | 413                          | 1782    | 0.23                       | 216      | 197      |
| PR-22  | <i>BRAF</i>   | chr7:140453137  | chr7  | 140453137 | C   | CTGTGTG | p.Thr599_Val600insHisThr | nonfsIns          | NM_004333              | c.1797_1798insCACACA | 24                  | 61       | 0.39                | 15        | 9         | 891                          | 1991    | 0.45                       | 467      | 424      |
| PR-24  | <i>SPOP</i>   | chr17:47696426  | chr17 | 47696426  | A   | C       | p.Phe133Val              | missense          | NM_003563              | c.T397G              | 21                  | 401      | 0.05                | 10        | 11        | 155                          | 1999    | 0.08                       | 89       | 66       |
| PR-24  | <i>TP53</i>   | chr17:7577550   | chr17 | 7577550   | C   | T       | p.Gly244Asp              | missense          | NM_000546              | c.G731A              | 42                  | 564      | 0.07                | 16        | 26        | 159                          | 2000    | 0.08                       | 84       | 75       |
| PR-25  | <i>PTEN</i>   | chr10:89717672  | chr10 | 89717672  | C   | T       | p.Arg233Ter              | nonsense          | NM_000314              | c.C697T              | 16                  | 22       | 0.73                | 8         | 8         | 1276                         | 1844    | 0.69                       | 551      | 725      |
| PR-25  | <i>ATM</i>    | chr11:108236203 | chr11 | 108236203 | C   | T       | p.Arg3047Ter             | nonsense          | NM_000051              | c.C9139T             | 9                   | 86       | 0.10                | 3         | 6         | 472                          | 2000    | 0.24                       | 202      | 270      |
| PR-26  | <i>TP53</i>   | chr17:7577107   | chr17 | 7577107   | A   | C       | p.Cys277Trp              | missense          | NM_000546              | c.T831G              | 41                  | 64       | 0.64                | 19        | 22        | 644                          | 916     | 0.70                       | 346      | 298      |
| PR-30  | <i>APC</i>    | chr5:112174125  | chr5  | 112174125 | GG  | TT      | p.Arg945Ile              | missense;nonfsSub | NM_000038              | c.2834_2835TT        | 21                  | 35       | 0.60                | 16        | 5         | 161                          | 783     | 0.21                       | 101      | 60       |
| PR-30  | <i>APC</i>    | chr5:112173531  | chr5  | 112173531 | C   | T       | p.Ser747Leu              | missense          | NM_000038              | c.C2240T             | 25                  | 91       | 0.27                | 12        | 13        | 994                          | 1995    | 0.50                       | 510      | 484      |
| PR-30  | <i>TP53</i>   | chr17:7578212   | chr17 | 7578212   | G   | A       | p.Arg213Ter              | nonsense          | NM_000546              | c.C637T              | 103                 | 590      | 0.17                | 47        | 56        | 363                          | 1999    | 0.18                       | 185      | 178      |
| PR-34  | <i>AR</i>     | chrX:66943543   | chrX  | 66943543  | C   | T       | p.His875Tyr              | missense          | NM_000044              | c.C2623T             | 36                  | 45       | 0.80                | 18        | 18        | 1519                         | 1997    | 0.76                       | 810      | 709      |
| PR-34  | <i>AR</i>     | chrX:66943552   | chrX  | 66943552  | A   | G       | p.Thr878Ala              | missense          | NM_000044              | c.A2632G             | 6                   | 45       | 0.13                | 3         | 3         | 89                           | 1994    | 0.04                       | NA       | NA       |
| PR-34  | <i>ATM</i>    | chr11:108205735 | chr11 | 108205735 | C   | T       | p.Gln2684Ter             | nonsense          | NM_000051              | c.C8050T             | 33                  | 141      | 0.23                | 15        | 18        | 485                          | 1650    | 0.29                       | 329      | 156      |
| PR-37  | <i>AR</i>     | chrX:66943543   | chrX  | 66943543  | C   | T       | p.His875Tyr              | missense          | NM_000044              | c.C2623T             | 8                   | 24       | 0.33                | 2         | 6         | 1004                         | 1995    | 0.50                       | 530      | 474      |
| PR-37  | <i>SPOP</i>   | chr17:47696426  | chr17 | 47696426  | A   | C       | p.Phe133Val              | missense          | NM_003563              | c.T397G              | 55                  | 215      | 0.26                | 23        | 32        | 578                          | 1999    | 0.29                       | 258      | 320      |
| PR-37  | <i>ERBB2</i>  | chr17:37881022  | chr17 | 37881022  | G   | A       | p.Arg784His              | missense          | NM_004448              | c.G2351A             | 95                  | 288      | 0.33                | 46        | 49        | 375                          | 1101    | 0.34                       | 201      | 174      |
| PR-40  | <i>BRCA2</i>  | chr13:32900640  | chr13 | 32900640  | G   | A       | p.Arg174His              | missense          | NM_000059              | c.G521A              | 15                  | 43       | 0.35                | 6         | 9         | 307                          | 1056    | 0.29                       | 127      | 180      |
| PR-40  | <i>TP53</i>   | chr17:7577580   | chr17 | 7577580   | T   | C       | p.Tyr234Cys              | missense          | NM_000546              | c.A701G              | 228                 | 759      | 0.30                | 136       | 92        | 363                          | 1234    | 0.29                       | 190      | 173      |
| PR-51  | <i>AR</i>     | chrX:66943543   | chrX  | 66943543  | C   | T       | p.His875Tyr              | missense          | NM_000044              | c.C2623T             | 21                  | 27       | 0.78                | 18        | 3         | 1744                         | 1995    | 0.87                       | 900      | 844      |
| PR-62  | <i>PTEN</i>   | chr10:89685307  | chr10 | 89685307  | T   | C       | p.Tyr68His               | missense          | NM_000314              | c.T202C              | 14                  | 20       | 0.70                | 10        | 4         | 1329                         | 1998    | 0.67                       | 616      | 713      |
| PR-62  | <i>ATM</i>    | chr11:108115569 | chr11 | 108115569 | C   | A       | p.F239L                  | missense          | NM_000051              | c.G418A              | 9                   | 30       | 0.30                | 4         | 5         | -                            | -       | -                          | -        | -        |
| PR-62  | <i>TP53</i>   | chr17:7577124   | chr17 | 7577124   | C   | T       | p.Val272Met              | missense          | NM_000546              | c.G814A              | 52                  | 72       | 0.72                | 29        | 23        | 774                          | 1000    | 0.77                       | 413      | 361      |
| PR-74  | <i>TP53</i>   | chr17:7576916   | chr17 | 7576916   | G   | GTT     | p.Asn310fs               | fsIns             | NM_000546              | c.929_930insAA       | 139                 | 214      | 0.65                | 85        | 54        | 333                          | 457     | 0.73                       | 159      | 174      |

All high-confidence non-synonymous OCP-targeted variant calls (n=30) from samples sequenced via both MiPC (Haloplex capture based Ion Torrent NGS) and OCP (v0.9a) are shown. For each variant, the gene, location (hg19), reference (Ref.) and variant (Alt.) alleles, amino acid (AA) change, function and transcript/nucleotide change are shown. Read level information is shown (FAO, FDP, variant allele frequency [FAO/FDP], FSAF, FSAR) for both MiPC and OCP (v0.9a) sequencing runs. FAO=flow corrected variant allele containing reads; FDP=flow corrected read depth; FSAF=forward strand flow corrected variant allele calling reads; FSAR=reverse strand flow corrected variant allele calling reads). A single variant called in MiPC, but not called via OCP sequencing (chr11:108115569;C>A) is highlighted in red.

**Table S14: OCP identified *TP53* alterations across treatment subtypes**

| <b>TP53 Alteration</b> | <b>Untreated</b> | <b>One Line of Treatment</b> | <b>Two or More Lines of Treatment</b> | <b>Small cell / Neuroendocrine Carcinoma</b> |
|------------------------|------------------|------------------------------|---------------------------------------|----------------------------------------------|
| Yes                    | 5 (9%)           | 1 (6%)                       | 17 (46%)                              | 8 (100%)                                     |
| No                     | 49 (91%)         | 16 (94%)                     | 20 (54%)                              | 0 (0%)                                       |
| <b>Total</b>           | <b>54</b>        | <b>17</b>                    | <b>37</b>                             | <b>8</b>                                     |

**$p < 0.001$**

Contingency table of PR samples examining OCP identified *TP53* alteration across treatment subtypes. Samples with one line of treatment include those that have received only androgen deprivation (ADT) or radiation therapy (XRT), but not both. Samples with two or more lines of treatment were treated with some combination of ADT, XRT, or systemic chemotherapy. Fisher's exact test results reported (exact p-value: 4.67 x10e-9).



**Table S15: ATM alterations across treatment subtypes**

| <b>ATM alteration</b> | <b>ADT+ Adenocarcinoma</b> | <b>Small Cell / Neuroendocrine Carcinomas</b> |
|-----------------------|----------------------------|-----------------------------------------------|
| Yes                   | 7 (32%)                    | 0 (0%)                                        |
| No                    | 15 (68%)                   | 8 (100%)                                      |
| <b>Total</b>          | <b>22</b>                  | <b>8</b>                                      |

$p = 0.14$

Contingency table of ATM alteration status across treatment subtypes (ADT+ and SCCs). ADT+ includes any adenocarcinoma samples that received anti-androgen therapy plus some combination of radiation or chemotherapy. Fisher's exact test results reported.

**Table S16: *IDH1* R132 mutations and ETS in prostate cancer identified in cBioPortal**

| <b>Study</b>                     | <b>Total samples</b> | <b>Samples with <i>ERG/ETV1</i> fusions or <i>SPOP</i> mutations</b> | <b>Samples with <i>IDH1</i> R132 mutations</b> | <b>Samples with <i>ERG/ETV1/SPOP</i> and <i>IDH1</i> alterations</b> |
|----------------------------------|----------------------|----------------------------------------------------------------------|------------------------------------------------|----------------------------------------------------------------------|
| Prostate (MICH)                  | 61                   | 35                                                                   | 0                                              | 0                                                                    |
| Prostate (TCGA)                  | 236                  | 142                                                                  | 4                                              | 0                                                                    |
| Prostate (Broad/Cornell 2013)    | 56                   | 30                                                                   | 1                                              | 0                                                                    |
| <i>Current study (PR cohort)</i> | 100                  | 62                                                                   | 1                                              | 0                                                                    |
| <b>Total</b>                     | <b>453</b>           | <b>269</b>                                                           | <b>6</b>                                       | <b>0 (<i>p</i>=0.004)</b>                                            |

Contingency table of *IDH1* R132 mutations vs. *ERG/ETV1* fusions or *SPOP* mutations from 3 NGS studies in cBioPortal (Michigan Prostate, TCGA Prostate, Broad/CornellGrasso) and the current study. Only PR samples included in both DNA and RNA analyses in our study were included in this analysis. Fisher's exact test results reported.
